# Supplementary material
Source: PubMed Central journal article supplement (PMC3370878)
Supplement: supp_194.12.3144_TableS1-S3.pdf [file supp_194.12.3144_TableS1-S3.pdf]

**Supplemental Table 1: List of all proteins** detected by 1D-SDS-PAGE and LC-MS/MS in three biological replicates of cells grown on oxalate including previously published acetate and methanol samples.

| Gene number | description (gene name)                                    | spectral counts (%) |            |            |             |             |             |            |            |            | average spectral counts (%) |          |         | fold change        |                     | p value |      |
|-------------|------------------------------------------------------------|---------------------|------------|------------|-------------|-------------|-------------|------------|------------|------------|-----------------------------|----------|---------|--------------------|---------------------|---------|------|
|             |                                                            | acetate S1          | acetate S2 | acetate S3 | methanol S1 | methanol S2 | methanol S3 | oxalate S1 | oxalate S2 | oxalate S3 | acetate                     | methanol | oxalate | oxalate vs acetate | oxalate vs methanol |         |      |
| META1_0001  | DNA replication initiator protein, transcriptional regulat | 0.000               | 0.340      | 0.346      | 0.000       | 0.665       | 0.567       | 0.428      | 0.406      | 0.377      | 0.263                       | 0.524    | 0.403   | 2.07               | 0.40                | 1.15    | 0.31 |
| META1_0002  | DNA polymerase II, beta-subunit                            | 1.051               | 1.020      | 0.990      | 0.676       | 0.903       | 0.851       | 0.836      | 0.850      | 0.754      | 1.016                       | 0.847    | 0.813   | 1.08               | 0.01                | 1.44    | 0.92 |
| META1_0003  | putative RecF protein                                      | 0.000               | 0.000      | 0.000      | 0.000       | 0.071       | 0.047       | 0.000      | 0.000      | 0.000      | 0.000                       | 0.050    | 0.000   | n.d.               | n.d.                | 0.00    | 0.12 |
| META1_0010  | phosphoribosylformylglycinamide synthetase                 | 0.740               | 0.725      | 0.742      | 1.217       | 1.021       | 1.016       | 1.393      | 1.198      | 0.953      | 0.735                       | 1.048    | 1.176   | 2.16               | 0.01                | 1.68    | 0.57 |
| META1_0012  | glutaredoxin-like protein                                  | 0.234               | 0.385      | 0.346      | 0.406       | 0.594       | 0.520       | 0.386      | 0.251      | 0.536      | 0.336                       | 0.534    | 0.390   | 1.57               | 0.56                | 1.09    | 0.30 |
| META1_0016  | protein of unknown function                                | 0.000               | 0.000      | 0.000      | 0.000       | 0.000       | 0.000       | 0.150      | 0.000      | 0.040      | 0.000                       | 0.000    | 0.060   | n.d.               | 0.12                | n.d.    | 0.12 |
| META1_0017  | putative sensor hybrid histidine kinase with PAS/PAC d     | 0.000               | 0.000      | 0.000      | 0.000       | 0.000       | 0.047       | 0.064      | 0.000      | 0.060      | 0.000                       | 0.020    | 0.040   | n.d.               | 0.12                | 3.00    | 0.53 |
| META1_0018  | conserved protein of unknown function; ATP-binding d       | 0.195               | 0.408      | 0.322      | 0.135       | 0.404       | 0.354       | 0.343      | 0.251      | 0.278      | 0.327                       | 0.343    | 0.289   | 1.19               | 0.93                | 1.26    | 0.85 |
| META1_0020  | putative Short-chain dehydrogenase/reductase SDR           | 0.078               | 0.136      | 0.148      | 0.000       | 0.000       | 0.000       | 0.000      | 0.058      | 0.040      | 0.127                       | 0.000    | 0.034   | 0.36               | 0.51                | n.d.    | 0.12 |
| META1_0025  | malonate decarboxylase, beta-subunit                       | 0.000               | 0.113      | 0.000      | 0.000       | 0.000       | 0.047       | 0.150      | 0.213      | 0.139      | 0.045                       | 0.020    | 0.168   | 5.00               | 0.13                | 12.50   | 0.18 |
| META1_0026  | Malonate decarboxylase, gamma subunit                      | 0.000               | 0.045      | 0.074      | 0.000       | 0.071       | 0.118       | 0.236      | 0.290      | 0.198      | 0.045                       | 0.081    | 0.242   | 7.20               | 0.60                | 4.50    | 0.53 |
| META1_0049  | tryptophan synthase, beta protein                          | 0.545               | 0.861      | 0.693      | 0.406       | 0.855       | 0.780       | 0.643      | 0.657      | 0.377      | 0.726                       | 0.756    | 0.558   | 1.04               | 0.35                | 1.11    | 0.58 |
| META1_0051  | conserved protein of unknown function; putative expor      | 0.156               | 0.000      | 0.000      | 0.135       | 0.000       | 0.000       | 0.150      | 0.155      | 0.198      | 0.036                       | 0.020    | 0.168   | 6.25               | 0.12                | 12.50   | 0.13 |
| META1_0052  | integration host factor (IHF), beta subunit; site-speci    | 0.117               | 0.136      | 0.173      | 0.000       | 0.119       | 0.142       | 0.107      | 0.135      | 0.139      | 0.145                       | 0.111    | 0.128   | 1.19               | 0.50                | 1.73    | 0.37 |
| META1_0053  | putative peptidase                                         | 0.506               | 0.725      | 0.718      | 0.406       | 0.048       | 0.284       | 0.557      | 0.522      | 0.437      | 0.671                       | 0.202    | 0.504   | 1.01               | 0.15                | 3.75    | 0.19 |
| META1_0054  | protein of unknown function                                | 0.000               | 0.000      | 0.000      | 0.000       | 0.119       | 0.047       | 0.000      | 0.116      | 0.079      | 0.000                       | 0.071    | 0.067   | n.d.               | 0.12                | 1.43    | 0.97 |
| META1_0055  | 30S ribosomal subunit protein S1                           | 6.503               | 6.548      | 7.794      | 6.308       | 7.601       | 6.308       | 7.327      | 6.901      | 6.808      | 6.994                       | 6.904    | 7.003   | 1.35               | 0.86                | 1.52    | 0.68 |
| META1_0057  | rRNA methylase                                             | 0.389               | 0.476      | 0.495      | 0.744       | 0.095       | 0.189       | 0.450      | 0.406      | 0.377      | 0.463                       | 0.232    | 0.410   | 1.20               | 0.35                | 2.65    | 0.42 |
| META1_0063  | conserved protein of unknown function                      | 0.000               | 0.000      | 0.000      | 0.271       | 0.285       | 0.118       | 0.129      | 0.097      | 0.079      | 0.000                       | 0.212    | 0.101   | n.d.               | 0.00                | 0.71    | 0.08 |
| META1_0064  | conserved exported protein of unknown function             | 0.584               | 0.657      | 0.569      | 0.947       | 0.713       | 0.732       | 0.793      | 0.831      | 0.675      | 0.608                       | 0.756    | 0.766   | 1.70               | 0.04                | 1.52    | 0.77 |
| META1_0070  | membrane protein of unknown function                       | 0.000               | 0.091      | 0.099      | 0.000       | 0.143       | 0.118       | 0.043      | 0.058      | 0.000      | 0.073                       | 0.111    | 0.034   | 0.63               | 0.93                | 0.45    | 0.89 |
| META1_0071  | protein of unknown function; putative exported protei      | 0.273               | 0.249      | 0.173      | 0.000       | 0.285       | 0.213       | 0.129      | 0.174      | 0.119      | 0.227                       | 0.212    | 0.141   | 0.84               | 0.05                | 1.00    | 0.29 |
| META1_0072  | protein of unknown function                                | 0.000               | 0.000      | 0.000      | 0.000       | 0.048       | 0.000       | 0.000      | 0.000      | 0.000      | 0.000                       | 0.020    | 0.000   | n.d.               | n.d.                | 0.00    | 0.37 |
| META1_0074  | protein of unknown function                                | 0.000               | 0.340      | 0.049      | 0.000       | 0.000       | 0.000       | 0.000      | 0.000      | 0.000      | 0.154                       | 0.000    | 0.000   | 0.00               | 0.12                | n.d.    | n.d. |
| META1_0076  | Prin-like protein                                          | 0.000               | 0.000      | 0.000      | 0.000       | 0.048       | 0.000       | 0.043      | 0.000      | 0.000      | 0.000                       | 0.020    | 0.013   | n.d.               | 0.37                | 1.00    | 0.99 |
| META1_0083  | putative ATP-binding protein with two ATPase domains       | 0.000               | 0.068      | 0.247      | 0.203       | 0.356       | 0.189       | 0.129      | 0.213      | 0.218      | 0.118                       | 0.262    | 0.188   | 2.15               | 0.43                | 1.08    | 0.36 |
| META1_0086  | protein of unknown function                                | 0.000               | 0.000      | 0.000      | 0.000       | 0.000       | 0.000       | 0.000      | 0.000      | 0.000      | 0.000                       | 0.000    | 0.013   | n.d.               | 0.37                | n.d.    | 0.37 |
| META1_0087  | conserved protein of unknown function; putative hydr       | 0.000               | 0.000      | 0.000      | 0.000       | 0.000       | 0.000       | 0.043      | 0.058      | 0.040      | 0.000                       | 0.000    | 0.047   | n.d.               | 0.00                | n.d.    | 0.00 |
| META1_0090  | Glycosyl transferase group 1                               | 0.000               | 0.000      | 0.000      | 0.000       | 0.000       | 0.000       | 0.043      | 0.058      | 0.040      | 0.000                       | 0.000    | 0.047   | n.d.               | 0.00                | n.d.    | 0.00 |
| META1_0096  | putative methyltransferase, putative O-methyltransfer      | 0.000               | 0.000      | 0.074      | 0.000       | 0.071       | 0.189       | 0.064      | 0.058      | 0.079      | 0.027                       | 0.111    | 0.067   | 3.33               | 0.11                | 0.91    | 0.30 |
| META1_0105  | D-3-phosphoglycerate dehydrogenase                         | 3.660               | 2.606      | 2.672      | 0.473       | 1.045       | 1.465       | 1.178      | 1.527      | 1.151      | 2.876                       | 1.139    | 1.290   | 0.61               | 0.00                | 1.70    | 0.37 |
| META1_0106  | Putative oxidoreductase (automated annotation calle        | 0.389               | 0.906      | 0.594      | 0.000       | 0.356       | 0.213       | 0.257      | 0.329      | 0.258      | 0.671                       | 0.242    | 0.282   | 0.57               | 0.04                | 1.75    | 0.38 |
| META1_0119  | protein of unknown function                                | 0.000               | 0.000      | 0.000      | 0.000       | 0.000       | 0.000       | 0.000      | 0.000      | 0.060      | 0.000                       | 0.000    | 0.020   | n.d.               | 0.37                | n.d.    | 0.37 |
| META1_0120  | RNA polymerase sigma factor                                | 0.000               | 0.000      | 0.000      | 0.000       | 0.048       | 0.000       | 0.086      | 0.077      | 0.079      | 0.000                       | 0.020    | 0.081   | n.d.               | 0.00                | 6.00    | 0.14 |
| META1_0121  | conserved protein of unknown function                      | 0.000               | 0.000      | 0.000      | 0.000       | 0.000       | 0.000       | 0.129      | 0.097      | 0.060      | 0.000                       | 0.000    | 0.094   | n.d.               | 0.00                | n.d.    | 0.00 |
| META1_0122  | putative catalase                                          | 0.000               | 0.000      | 0.000      | 0.000       | 0.000       | 0.000       | 0.000      | 0.000      | 0.060      | 0.000                       | 0.000    | 0.020   | n.d.               | 0.37                | n.d.    | 0.37 |
| META1_0130  | Potassium-transporting ATPase B chain (Potassium- tra      | 0.000               | 0.000      | 0.000      | 0.000       | 0.000       | 0.000       | 0.043      | 0.000      | 0.000      | 0.000                       | 0.000    | 0.013   | n.d.               | 0.37                | n.d.    | 0.37 |
| META1_0162  | putative resolvas                                          | 0.000               | 0.000      | 0.074      | 0.000       | 0.048       | 0.047       | 0.107      | 0.116      | 0.119      | 0.027                       | 0.040    | 0.114   | 5.67               | 0.14                | 4.25    | 0.50 |
| META1_0165  | recognition protein                                        | 0.000               | 0.000      | 0.000      | 0.000       | 0.165       | 0.150       | 0.150      | 0.193      | 0.079      | 0.000                       | 0.151    | 0.141   | n.d.               | 0.00                | 1.51    | 0.43 |
| META1_0166  | putative Zn dependent carboxypeptidase                     | 0.857               | 1.020      | 0.965      | 0.338       | 0.831       | 0.756       | 0.407      | 0.503      | 0.675      | 0.962                       | 0.726    | 0.531   | 0.75               | 0.02                | 1.10    | 0.68 |
| META1_0167  | molecular chaperone, HSP70 class                           | 0.117               | 0.227      | 0.223      | 0.135       | 0.808       | 0.543       | 0.428      | 0.406      | 0.397      | 0.200                       | 0.595    | 0.410   | 2.77               | 0.02                | 1.03    | 0.93 |
| META1_0168  | Pseudouridine synthase, RluD                               | 0.000               | 0.113      | 0.099      | 0.000       | 0.166       | 0.189       | 0.129      | 0.251      | 0.179      | 0.082                       | 0.151    | 0.188   | 3.11               | 0.46                | 1.87    | 0.38 |
| META1_0169  | putative haloacid dehalogenase family hydrolase            | 0.000               | 0.000      | 0.000      | 0.000       | 0.000       | 0.000       | 0.043      | 0.000      | 0.000      | 0.000                       | 0.000    | 0.013   | n.d.               | 0.37                | n.d.    | 0.37 |
| META1_0170  | conserved protein of unknown function; putative doma       | 0.000               | 0.000      | 0.000      | 0.135       | 0.000       | 0.118       | 0.236      | 0.155      | 0.159      | 0.000                       | 0.071    | 0.181   | n.d.               | 0.00                | 3.86    | 0.43 |
| META1_0172  | propionyl-CoA carboxylase beta chain                       | 2.842               | 2.538      | 3.810      | 2.435       | 2.898       | 3.402       | 1.971      | 2.165      | 1.985      | 3.075                       | 3.044    | 2.043   | 0.90               | 0.03                | 1.01    | 0.03 |
| META1_0173  | protein of unknown function                                | 0.000               | 0.000      | 0.000      | 0.000       | 0.000       | 0.000       | 0.150      | 0.077      | 0.000      | 0.000                       | 0.000    | 0.074   | n.d.               | 0.12                | n.d.    | 0.12 |
| META1_0174  | transcriptional regulator TetR family                      | 0.000               | 0.091      | 0.099      | 0.000       | 0.166       | 0.284       | 0.279      | 0.406      | 0.298      | 0.073                       | 0.192    | 0.329   | 6.13               | 0.58                | 2.58    | 0.44 |
| META1_0175  | ketol-acid reductoisomerase                                | 2.025               | 1.020      | 1.534      | 2.841       | 2.922       | 3.544       | 3.214      | 2.571      | 3.136      | 1.442                       | 3.175    | 2.964   | 2.77               | 0.03                | 1.40    | 0.69 |
| META1_0176  | putative pyridoxamine 5'-phosphate oxidase-related         | 0.000               | 0.204      | 0.272      | 0.271       | 0.238       | 0.425       | 0.257      | 0.406      | 0.258      | 0.181                       | 0.323    | 0.309   | 2.30               | 0.41                | 1.44    | 0.98 |
| META1_0178  | crotonyl-CoA carboxylase/reductase                         | 3.660               | 2.538      | 2.474      | 3.517       | 3.064       | 3.071       | 1.542      | 1.546      | 1.449      | 2.776                       | 3.135    | 1.512   | 0.74               | 0.01                | 0.72    | 0.00 |
| META1_0179  | catalase (hydroperoxidase II)                              | 2.219               | 1.473      | 1.856      | 0.000       | 0.119       | 0.000       | 0.171      | 0.097      | 0.159      | 1.787                       | 0.050    | 0.141   | 0.11               | 0.00                | 4.20    | 0.12 |
| META1_0180  | ethylmalonyl-CoA mutase                                    | 1.519               | 1.903      | 2.400      | 2.435       | 1.159       | 2.693       | 1.992      | 2.107      | 1.925      | 1.996                       | 2.553    | 2.009   | 1.36               | 0.07                | 1.06    | 0.02 |
| META1_0181  | conserved protein of unknown function                      | 0.078               | 0.000      | 0.000      | 0.000       | 0.000       | 0.000       | 0.000      | 0.000      | 0.000      | 0.018                       | 0.000    | 0.000   | 0.00               | 0.37                | n.d.    | n.d. |
| META1_0182  | Short-chain dehydrogenase/reductase SDR                    | 0.000               | 0.136      | 0.297      | 0.406       | 0.404       | 0.496       | 0.536      | 0.329      | 0.278      | 0.163                       | 0.443    | 0.376   | 3.11               | 0.48                | 1.27    | 0.46 |
| META1_0184  | Tryptophanyl tRNA synthetase                               | 0.389               | 0.793      | 0.594      | 0.271       | 0.665       | 0.638       | 0.836      | 0.657      | 0.615      | 0.626                       | 0.595    | 0.699   | 1.51               | 0.42                | 1.76    | 0.31 |
| META1_0186  | Isopropylmalate dehydratase small subunit/isopropylm       | 0.078               | 0.385      | 0.297      | 0.609       | 0.665       | 0.803       | 0.536      | 0.657      | 0.456      | 0.281                       | 0.716    | 0.551   | 2.65               | 0.13                | 1.15    | 0.15 |
| META1_0187  | putative pyrrolidone-carboxylate peptidase                 | 0.000               | 0.000      | 0.000      | 0.000       | 0.000       | 0.000       | 0.043      | 0.000      | 0.000      | 0.000                       | 0.000    | 0.013   | n.d.               | 0.37                | n.d.    | 0.37 |
| META1_0188  | methylmalonyl-CoA mutase accessory protein                 | 0.000               | 0.227      | 0.124      | 0.406       | 0.261       | 0.236       | 0.257      | 0.251      | 0.218      | 0.136                       | 0.272    | 0.242   | 2.40               | 0.43                | 1.33    | 0.33 |
| META1_0189  | conserved protein of unknown function; putative expor      | 0.000               | 0.068      | 0.049      | 0.000       | 0.000       | 0.047       | 0.086      | 0.039      | 0.040      | 0.045                       | 0.020    | 0.054   | 1.60               | 0.36                | 4.00    | 0.12 |
| META1_0190  | conserved protein of unknown function                      | 0.467               | 0.295      | 0.346      | 0.406       | 0.333       | 0.331       | 0.407      | 0.367      | 0.337      | 0.354                       | 0.343    | 0.370   | 1.41               | 0.90                | 1.62    | 0.66 |
| META1_0191  | putative Acylaminoacyl-peptidase                           | 0.857               | 0.884      | 0.817      | 0.812       | 0.570       | 0.118       | 0.771      | 0.580      | 0.576      | 0.853                       | 0.413    | 0.638   | 1.01               | 0.04                | 2.32    | 0.44 |
| META1_0192  | conserved protein of unknown function precursor, ErkK      | 0.467               | 0.295      | 0.346      | 0.947       | 0.285       | 0.591       | 0.428      | 0.657      | 0.675      | 0.354                       | 0.514    | 0.591   | 2.26               | 0.08                | 1.73    | 0.88 |
| META1_0195  | Nuclease sbcCD subunit C                                   | 0.000               | 0.068      | 0.074      | 0.000       | 0.261       | 0.118       | 0.086      | 0.174      | 0.198      | 0.054                       | 0.161    | 0.135   | 3.83               | 0.48                | 1.44    | 0.35 |
| META1_0198  | conserved exported protein of unknown function             | 0.000               | 0.045      | 0.049      | 0.000       | 0.000       | 0.000       | 0.036      | 0.000      | 0.040      | 0.036                       | 0.000    | 0.013   | 0.50               | 0.53                | n.d.    | 0.37 |
| META1_0199  | conserved protein of unknown function; putative SAM-       | 0.000               | 0.113      | 0.099      | 0.000       |             |             |            |            |            |                             |          |         |                    |                     |         |      |

|            |                                                            |       |       |       |       |       |       |       |       |       |       |       |       |       |      |       |      |
|------------|------------------------------------------------------------|-------|-------|-------|-------|-------|-------|-------|-------|-------|-------|-------|-------|-------|------|-------|------|
| META1_0312 | efflux transporter (AcrB/AcrD/AcrF family multidrug eff    | 0.000 | 0.000 | 0.000 | 0.000 | 0.000 | 0.047 | 0.000 | 0.097 | 0.000 | 0.000 | 0.020 | 0.034 | n.d.  | 0.37 | 2.50  | 0.96 |
| META1_0314 | Heat-inducible transcription repressor HrcA                | 0.000 | 0.204 | 0.198 | 0.135 | 0.166 | 0.189 | 0.214 | 0.155 | 0.099 | 0.154 | 0.171 | 0.155 | 1.35  | 0.33 | 1.35  | 0.74 |
| META1_0317 | Ribonuclease PH (RNase PH) (RNA nucleotidyltransfera       | 0.389 | 0.317 | 0.346 | 0.473 | 0.166 | 0.402 | 0.257 | 0.329 | 0.377 | 0.345 | 0.312 | 0.323 | 1.26  | 0.48 | 1.55  | 0.99 |
| META1_0318 | non-canonical purine NTP pyrophosphatase, RdgB/HAM         | 0.000 | 0.068 | 0.074 | 0.203 | 0.166 | 0.189 | 0.107 | 0.232 | 0.139 | 0.054 | 0.181 | 0.161 | 4.00  | 0.49 | 1.33  | 0.43 |
| META1_0320 | putative extracellular ligand-binding receptor precursor   | 0.117 | 0.045 | 0.074 | 0.135 | 0.119 | 0.236 | 0.129 | 0.058 | 0.079 | 0.073 | 0.171 | 0.087 | 1.63  | 0.72 | 0.76  | 0.12 |
| META1_0321 | putative methyltransferase                                 | 0.117 | 0.135 | 0.124 | 0.135 | 0.119 | 0.189 | 0.107 | 0.119 | 0.107 | 0.127 | 0.165 | 0.101 | 1.07  | 0.17 | 1.07  | 0.11 |
| META1_0323 | Response regulator receiver protein                        | 0.156 | 0.181 | 0.272 | 0.271 | 0.190 | 0.189 | 0.321 | 0.193 | 0.218 | 0.209 | 0.202 | 0.242 | 1.57  | 0.45 | 1.80  | 0.60 |
| META1_0328 | Peptidyl-dipeptidase                                       | 0.000 | 0.000 | 0.049 | 0.000 | 0.095 | 0.000 | 0.171 | 0.174 | 0.099 | 0.018 | 0.040 | 0.148 | 11.00 | 0.17 | 5.50  | 0.14 |
| META1_0329 | formate-tetrahydrofolate ligase (formyltetrahydrofolate    | 1.363 | 1.473 | 1.237 | 4.058 | 4.513 | 3.709 | 3.706 | 3.595 | 3.890 | 1.361 | 4.102 | 3.730 | 3.70  | 0.00 | 1.36  | 0.21 |
| META1_0330 | putative coo ion binding protein; putative heavy me        | 0.078 | 0.068 | 0.049 | 0.000 | 0.143 | 0.000 | 0.000 | 0.039 | 0.060 | 0.064 | 0.060 | 0.034 | 0.71  | 0.41 | 0.83  | 0.45 |
| META1_0331 | conserved protein of unknown function; putative EAL d      | 0.000 | 0.000 | 0.000 | 0.000 | 0.071 | 0.071 | 0.064 | 0.058 | 0.040 | 0.000 | 0.060 | 0.054 | n.d.  | 0.00 | 1.33  | 0.34 |
| META1_0333 | conserved protein of unknown function; chemotaxis pr       | 0.000 | 0.000 | 0.000 | 0.000 | 0.119 | 0.000 | 0.150 | 0.097 | 0.119 | 0.000 | 0.050 | 0.121 | n.d.  | 0.00 | 3.60  | 0.12 |
| META1_0334 | putative response regulator receiver (CheY-like protein    | 0.156 | 0.249 | 0.124 | 0.879 | 0.428 | 0.591 | 0.450 | 0.367 | 0.595 | 0.181 | 0.564 | 0.470 | 3.50  | 0.02 | 1.25  | 0.34 |
| META1_0335 | putative riboflavin biosynthesis protein ribF [Includes: R | 0.156 | 0.136 | 0.173 | 0.203 | 0.143 | 0.189 | 0.150 | 0.174 | 0.119 | 0.154 | 0.171 | 0.148 | 1.29  | 0.69 | 1.29  | 0.29 |
| META1_0336 | putative 2-hydroxyacid dehydrogenase                       | 0.973 | 0.838 | 0.668 | 1.014 | 0.903 | 0.827 | 0.814 | 0.812 | 0.953 | 0.807 | 0.887 | 0.860 | 1.44  | 0.71 | 1.45  | 0.48 |
| META1_0337 | conserved protein of unknown function precursor            | 0.234 | 0.227 | 0.124 | 0.406 | 0.238 | 0.189 | 0.214 | 0.290 | 0.179 | 0.191 | 0.242 | 0.228 | 1.62  | 0.52 | 1.42  | 0.57 |
| META1_0338 | Putative ferric uptake regulator family                    | 0.000 | 0.204 | 0.198 | 0.338 | 0.143 | 0.047 | 0.107 | 0.000 | 0.179 | 0.154 | 0.131 | 0.094 | 0.82  | 0.95 | 1.08  | 0.38 |
| META1_0339 | Beta-hydroxyacyl-[acyl-carrier-protein] dehydratase        | 0.623 | 0.612 | 0.495 | 0.473 | 0.499 | 0.260 | 0.600 | 0.657 | 0.615 | 0.572 | 0.393 | 0.625 | 1.48  | 0.35 | 2.38  | 0.10 |
| META1_0340 | 3-oxoacyl-[acyl-carrier-protein] synthase I                | 1.947 | 0.770 | 0.891 | 0.879 | 1.140 | 1.158 | 1.221 | 0.928 | 0.834 | 1.089 | 1.109 | 0.988 | 1.23  | 0.73 | 1.34  | 0.66 |
| META1_0342 | Enoyl-[acyl-carrier-protein] reductase (NADH)              | 0.389 | 0.249 | 0.272 | 0.541 | 0.095 | 0.213 | 0.364 | 0.290 | 0.298 | 0.290 | 0.212 | 0.316 | 1.47  | 0.73 | 2.24  | 0.53 |
| META1_0344 | conserved protein of unknown function; putative inner      | 0.000 | 0.045 | 0.000 | 0.000 | 0.000 | 0.000 | 0.000 | 0.000 | 0.000 | 0.018 | 0.000 | 0.000 | 0.00  | 0.37 | n.d.  | n.d. |
| META1_0346 | protein of unknown function; putative exported protein     | 0.000 | 0.045 | 0.074 | 0.473 | 0.119 | 0.000 | 0.129 | 0.193 | 0.179 | 0.045 | 0.121 | 0.168 | 5.00  | 0.53 | 2.08  | 0.33 |
| META1_0347 | Peptidase S9, prolyl oligopeptidase                        | 0.818 | 1.178 | 1.212 | 1.082 | 1.259 | 1.110 | 1.093 | 0.947 | 0.794 | 1.107 | 1.169 | 0.941 | 1.15  | 0.50 | 1.21  | 0.12 |
| META1_0348 | Transcriptional regulatory protein mucR                    | 0.740 | 0.521 | 0.322 | 0.947 | 0.760 | 0.543 | 0.793 | 0.715 | 0.814 | 0.499 | 0.695 | 0.773 | 2.09  | 0.15 | 1.67  | 0.76 |
| META1_0349 | protein of unknown function                                | 0.195 | 0.136 | 0.099 | 0.000 | 0.000 | 0.000 | 0.086 | 0.039 | 0.060 | 0.136 | 0.000 | 0.060 | 0.60  | 0.05 | n.d.  | 0.00 |
| META1_0351 | putative sulfur acceptor protein sufE                      | 0.000 | 0.000 | 0.000 | 0.000 | 0.119 | 0.047 | 0.064 | 0.039 | 0.000 | 0.000 | 0.071 | 0.034 | n.d.  | 0.12 | 0.71  | 0.96 |
| META1_0352 | protein of unknown function; putative sensor protein; s    | 0.156 | 0.113 | 0.049 | 0.000 | 0.071 | 0.095 | 0.086 | 0.000 | 0.000 | 0.100 | 0.071 | 0.027 | 0.36  | 0.12 | 0.57  | 0.52 |
| META1_0357 | protein of unknown function; putative PYP-like sensor c    | 0.000 | 0.045 | 0.000 | 0.000 | 0.000 | 0.000 | 0.000 | 0.000 | 0.000 | 0.018 | 0.000 | 0.000 | 0.00  | 0.37 | n.d.  | n.d. |
| META1_0358 | conserved protein of unknown function                      | 0.078 | 0.091 | 0.173 | 0.000 | 0.000 | 0.000 | 0.086 | 0.058 | 0.040 | 0.118 | 0.000 | 0.060 | 0.69  | 0.14 | n.d.  | 0.00 |
| META1_0359 | putative lactoylglutathione lyase                          | 0.623 | 0.453 | 0.173 | 0.338 | 0.095 | 0.189 | 0.171 | 0.116 | 0.298 | 0.390 | 0.171 | 0.195 | 0.67  | 0.21 | 1.71  | 0.99 |
| META1_0360 | protein of unknown function                                | 0.078 | 0.181 | 0.099 | 0.000 | 0.000 | 0.118 | 0.236 | 0.232 | 0.139 | 0.127 | 0.050 | 0.202 | 2.14  | 0.14 | 6.00  | 0.14 |
| META1_0361 | aminopeptidase N, a cysteinylglycine, (alpha-aminoac       | 0.056 | 0.884 | 0.866 | 0.541 | 0.618 | 0.402 | 0.450 | 0.638 | 0.635 | 0.789 | 0.514 | 0.578 | 0.99  | 0.31 | 1.69  | 0.58 |
| META1_0363 | arginase (arginine amidinase)                              | 0.000 | 0.000 | 0.000 | 0.000 | 0.000 | 0.000 | 0.000 | 0.000 | 0.040 | 0.000 | 0.000 | 0.013 | n.d.  | 0.37 | n.d.  | 0.37 |
| META1_0364 | Glucose-6-phosphate 1-dehydrogenase (G6PD)                 | 0.273 | 0.702 | 0.495 | 0.203 | 0.356 | 0.473 | 0.407 | 0.387 | 0.377 | 0.526 | 0.383 | 0.390 | 1.00  | 0.60 | 1.53  | 0.50 |
| META1_0366 | protein of unknown function                                | 0.000 | 0.000 | 0.000 | 0.000 | 0.095 | 0.000 | 0.107 | 0.058 | 0.119 | 0.000 | 0.040 | 0.094 | n.d.  | 0.00 | 3.50  | 0.11 |
| META1_0368 | copper binding protein, copper sensitivity                 | 0.000 | 0.045 | 0.000 | 0.000 | 0.000 | 0.000 | 0.000 | 0.000 | 0.000 | 0.018 | 0.000 | 0.000 | 0.00  | 0.37 | n.d.  | n.d. |
| META1_0369 | putative inorganic polyphosphate (ATP)-NAD kinase (Pol     | 0.000 | 0.000 | 0.000 | 0.000 | 0.000 | 0.000 | 0.086 | 0.077 | 0.060 | 0.000 | 0.000 | 0.074 | n.d.  | 0.00 | n.d.  | 0.00 |
| META1_0371 | 16S rRNA m5C967 methyltransferase, S-adenosyl-L-met        | 0.000 | 0.068 | 0.124 | 0.135 | 0.190 | 0.189 | 0.086 | 0.155 | 0.139 | 0.073 | 0.181 | 0.128 | 2.38  | 0.42 | 1.06  | 0.20 |
| META1_0376 | malonyl-CoA-[acyl-carrier-protein] transacylase            | 0.779 | 0.498 | 0.569 | 0.879 | 0.380 | 0.952 | 0.900 | 1.005 | 1.111 | 0.590 | 0.716 | 1.008 | 2.31  | 0.03 | 2.11  | 0.30 |
| META1_0377 | 3-oxoacyl-[acyl-carrier-protein] reductase                 | 0.973 | 0.589 | 0.742 | 1.014 | 0.499 | 1.276 | 0.836 | 0.870 | 0.635 | 0.735 | 0.907 | 0.780 | 1.43  | 0.89 | 1.29  | 0.73 |
| META1_0379 | 3-oxoacyl-[acyl-carrier-protein] synthase II               | 0.506 | 0.249 | 0.223 | 0.000 | 0.380 | 0.378 | 0.279 | 0.290 | 0.218 | 0.299 | 0.323 | 0.262 | 1.18  | 0.60 | 1.22  | 0.32 |
| META1_0380 | conserved protein of unknown function                      | 0.000 | 0.295 | 0.223 | 0.338 | 0.190 | 0.284 | 0.193 | 0.174 | 0.179 | 0.200 | 0.252 | 0.181 | 1.23  | 0.32 | 1.08  | 0.10 |
| META1_0384 | putative membrane protein, component of efflux syste       | 0.000 | 0.045 | 0.000 | 0.000 | 0.000 | 0.000 | 0.000 | 0.000 | 0.000 | 0.018 | 0.000 | 0.000 | 0.00  | 0.37 | n.d.  | n.d. |
| META1_0387 | D-xylulose 5-phosphate/D-fructose 6-phosphate phosph       | 0.117 | 0.181 | 0.173 | 0.000 | 0.000 | 0.000 | 0.000 | 0.000 | 0.000 | 0.163 | 0.000 | 0.000 | 0.00  | 0.00 | n.d.  | 0.00 |
| META1_0390 | D-sulfate/thiosulfate transporter subunit ; ATP-b          | 0.000 | 0.000 | 0.000 | 0.000 | 0.048 | 0.047 | 0.000 | 0.000 | 0.000 | 0.000 | 0.040 | 0.000 | n.d.  | n.d. | 0.00  | 0.12 |
| META1_0391 | ABC transporter, periplasmic protein precursor, putativ    | 1.674 | 1.133 | 0.940 | 1.217 | 0.428 | 0.331 | 0.364 | 0.445 | 0.357 | 1.188 | 0.504 | 0.390 | 0.44  | 0.00 | 1.16  | 0.42 |
| META1_0396 | putative flavin containing amine oxidase                   | 0.000 | 0.000 | 0.000 | 0.000 | 0.095 | 0.071 | 0.000 | 0.039 | 0.040 | 0.000 | 0.071 | 0.027 | n.d.  | 0.12 | 0.57  | 0.92 |
| META1_0397 | putative cyclic nucleotide-binding domain                  | 0.000 | 0.000 | 0.000 | 0.000 | 0.071 | 0.047 | 0.000 | 0.000 | 0.000 | 0.000 | 0.050 | 0.000 | n.d.  | n.d. | 0.00  | 0.12 |
| META1_0398 | protein of unknown function                                | 0.078 | 0.091 | 0.000 | 0.000 | 0.000 | 0.000 | 0.000 | 0.058 | 0.119 | 0.054 | 0.000 | 0.060 | 1.50  | 1.00 | n.d.  | 0.12 |
| META1_0403 | ABC transporter, periplasmic protein, putative sulfate/t   | 0.350 | 0.702 | 0.668 | 1.014 | 0.808 | 0.874 | 0.364 | 0.715 | 0.377 | 0.608 | 0.867 | 0.491 | 1.09  | 0.61 | 0.85  | 0.04 |
| META1_0405 | ABC transporter, permease, putative sulfate/thiosulfate    | 0.000 | 0.000 | 0.000 | 0.000 | 0.000 | 0.047 | 0.000 | 0.000 | 0.000 | 0.000 | 0.020 | 0.000 | n.d.  | n.d. | 0.00  | 0.37 |
| META1_0406 | ABC transporter, ATPase, putative sulfate/thiosulfate tr   | 0.000 | 0.204 | 0.049 | 0.203 | 0.736 | 0.614 | 0.407 | 0.329 | 0.258 | 0.100 | 0.605 | 0.329 | 4.45  | 0.57 | 0.82  | 0.48 |
| META1_0412 | phosphoribosylaminimidazole-succinocarboxamide sy          | 0.935 | 1.337 | 1.188 | 1.217 | 0.713 | 0.992 | 1.007 | 1.546 | 1.111 | 1.188 | 0.907 | 1.230 | 1.40  | 0.77 | 2.03  | 0.32 |
| META1_0414 | putative glycosyl transferase                              | 0.000 | 0.000 | 0.000 | 0.000 | 0.000 | 0.043 | 0.000 | 0.000 | 0.000 | 0.000 | 0.000 | 0.013 | n.d.  | 0.37 | n.d.  | 0.37 |
| META1_0416 | conserved protein of unknown function; putative export     | 0.156 | 0.181 | 0.297 | 0.744 | 0.285 | 0.236 | 0.064 | 0.271 | 0.111 | 0.218 | 0.333 | 0.155 | 0.96  | 0.37 | 0.70  | 0.12 |
| META1_0417 | protein of unknown function                                | 0.195 | 0.181 | 0.173 | 0.000 | 0.095 | 0.165 | 0.043 | 0.058 | 0.000 | 0.181 | 0.111 | 0.034 | 0.25  | 0.58 | 0.45  | 0.99 |
| META1_0419 | intracellular PHB depolymerase                             | 0.506 | 0.091 | 0.124 | 0.000 | 0.309 | 0.142 | 0.171 | 0.329 | 0.298 | 0.200 | 0.192 | 0.269 | 1.82  | 0.56 | 2.11  | 0.41 |
| META1_0420 | two component sensor histidine kinase, RegS                | 0.000 | 0.136 | 0.148 | 0.000 | 0.000 | 0.000 | 0.043 | 0.039 | 0.079 | 0.109 | 0.000 | 0.054 | 0.67  | 0.25 | n.d.  | 0.00 |
| META1_0421 | two-component transcriptional regulator RegR, Fis fam      | 0.078 | 0.159 | 0.074 | 0.203 | 0.143 | 0.331 | 0.257 | 0.348 | 0.238 | 0.109 | 0.232 | 0.282 | 3.50  | 0.02 | 1.83  | 0.38 |
| META1_0423 | Phosphoribosylformylglycinamide synthetase PurS            | 0.234 | 0.249 | 0.346 | 0.271 | 0.404 | 0.307 | 0.107 | 0.213 | 0.179 | 0.281 | 0.343 | 0.168 | 0.81  | 0.09 | 0.74  | 0.04 |
| META1_0424 | phosphoribosylformylglycinamide synthase I                 | 0.350 | 0.181 | 0.099 | 0.338 | 0.166 | 0.213 | 0.214 | 0.290 | 0.139 | 0.191 | 0.212 | 0.215 | 1.52  | 0.82 | 1.52  | 0.73 |
| META1_0425 | adenine phosphoribosyltransferase                          | 0.623 | 0.476 | 0.470 | 0.338 | 0.333 | 0.378 | 0.364 | 0.290 | 0.456 | 0.508 | 0.353 | 0.370 | 0.98  | 0.09 | 1.57  | 0.78 |
| META1_0426 | inositol monophosphatase                                   | 0.740 | 0.748 | 0.619 | 0.879 | 0.356 | 0.614 | 0.557 | 0.812 | 0.516 | 0.699 | 0.544 | 0.632 | 1.22  | 0.45 | 1.74  | 0.84 |
| META1_0427 | thiamine-phosphate pyrophosphorylase (TMP pyrophos         | 0.000 | 0.000 | 0.000 | 0.000 | 0.048 | 0.000 | 0.107 | 0.058 | 0.000 | 0.000 | 0.020 | 0.054 | n.d.  | 0.12 | 0.40  | 0.55 |
| META1_0428 | thiazole synthase                                          | 0.156 | 0.181 | 0.198 | 0.000 | 0.000 | 0.118 | 0.386 | 0.348 | 0.456 | 0.181 | 0.050 | 0.397 | 2.95  | 0.00 | 11.80 | 0.18 |
| META1_0430 | glycine oxidase                                            | 0.000 | 0.000 | 0.000 | 0.000 | 0.000 | 0.047 | 0.086 | 0.155 | 0.159 | 0.000 | 0.020 | 0.134 |       |      |       |      |

|            |                                                           |       |       |       |       |       |       |       |       |       |       |       |       |       |      |        |      |
|------------|-----------------------------------------------------------|-------|-------|-------|-------|-------|-------|-------|-------|-------|-------|-------|-------|-------|------|--------|------|
| META1_0558 | O-sialoglycoprotein endopectidase, with actin-like ATP    | 0.195 | 0.295 | 0.297 | 0.338 | 0.214 | 0.354 | 0.386 | 0.329 | 0.298 | 0.272 | 0.292 | 0.336 | 1.67  | 0.17 | 1.72   | 0.51 |
| META1_0559 | putative uroporphyrinogen III synthase                    | 0.000 | 0.000 | 0.000 | 0.000 | 0.000 | 0.000 | 0.000 | 0.000 | 0.040 | 0.000 | 0.000 | 0.013 | n.d.  | 0.37 | n.d.   | 0.37 |
| META1_0561 | conserved protein of unknown function; two putative n     | 2.025 | 1.903 | 2.351 | 1.894 | 1.520 | 1.630 | 1.907 | 1.527 | 1.191 | 2.096 | 1.623 | 1.532 | 0.99  | 0.10 | 1.42   | 0.54 |
| META1_0562 | conserved protein of unknown function; putative expos     | 1.558 | 1.292 | 1.188 | 1.217 | 0.831 | 0.567 | 0.664 | 0.580 | 0.734 | 1.315 | 0.776 | 0.659 | 0.68  | 0.00 | 1.27   | 0.36 |
| META1_0572 | putative chemoreceptor y4s (Methyl-accepting chemot       | 0.000 | 0.000 | 0.000 | 0.000 | 0.214 | 0.189 | 0.279 | 0.174 | 0.179 | 0.000 | 0.171 | 0.208 | n.d.  | 0.20 | 1.62   | 0.38 |
| META1_0573 | conserved protein of unknown function; putative ATP-d     | 0.000 | 0.227 | 0.223 | 0.000 | 0.190 | 0.142 | 0.257 | 0.271 | 0.218 | 0.172 | 0.249 | 0.195 | 0.39  | 2.64 | 0.47   | 0.44 |
| META1_0580 | ABC-type polysaccharide/polyol phosphate transport s      | 0.000 | 0.000 | 0.000 | 0.000 | 0.000 | 0.047 | 0.000 | 0.058 | 0.000 | 0.000 | 0.020 | 0.020 | n.d.  | 0.37 | 1.50   | 0.99 |
| META1_0581 | putative Capsule polysaccharide export inner-membran      | 0.000 | 0.000 | 0.049 | 0.000 | 0.119 | 0.142 | 0.000 | 0.039 | 0.000 | 0.018 | 0.111 | 0.013 | 1.00  | 0.99 | 0.18   | 0.60 |
| META1_0582 | conserved protein of unknown function                     | 0.078 | 0.091 | 0.049 | 0.000 | 0.000 | 0.000 | 0.043 | 0.000 | 0.040 | 0.073 | 0.000 | 0.027 | 0.50  | 0.45 | n.d.   | 0.12 |
| META1_0585 | putative methyl-accepting chemotaxis receptor/sens        | 0.000 | 0.000 | 0.000 | 0.000 | 0.214 | 0.000 | 0.107 | 0.097 | 0.119 | 0.000 | 0.091 | 0.108 | n.d.  | 0.00 | 1.78   | 0.09 |
| META1_0588 | conserved protein of unknown function, putative flagel    | 0.000 | 0.045 | 0.000 | 0.135 | 0.214 | 0.095 | 0.150 | 0.135 | 0.278 | 0.018 | 0.151 | 0.188 | 14.00 | 0.19 | 1.87   | 0.50 |
| META1_0590 | Cell cycle transcriptional regulator ctrA (Response regul | 0.078 | 0.204 | 0.173 | 0.338 | 0.309 | 0.449 | 0.450 | 0.425 | 0.258 | 0.163 | 0.373 | 0.186 | 3.11  | 0.05 | 1.51   | 0.94 |
| META1_0592 | conserved protein of unknown function                     | 0.000 | 0.136 | 0.198 | 0.271 | 0.071 | 0.118 | 0.129 | 0.135 | 0.179 | 0.127 | 0.121 | 0.148 | 1.57  | 0.36 | 1.83   | 0.81 |
| META1_0594 | NAD-dependent malic enzyme                                | 4.711 | 5.801 | 5.345 | 1.488 | 1.568 | 1.465 | 2.528 | 2.551 | 1.965 | 5.380 | 1.512 | 2.345 | 0.59  | 0.00 | 2.33   | 0.01 |
| META1_0597 | protein of unknown function                               | 0.000 | 0.068 | 0.074 | 0.000 | 0.000 | 0.047 | 0.043 | 0.058 | 0.119 | 0.054 | 0.020 | 0.074 | 1.83  | 0.37 | 5.50   | 0.13 |
| META1_0598 | putative glycosyl transferase                             | 0.000 | 0.045 | 0.049 | 0.000 | 0.095 | 0.000 | 0.107 | 0.097 | 0.079 | 0.036 | 0.040 | 0.094 | 3.50  | 0.47 | 3.50   | 0.12 |
| META1_0599 | protein of unknown function                               | 0.000 | 0.000 | 0.099 | 0.000 | 0.000 | 0.071 | 0.064 | 0.097 | 0.000 | 0.036 | 0.030 | 0.054 | 2.00  | 0.50 | 2.67   | 0.53 |
| META1_0600 | protein of unknown function                               | 0.000 | 0.000 | 0.049 | 0.000 | 0.000 | 0.000 | 0.000 | 0.058 | 0.000 | 0.018 | 0.000 | 0.020 | 1.50  | 0.99 | n.d.   | 0.37 |
| META1_0601 | peptidase                                                 | 0.584 | 0.612 | 0.520 | 0.203 | 0.641 | 0.449 | 0.321 | 0.387 | 0.278 | 0.572 | 0.494 | 0.329 | 0.78  | 0.01 | 1.00   | 0.65 |
| META1_0603 | oxidoreductase, FAD-binding subunit; putative molybd      | 0.000 | 0.476 | 0.148 | 0.000 | 0.214 | 0.213 | 0.214 | 0.174 | 0.139 | 0.245 | 0.181 | 0.175 | 0.96  | 0.32 | 1.44   | 0.34 |
| META1_0604 | oxidoreductase, molybdopterin-binding subunit             | 0.000 | 0.453 | 0.124 | 0.000 | 0.166 | 0.142 | 0.279 | 0.251 | 0.159 | 0.227 | 0.131 | 0.238 | 1.36  | 0.37 | 2.62   | 0.43 |
| META1_0610 | Putative transcriptional regulator, MarR family           | 0.000 | 0.000 | 0.000 | 0.000 | 0.000 | 0.000 | 0.043 | 0.039 | 0.000 | 0.000 | 0.000 | 0.027 | n.d.  | 0.12 | n.d.   | 0.12 |
| META1_0611 | putative glycosyl transferase                             | 0.000 | 0.000 | 0.000 | 0.000 | 0.071 | 0.071 | 0.000 | 0.039 | 0.000 | 0.000 | 0.060 | 0.013 | n.d.  | 0.37 | 0.33   | 0.56 |
| META1_0612 | alpha-D-glucose-1-phosphate cytidylyltransferase          | 0.000 | 0.113 | 0.099 | 0.000 | 0.048 | 0.095 | 0.129 | 0.174 | 0.040 | 0.082 | 0.060 | 0.114 | 1.89  | 0.37 | 2.83   | 0.43 |
| META1_0613 | cdp-glucose 4,6-dehydratase                               | 0.000 | 0.091 | 0.074 | 0.000 | 0.143 | 0.165 | 0.043 | 0.077 | 0.060 | 0.064 | 0.131 | 0.060 | 1.29  | 0.33 | 0.69   | 0.25 |
| META1_0614 | putative Methyltransferase                                | 0.117 | 0.113 | 0.099 | 0.000 | 0.166 | 0.142 | 0.150 | 0.116 | 0.119 | 0.109 | 0.131 | 0.128 | 1.58  | 0.19 | 1.46   | 0.35 |
| META1_0615 | dTDP-4-dehydrohamose 3,5-epimerase                        | 0.000 | 0.000 | 0.000 | 0.000 | 0.000 | 0.000 | 0.043 | 0.000 | 0.060 | 0.000 | 0.000 | 0.034 | n.d.  | 0.12 | n.d.   | 0.12 |
| META1_0616 | putative CDP-4-dehydro-6-deoxy-D-glucose 4-reductase      | 0.000 | 0.000 | 0.000 | 0.000 | 0.000 | 0.000 | 0.043 | 0.000 | 0.040 | 0.000 | 0.000 | 0.027 | n.d.  | 0.12 | n.d.   | 0.12 |
| META1_0617 | Putative response regulator receptor                      | 0.000 | 0.204 | 0.099 | 0.000 | 0.048 | 0.000 | 0.064 | 0.058 | 0.060 | 0.118 | 0.020 | 0.060 | 0.69  | 0.27 | 4.50   | 0.13 |
| META1_0619 | 7,8-diaminopropylarginine synthetase, PIP-dependent       | 0.000 | 0.000 | 0.000 | 0.000 | 0.095 | 0.118 | 0.064 | 0.039 | 0.000 | 0.000 | 0.091 | 0.000 | n.d.  | 0.12 | 0.56   | 0.92 |
| META1_0620 | glycine decarboxylase, PIP-dependent, subunit (prote      | 4.361 | 3.082 | 4.083 | 0.000 | 0.190 | 0.142 | 4.477 | 4.136 | 3.731 | 3.747 | 0.141 | 4.106 | 1.48  | 0.55 | 43.64  | 0.37 |
| META1_0622 | glycine cleavage complex protein T, aminomethyltransf     | 0.389 | 1.110 | 1.410 | 0.203 | 0.000 | 0.000 | 2.399 | 1.933 | 2.243 | 1.052 | 0.030 | 2.184 | 2.80  | 0.08 | 108.33 | 0.31 |
| META1_0624 | 7-keto-8-aminopropylarginine synthetase (8-amino-7-k      | 0.000 | 0.000 | 0.000 | 0.000 | 0.143 | 0.165 | 0.129 | 0.116 | 0.119 | 0.000 | 0.131 | 0.121 | n.d.  | 0.00 | 1.38   | 0.34 |
| META1_0625 | conserved protein of unknown function; putative NUP       | 0.000 | 0.000 | 0.000 | 0.000 | 0.000 | 0.047 | 0.064 | 0.058 | 0.079 | 0.000 | 0.020 | 0.067 | n.d.  | 0.00 | 5.00   | 0.13 |
| META1_0626 | conserved protein of unknown function                     | 0.000 | 0.000 | 0.000 | 0.000 | 0.000 | 0.000 | 0.043 | 0.000 | 0.000 | 0.000 | 0.000 | 0.013 | n.d.  | 0.37 | n.d.   | 0.37 |
| META1_0629 | MxaR-like protein, an ATPase                              | 0.000 | 0.091 | 0.074 | 0.203 | 0.428 | 0.331 | 0.364 | 0.329 | 0.377 | 0.064 | 0.353 | 0.356 | 7.57  | 0.62 | 1.51   | 0.53 |
| META1_0630 | conserved protein of unknown function                     | 0.000 | 0.000 | 0.000 | 0.000 | 0.000 | 0.000 | 0.064 | 0.077 | 0.079 | 0.000 | 0.000 | 0.074 | n.d.  | 0.00 | n.d.   | 0.00 |
| META1_0631 | conserved protein of unknown function                     | 0.000 | 0.000 | 0.000 | 0.000 | 0.048 | 0.047 | 0.000 | 0.000 | 0.000 | 0.000 | 0.040 | 0.000 | n.d.  | n.d. | 0.00   | 0.12 |
| META1_0632 | conserved protein of unknown function containing a vo     | 0.000 | 0.000 | 0.000 | 0.000 | 0.000 | 0.000 | 0.000 | 0.000 | 0.040 | 0.000 | 0.000 | 0.013 | n.d.  | 0.37 | n.d.   | 0.37 |
| META1_0639 | conserved protein of unknown function                     | 0.273 | 0.340 | 0.322 | 0.000 | 0.000 | 0.071 | 0.000 | 0.000 | 0.000 | 0.318 | 0.030 | 0.000 | 0.00  | 0.00 | 0.00   | 0.37 |
| META1_0640 | protein of unknown function                               | 0.973 | 0.838 | 0.940 | 0.609 | 0.618 | 0.662 | 0.686 | 0.522 | 0.556 | 0.907 | 0.635 | 0.585 | 0.87  | 0.01 | 1.38   | 0.44 |
| META1_0641 | methionine sulfoxide reductase (Peptide- methionine E     | 0.000 | 0.045 | 0.000 | 0.000 | 0.000 | 0.000 | 0.000 | 0.058 | 0.000 | 0.018 | 0.000 | 0.020 | 1.50  | 0.99 | n.d.   | 0.37 |
| META1_0643 | putative SENSOR1 TRANSDUCTION HISTIDINE KINASE of         | 0.000 | 0.095 | 0.000 | 0.000 | 0.303 | 0.284 | 0.236 | 0.213 | 0.337 | 0.000 | 0.252 | 0.262 | 6.30  | 0.12 | 1.56   | 0.92 |
| META1_0644 | malonyl CoA synthetase                                    | 0.467 | 0.816 | 0.643 | 0.135 | 0.641 | 0.614 | 0.578 | 0.677 | 0.695 | 0.671 | 0.554 | 0.652 | 1.31  | 0.85 | 1.76   | 0.35 |
| META1_0646 | protein of unknown function; putative exported protei     | 0.273 | 0.227 | 0.223 | 0.473 | 0.380 | 0.284 | 0.236 | 0.232 | 0.159 | 0.236 | 0.353 | 0.208 | 1.19  | 0.35 | 0.89   | 0.04 |
| META1_0647 | conserved protein of unknown function; putative FAD/N     | 0.000 | 0.000 | 0.000 | 0.000 | 0.000 | 0.071 | 0.000 | 0.000 | 0.000 | 0.000 | 0.030 | 0.000 | n.d.  | n.d. | 0.00   | 0.37 |
| META1_0650 | General stress protein, putative intracellular proteinase | 0.195 | 0.091 | 0.000 | 0.000 | 0.000 | 0.000 | 0.000 | 0.000 | 0.000 | 0.082 | 0.000 | 0.000 | 0.00  | 0.12 | n.d.   | n.d. |
| META1_0652 | conserved protein of unknown function; putative mem       | 0.312 | 0.000 | 0.000 | 0.000 | 0.071 | 0.095 | 0.000 | 0.039 | 0.040 | 0.073 | 0.071 | 0.027 | 0.50  | 0.40 | 0.57   | 0.92 |
| META1_0653 | protein of unknown function                               | 0.000 | 0.113 | 0.099 | 0.000 | 0.048 | 0.000 | 0.000 | 0.000 | 0.000 | 0.082 | 0.020 | 0.000 | 0.00  | 0.12 | 0.00   | 0.37 |
| META1_0654 | major cold shock protein                                  | 0.389 | 0.453 | 0.371 | 0.609 | 0.261 | 0.236 | 0.428 | 0.309 | 0.734 | 0.408 | 0.302 | 0.491 | 1.62  | 0.64 | 2.43   | 0.46 |
| META1_0656 | conserved protein of unknown function                     | 0.000 | 0.000 | 0.000 | 0.000 | 0.000 | 0.000 | 0.043 | 0.000 | 0.000 | 0.000 | 0.000 | 0.013 | n.d.  | 0.37 | n.d.   | 0.37 |
| META1_0657 | conserved protein of unknown function                     | 0.000 | 0.000 | 0.000 | 0.000 | 0.119 | 0.047 | 0.043 | 0.077 | 0.099 | 0.000 | 0.071 | 0.074 | n.d.  | 0.00 | 1.57   | 0.37 |
| META1_0659 | Putative ABC transporter, permease                        | 0.000 | 0.068 | 0.099 | 0.000 | 0.000 | 0.071 | 0.000 | 0.000 | 0.000 | 0.064 | 0.030 | 0.000 | 0.00  | 0.12 | 0.00   | 0.37 |
| META1_0660 | putative ABC transporter, ATPase                          | 0.000 | 0.000 | 0.049 | 0.000 | 0.000 | 0.000 | 0.000 | 0.058 | 0.079 | 0.018 | 0.000 | 0.047 | 3.50  | 0.54 | n.d.   | 0.12 |
| META1_0661 | putative ABC transporter, periplasmic protein             | 0.000 | 0.113 | 0.074 | 0.135 | 0.166 | 0.260 | 0.064 | 0.077 | 0.091 | 0.013 | 0.202 | 0.081 | 1.50  | 0.35 | 0.60   | 0.02 |
| META1_0662 | putative uncharacterized ABC transporter auxiliary com    | 0.000 | 0.000 | 0.049 | 0.000 | 0.190 | 0.095 | 0.064 | 0.000 | 0.060 | 0.018 | 0.121 | 0.040 | 3.00  | 0.53 | 0.50   | 0.91 |
| META1_0667 | protein of unknown function precursor; putative expo      | 0.000 | 0.068 | 0.074 | 0.203 | 0.166 | 0.118 | 0.107 | 0.135 | 0.159 | 0.054 | 0.151 | 0.134 | 3.33  | 0.47 | 1.33   | 0.40 |
| META1_0669 | conserved protein of unknown function                     | 0.117 | 0.113 | 0.148 | 0.135 | 0.143 | 0.142 | 0.171 | 0.232 | 0.139 | 0.127 | 0.141 | 0.181 | 1.93  | 0.12 | 1.93   | 0.19 |
| META1_0670 | putative L-asparaginase (ansA-like)                       | 0.195 | 0.159 | 0.148 | 0.135 | 0.285 | 0.378 | 0.171 | 0.213 | 0.179 | 0.163 | 0.302 | 0.188 | 1.56  | 0.33 | 0.93   | 0.44 |
| META1_0671 | gamma-glutamylcysteine synthetase                         | 0.000 | 0.045 | 0.124 | 0.000 | 0.190 | 0.213 | 0.193 | 0.271 | 0.218 | 0.064 | 0.171 | 0.228 | 4.86  | 0.55 | 2.00   | 0.39 |
| META1_0674 | putative NUDIX hydrolase                                  | 0.000 | 0.000 | 0.099 | 0.135 | 0.095 | 0.071 | 0.107 | 0.039 | 0.079 | 0.036 | 0.091 | 0.074 | 2.75  | 0.10 | 1.22   | 0.39 |
| META1_0676 | conserved protein of unknown function                     | 0.156 | 0.204 | 0.148 | 0.000 | 0.190 | 0.000 | 0.000 | 0.000 | 0.119 | 0.172 | 0.081 | 0.040 | 0.32  | 0.13 | 0.75   | 0.97 |
| META1_0677 | protein of unknown function; putative exported protei     | 0.000 | 0.000 | 0.049 | 0.000 | 0.000 | 0.000 | 0.000 | 0.000 | 0.000 | 0.018 | 0.000 | 0.000 | 0.00  | 0.37 | n.d.   | n.d. |
| META1_0678 | conserved protein of unknown function; putative mem       | 0.117 | 0.000 | 0.000 | 0.000 | 0.190 | 0.142 | 0.086 | 0.077 | 0.119 | 0.027 | 0.141 | 0.094 | 4.67  | 0.11 | 1.00   | 0.30 |
| META1_0681 | Cobalamin synthase                                        | 0.000 | 0.045 | 0.000 | 0.000 | 0.095 | 0.047 | 0.043 | 0.058 | 0.040 | 0.018 | 0.060 | 0.047 | 3.50  | 0.12 | 1.17   | 0.33 |
| META1_0682 | Nicotinate-nucleotide-dimethylbenzimidazole phosph        | 0.117 | 0.113 | 0.148 | 0.271 | 0.451 | 0.354 | 0.150 | 0.174 | 0.218 | 0.127 | 0.383 | 0.181 | 1.93  | 0.06 | 0.71   | 0.02 |
| META1_0686 | putative sensory histidine kinase, putative methyltransf  | 0.000 | 0.045 | 0.000 | 0.000 |       |       |       |       |       |       |       |       |       |      |        |      |

|            |                                                            |       |       |       |       |       |       |       |       |       |       |       |       |       |      |      |      |
|------------|------------------------------------------------------------|-------|-------|-------|-------|-------|-------|-------|-------|-------|-------|-------|-------|-------|------|------|------|
| META1_0775 | conserved protein of unknown function; putative export     | 0.078 | 0.068 | 0.049 | 0.000 | 0.000 | 0.000 | 0.000 | 0.000 | 0.064 | 0.000 | 0.000 | 0.00  | 0.00  | n.d. | n.d. |      |
| META1_0776 | adenylosuccinate synthetase                                | 1.830 | 1.835 | 1.757 | 1.014 | 1.188 | 1.370 | 1.050 | 1.218 | 0.834 | 1.805 | 1.240 | 1.035 | 0.77  | 0.01 | 1.25 | 0.36 |
| META1_0777 | conserved protein of unknown function                      | 0.117 | 0.453 | 0.495 | 0.541 | 0.285 | 0.260 | 0.300 | 0.213 | 0.218 | 0.390 | 0.312 | 0.242 | 0.84  | 0.68 | 1.16 | 0.24 |
| META1_0778 | RNA polymerase sigma-32 (sigma H) factor                   | 0.000 | 0.159 | 0.173 | 0.000 | 0.309 | 0.165 | 0.236 | 0.116 | 0.179 | 0.127 | 0.202 | 0.175 | 1.86  | 0.38 | 1.30 | 0.33 |
| META1_0779 | putative diguanylate cyclase/phosphodiesterase, GGDE       | 0.000 | 0.000 | 0.074 | 0.000 | 0.048 | 0.000 | 0.000 | 0.000 | 0.000 | 0.027 | 0.020 | 0.000 | 0.00  | 0.37 | 0.00 | 0.37 |
| META1_0783 | ribosomal large subunit pseudouridine synthase D [Pse]     | 0.000 | 0.000 | 0.000 | 0.000 | 0.071 | 0.142 | 0.086 | 0.077 | 0.040 | 0.007 | 0.091 | 0.067 | n.d.  | 0.00 | 1.11 | 0.32 |
| META1_0788 | Peptidase M23B                                             | 0.000 | 0.000 | 0.000 | 0.000 | 0.048 | 0.047 | 0.000 | 0.000 | 0.000 | 0.000 | 0.040 | 0.000 | n.d.  | n.d. | 0.00 | 0.12 |
| META1_0790 | putative glutamyl-tRNA synthetase                          | 0.000 | 0.000 | 0.000 | 0.000 | 0.000 | 0.000 | 0.000 | 0.039 | 0.000 | 0.000 | 0.000 | 0.013 | n.d.  | 0.37 | n.d. | 0.37 |
| META1_0791 | protein of unknown function                                | 0.000 | 0.000 | 0.000 | 0.000 | 0.000 | 0.000 | 0.047 | 0.043 | 0.000 | 0.000 | 0.020 | 0.013 | n.d.  | 0.37 | 1.00 | 0.99 |
| META1_0793 | chaperone Hsp90, heat shock protein C 62.5                 | 4.244 | 5.189 | 5.988 | 4.802 | 5.677 | 4.749 | 4.585 | 4.368 | 4.168 | 5.262 | 5.151 | 4.368 | 1.12  | 0.21 | 1.27 | 0.08 |
| META1_0795 | putative gamma-glutamyltranspeptidase                      | 1.635 | 1.065 | 1.039 | 0.609 | 1.235 | 0.992 | 0.771 | 0.677 | 0.734 | 1.188 | 1.038 | 0.726 | 0.82  | 0.03 | 1.05 | 0.36 |
| META1_0796 | Dihydroxyacetone kinase (Glycerone kinase)                 | 0.078 | 0.566 | 0.668 | 0.271 | 0.143 | 0.165 | 0.171 | 0.232 | 0.119 | 0.490 | 0.171 | 0.175 | 0.48  | 0.44 | 1.53 | 0.73 |
| META1_0797 | Putative methyltransferase                                 | 0.584 | 0.544 | 0.322 | 0.473 | 0.071 | 0.213 | 0.236 | 0.232 | 0.337 | 0.472 | 0.192 | 0.269 | 0.77  | 0.06 | 2.11 | 0.61 |
| META1_0799 | Precorrin-6Y C(5,15)-methyltransferase [decarbonylatin     | 0.000 | 0.000 | 0.000 | 0.000 | 0.000 | 0.007 | 0.064 | 0.058 | 0.000 | 0.000 | 0.020 | 0.040 | n.d.  | 0.12 | 3.00 | 0.53 |
| META1_0800 | putative cobalamin biosynthesis protein                    | 0.000 | 0.000 | 0.049 | 0.000 | 0.000 | 0.000 | 0.000 | 0.000 | 0.000 | 0.018 | 0.000 | 0.000 | 0.00  | 0.37 | n.d. | n.d. |
| META1_0804 | Precorrin-4 C(11)-methyltransferase (Precorrin-3 methy     | 0.078 | 0.113 | 0.148 | 0.135 | 0.190 | 0.095 | 0.150 | 0.251 | 0.159 | 0.118 | 0.141 | 0.188 | 2.15  | 0.11 | 2.00 | 0.31 |
| META1_0805 | cobyrinic acid a,c-diamide synthase                        | 0.000 | 0.000 | 0.000 | 0.000 | 0.119 | 0.071 | 0.107 | 0.077 | 0.079 | 0.000 | 0.081 | 0.087 | n.d.  | 0.00 | 1.63 | 0.37 |
| META1_0806 | putative transcriptional regulator, XRE family             | 0.078 | 0.227 | 0.173 | 0.541 | 0.333 | 0.213 | 0.536 | 0.541 | 0.536 | 0.172 | 0.312 | 0.538 | 4.21  | 0.02 | 2.58 | 0.16 |
| META1_0807 | conserved protein of unknown function                      | 0.156 | 0.272 | 0.000 | 0.135 | 0.190 | 0.307 | 0.236 | 0.193 | 0.198 | 0.145 | 0.232 | 0.208 | 1.94  | 0.38 | 1.35 | 0.86 |
| META1_0810 | putative transcriptional regulator, Fur family; zinc uptak | 0.078 | 0.000 | 0.049 | 0.000 | 0.048 | 0.000 | 0.086 | 0.116 | 0.079 | 0.036 | 0.020 | 0.094 | 3.50  | 0.43 | 7.00 | 0.15 |
| META1_0813 | ABC transporter, ATP-binding protein                       | 0.000 | 0.045 | 0.000 | 0.000 | 0.119 | 0.095 | 0.064 | 0.058 | 0.060 | 0.018 | 0.091 | 0.060 | 4.50  | 0.13 | 1.00 | 0.30 |
| META1_0816 | DNA polymerase III, alpha subunit                          | 0.000 | 0.000 | 0.049 | 0.000 | 0.166 | 0.047 | 0.171 | 0.174 | 0.159 | 0.018 | 0.091 | 0.168 | 12.50 | 0.18 | 2.78 | 0.47 |
| META1_0817 | putative membrane bound lytic murein transglycosylas       | 1.207 | 1.156 | 0.841 | 1.894 | 0.736 | 1.087 | 0.964 | 1.121 | 0.933 | 1.052 | 1.058 | 1.008 | 12.59 | 0.71 | 1.43 | 0.65 |
| META1_0822 | DNA topoisomerase IV subunitA                              | 0.078 | 0.091 | 0.173 | 0.000 | 0.641 | 0.638 | 0.407 | 0.483 | 0.377 | 0.118 | 0.544 | 0.423 | 4.85  | 0.01 | 1.17 | 0.31 |
| META1_0823 | translation initiation factor if-1 (InfA)                  | 0.195 | 0.431 | 0.396 | 0.271 | 0.451 | 0.425 | 0.321 | 0.309 | 0.417 | 0.363 | 0.413 | 0.349 | 1.30  | 0.80 | 1.27 | 0.71 |
| META1_0826 | conserved protein of unknown function                      | 0.000 | 0.000 | 0.000 | 0.000 | 0.048 | 0.071 | 0.150 | 0.135 | 0.079 | 0.000 | 0.050 | 0.121 | n.d.  | 0.00 | 3.60 | 0.48 |
| META1_0827 | conserved protein of unknown function                      | 0.000 | 0.068 | 0.049 | 0.000 | 0.048 | 0.047 | 0.043 | 0.077 | 0.040 | 0.045 | 0.040 | 0.054 | 1.60  | 0.36 | 2.00 | 0.38 |
| META1_0830 | putative Formyl transferase (fmt-like)                     | 0.117 | 0.136 | 0.173 | 0.000 | 0.000 | 0.071 | 0.129 | 0.058 | 0.139 | 0.145 | 0.030 | 0.108 | 1.00  | 0.34 | 5.33 | 0.13 |
| META1_0834 | protein of unknown function; putative membrane prote       | 0.000 | 0.000 | 0.000 | 0.000 | 0.095 | 0.071 | 0.000 | 0.000 | 0.000 | 0.000 | 0.071 | 0.000 | n.d.  | n.d. | 0.00 | 0.12 |
| META1_0835 | outer membrane-specific lipoprotein transporter subun      | 0.078 | 0.317 | 0.322 | 0.271 | 0.214 | 0.254 | 0.450 | 0.367 | 0.238 | 0.263 | 0.282 | 0.349 | 1.79  | 0.35 | 1.86 | 0.41 |
| META1_0836 | putative Lipoprotein releasing system, transmembrane       | 0.061 | 0.136 | 0.148 | 0.000 | 0.119 | 0.189 | 0.054 | 0.097 | 0.000 | 0.109 | 0.131 | 0.054 | 0.67  | 0.93 | 0.62 | 0.93 |
| META1_0837 | proline-tRNA ligase                                        | 0.701 | 1.042 | 1.089 | 0.879 | 0.499 | 0.496 | 0.643 | 0.599 | 0.615 | 0.980 | 0.554 | 0.618 | 0.85  | 0.05 | 1.67 | 0.89 |
| META1_0839 | ethylmalonyl-CoA/methylmalonyl-CoA epimerase               | 0.234 | 0.408 | 0.322 | 0.338 | 0.238 | 0.331 | 0.214 | 0.232 | 0.298 | 0.336 | 0.292 | 0.249 | 1.00  | 0.27 | 1.28 | 0.27 |
| META1_0840 | putative hydrolase, metallo-beta-lactamase superfam        | 0.857 | 1.156 | 1.039 | 0.338 | 1.211 | 0.803 | 0.921 | 1.024 | 1.032 | 1.043 | 0.907 | 0.995 | 1.29  | 0.86 | 1.64 | 0.39 |
| META1_0841 | putative biotin-protein ligase (BirA-like)                 | 0.000 | 0.091 | 0.049 | 0.000 | 0.000 | 0.000 | 0.086 | 0.039 | 0.040 | 0.054 | 0.000 | 0.054 | 1.33  | 0.34 | n.d. | 0.00 |
| META1_0842 | NADH-quinone oxidoreductase chain N (NADH dehydro          | 0.000 | 0.000 | 0.000 | 0.000 | 0.071 | 0.000 | 0.000 | 0.039 | 0.000 | 0.000 | 0.030 | 0.013 | n.d.  | 0.37 | 0.67 | 0.97 |
| META1_0843 | NADH-quinone oxidoreductase chain M (NADH dehydro          | 0.000 | 0.181 | 0.124 | 0.000 | 0.071 | 0.165 | 0.129 | 0.135 | 0.159 | 0.118 | 0.101 | 0.141 | 1.62  | 0.36 | 2.10 | 0.41 |
| META1_0844 | NADH-quinone oxidoreductase chain L (NADH dehydro          | 0.195 | 0.544 | 0.470 | 0.338 | 0.451 | 0.473 | 0.450 | 0.290 | 0.298 | 0.435 | 0.443 | 0.343 | 1.06  | 0.83 | 1.16 | 0.31 |
| META1_0846 | NADH-quinone oxidoreductase chain J (NADH dehydro          | 0.312 | 0.363 | 0.223 | 0.000 | 0.190 | 0.213 | 0.536 | 0.367 | 0.576 | 0.299 | 0.171 | 0.491 | 2.21  | 0.07 | 4.29 | 0.53 |
| META1_0847 | NADH-quinone oxidoreductase subunit I (NADH dehydro        | 0.156 | 0.249 | 0.223 | 0.203 | 0.285 | 0.118 | 0.386 | 0.348 | 0.437 | 0.218 | 0.202 | 0.390 | 2.42  | 0.02 | 2.90 | 0.05 |
| META1_0849 | NADH-quinone oxidoreductase chain G (NADH dehydro          | 1.635 | 2.900 | 2.697 | 2.299 | 1.971 | 1.465 | 2.121 | 2.223 | 1.806 | 2.531 | 1.804 | 2.050 | 1.09  | 0.52 | 1.70 | 0.60 |
| META1_0850 | NADH-quinone oxidoreductase chain F (NADH dehydro          | 0.623 | 1.065 | 0.866 | 0.473 | 0.713 | 0.662 | 0.585 | 1.082 | 0.774 | 0.889 | 0.855 | 0.948 | 1.44  | 0.55 | 2.17 | 0.05 |
| META1_0851 | NADH-quinone oxidoreductase chain E (NADH dehydro          | 0.318 | 0.314 | 0.014 | 0.000 | 0.143 | 0.245 | 1.007 | 0.908 | 1.131 | 0.953 | 0.675 | 1.015 | 1.48  | 0.43 | 2.25 | 0.13 |
| META1_0852 | NADH-quinone oxidoreductase chain D (NADH dehydro          | 0.935 | 0.929 | 0.841 | 0.338 | 0.831 | 0.827 | 0.771 | 0.793 | 0.456 | 0.898 | 0.756 | 0.672 | 1.01  | 0.15 | 1.33 | 0.87 |
| META1_0853 | NADH-quinone oxidoreductase chain C (NADH dehydro          | 0.857 | 1.020 | 0.495 | 0.609 | 0.566 | 0.827 | 0.707 | 0.870 | 0.496 | 0.789 | 0.675 | 0.692 | 1.18  | 0.69 | 1.54 | 0.87 |
| META1_0854 | NADH-quinone oxidoreductase chain B (NADH dehydro          | 0.350 | 0.340 | 0.124 | 0.473 | 0.214 | 0.165 | 0.407 | 0.309 | 0.318 | 0.263 | 0.232 | 0.343 | 1.76  | 0.40 | 2.22 | 0.43 |
| META1_0856 | putative SCP-like extracellular protein                    | 0.000 | 0.000 | 0.000 | 0.000 | 0.000 | 0.047 | 0.000 | 0.000 | 0.000 | 0.000 | 0.020 | 0.000 | n.d.  | n.d. | 0.00 | 0.37 |
| META1_0857 | pseudourazurin                                             | 1.285 | 0.634 | 0.104 | 0.406 | 0.095 | 0.047 | 0.150 | 0.135 | 0.179 | 0.925 | 0.121 | 0.155 | 0.23  | 0.00 | 1.92 | 0.74 |
| META1_0858 | carbamoyl phosphate synthase, large subunit                | 1.713 | 2.243 | 2.920 | 4.937 | 3.967 | 3.355 | 3.085 | 2.938 | 3.453 | 2.368 | 3.850 | 3.159 | 0.80  | 0.10 | 1.23 | 0.11 |
| META1_0860 | protein of unknown function; putative exported protei      | 0.195 | 0.000 | 0.000 | 0.135 | 0.143 | 0.142 | 0.000 | 0.000 | 0.000 | 0.045 | 0.141 | 0.000 | 0.00  | 0.37 | 0.00 | 0.00 |
| META1_0861 | conserved protein of unknown function                      | 0.156 | 0.204 | 0.223 | 0.000 | 0.285 | 0.236 | 0.193 | 0.232 | 0.179 | 0.200 | 0.222 | 0.202 | 1.36  | 0.77 | 1.36 | 0.34 |
| META1_0863 | putative transcriptional regulator, LysR family            | 0.584 | 0.702 | 0.767 | 0.541 | 0.095 | 0.331 | 0.514 | 0.638 | 0.576 | 0.699 | 0.262 | 0.578 | 1.12  | 0.17 | 3.31 | 0.20 |
| META1_0864 | 3-dehydroquininate dehydratase (3-dehydroquininate) (Tyl   | 0.000 | 0.159 | 0.074 | 0.000 | 0.119 | 0.071 | 0.043 | 0.077 | 0.079 | 0.091 | 0.081 | 0.067 | 1.00  | 0.31 | 1.25 | 0.33 |
| META1_0865 | acetyl-CoA carboxylase, biotin carboxyl carrier protein s  | 0.000 | 0.159 | 0.074 | 0.203 | 0.333 | 0.354 | 0.214 | 0.271 | 0.298 | 0.091 | 0.323 | 0.262 | 3.90  | 0.52 | 1.22 | 0.62 |
| META1_0866 | acetyl-CoA carboxylase, biotin carboxylase subunit         | 0.584 | 0.476 | 0.406 | 0.406 | 0.665 | 0.685 | 0.514 | 0.522 | 0.456 | 0.535 | 0.635 | 0.497 | 1.25  | 0.33 | 1.17 | 0.48 |
| META1_0868 | putative transcriptional regulator, TetR family            | 0.000 | 0.068 | 0.000 | 0.000 | 0.143 | 0.142 | 0.043 | 0.077 | 0.060 | 0.027 | 0.142 | 0.060 | 3.00  | 0.12 | 0.75 | 0.43 |
| META1_0870 | conserved protein of unknown function; putative export     | 0.078 | 0.113 | 0.000 | 0.000 | 0.119 | 0.095 | 0.086 | 0.097 | 0.060 | 0.064 | 0.091 | 0.081 | 1.71  | 0.35 | 1.33 | 0.34 |
| META1_0871 | NADH:ubiquinone oxidoreductase 17.2 kD subunit             | 0.312 | 0.181 | 0.049 | 0.203 | 0.166 | 0.047 | 0.300 | 0.290 | 0.278 | 0.163 | 0.121 | 0.289 | 2.39  | 0.26 | 3.58 | 0.12 |
| META1_0872 | ribonucleoside-diphosphate reductase, adenylosuccinat      | 0.935 | 1.065 | 0.990 | 1.961 | 1.924 | 1.654 | 1.478 | 1.643 | 1.945 | 1.007 | 1.814 | 1.694 | 2.27  | 0.00 | 1.40 | 0.39 |
| META1_0887 | conserved protein of unknown function                      | 0.000 | 0.091 | 0.148 | 0.000 | 0.000 | 0.000 | 0.043 | 0.039 | 0.040 | 0.091 | 0.000 | 0.040 | 0.60  | 0.25 | n.d. | 0.00 |
| META1_0891 | conserved protein of unknown function                      | 0.000 | 0.000 | 0.000 | 0.000 | 0.071 | 0.000 | 0.064 | 0.039 | 0.000 | 0.000 | 0.030 | 0.034 | n.d.  | 0.12 | 1.67 | 0.50 |
| META1_0930 | transcriptional regulator, LysR family                     | 0.000 | 0.000 | 0.000 | 0.000 | 0.048 | 0.000 | 0.064 | 0.039 | 0.060 | 0.000 | 0.020 | 0.054 | n.d.  | 0.00 | 4.00 | 0.12 |
| META1_0938 | protein of unknown function                                | 0.000 | 0.000 | 0.000 | 0.000 | 0.000 | 0.000 | 0.000 | 0.039 | 0.060 | 0.000 | 0.000 | 0.034 | n.d.  | 0.12 | n.d. | 0.12 |
| META1_0943 | ABC transporter, ATPase                                    | 0.000 | 0.000 | 0.000 | 0.000 | 0.000 | 0.000 | 0.000 | 0.116 | 0.000 | 0.000 | 0.000 | 0.040 | n.d.  | 0.37 | n.d. | 0.37 |
| META1_0945 | ABC transporter, periplasmic protein                       | 0.000 | 0.091 | 0.000 | 0.000 | 0.000 | 0.000 | 0.071 | 0.097 | 0.198 | 0.036 | 0.000 | 0.155 | 5.75  | 0.14 | n.d. | 0.00 |
| META1_0946 | Acyl-CoA dehydrogenase                                     | 0.000 | 0.000 | 0.000 | 0.000 | 0.048 | 0.071 | 0.150 | 0.097 | 0.060 | 0.000 |       |       |       |      |      |      |

|            |                                                         |       |       |       |       |       |       |       |       |       |       |       |       |      |      |       |      |
|------------|---------------------------------------------------------|-------|-------|-------|-------|-------|-------|-------|-------|-------|-------|-------|-------|------|------|-------|------|
| META1_1076 | TonB-dependent outer membrane transporter associat      | 0.000 | 0.000 | 0.000 | 0.676 | 0.000 | 0.000 | 0.000 | 0.000 | 0.000 | 0.000 | 0.101 | 0.000 | n.d. | n.d. | 0.00  | 0.37 |
| META1_1077 | periplasmic binding protein associated to improved cob  | 0.078 | 0.136 | 0.074 | 1.623 | 0.261 | 0.142 | 0.386 | 0.309 | 0.179 | 0.100 | 0.413 | 0.289 | 3.91 | 0.02 | 1.05  | 0.68 |
| META1_1102 | Transcriptional regulator, LysR family                  | 0.000 | 0.045 | 0.000 | 0.000 | 0.000 | 0.000 | 0.003 | 0.000 | 0.000 | 0.018 | 0.000 | 0.013 | 1.00 | 1.00 | n.d.  | 0.37 |
| META1_1103 | short-chain dehydrogenase/reductase                     | 0.117 | 0.227 | 0.148 | 0.000 | 0.071 | 0.000 | 0.107 | 0.116 | 0.139 | 0.172 | 0.030 | 0.121 | 0.95 | 0.26 | 6.00  | 0.14 |
| META1_1109 | conserved protein of unknown function precursor         | 0.312 | 0.453 | 0.246 | 0.609 | 0.000 | 0.142 | 0.279 | 0.232 | 0.298 | 0.381 | 0.232 | 0.269 | 0.95 | 0.08 | 1.74  | 0.91 |
| META1_1116 | phosphoglyceromutase                                    | 0.000 | 0.000 | 0.000 | 0.135 | 0.095 | 0.071 | 0.086 | 0.174 | 0.079 | 0.000 | 0.091 | 0.114 | n.d. | 0.00 | 1.89  | 0.79 |
| META1_1122 | putative short-chain dehydrogenase/reductase SDR        | 0.000 | 0.068 | 0.000 | 0.000 | 0.000 | 0.000 | 0.000 | 0.097 | 0.000 | 0.027 | 0.000 | 0.034 | 1.67 | 0.98 | n.d.  | 0.37 |
| META1_1123 | conserved protein of unknown function                   | 0.000 | 0.091 | 0.099 | 0.000 | 0.000 | 0.000 | 0.000 | 0.000 | 0.000 | 0.073 | 0.000 | 0.000 | 0.00 | 0.12 | n.d.  | n.d. |
| META1_1124 | protein of unknown function                             | 0.000 | 0.000 | 0.000 | 0.000 | 0.000 | 0.000 | 0.000 | 0.039 | 0.040 | 0.000 | 0.000 | 0.027 | n.d. | 0.12 | n.d.  | 0.12 |
| META1_1132 | putative tRNA delta(2)-isopentenylpyrophosphate trans   | 0.117 | 0.000 | 0.049 | 0.000 | 0.000 | 0.047 | 0.064 | 0.058 | 0.000 | 0.045 | 0.020 | 0.040 | 1.20 | 0.98 | 3.00  | 0.53 |
| META1_1135 | conserved protein of unknown function; putative export  | 0.000 | 0.000 | 0.000 | 0.000 | 0.048 | 0.000 | 0.000 | 0.058 | 0.040 | 0.000 | 0.020 | 0.034 | n.d. | 0.12 | 2.50  | 0.52 |
| META1_1136 | conserved protein of unknown function; putative export  | 0.156 | 0.113 | 0.272 | 0.000 | 0.214 | 0.260 | 0.064 | 0.116 | 0.079 | 0.181 | 0.202 | 0.087 | 0.65 | 0.09 | 0.65  | 0.24 |
| META1_1137 | Putative cytochrome c550                                | 0.195 | 0.204 | 0.198 | 0.338 | 0.071 | 0.071 | 0.171 | 0.213 | 0.198 | 0.200 | 0.111 | 0.195 | 1.32 | 0.69 | 2.64  | 0.41 |
| META1_1138 | conserved protein of unknown function, periplasmic bi   | 0.701 | 0.657 | 0.718 | 0.473 | 0.238 | 0.402 | 0.150 | 0.425 | 0.337 | 0.689 | 0.343 | 0.309 | 0.61 | 0.05 | 1.35  | 0.55 |
| META1_1139 | Quinoprotein ethanol dehydrogenase precursor (QEDH)     | 0.156 | 0.068 | 0.445 | 0.000 | 0.333 | 0.189 | 0.214 | 0.271 | 0.238 | 0.227 | 0.222 | 0.242 | 1.44 | 0.55 | 1.64  | 0.37 |
| META1_1141 | protein of unknown function                             | 0.000 | 0.000 | 0.000 | 0.000 | 0.000 | 0.000 | 0.000 | 0.000 | 0.060 | 0.000 | 0.000 | 0.020 | n.d. | 0.37 | n.d.  | 0.37 |
| META1_1142 | conserved protein of unknown function                   | 0.000 | 0.000 | 0.000 | 0.000 | 0.000 | 0.000 | 0.000 | 0.039 | 0.000 | 0.000 | 0.000 | 0.013 | n.d. | 0.37 | n.d.  | 0.37 |
| META1_1145 | protein of unknown function; putative exported protein  | 0.078 | 0.136 | 0.173 | 0.000 | 0.095 | 0.000 | 0.000 | 0.000 | 0.000 | 0.136 | 0.040 | 0.000 | 0.00 | 0.00 | 0.00  | 0.37 |
| META1_1149 | putative peptidase                                      | 0.000 | 0.068 | 0.223 | 0.000 | 0.119 | 0.000 | 0.000 | 0.097 | 0.099 | 0.109 | 0.050 | 0.067 | 0.83 | 0.97 | 2.00  | 0.51 |
| META1_1151 | conserved protein of unknown function, Cupin barrel do  | 0.000 | 0.045 | 0.000 | 0.000 | 0.000 | 0.000 | 0.000 | 0.000 | 0.000 | 0.018 | 0.000 | 0.000 | 0.00 | 0.37 | n.d.  | n.d. |
| META1_1152 | Short-chain dehydrogenase/reductase SDR                 | 0.000 | 0.045 | 0.074 | 0.000 | 0.000 | 0.000 | 0.000 | 0.000 | 0.040 | 0.045 | 0.000 | 0.013 | 0.40 | 0.54 | n.d.  | 0.37 |
| META1_1154 | conserved protein of unknown function                   | 0.000 | 0.136 | 0.099 | 0.000 | 0.000 | 0.071 | 0.086 | 0.077 | 0.079 | 0.091 | 0.030 | 0.081 | 1.20 | 0.33 | 4.00  | 0.12 |
| META1_1155 | conserved protein of unknown function, putative univer  | 0.389 | 0.612 | 0.520 | 0.000 | 0.000 | 0.118 | 0.257 | 0.135 | 0.119 | 0.526 | 0.050 | 0.168 | 0.43 | 0.01 | 5.00  | 0.13 |
| META1_1156 | putative cytochrome c, class I                          | 0.000 | 0.159 | 0.099 | 0.000 | 0.095 | 0.071 | 0.043 | 0.000 | 0.060 | 0.100 | 0.071 | 0.034 | 0.45 | 0.90 | 0.71  | 0.95 |
| META1_1157 | transcriptional regulator, Crp/Fnr family               | 0.078 | 0.272 | 0.198 | 0.135 | 0.000 | 0.142 | 0.150 | 0.193 | 0.159 | 0.200 | 0.081 | 0.168 | 1.14 | 0.94 | 3.13  | 0.40 |
| META1_1160 | cytochrome d terminal oxidase, polypeptide subunit I    | 0.078 | 0.408 | 0.322 | 0.000 | 0.095 | 0.142 | 0.043 | 0.116 | 0.060 | 0.299 | 0.101 | 0.074 | 0.33 | 0.12 | 1.10  | 0.30 |
| META1_1163 | transcriptional regulator, DeoR family                  | 0.000 | 0.000 | 0.000 | 0.000 | 0.048 | 0.000 | 0.000 | 0.077 | 0.000 | 0.000 | 0.020 | 0.027 | n.d. | 0.37 | 2.00  | 0.97 |
| META1_1167 | Cellulose synthase (UDP-forming)                        | 0.000 | 0.000 | 0.000 | 0.000 | 0.000 | 0.000 | 0.000 | 0.000 | 0.040 | 0.000 | 0.000 | 0.013 | n.d. | 0.37 | n.d.  | 0.37 |
| META1_1169 | Putative cellulase, endoglucanase (celC)                | 0.000 | 0.113 | 0.000 | 0.000 | 0.048 | 0.000 | 0.000 | 0.000 | 0.000 | 0.045 | 0.020 | 0.000 | 0.00 | 0.37 | 0.00  | 0.37 |
| META1_1170 | Conserved protein of unknown function; putative export  | 0.000 | 0.045 | 0.099 | 0.000 | 0.071 | 0.000 | 0.000 | 0.000 | 0.000 | 0.054 | 0.030 | 0.000 | 0.00 | 0.12 | 0.00  | 0.37 |
| META1_1175 | putative NADH dehydrogenase (ubiquinone) I alpha subu   | 1.869 | 2.379 | 1.955 | 1.488 | 1.496 | 1.677 | 1.521 | 1.237 | 1.310 | 2.105 | 1.572 | 1.351 | 0.87 | 0.01 | 1.29  | 0.13 |
| META1_1178 | Primosome factor N' (replication factor Y)              | 0.000 | 0.091 | 0.124 | 0.000 | 0.143 | 0.165 | 0.236 | 0.116 | 0.099 | 0.082 | 0.131 | 0.148 | 2.44 | 0.42 | 1.69  | 0.36 |
| META1_1179 | conserved protein of unknown function                   | 0.506 | 0.634 | 0.693 | 0.609 | 0.665 | 0.638 | 0.664 | 0.406 | 0.536 | 0.626 | 0.645 | 0.531 | 1.14 | 0.45 | 1.23  | 0.25 |
| META1_1186 | Short-chain dehydrogenase/reductase SDR                 | 0.000 | 0.068 | 0.000 | 0.000 | 0.000 | 0.000 | 0.000 | 0.000 | 0.000 | 0.027 | 0.000 | 0.000 | 0.00 | 0.37 | n.d.  | n.d. |
| META1_1189 | putative ubiquinone biosynthesis protein                | 0.000 | 0.363 | 0.272 | 0.271 | 0.238 | 0.260 | 0.321 | 0.271 | 0.337 | 0.245 | 0.252 | 0.309 | 1.70 | 0.37 | 1.84  | 0.07 |
| META1_1201 | putative thioredoxin domain protein precursor           | 0.000 | 0.000 | 0.000 | 0.000 | 0.071 | 0.071 | 0.000 | 0.000 | 0.000 | 0.000 | 0.060 | 0.000 | n.d. | n.d. | 0.00  | 0.12 |
| META1_1203 | conserved protein of unknown function; putative export  | 0.078 | 0.181 | 0.000 | 0.135 | 0.143 | 0.095 | 0.000 | 0.077 | 0.099 | 0.091 | 0.121 | 0.060 | 0.90 | 0.96 | 0.75  | 0.42 |
| META1_1207 | beta-lactamase domain protein, putative hydroxycarboxyl | 0.000 | 0.045 | 0.074 | 0.000 | 0.071 | 0.071 | 0.086 | 0.097 | 0.060 | 0.045 | 0.060 | 0.081 | 2.40 | 0.42 | 2.00  | 0.39 |
| META1_1208 | rhodanese domain protein, putative sulfur transferase   | 0.000 | 0.045 | 0.000 | 0.000 | 0.095 | 0.189 | 0.129 | 0.077 | 0.099 | 0.018 | 0.121 | 0.101 | 0.75 | 0.15 | 1.25  | 0.33 |
| META1_1224 | Putative oxidoreductase, molybdopterin binding subunit  | 0.156 | 0.295 | 0.297 | 0.000 | 0.095 | 0.071 | 0.086 | 0.097 | 0.040 | 0.263 | 0.071 | 0.074 | 0.38 | 0.02 | 1.57  | 0.35 |
| META1_1225 | putative sulfite:cytochrome c oxidoreductase subunit B  | 0.000 | 0.181 | 0.124 | 0.000 | 0.071 | 0.047 | 0.000 | 0.000 | 0.000 | 0.118 | 0.050 | 0.000 | 0.00 | 0.12 | 0.00  | 0.12 |
| META1_1226 | conserved protein of unknown function                   | 0.156 | 0.363 | 0.223 | 0.000 | 0.048 | 0.142 | 0.343 | 0.309 | 0.198 | 0.263 | 0.081 | 0.282 | 1.45 | 0.59 | 5.25  | 0.58 |
| META1_1229 | Transcriptional regulator, LysR family                  | 0.000 | 0.045 | 0.000 | 0.000 | 0.000 | 0.000 | 0.000 | 0.000 | 0.013 | 0.018 | 0.000 | 0.000 | 0.00 | 0.37 | n.d.  | 0.37 |
| META1_1231 | conserved protein of unknown function                   | 0.000 | 0.000 | 0.049 | 0.000 | 0.000 | 0.000 | 0.000 | 0.000 | 0.000 | 0.018 | 0.000 | 0.000 | 0.00 | 0.37 | n.d.  | n.d. |
| META1_1233 | conserved protein of unknown function                   | 0.000 | 0.000 | 0.000 | 0.000 | 0.000 | 0.047 | 0.193 | 0.135 | 0.099 | 0.000 | 0.020 | 0.141 | n.d. | 0.00 | 10.50 | 0.17 |
| META1_1235 | 40-residue YVTN beta-propeller repeat family protein    | 0.078 | 0.249 | 0.173 | 0.000 | 0.095 | 0.071 | 0.257 | 0.251 | 0.218 | 0.181 | 0.071 | 0.242 | 1.80 | 0.24 | 5.14  | 0.55 |
| META1_1238 | putative Cyclic nucleotide-binding protein              | 0.000 | 0.068 | 0.000 | 0.000 | 0.071 | 0.071 | 0.129 | 0.116 | 0.099 | 0.027 | 0.060 | 0.114 | 5.67 | 0.14 | 2.83  | 0.44 |
| META1_1240 | Thioredoxin-related                                     | 0.000 | 0.227 | 0.099 | 0.000 | 0.048 | 0.047 | 0.107 | 0.077 | 0.079 | 0.127 | 0.040 | 0.087 | 0.93 | 0.30 | 3.25  | 0.46 |
| META1_1255 | protein of unknown function                             | 0.000 | 0.000 | 0.000 | 0.000 | 0.095 | 0.000 | 0.000 | 0.000 | 0.000 | 0.000 | 0.040 | 0.000 | n.d. | n.d. | 0.00  | 0.37 |
| META1_1258 | putative glycosyl transferase                           | 1.558 | 1.971 | 2.177 | 2.367 | 1.948 | 1.441 | 1.457 | 1.740 | 1.866 | 1.950 | 1.794 | 1.694 | 1.17 | 0.40 | 1.42  | 0.52 |
| META1_1259 | protein of unknown function, putative methyltransferase | 0.000 | 0.091 | 0.124 | 0.338 | 0.190 | 0.142 | 0.086 | 0.116 | 0.198 | 0.082 | 0.192 | 0.134 | 2.22 | 0.40 | 1.05  | 0.22 |
| META1_1262 | putative Peptidoglycan-binding protein                  | 0.312 | 0.272 | 0.297 | 0.473 | 0.499 | 0.260 | 0.321 | 0.367 | 0.337 | 0.290 | 0.393 | 0.343 | 1.59 | 0.05 | 1.31  | 0.54 |
| META1_1264 | conserved protein of unknown function precursor; puta   | 0.428 | 0.431 | 0.346 | 0.135 | 0.428 | 0.260 | 0.321 | 0.387 | 0.298 | 0.399 | 0.312 | 0.336 | 1.14 | 0.16 | 1.61  | 0.43 |
| META1_1265 | conserved protein of unknown function; putative export  | 0.234 | 0.181 | 0.124 | 0.000 | 0.190 | 0.095 | 0.150 | 0.251 | 0.198 | 0.172 | 0.121 | 0.202 | 1.58 | 0.64 | 2.50  | 0.43 |
| META1_1266 | conserved protein of unknown function                   | 0.156 | 0.113 | 0.000 | 0.000 | 0.048 | 0.071 | 0.000 | 0.000 | 0.000 | 0.082 | 0.050 | 0.000 | 0.00 | 0.12 | 0.00  | 0.12 |
| META1_1271 | transcriptional regulator, GntR family                  | n.d.  | 0.000 | 0.000 | 0.000 | 0.000 | 0.000 | 0.129 | 0.000 | 0.000 | 0.000 | 0.000 | 0.040 | n.d. | 0.37 | n.d.  | 0.37 |
| META1_1272 | putative tripartite ATP-independent periplasmic transp  | 0.195 | 0.113 | 0.124 | 0.271 | 0.000 | 0.071 | 0.321 | 0.329 | 0.437 | 0.136 | 0.071 | 0.363 | 3.60 | 0.01 | 7.71  | 0.54 |
| META1_1273 | putative tripartite ATP-independent periplasmic transp  | 0.078 | 0.113 | 0.074 | 0.000 | 0.095 | 0.071 | 0.150 | 0.174 | 0.198 | 0.091 | 0.071 | 0.175 | 2.60 | 0.01 | 3.71  | 0.49 |
| META1_1278 | Cysteine synthase                                       | 0.350 | 0.317 | 0.371 | 0.473 | 0.380 | 0.425 | 0.343 | 0.290 | 0.337 | 0.345 | 0.413 | 0.323 | 1.26 | 0.38 | 1.17  | 0.03 |
| META1_1280 | conserved protein of unknown function precursor         | 0.000 | 0.068 | 0.074 | 0.000 | 0.000 | 0.071 | 0.107 | 0.077 | 0.079 | 0.054 | 0.030 | 0.087 | 2.17 | 0.40 | 4.33  | 0.13 |
| META1_1282 | conserved protein of unknown function (large extracell  | 1.674 | 1.722 | 1.633 | 0.947 | 1.021 | 0.803 | 0.643 | 0.773 | 0.834 | 1.678 | 0.917 | 0.753 | 0.61 | 0.00 | 1.23  | 0.12 |
| META1_1285 | conserved protein of unknown function; putative trans   | 0.000 | 0.113 | 0.074 | 0.000 | 0.000 | 0.071 | 0.129 | 0.155 | 0.119 | 0.073 | 0.030 | 0.134 | 2.50 | 0.43 | 6.67  | 0.15 |
| META1_1288 | conserved protein of unknown function                   | 0.000 | 0.000 | 0.000 | 0.000 | 0.000 | 0.000 | 0.064 | 0.000 | 0.040 | 0.000 | 0.000 | 0.034 | n.d. | 0.12 | n.d.  | 0.12 |
| META1_1291 | conserved protein of unknown function; putative export  | 0.000 | 0.000 | 0.000 | 0.000 | 0.095 | 0.118 | 0.043 | 0.000 | 0.000 | 0.000 | 0.091 | 0.013 | n.d. | 0.37 | 0.22  | 0.58 |
| META1_1292 | cytochrome c-type biogenesis protein CyC precursor      | 0.000 | 0.000 | 0.049 | 0.000 | 0.000 | 0.047 | 0.000 | 0.097 | 0.000 | 0.018 | 0.020 | 0.034 | 2.50 | 0.96 | 2.50  | 0.96 |
| META1_1293 | cytochrome c-type biogenesis protein CyC; heme lyase    | 0.000 | 0.000 | 0.049 | 0.000 | 0.000 | 0.000 | 0.000 | 0.000 | 0.000 | 0.018 | 0.000 | 0.000 | 0.00 | 0.37 | n.d.  | n.d. |
| META1_1294 | cytochrome c-type biogenesis protein CyC; periplasmic   | 0.117 | 0.000 | 0.099 | 0.271 | 0.143 | 0.000 |       |       |       |       |       |       |      |      |       |      |

|            |                                                          |       |       |       |       |       |       |       |       |       |       |       |       |       |      |       |      |
|------------|----------------------------------------------------------|-------|-------|-------|-------|-------|-------|-------|-------|-------|-------|-------|-------|-------|------|-------|------|
| META1_1401 | malate dehydrogenase, FAD/NAD(P)-binding domain (t       | 0.779 | 0.816 | 0.891 | 0.271 | 0.285 | 0.213 | 0.043 | 0.097 | 0.099 | 0.835 | 0.252 | 0.081 | 0.13  | 0.00 | 0.48  | 0.01 |
| META1_1403 | conserved protein of unknown function                    | 0.000 | 0.000 | 0.099 | 0.000 | 0.000 | 0.000 | 0.000 | 0.000 | 0.000 | 0.036 | 0.000 | 0.000 | 0.00  | 0.37 | n.d.  | n.d. |
| META1_1404 | conserved protein of unknown function                    | 0.350 | 0.272 | 0.520 | 0.203 | 0.285 | 0.236 | 0.279 | 0.367 | 0.179 | 0.381 | 0.252 | 0.276 | 0.98  | 0.30 | 1.64  | 0.70 |
| META1_1405 | putative ABC superfamily protein                         | 1.752 | 1.609 | 1.188 | 1.217 | 0.665 | 0.709 | 1.007 | 1.121 | 0.814 | 1.488 | 0.766 | 0.981 | 0.89  | 0.05 | 1.92  | 0.50 |
| META1_1406 | conserved protein of unknown function                    | 0.195 | 0.363 | 0.520 | 0.000 | 0.238 | 0.142 | 0.214 | 0.290 | 0.298 | 0.381 | 0.161 | 0.269 | 0.95  | 0.50 | 2.50  | 0.43 |
| META1_1407 | conserved protein of unknown function, putative zinc i   | 0.078 | 0.181 | 0.198 | 0.135 | 0.095 | 0.071 | 0.014 | 0.232 | 0.238 | 0.163 | 0.091 | 0.228 | 1.89  | 0.18 | 3.78  | 0.01 |
| META1_1408 | glucose-6-phosphate 1-dehydrogenase (G6PD)               | 0.000 | 0.204 | 0.198 | 0.000 | 0.000 | 0.000 | 0.086 | 0.000 | 0.040 | 0.154 | 0.000 | 0.040 | 0.35  | 0.86 | n.d.  | 0.12 |
| META1_1411 | erotidine 5'-phosphate decarboxylase                     | 0.234 | 0.295 | 0.272 | 0.203 | 0.285 | 0.378 | 0.257 | 0.445 | 0.278 | 0.272 | 0.312 | 0.329 | 1.63  | 0.39 | 1.58  | 0.64 |
| META1_1412 | conserved protein of unknown function (DUF1330)          | 0.156 | 0.113 | 0.124 | 0.203 | 0.095 | 0.000 | 0.150 | 0.193 | 0.099 | 0.127 | 0.071 | 0.148 | 1.57  | 0.69 | 3.14  | 0.38 |
| META1_1417 | Putative mutator protein MutT/NUDIX-family hydrolase     | 0.195 | 0.249 | 0.099 | 0.203 | 0.095 | 0.071 | 0.150 | 0.077 | 0.099 | 0.181 | 0.101 | 0.108 | 0.80  | 0.23 | 1.60  | 0.88 |
| META1_1418 | putative carbonic anhydrase domain                       | 1.129 | 0.884 | 0.841 | 0.947 | 0.570 | 0.592 | 0.750 | 1.044 | 0.635 | 0.925 | 0.806 | 0.813 | 1.19  | 0.37 | 1.51  | 0.92 |
| META1_1419 | putative CysQ protein (PAPS (adenosine 3'-phosphate 5    | 0.000 | 0.000 | 0.049 | 0.000 | 0.071 | 0.047 | 0.043 | 0.058 | 0.000 | 0.018 | 0.050 | 0.034 | 2.50  | 0.52 | 1.00  | 0.98 |
| META1_1420 | conserved protein of unknown function                    | 0.350 | 0.385 | 0.322 | 0.473 | 0.071 | 0.567 | 0.428 | 0.445 | 0.556 | 0.354 | 0.343 | 0.477 | 1.82  | 0.04 | 2.09  | 0.44 |
| META1_1421 | signal transduction histidine kinase with N-terminal pho | 0.000 | 0.770 | 0.619 | 1.150 | 1.639 | 0.945 | 1.221 | 1.643 | 1.766 | 0.535 | 1.270 | 1.552 | 3.92  | 0.54 | 1.83  | 0.31 |
| META1_1422 | Chemotaxis signal transduction/oligomerization protein   | 0.000 | 0.181 | 0.000 | 0.338 | 0.238 | 0.213 | 0.150 | 0.193 | 0.099 | 0.073 | 0.242 | 0.148 | 2.75  | 0.11 | 0.92  | 0.07 |
| META1_1423 | Chemotaxis response regulator protein                    | 0.000 | 0.113 | 0.000 | 0.271 | 0.119 | 0.095 | 0.086 | 0.097 | 0.139 | 0.045 | 0.131 | 0.108 | 3.20  | 0.11 | 1.23  | 0.41 |
| META1_1424 | Chemotaxis response regulator protein-glutamate meth     | 0.000 | 0.045 | 0.074 | 0.000 | 0.119 | 0.095 | 0.064 | 0.039 | 0.119 | 0.045 | 0.091 | 0.074 | 2.20  | 0.40 | 1.22  | 0.32 |
| META1_1425 | glutamate methyltransferase, chemotactic response reg    | 0.000 | 0.045 | 0.000 | 0.000 | 0.048 | 0.000 | 0.064 | 0.000 | 0.000 | 0.018 | 0.020 | 0.020 | 1.50  | 0.98 | 1.50  | 0.98 |
| META1_1429 | conserved protein of unknown function; putative mem      | 0.000 | 0.136 | 0.124 | 0.000 | 0.166 | 0.000 | 0.086 | 0.135 | 0.139 | 0.000 | 0.071 | 0.121 | 1.64  | 0.36 | 2.57  | 0.10 |
| META1_1431 | conserved protein of unknown function                    | 0.312 | 0.340 | 0.247 | 0.000 | 0.048 | 0.047 | 0.000 | 0.000 | 0.000 | 0.299 | 0.040 | 0.000 | 0.00  | 0.00 | 0.00  | 0.12 |
| META1_1432 | conserved protein of unknown function; putative expor    | 0.662 | 0.363 | 0.421 | 0.812 | 0.333 | 0.378 | 0.343 | 0.251 | 0.318 | 0.454 | 0.423 | 0.302 | 0.90  | 0.10 | 1.07  | 0.21 |
| META1_1433 | cobalamin adenosyltransferase, methylmalonyl-CoA me      | 0.234 | 0.408 | 0.247 | 0.744 | 0.285 | 0.165 | 0.257 | 0.271 | 0.397 | 0.308 | 0.302 | 0.309 | 1.35  | 0.83 | 1.53  | 0.87 |
| META1_1434 | Electron transfer flavoprotein subunit beta (Beta-ETF)   | 1.713 | 1.110 | 1.336 | 2.435 | 0.760 | 1.536 | 0.793 | 0.986 | 0.576 | 1.334 | 1.341 | 0.786 | 0.80  | 0.05 | 0.88  | 0.17 |
| META1_1435 | electron transfer flavoprotein, NAD/FAD-binding domai    | 2.064 | 1.631 | 1.683 | 2.976 | 1.330 | 1.890 | 1.157 | 0.889 | 1.032 | 1.751 | 1.814 | 1.022 | 0.79  | 0.01 | 0.84  | 0.06 |
| META1_1436 | 3-hydroxybutyryl-CoA dehydrogenase                       | 0.584 | 0.612 | 0.643 | 0.609 | 0.594 | 0.473 | 0.450 | 0.425 | 0.456 | 0.617 | 0.544 | 0.444 | 0.97  | 0.00 | 1.22  | 0.06 |
| META1_1437 | protein of unknown function                              | 0.389 | 0.136 | 0.173 | 0.000 | 0.095 | 0.000 | 0.150 | 0.077 | 0.139 | 0.209 | 0.040 | 0.121 | 0.78  | 0.20 | 4.50  | 0.13 |
| META1_1438 | putative NADPH quinone oxidoreductase                    | 0.312 | 0.431 | 0.297 | 0.406 | 0.044 | 0.473 | 0.514 | 0.367 | 0.456 | 0.354 | 0.433 | 0.444 | 1.69  | 0.17 | 1.53  | 0.76 |
| META1_1439 | uracil phosphoribosyltransferase                         | 0.195 | 0.000 | 0.000 | 0.203 | 0.261 | 0.378 | 0.343 | 0.541 | 0.437 | 0.045 | 0.302 | 0.444 | 13.20 | 0.16 | 2.20  | 0.11 |
| META1_1440 | glycosyl hydrolase (Debranching enzyme)                  | 0.000 | 0.091 | 0.074 | 0.000 | 0.000 | 0.000 | 0.000 | 0.000 | 0.060 | 0.064 | 0.000 | 0.020 | 0.43  | 0.54 | n.d.  | 0.37 |
| META1_1441 | alpha,alpha-trehalose-phosphate synthase (UDP-formin     | 0.273 | 0.431 | 0.272 | 0.000 | 0.143 | 0.189 | 0.343 | 0.290 | 0.238 | 0.336 | 0.141 | 0.289 | 1.16  | 0.62 | 3.07  | 0.47 |
| META1_1442 | conserved protein of unknown function                    | 0.350 | 0.816 | 0.682 | 0.473 | 0.238 | 0.189 | 0.257 | 0.193 | 0.357 | 0.053 | 0.060 | 0.269 | 0.56  | 0.60 | 1.60  | 0.82 |
| META1_1444 | protein of unknown function                              | 0.234 | 0.317 | 0.124 | 0.000 | 0.095 | 0.142 | 0.171 | 0.135 | 0.179 | 0.227 | 0.101 | 0.161 | 0.96  | 0.41 | 2.40  | 0.42 |
| META1_1445 | protein of unknown function                              | 0.701 | 0.725 | 0.520 | 0.271 | 0.214 | 0.307 | 0.236 | 0.290 | 0.298 | 0.644 | 0.262 | 0.276 | 0.58  | 0.00 | 1.58  | 0.74 |
| META1_1446 | histidyl-tRNA synthetase                                 | 0.389 | 0.589 | 0.495 | 0.388 | 0.618 | 0.685 | 0.536 | 0.522 | 0.576 | 0.508 | 0.605 | 0.544 | 1.45  | 0.40 | 1.35  | 0.87 |
| META1_1447 | Secretion-chaperone protein                              | 0.000 | 0.068 | 0.000 | 0.203 | 0.000 | 0.071 | 0.129 | 0.077 | 0.079 | 0.027 | 0.060 | 0.094 | 4.67  | 0.13 | 2.33  | 0.34 |
| META1_1450 | protein-export protein SecB                              | 0.740 | 0.544 | 0.445 | 0.812 | 0.736 | 0.402 | 0.750 | 0.715 | 0.814 | 0.553 | 0.605 | 0.759 | 1.85  | 0.12 | 1.88  | 0.42 |
| META1_1451 | conserved protein of unknown function, putative mem      | 0.896 | 0.929 | 0.619 | 0.473 | 0.404 | 0.449 | 0.536 | 0.464 | 0.476 | 0.807 | 0.433 | 0.491 | 0.82  | 0.02 | 1.70  | 0.17 |
| META1_1452 | putative membrane-bound lytic murein transglycosylas     | 0.000 | 0.000 | 0.000 | 0.000 | 0.143 | 0.142 | 0.000 | 0.000 | 0.040 | 0.000 | 0.121 | 0.013 | n.d.  | 0.37 | 0.17  | 0.60 |
| META1_1453 | putative Smr protein/MutS2 C-terminal, damaged DNA       | 0.000 | 0.000 | 0.000 | 0.000 | 0.000 | 0.000 | 0.043 | 0.039 | 0.000 | 0.000 | 0.000 | 0.027 | n.d.  | 0.12 | n.d.  | 0.12 |
| META1_1454 | transcription termination factor Rho; polarity suppress  | 0.584 | 1.042 | 1.262 | 1.285 | 1.876 | 1.961 | 1.050 | 1.237 | 1.131 | 1.016 | 1.824 | 1.142 | 1.52  | 0.41 | 0.94  | 0.05 |
| META1_1455 | poxB; pyruvate dehydrogenase/oxidase: FAD- and thiaz     | 0.000 | 0.453 | 0.173 | 0.000 | 0.095 | 0.000 | 0.000 | 0.039 | 0.060 | 0.245 | 0.040 | 0.034 | 0.19  | 0.80 | 1.25  | 0.48 |
| META1_1457 | Membrane protein, TerC family                            | 0.000 | 0.000 | 0.000 | 0.000 | 0.047 | 0.000 | 0.000 | 0.000 | 0.000 | 0.000 | 0.020 | 0.000 | n.d.  | n.d. | 0.00  | 0.37 |
| META1_1458 | putative acylglycerol kinase                             | 0.045 | 0.000 | 0.074 | 0.000 | 0.047 | 0.000 | 0.129 | 0.097 | 0.000 | 0.045 | 0.060 | 0.094 | 2.80  | 0.44 | 2.33  | 0.42 |
| META1_1459 | protein of unknown function; putative exported protei    | 0.078 | 0.000 | 0.000 | 0.000 | 0.000 | 0.071 | 0.043 | 0.000 | 0.000 | 0.018 | 0.030 | 0.013 | 1.00  | 0.97 | 0.67  | 0.97 |
| META1_1460 | protein of unknown function                              | 0.000 | 0.000 | 0.000 | 0.000 | 0.048 | 0.000 | 0.000 | 0.058 | 0.079 | 0.000 | 0.020 | 0.047 | n.d.  | 0.12 | 3.50  | 0.54 |
| META1_1461 | Putative acid phosphatase                                | 0.000 | 0.045 | 0.049 | 0.000 | 0.000 | 0.000 | 0.129 | 0.097 | 0.060 | 0.036 | 0.000 | 0.094 | 3.50  | 0.47 | n.d.  | 0.00 |
| META1_1462 | conserved protein of unknown function                    | 0.117 | 0.113 | 0.173 | 0.000 | 0.000 | 0.047 | 0.150 | 0.213 | 0.218 | 0.136 | 0.020 | 0.195 | 1.93  | 0.11 | 14.50 | 0.19 |
| META1_1463 | DNA-binding protein, putative transcriptional regulator  | 0.000 | 0.068 | 0.074 | 0.000 | 0.095 | 0.095 | 0.107 | 0.039 | 0.119 | 0.054 | 0.081 | 0.087 | 2.17  | 0.39 | 1.63  | 0.35 |
| META1_1465 | 2,3,4,5-tetrahydropyridine-2-carboxylate N-succinyltra   | 1.207 | 0.929 | 0.767 | 0.812 | 0.333 | 0.803 | 0.793 | 1.024 | 0.853 | 0.934 | 0.605 | 0.894 | 1.29  | 0.66 | 2.22  | 0.27 |
| META1_1467 | Putative two-component transcriptional regulator, wing   | 0.000 | 0.227 | 0.000 | 0.338 | 0.095 | 0.236 | 0.193 | 0.174 | 0.179 | 0.091 | 0.192 | 0.181 | 2.70  | 0.11 | 1.42  | 0.85 |
| META1_1468 | conserved protein of unknown function                    | 0.000 | 0.000 | 0.000 | 0.000 | 0.000 | 0.000 | 0.043 | 0.000 | 0.040 | 0.000 | 0.000 | 0.027 | n.d.  | 0.12 | n.d.  | 0.12 |
| META1_1469 | putative enzyme with PLP-binding domain, putative ala    | 0.195 | 0.498 | 0.470 | 0.203 | 0.000 | 0.189 | 0.300 | 0.445 | 0.278 | 0.417 | 0.111 | 0.343 | 1.11  | 0.85 | 4.64  | 0.46 |
| META1_1470 | leucine tRNA synthetase                                  | 1.441 | 1.359 | 1.658 | 1.217 | 1.473 | 1.110 | 1.071 | 1.102 | 0.953 | 1.488 | 1.280 | 1.042 | 0.95  | 0.01 | 1.22  | 0.11 |
| META1_1471 | tRNA modification GTPase TrmE                            | 0.000 | 0.091 | 0.000 | 0.000 | 0.143 | 0.095 | 0.000 | 0.058 | 0.060 | 0.036 | 0.101 | 0.040 | 1.50  | 0.49 | 0.60  | 0.92 |
| META1_1474 | tRNA uridine 5-carboxymethylaminomethyl modificati       | 0.000 | 0.000 | 0.000 | 0.000 | 0.095 | 0.000 | 0.000 | 0.000 | 0.000 | 0.000 | 0.040 | 0.000 | n.d.  | 0.00 | 0.00  | 0.37 |
| META1_1475 | Methyltransferase gtlB (Glucose-inhibited division prot  | 0.000 | 0.000 | 0.049 | 0.000 | 0.000 | 0.095 | 0.043 | 0.097 | 0.000 | 0.000 | 0.040 | 0.047 | 0.50  | 0.54 | 1.75  | 0.50 |
| META1_1476 | chromosome partitioning protein, ATP-binding, nucleot    | 0.000 | 0.000 | 0.074 | 0.000 | 0.000 | 0.071 | 0.107 | 0.135 | 0.139 | 0.027 | 0.030 | 0.128 | 6.33  | 0.14 | 1.33  | 0.14 |
| META1_1477 | chromosome-partitioning protein parB                     | 0.623 | 0.498 | 0.421 | 0.609 | 0.546 | 0.780 | 0.557 | 0.425 | 0.377 | 0.499 | 0.655 | 0.450 | 1.22  | 0.48 | 1.03  | 0.09 |
| META1_1478 | putative DNA polymerase III, delta subunit, holoA        | 0.000 | 0.068 | 0.000 | 0.000 | 0.048 | 0.118 | 0.043 | 0.058 | 0.060 | 0.027 | 0.071 | 0.054 | 2.67  | 0.11 | 1.14  | 0.33 |
| META1_1479 | conserved protein of unknown function; putative expor    | 0.273 | 0.068 | 0.099 | 0.338 | 0.238 | 0.095 | 0.064 | 0.039 | 0.179 | 0.127 | 0.192 | 0.094 | 1.00  | 0.48 | 0.74  | 0.18 |
| META1_1481 | protein of unknown function                              | 0.195 | 0.272 | 0.247 | 0.541 | 0.285 | 0.284 | 0.129 | 0.329 | 0.298 | 0.245 | 0.323 | 0.255 | 1.41  | 0.97 | 1.19  | 0.32 |
| META1_1483 | protein of unknown function                              | 0.000 | 0.068 | 0.074 | 0.000 | 0.048 | 0.047 | 0.000 | 0.058 | 0.079 | 0.054 | 0.040 | 0.047 | 1.17  | 0.99 | 1.75  | 0.96 |
| META1_1484 | protein of unknown function                              | 0.389 | 0.385 | 0.247 | 0.203 | 0.404 | 0.543 | 0.321 | 0.329 | 0.278 | 0.336 | 0.433 | 0.309 | 1.24  | 0.65 | 1.07  | 0.66 |
| META1_1485 | putative cyclohexadienyl dehydrogenase (tyrC-like)       | 0.078 | 0.068 | 0.074 | 0.000 | 0.285 | 0.118 | 0.214 | 0.155 | 0.119 | 0.073 | 0.171 | 0.161 | 3.00  | 0.01 | 1.41  | 0.35 |
| META1_1486 | histidinol-phosphate aminotransferase                    | 0.273 | 0.521 | 0.421 | 0.473 | 0.594 | 0.496 | 0.364 | 0.367 | 0.516 | 0.426 | 0.534 | 0.471 | 1.32  | 0.84 | 1.17  | 0.15 |
| META1_1487 | protein of unknown function; putative exported protei    | 0.000 | 0.000 | 0.000 | 0.000 | 0.095 | 0.000 | 0.086 | 0.077 | 0.139 | 0.000 | 0.040 | 0.101 | n.d.  | 0.00 | 3.    |      |

|            |                                                         |       |       |       |        |        |        |       |       |       |       |       |       |       |      |       |      |
|------------|---------------------------------------------------------|-------|-------|-------|--------|--------|--------|-------|-------|-------|-------|-------|-------|-------|------|-------|------|
| META1_1623 | protein of unknown function                             | 0.000 | 0.363 | 0.569 | 0.879  | 0.926  | 0.591  | 1.264 | 1.450 | 1.528 | 0.354 | 0.776 | 1.418 | 5.41  | 0.61 | 2.74  | 0.02 |
| META1_1624 | putative sensor hybrid histidine kinase with PAS and tw | 0.000 | 0.000 | 0.000 | 0.000  | 0.000  | 0.000  | 0.064 | 0.097 | 0.000 | 0.000 | 0.000 | 0.054 | n.d.  | 0.12 | n.d.  | 0.12 |
| META1_1625 | conserved protein of unknown function                   | 0.000 | 0.000 | 0.000 | 0.000  | 0.000  | 0.000  | 0.000 | 0.039 | 0.000 | 0.000 | 0.000 | 0.013 | n.d.  | 0.37 | n.d.  | 0.37 |
| META1_1627 | putative bacterial luciferase family oxidoreductase     | 0.000 | 0.000 | 0.000 | 0.000  | 0.000  | 0.095  | 0.086 | 0.097 | 0.000 | 0.000 | 0.040 | 0.060 | n.d.  | 0.12 | 2.25  | 0.52 |
| META1_1628 | conserved protein of unknown function; putative mem     | 0.000 | 0.000 | 0.000 | 0.000  | 0.000  | 0.047  | 0.007 | 0.000 | 0.000 | 0.000 | 0.020 | 0.000 | n.d.  | 0.00 | 0.00  | 0.37 |
| META1_1656 | conserved protein of unknown function; putative export  | 0.117 | 0.040 | 0.074 | 0.000  | 0.000  | 0.000  | 0.000 | 0.000 | 0.000 | 0.073 | 0.000 | 0.000 | 0.000 | 0.00 | 0.00  | n.d. |
| META1_1665 | putative transcriptional regulator, TetR/AcrR family    | 0.000 | 0.045 | 0.000 | 0.000  | 0.000  | 0.000  | 0.086 | 0.077 | 0.060 | 0.018 | 0.000 | 0.074 | 5.50  | 0.14 | n.d.  | 0.00 |
| META1_1667 | conserved protein of unknown function                   | 0.000 | 0.091 | 0.000 | 0.000  | 0.000  | 0.000  | 0.000 | 0.000 | 0.000 | 0.036 | 0.000 | 0.000 | 0.000 | 0.37 | n.d.  | n.d. |
| META1_1669 | Transcriptional regulator, LysR family                  | 0.000 | 0.000 | 0.000 | 0.000  | 0.000  | 0.000  | 0.000 | 0.000 | 0.040 | 0.000 | 0.000 | 0.013 | n.d.  | 0.37 | n.d.  | 0.37 |
| META1_1670 | conserved protein of unknown function; putative xylan   | 0.000 | 0.045 | 0.000 | 0.000  | 0.048  | 0.000  | 0.086 | 0.135 | 0.099 | 0.018 | 0.020 | 0.108 | 8.00  | 0.16 | 8.00  | 0.15 |
| META1_1671 | conserved protein of unknown function                   | 0.000 | 0.068 | 0.049 | 0.000  | 0.071  | 0.000  | 0.064 | 0.077 | 0.139 | 0.045 | 0.030 | 0.094 | 2.80  | 0.43 | 4.67  | 0.13 |
| META1_1673 | conserved protein of unknown function                   | 0.234 | 0.136 | 0.297 | 0.406  | 0.000  | 0.071  | 0.107 | 0.155 | 0.159 | 0.218 | 0.091 | 0.141 | 0.88  | 0.18 | 2.33  | 0.35 |
| META1_1675 | putative diguanylate cyclase with GGDEF motif; putativ  | 0.000 | 0.045 | 0.074 | 0.000  | 0.000  | 0.000  | 0.000 | 0.058 | 0.000 | 0.045 | 0.000 | 0.020 | 0.60  | 0.52 | n.d.  | 0.37 |
| META1_1676 | putative outer membrane protein, OmpW family            | 0.000 | 0.000 | 0.000 | 0.000  | 0.048  | 0.071  | 0.000 | 0.000 | 0.000 | 0.000 | 0.050 | 0.000 | n.d.  | n.d. | 0.00  | 0.12 |
| META1_1682 | gamma-glutamyltranspeptidase                            | 0.117 | 0.113 | 0.000 | 0.000  | 0.048  | 0.000  | 0.086 | 0.058 | 0.139 | 0.073 | 0.020 | 0.094 | 1.75  | 0.34 | 7.00  | 0.14 |
| META1_1685 | putative 1-acylglycerol-3-phosphate O-acyltransferase   | 0.000 | 0.159 | 0.198 | 0.000  | 0.143  | 0.118  | 0.257 | 0.406 | 0.298 | 0.136 | 0.111 | 0.323 | 3.20  | 0.47 | 4.36  | 0.52 |
| META1_1688 | MetW (putative cystathionine synthase)                  | 0.078 | 0.204 | 0.148 | 0.135  | 0.071  | 0.095  | 0.171 | 0.155 | 0.179 | 0.154 | 0.091 | 0.168 | 1.47  | 0.46 | 2.78  | 0.04 |
| META1_1689 | homoserine O-acetyltransferase                          | 0.000 | 0.249 | 0.173 | 0.271  | 0.428  | 0.354  | 0.300 | 0.174 | 0.179 | 0.163 | 0.373 | 0.215 | 1.78  | 0.38 | 0.86  | 0.09 |
| META1_1690 | methionine sulfoxide reductase (Peptide- methionine f   | 0.000 | 0.113 | 0.074 | 0.000  | 0.048  | 0.047  | 0.043 | 0.077 | 0.000 | 0.073 | 0.040 | 0.040 | 0.75  | 0.95 | 1.50  | 0.98 |
| META1_1691 | Peptide methionine sulfoxide reductase msrA (Protein-   | 0.000 | 0.000 | 0.000 | 0.203  | 0.143  | 0.095  | 0.000 | 0.039 | 0.000 | 0.000 | 0.131 | 0.013 | n.d.  | 0.37 | 0.15  | 0.18 |
| META1_1692 | bacterioferritin, an iron storage homoprotein           | 0.584 | 1.042 | 0.792 | 0.879  | 1.116  | 0.827  | 0.900 | 0.831 | 1.052 | 0.844 | 0.958 | 0.927 | 1.48  | 0.42 | 1.45  | 0.93 |
| META1_1694 | conserved protein of unknown function                   | 0.467 | 0.181 | 0.297 | 0.473  | 0.000  | 0.284  | 0.343 | 0.329 | 0.298 | 0.290 | 0.192 | 0.323 | 1.50  | 0.75 | 2.53  | 0.35 |
| META1_1696 | protein of unknown function; putative exported protein  | 1.752 | 0.906 | 0.569 | 0.000  | 0.285  | 0.260  | 0.300 | 0.406 | 0.119 | 0.980 | 0.232 | 0.276 | 0.38  | 0.05 | 1.78  | 0.36 |
| META1_1698 | protein of unknown function                             | 0.000 | 0.000 | 0.000 | 0.000  | 0.000  | 0.000  | 0.000 | 0.000 | 0.060 | 0.000 | 0.000 | 0.020 | n.d.  | 0.37 | n.d.  | 0.37 |
| META1_1700 | 50S ribosomal subunit protein L33                       | 0.350 | 0.385 | 0.371 | 0.271  | 0.570  | 0.614  | 0.771 | 0.503 | 0.695 | 0.372 | 0.544 | 0.652 | 2.37  | 0.01 | 1.80  | 0.30 |
| META1_1701 | 3-methyl-2-oxobutanoate hydroxymethyltransferase, p     | 0.312 | 0.295 | 0.371 | 0.000  | 0.285  | 0.307  | 0.300 | 0.387 | 0.337 | 0.327 | 0.252 | 0.343 | 1.42  | 0.67 | 2.04  | 0.40 |
| META1_1702 | thioredoxin-related                                     | 0.000 | 0.091 | 0.049 | 0.000  | 0.000  | 0.000  | 0.000 | 0.000 | 0.000 | 0.054 | 0.000 | 0.000 | 0.00  | 0.12 | n.d.  | n.d. |
| META1_1703 | conserved protein of unknown function; putative export  | 0.195 | 0.159 | 0.099 | 0.000  | 0.071  | 0.047  | 0.064 | 0.058 | 0.099 | 0.145 | 0.050 | 0.074 | 0.69  | 0.05 | 2.20  | 0.40 |
| META1_1704 | conserved protein of unknown function; putative export  | 0.000 | 0.068 | 0.074 | 0.000  | 0.048  | 0.000  | 0.064 | 0.155 | 0.000 | 0.054 | 0.020 | 0.074 | 1.83  | 0.96 | 5.50  | 0.57 |
| META1_1705 | Putative metallo-hydrolase/oxidoreductase               | 0.000 | 0.091 | 0.049 | 0.000  | 0.000  | 0.000  | 0.000 | 0.000 | 0.000 | 0.054 | 0.000 | 0.000 | 0.00  | 0.12 | n.d.  | n.d. |
| META1_1706 | Transcriptional regulator, TetR family                  | 0.000 | 0.045 | 0.074 | 0.000  | 0.190  | 0.213  | 0.129 | 0.155 | 0.119 | 0.045 | 0.171 | 0.134 | 4.00  | 0.50 | 1.18  | 0.32 |
| META1_1709 | putative GPase, putative CobW-like cobalamin biosynt    | 0.234 | 0.227 | 0.322 | 0.000  | 0.238  | 0.213  | 0.214 | 0.309 | 0.179 | 0.263 | 0.192 | 0.235 | 1.21  | 0.57 | 1.84  | 0.38 |
| META1_1713 | protein of unknown function                             | 0.000 | 0.091 | 0.049 | 0.000  | 0.119  | 0.000  | 0.000 | 0.155 | 0.119 | 0.054 | 0.050 | 0.094 | 2.33  | 0.92 | 2.80  | 0.53 |
| META1_1714 | conserved protein of unknown function                   | 0.000 | 0.045 | 0.074 | 0.000  | 0.214  | 0.047  | 0.107 | 0.116 | 0.139 | 0.045 | 0.111 | 0.121 | 3.60  | 0.48 | 1.64  | 0.40 |
| META1_1715 | conserved protein of unknown function, putative mem     | 0.156 | 0.204 | 0.173 | 0.203  | 0.261  | 0.213  | 0.321 | 0.135 | 0.179 | 0.181 | 0.232 | 0.208 | 1.55  | 0.69 | 1.35  | 0.67 |
| META1_1716 | protein of unknown function; putative exported protein  | 0.234 | 0.136 | 0.074 | 0.000  | 0.000  | 0.000  | 0.000 | 0.000 | 0.000 | 0.136 | 0.000 | 0.000 | 0.00  | 0.00 | n.d.  | n.d. |
| META1_1717 | conserved protein of unknown function                   | 0.117 | 0.363 | 0.148 | 0.203  | 0.261  | 0.213  | 0.279 | 0.309 | 0.417 | 0.227 | 0.232 | 0.336 | 2.00  | 0.19 | 2.17  | 0.05 |
| META1_1718 | diaminopimelate decarboxylase                           | 0.234 | 0.113 | 0.124 | 0.000  | 0.380  | 0.402  | 0.257 | 0.193 | 0.099 | 0.145 | 0.333 | 0.181 | 1.69  | 0.73 | 0.82  | 0.26 |
| META1_1719 | protein of unknown function; putative exported protein  | 0.312 | 0.000 | 0.000 | 0.000  | 0.119  | 0.142  | 0.193 | 0.116 | 0.159 | 0.073 | 0.111 | 0.155 | 2.88  | 0.09 | 2.09  | 0.40 |
| META1_1720 | protein of unknown function                             | 0.000 | 0.091 | 0.124 | 0.000  | 0.095  | 0.047  | 0.000 | 0.058 | 0.000 | 0.082 | 0.060 | 0.020 | 0.33  | 0.56 | 0.50  | 0.53 |
| META1_1721 | protein of unknown function                             | 0.000 | 0.000 | 0.074 | 0.000  | 0.000  | 0.118  | 0.107 | 0.193 | 0.099 | 0.027 | 0.050 | 0.134 | 6.67  | 0.14 | 4.00  | 0.12 |
| META1_1722 | conserved protein of unknown function                   | 0.078 | 0.091 | 0.074 | 0.203  | 0.143  | 0.118  | 0.129 | 0.097 | 0.318 | 0.082 | 0.141 | 0.181 | 3.00  | 0.14 | 1.93  | 0.91 |
| META1_1726 | serine-glyoxylate aminotransferase (SGAT)               | 1.674 | 1.427 | 1.262 | 9.401  | 10.190 | 12.404 | 5.656 | 5.103 | 5.240 | 1.424 | 1.117 | 0.523 | 5.04  | 0.00 | 0.72  | 0.00 |
| META1_1727 | Hydroxypyruvate reductase, NAD(P)H-dependent.           | 0.623 | 0.566 | 0.297 | 2.367  | 1.971  | 2.930  | 1.542 | 1.604 | 1.469 | 0.481 | 2.439 | 1.539 | 4.32  | 0.01 | 0.95  | 0.02 |
| META1_1728 | NADP-dependent methylase (dihydrodromethanopter         | 0.935 | 0.770 | 0.767 | 2.088  | 2.684  | 6.450  | 3.706 | 4.175 | 3.870 | 0.807 | 4.667 | 3.925 | 6.56  | 0.00 | 1.26  | 0.64 |
| META1_1729 | methyl tetrahydrofolate cyclohydrolase                  | 0.156 | 0.498 | 0.371 | 2.773  | 1.829  | 2.055  | 0.878 | 1.121 | 1.627 | 0.372 | 2.066 | 1.216 | 4.41  | 0.03 | 0.88  | 0.05 |
| META1_1730 | Malate thiokinase, large subunit                        | 0.350 | 0.816 | 0.619 | 4.531  | 5.154  | 5.505  | 2.314 | 2.532 | 2.342 | 0.635 | 5.211 | 2.399 | 5.10  | 0.00 | 0.69  | 0.00 |
| META1_1731 | Malate thiokinase, small subunit                        | 0.234 | 0.249 | 0.198 | 2.976  | 2.565  | 3.544  | 1.585 | 1.256 | 1.131 | 0.227 | 3.044 | 1.317 | 7.84  | 0.00 | 0.65  | 0.00 |
| META1_1732 | phosphoenolpyruvate carboxylase                         | 0.273 | 0.227 | 0.198 | 4.058  | 3.705  | 3.568  | 2.292 | 2.068 | 2.104 | 0.227 | 3.699 | 2.151 | 12.80 | 0.00 | 0.87  | 0.00 |
| META1_1733 | malyl-CoA lyase/beta-methylmalyl-CoA lyase              | 2.025 | 1.835 | 1.509 | 11.633 | 7.815  | 10.443 | 3.792 | 3.827 | 3.890 | 1.760 | 9.505 | 3.837 | 2.94  | 0.00 | 0.61  | 0.00 |
| META1_1735 | putative carboxymethylenebionolide precursor (die       | 0.584 | 0.521 | 0.247 | 0.271  | 0.303  | 0.449  | 0.300 | 0.213 | 0.179 | 0.435 | 0.373 | 0.228 | 0.71  | 0.11 | 0.92  | 0.12 |
| META1_1736 | putative transcriptional coactivator/pterin dehydratase | 0.156 | 0.204 | 0.099 | 0.135  | 0.071  | 0.047  | 0.171 | 0.155 | 0.218 | 0.154 | 0.071 | 0.181 | 1.59  | 0.43 | 3.86  | 0.06 |
| META1_1737 | ABC transporter substrate binding protein (subunit A).  | 0.000 | 0.000 | 0.000 | 0.000  | 0.000  | 0.000  | 0.086 | 0.077 | 0.099 | 0.000 | 0.000 | 0.087 | n.d.  | 0.00 | n.d.  | 0.00 |
| META1_1740 | XoxF, PQQ-linked hydrolyase of unknown function.        | 0.428 | 0.363 | 0.569 | 0.338  | 0.689  | 0.425  | 0.954 | 0.986 | 0.933 | 0.454 | 0.524 | 0.961 | 2.86  | 0.00 | 2.75  | 0.03 |
| META1_1741 | CytCchrome C                                            | 0.000 | 0.159 | 0.124 | 0.000  | 0.618  | 0.207  | 0.279 | 0.348 | 0.536 | 0.109 | 0.393 | 0.990 | 4.83  | 0.54 | 1.49  | 0.35 |
| META1_1743 | 2-amino-4-hydroxy-6-hydroxymethyldihydropteridine p     | 0.000 | 0.113 | 0.099 | 0.000  | 0.095  | 0.118  | 0.129 | 0.174 | 0.208 | 0.082 | 0.091 | 0.181 | 3.00  | 0.45 | 3.00  | 0.45 |
| META1_1744 | dihydrodromethanopterin aldolase                        | 0.000 | 0.068 | 0.000 | 0.000  | 0.095  | 0.118  | 0.086 | 0.039 | 0.139 | 0.027 | 0.091 | 0.087 | 4.33  | 0.12 | 1.44  | 0.33 |
| META1_1745 | 7,8-dihydroterate synthase (dihydroterate synthas       | 0.389 | 0.317 | 0.421 | 0.000  | 0.143  | 0.378  | 0.536 | 0.464 | 0.456 | 0.372 | 0.282 | 0.484 | 1.76  | 0.06 | 2.57  | 0.18 |
| META1_1746 | Orf3, putative exported protein                         | 0.000 | 0.000 | 0.000 | 0.000  | 0.071  | 0.095  | 0.064 | 0.000 | 0.079 | 0.000 | 0.071 | 0.047 | n.d.  | 0.12 | 1.00  | 0.98 |
| META1_1747 | Orf4                                                    | 0.117 | 0.227 | 0.074 | 0.135  | 0.238  | 0.189  | 0.321 | 0.445 | 0.357 | 0.145 | 0.202 | 0.376 | 3.50  | 0.03 | 2.80  | 0.02 |
| META1_1748 | Pyrroloquinoline quinone (PQQ) biosynthesis protein E.  | 0.234 | 0.476 | 0.322 | 0.135  | 0.238  | 0.165  | 0.450 | 0.425 | 0.357 | 0.363 | 0.192 | 0.410 | 1.53  | 0.38 | 3.21  | 0.01 |
| META1_1749 | bifunctional coenzyme pyroloquinoline quinone (PQQ)     | 1.674 | 1.133 | 1.212 | 0.947  | 0.855  | 0.803  | 1.071 | 1.430 | 1.151 | 1.288 | 0.847 | 1.223 | 1.28  | 0.58 | 2.17  | 0.03 |
| META1_1750 | Pyrroloquinoline quinone (PQQ) biosynthesis protein B   | 0.389 | 0.385 | 0.099 | 0.000  | 0.000  | 0.118  | 0.343 | 0.425 | 0.397 | 0.281 | 0.050 | 0.390 | 1.87  | 0.38 | 11.60 | 0.18 |
| META1_1752 | two-component transcriptional regulator, response reg   | 0.506 | 0.725 | 0.643 | 0.541  | 0.309  | 0.496  | 0.364 | 0.619 | 0.417 | 0.644 | 0.423 | 0.470 | 0.99  | 0.18 | 1.67  | 0.87 |
| META1_1753 | two-component transcriptional regulator, sensor kinase  | 0.000 | 0.295 | 0.272 | 0.135  | 0.190  | 0.213  | 0.300 | 0.193 | 0.278 | 0.218 | 0.192 | 0.255 | 1.58  | 0.36 | 2.00  | 0.13 |
| META1_1755 | formyltransferase/hydrolase complex Fhc subunit C       | 0.428 | 0.748 | 0.470 | 0.744  | 0.499  | 0.921  | 0.686 | 0.889 | 0.595 | 0.572 | 0.716 | 0.726 | 1.71  | 0.23 | 1.52  |      |

|            |                                                          |       |       |       |       |       |       |       |       |       |       |       |       |      |      |       |      |
|------------|----------------------------------------------------------|-------|-------|-------|-------|-------|-------|-------|-------|-------|-------|-------|-------|------|------|-------|------|
| META1_1838 | conserved protein of unknown function                    | 0.389 | 0.521 | 0.594 | 0.338 | 0.546 | 0.425 | 0.450 | 0.425 | 0.238 | 0.517 | 0.464 | 0.370 | 0.96 | 0.25 | 1.20  | 0.50 |
| META1_1839 | conserved protein of unknown function                    | 0.000 | 0.068 | 0.124 | 0.135 | 0.095 | 0.095 | 0.043 | 0.058 | 0.099 | 0.073 | 0.101 | 0.067 | 1.25 | 0.33 | 1.00  | 0.12 |
| META1_1841 | conserved protein of unknown function                    | 0.234 | 0.295 | 0.000 | 0.000 | 0.285 | 0.165 | 0.214 | 0.309 | 0.278 | 0.172 | 0.192 | 0.269 | 2.11 | 0.38 | 2.11  | 0.41 |
| META1_1843 | protein of unknown function                              | 0.000 | 0.113 | 0.074 | 0.000 | 0.000 | 0.000 | 0.043 | 0.000 | 0.060 | 0.073 | 0.000 | 0.034 | 0.63 | 0.93 | n.d.  | 0.12 |
| META1_1845 | conserved protein of unknown function                    | 0.000 | 0.000 | 0.000 | 0.000 | 0.000 | 0.000 | 0.000 | 0.043 | 0.000 | 0.000 | 0.000 | 0.013 | n.d. | 0.37 | n.d.  | 0.37 |
| META1_1846 | protein of unknown function; putative exported protein   | 0.000 | 0.000 | 0.000 | 0.000 | 0.095 | 0.000 | 0.000 | 0.000 | 0.000 | 0.000 | 0.040 | 0.000 | n.d. | n.d. | 0.00  | 0.37 |
| META1_1847 | conserved protein of unknown function                    | 0.117 | 0.113 | 0.124 | 0.000 | 0.000 | 0.000 | 0.000 | 0.000 | 0.000 | 0.118 | 0.000 | 0.000 | 0.00 | 0.00 | n.d.  | n.d. |
| META1_1849 | conserved protein of unknown function                    | 1.246 | 1.042 | 1.237 | 0.947 | 0.380 | 0.449 | 0.514 | 0.483 | 0.437 | 1.161 | 0.494 | 0.477 | 0.55 | 0.00 | 1.45  | 0.67 |
| META1_1852 | protein of unknown function                              | 0.156 | 0.091 | 0.099 | 0.000 | 0.095 | 0.071 | 0.064 | 0.058 | 0.119 | 0.109 | 0.071 | 0.081 | 1.00 | 0.24 | 1.71  | 0.37 |
| META1_1855 | Copper resistance protein A precursor                    | 1.363 | 0.295 | 0.520 | 1.082 | 0.760 | 0.756 | 0.514 | 0.309 | 0.258 | 0.626 | 0.806 | 0.356 | 0.77 | 0.33 | 0.66  | 0.02 |
| META1_1856 | Copper resistance protein CopB precursor                 | 0.779 | 0.091 | 0.247 | 0.203 | 0.166 | 0.402 | 0.193 | 0.174 | 0.179 | 0.308 | 0.272 | 0.181 | 0.79 | 0.60 | 1.00  | 0.37 |
| META1_1857 | conserved protein of unknown function                    | 0.273 | 0.295 | 0.099 | 0.000 | 0.000 | 0.000 | 0.064 | 0.058 | 0.139 | 0.218 | 0.000 | 0.087 | 0.54 | 0.11 | n.d.  | 0.00 |
| META1_1858 | Putative glucoamylase, (GLUCAN 1,4-ALPHA-GLUCOSID        | 0.195 | 0.431 | 0.297 | 0.000 | 0.048 | 0.000 | 0.107 | 0.039 | 0.099 | 0.327 | 0.020 | 0.081 | 0.33 | 0.03 | 6.00  | 0.14 |
| META1_1859 | protein of unknown function                              | 0.000 | 0.091 | 0.000 | 0.000 | 0.000 | 0.000 | 0.043 | 0.000 | 0.079 | 0.036 | 0.000 | 0.040 | 1.50 | 0.49 | n.d.  | 0.12 |
| META1_1860 | protein of unknown function                              | 0.000 | 0.000 | 0.000 | 0.000 | 0.000 | 0.071 | 0.000 | 0.000 | 0.000 | 0.000 | 0.030 | 0.000 | n.d. | n.d. | 0.00  | 0.37 |
| META1_1861 | transketolase                                            | 0.000 | 0.045 | 0.000 | 0.000 | 0.000 | 0.000 | 0.000 | 0.000 | 0.000 | 0.018 | 0.000 | 0.000 | 0.00 | 0.37 | n.d.  | n.d. |
| META1_1862 | putative Transaldolase Phosphoglucose isomerase          | 0.000 | 0.227 | 0.099 | 0.000 | 0.071 | 0.000 | 0.000 | 0.097 | 0.000 | 0.127 | 0.030 | 0.034 | 0.36 | 0.55 | 1.67  | 0.98 |
| META1_1863 | 6-phosphogluconate dehydrogenase                         | 0.000 | 0.068 | 0.000 | 0.000 | 0.000 | 0.000 | 0.000 | 0.058 | 0.000 | 0.027 | 0.000 | 0.020 | 1.00 | 0.99 | n.d.  | 0.37 |
| META1_1865 | Hydrolase (HAD superfamily)                              | 0.156 | 0.363 | 0.198 | 0.135 | 0.000 | 0.071 | 0.150 | 0.135 | 0.079 | 0.254 | 0.050 | 0.121 | 0.64 | 0.11 | 3.60  | 0.40 |
| META1_1866 | 6-phosphogluconolactonase                                | 0.000 | 0.045 | 0.000 | 0.000 | 0.000 | 0.000 | 0.064 | 0.039 | 0.000 | 0.018 | 0.000 | 0.034 | 2.50 | 0.52 | n.d.  | 0.12 |
| META1_1867 | glucanate kinase 2 ; glucanate transport, GNT I system   | 0.000 | 0.045 | 0.000 | 0.000 | 0.000 | 0.000 | 0.043 | 0.000 | 0.000 | 0.018 | 0.000 | 0.013 | 1.00 | 1.00 | n.d.  | 0.37 |
| META1_1871 | protein of unknown function                              | 0.000 | 0.000 | 0.000 | 0.000 | 0.000 | 0.047 | 0.000 | 0.077 | 0.099 | 0.000 | 0.020 | 0.060 | n.d. | 0.12 | 4.50  | 0.56 |
| META1_1872 | protein of unknown function                              | 0.273 | 0.340 | 0.396 | 0.744 | 0.190 | 0.142 | 0.279 | 0.271 | 0.238 | 0.345 | 0.252 | 0.262 | 1.03 | 0.11 | 1.56  | 0.95 |
| META1_1875 | protein of unknown function                              | 0.000 | 0.000 | 0.000 | 0.000 | 0.000 | 0.000 | 0.150 | 0.058 | 0.099 | 0.000 | 0.000 | 0.101 | n.d. | 0.00 | n.d.  | 0.00 |
| META1_1879 | protein of unknown function                              | 0.000 | 0.000 | 0.000 | 0.000 | 0.000 | 0.000 | 0.064 | 0.039 | 0.079 | 0.000 | 0.000 | 0.060 | n.d. | 0.00 | n.d.  | 0.00 |
| META1_1880 | putative plasmid stabilization protein (PIIT)            | 0.000 | 0.068 | 0.000 | 0.000 | 0.071 | 0.000 | 0.000 | 0.000 | 0.000 | 0.027 | 0.030 | 0.000 | 0.00 | 0.37 | 0.00  | 0.37 |
| META1_1881 | putative Prevent-host-death family protein               | 0.000 | 0.068 | 0.074 | 0.000 | 0.048 | 0.000 | 0.000 | 0.000 | 0.079 | 0.054 | 0.020 | 0.027 | 0.67 | 0.51 | 2.00  | 0.97 |
| META1_1889 | cation transporting P-type ATPase                        | 0.156 | 0.317 | 0.198 | 0.000 | 0.071 | 0.047 | 0.129 | 0.058 | 0.060 | 0.236 | 0.050 | 0.081 | 0.46 | 0.04 | 2.40  | 0.41 |
| META1_1890 | conserved protein of unknown function; putative alpha    | 0.000 | 0.136 | 0.124 | 0.000 | 0.048 | 0.071 | 0.000 | 0.000 | 0.079 | 0.100 | 0.050 | 0.027 | 0.36 | 0.55 | 0.80  | 0.50 |
| META1_1891 | putative acetate kinase, propionate kinase               | 0.000 | 0.068 | 0.049 | 0.000 | 0.000 | 0.000 | 0.000 | 0.000 | 0.000 | 0.045 | 0.000 | 0.000 | 0.00 | 0.12 | n.d.  | n.d. |
| META1_1893 | Phosphate acetyltransferase                              | 0.113 | 0.113 | 0.000 | 0.000 | 0.000 | 0.000 | 0.000 | 0.000 | 0.000 | 0.045 | 0.000 | 0.000 | 0.00 | 0.37 | n.d.  | n.d. |
| META1_1907 | protein of unknown function; putative exported protein   | 0.156 | 0.181 | 0.099 | 0.000 | 0.000 | 0.047 | 0.000 | 0.000 | 0.000 | 0.145 | 0.020 | 0.000 | 0.00 | 0.00 | 0.00  | 0.37 |
| META1_1912 | protein of unknown function; putative exported protein   | 0.000 | 0.068 | 0.000 | 0.000 | 0.000 | 0.000 | 0.000 | 0.000 | 0.040 | 0.027 | 0.000 | 0.013 | 0.67 | 0.97 | n.d.  | 0.37 |
| META1_1915 | protein of unknown function                              | 0.000 | 0.000 | 0.000 | 0.000 | 0.071 | 0.000 | 0.064 | 0.000 | 0.040 | 0.000 | 0.030 | 0.034 | n.d. | 0.12 | 1.67  | 0.50 |
| META1_1916 | putative ParA-like protein (chromosome partitioning)     | 0.000 | 0.227 | 0.198 | 0.000 | 0.119 | 0.142 | 0.086 | 0.135 | 0.060 | 0.163 | 0.111 | 0.094 | 0.78 | 0.26 | 1.27  | 0.32 |
| META1_1923 | protein of unknown function                              | 0.000 | 0.000 | 0.000 | 0.000 | 0.048 | 0.000 | 0.000 | 0.000 | 0.040 | 0.000 | 0.020 | 0.013 | n.d. | 0.37 | 1.00  | 0.99 |
| META1_1925 | putative oxalate/formate antiporter                      | 0.000 | 0.000 | 0.000 | 0.000 | 0.000 | 0.000 | 1.393 | 1.295 | 1.231 | 0.000 | 0.000 | 1.304 | n.d. | 0.00 | n.d.  | 0.00 |
| META1_1926 | ethanolamine ammonia-lyase, heavy chain                  | 0.000 | 0.000 | 0.000 | 0.000 | 0.000 | 0.000 | 0.000 | 0.058 | 0.000 | 0.000 | 0.000 | 0.020 | n.d. | 0.37 | n.d.  | 0.37 |
| META1_1927 | putative ethylamine ammonia-lyase light chain (eutC)     | 0.000 | 0.000 | 0.000 | 0.000 | 0.000 | 0.000 | 0.043 | 0.000 | 0.000 | 0.000 | 0.000 | 0.013 | n.d. | 0.37 | n.d.  | 0.37 |
| META1_1928 | putative dihydroxyacid dehydratase (livD-like)           | 0.584 | 0.725 | 0.718 | 0.947 | 0.926 | 0.898 | 0.728 | 0.831 | 0.754 | 0.689 | 0.917 | 0.773 | 1.51 | 0.17 | 1.26  | 0.01 |
| META1_1929 | protein of unknown function                              | 0.000 | 0.045 | 0.000 | 0.000 | 0.071 | 0.000 | 0.000 | 0.000 | 0.040 | 0.018 | 0.030 | 0.013 | 1.00 | 0.99 | 0.67  | 0.97 |
| META1_1930 | Exodeoxyribonuclease III (Exonuclease III) (EXO III) (AP | 0.117 | 0.181 | 0.124 | 0.271 | 0.048 | 0.189 | 0.257 | 0.174 | 0.198 | 0.145 | 0.141 | 0.208 | 1.94 | 0.09 | 2.21  | 0.47 |
| META1_1932 | putative pyrophosphate-CoA ligase (Proapyl)-CoA synthet  | 0.156 | 0.385 | 0.345 | 0.935 | 0.345 | 0.300 | 0.471 | 0.336 | 0.308 | 0.318 | 0.121 | 0.336 | 1.43 | 0.12 | 4.17  | 0.54 |
| META1_1933 | conserved protein of unknown function                    | 0.117 | 0.136 | 0.223 | 0.000 | 0.000 | 0.047 | 0.171 | 0.000 | 0.119 | 0.163 | 0.020 | 0.094 | 0.78 | 0.38 | 7.00  | 0.59 |
| META1_1934 | conserved protein of unknown function                    | 0.078 | 0.091 | 0.074 | 0.000 | 0.095 | 0.118 | 0.000 | 0.039 | 0.060 | 0.082 | 0.091 | 0.034 | 0.56 | 0.45 | 0.56  | 0.91 |
| META1_1936 | phosphoribosylaminoimidazole carboxylase - AIR carb      | 0.078 | 0.159 | 0.000 | 0.000 | 0.309 | 0.189 | 0.171 | 0.116 | 0.099 | 0.082 | 0.212 | 0.128 | 2.11 | 0.39 | 0.90  | 0.29 |
| META1_1937 | phosphoribosylaminoimidazole carboxylase - AIR carb      | 0.428 | 0.295 | 0.247 | 0.473 | 0.214 | 0.307 | 0.193 | 0.329 | 0.318 | 0.308 | 0.292 | 0.282 | 1.24 | 0.57 | 1.45  | 0.64 |
| META1_1938 | conserved protein of unknown function; putative export   | 0.506 | 0.204 | 0.371 | 0.812 | 0.309 | 0.638 | 0.493 | 0.445 | 0.357 | 0.336 | 0.524 | 0.430 | 1.73 | 0.45 | 1.23  | 0.48 |
| META1_1940 | fructose 1,6-bisphosphatase II                           | 0.701 | 0.340 | 0.495 | 0.338 | 0.380 | 0.543 | 0.300 | 0.290 | 0.357 | 0.481 | 0.443 | 0.316 | 0.89 | 0.11 | 1.07  | 0.16 |
| META1_1941 | Homoserine dehydrogenase                                 | 2.064 | 1.677 | 1.880 | 1.285 | 1.710 | 1.654 | 1.050 | 1.276 | 1.131 | 1.842 | 1.623 | 1.156 | 0.85 | 0.00 | 1.07  | 0.05 |
| META1_1942 | conserved protein of unknown function; putative export   | 0.000 | 0.091 | 0.099 | 0.000 | 0.071 | 0.071 | 0.064 | 0.077 | 0.079 | 0.073 | 0.060 | 0.074 | 1.38 | 0.34 | 1.83  | 0.38 |
| META1_1943 | protein of unknown function; putative exported protein   | 0.428 | 0.227 | 0.124 | 0.203 | 0.238 | 0.213 | 0.193 | 0.193 | 0.119 | 0.236 | 0.222 | 0.168 | 0.96 | 0.45 | 1.14  | 0.17 |
| META1_1948 | putative glycosyl transferase                            | 0.000 | 0.000 | 0.000 | 0.000 | 0.095 | 0.165 | 0.000 | 0.077 | 0.079 | 0.000 | 0.111 | 0.054 | n.d. | 0.12 | 0.73  | 0.95 |
| META1_1952 | Putative cytochrome bd-quinol oxidase subunit I          | 0.000 | 0.113 | 0.000 | 0.000 | 0.000 | 0.000 | 0.000 | 0.000 | 0.000 | 0.045 | 0.000 | 0.000 | 0.00 | 0.37 | n.d.  | n.d. |
| META1_1955 | protein of unknown function                              | 0.000 | 0.068 | 0.049 | 0.000 | 0.048 | 0.095 | 0.150 | 0.077 | 0.099 | 0.045 | 0.060 | 0.038 | 3.20 | 0.46 | 2.67  | 0.44 |
| META1_1958 | putative phosphotransferase protein phosphatase          | 0.000 | 0.000 | 0.000 | 0.000 | 0.000 | 0.000 | 0.000 | 0.040 | 0.000 | 0.000 | 0.000 | 0.013 | n.d. | 0.37 | n.d.  | 0.37 |
| META1_1960 | conserved protein of unknown function                    | 0.000 | 0.159 | 0.124 | 0.000 | 0.048 | 0.000 | 0.107 | 0.077 | 0.218 | 0.109 | 0.020 | 0.134 | 1.67 | 0.36 | 10.00 | 0.16 |
| META1_1961 | bifunctional HsdR: L-histidinal:NAD+ dehydrogenase; L    | 0.857 | 0.725 | 0.767 | 0.541 | 0.926 | 0.662 | 0.621 | 0.464 | 0.556 | 0.771 | 0.756 | 0.544 | 0.95 | 0.02 | 1.08  | 0.25 |
| META1_1962 | conserved protein of unknown function                    | 0.156 | 0.136 | 0.124 | 0.000 | 0.143 | 0.071 | 0.000 | 0.097 | 0.000 | 0.136 | 0.091 | 0.034 | 0.33 | 0.13 | 0.56  | 0.52 |
| META1_1963 | protein of unknown function                              | 0.273 | 0.091 | 0.173 | 0.000 | 0.119 | 0.142 | 0.064 | 0.174 | 0.159 | 0.163 | 0.111 | 0.134 | 1.11 | 0.55 | 1.82  | 0.37 |
| META1_1964 | UDP-N-acetylglucosamine 1-carboxyvinyltransferase        | 1.012 | 1.042 | 0.916 | 0.338 | 1.116 | 1.016 | 0.900 | 1.102 | 0.655 | 0.989 | 0.958 | 0.887 | 1.21 | 0.44 | 1.39  | 0.69 |
| META1_1968 | 5-aminolevulinic acid synthase (ALAS)                    | 0.000 | 0.566 | 0.371 | 0.135 | 0.404 | 0.354 | 0.300 | 0.271 | 0.298 | 0.363 | 0.343 | 0.289 | 1.08 | 0.30 | 1.26  | 0.84 |
| META1_1970 | protein of unknown function; putative exported protein   | 0.000 | 0.068 | 0.074 | 0.000 | 0.000 | 0.000 | 0.000 | 0.000 | 0.060 | 0.054 | 0.000 | 0.020 | 0.50 | 0.53 | n.d.  | 0.37 |
| META1_1971 | Alkylphosphonate uptake protein                          | 0.156 | 0.159 | 0.049 | 0.000 | 0.000 | 0.000 | 0.150 | 0.116 | 0.099 | 0.118 | 0.000 | 0.121 | 1.38 | 0.79 | n.d.  | 0.00 |
| META1_1973 | conserved protein of unknown function, putative DNA-     | 0.000 | 0.000 | 0.000 | 0.000 | 0.071 | 0.142 | 0.000 | 0.039 | 0.000 | 0.000 | 0.091 | 0.013 | n.d. | 0.37 | 0.22  | 0.58 |
| META1_1974 | 2-dehydro-3-deoxyphosphopentolate aldolase               | 1.129 | 1.654 | 1.485 | 0.744 | 1.045 | 1.252 | 1.093 | 1.140 | 1.151 | 1.470 | 1.089 | 1.129 | 1.04 | 0.13 | 1.56  | 0.45 |
| META1_1977 | conserved protein of unknown function                    | 0.000 | 0.317 | 0.371 | 0.203 | 0.000 | 0.260 | 0.279 | 0.348 | 0.298 | 0.263 | 0.141 |       |      |      |       |      |

|            |                                                          |        |       |       |       |       |        |       |       |       |       |       |       |       |      |       |      |
|------------|----------------------------------------------------------|--------|-------|-------|-------|-------|--------|-------|-------|-------|-------|-------|-------|-------|------|-------|------|
| META1_2067 | membrane-associated zinc metalloprotease                 | 0.000  | 0.113 | 0.148 | 0.406 | 0.309 | 0.331  | 0.193 | 0.155 | 0.198 | 0.100 | 0.333 | 0.181 | 2.45  | 0.42 | 0.82  | 0.00 |
| META1_2068 | 1-deoxy-D-xylulose 5-phosphate reductoisomerase (DXP)    | 0.428  | 0.408 | 0.445 | 0.406 | 0.784 | 0.732  | 0.514 | 0.561 | 0.337 | 0.426 | 0.706 | 0.470 | 1.49  | 0.66 | 1.00  | 0.33 |
| META1_2070 | undecaprenyl pyrophosphate synthetase (di-trans,poly-    | 0.000  | 0.068 | 0.124 | 0.000 | 0.000 | 0.001  | 0.064 | 0.077 | 0.099 | 0.073 | 0.030 | 0.081 | 1.50  | 0.35 | 4.00  | 0.12 |
| META1_2071 | Ribosome recycling factor (Ribosome releasing factor)    | 0.973  | 0.793 | 0.742 | 1.420 | 0.831 | 0.591  | 0.814 | 1.256 | 0.774 | 0.816 | 0.816 | 0.954 | 1.58  | 0.57 | 1.75  | 0.89 |
| META1_2072 | conserved protein of unknown function; putative mem      | 0.000  | 0.000 | 0.000 | 0.000 | 0.000 | 0.000  | 0.150 | 0.155 | 0.238 | 0.000 | 0.000 | 0.181 | n.d.  | n.d. | n.d.  | 0.00 |
| META1_2074 | putative ubiquinolone biosynthesis hydroxylase/monom     | 0.000  | 0.045 | 0.000 | 0.000 | 0.238 | 0.189  | 0.086 | 0.135 | 0.066 | 0.086 | 0.189 | 0.094 | 7.06  | 0.15 | 0.78  | 0.26 |
| META1_2077 | putative 3-oxoacyl-[acyl-carrier-protein] reductase (Fab | 0.078  | 0.091 | 0.000 | 0.000 | 0.000 | 0.000  | 0.043 | 0.039 | 0.000 | 0.054 | 0.000 | 0.027 | 0.67  | 0.92 | n.d.  | 0.12 |
| META1_2079 | putative transketolase (C-terminal domain)               | 0.000  | 0.068 | 0.049 | 0.000 | 0.000 | 0.000  | 0.000 | 0.000 | 0.040 | 0.045 | 0.000 | 0.013 | 0.40  | 0.54 | n.d.  | 0.37 |
| META1_2086 | acyl-CoA thioesterase II                                 | 0.117  | 0.091 | 0.099 | 0.000 | 0.000 | 0.071  | 0.214 | 0.116 | 0.099 | 0.100 | 0.030 | 0.141 | 1.91  | 0.31 | 7.00  | 0.15 |
| META1_2087 | nitrogen acetyltransferase/protein for GlnL, GlnE,       | 0.000  | 0.113 | 0.000 | 0.271 | 0.214 | 0.402  | 0.193 | 0.174 | 0.119 | 0.045 | 0.302 | 0.161 | 4.80  | 0.13 | 0.80  | 0.07 |
| META1_2088 | ammonium transport protein (Amt family)                  | 0.156  | 0.000 | 0.000 | 0.000 | 1.045 | 0.756  | 0.386 | 0.135 | 0.258 | 0.036 | 0.766 | 0.255 | 9.50  | 0.14 | 0.50  | 0.20 |
| META1_2089 | protein of unknown function; putative exported protein   | 0.000  | 0.091 | 0.099 | 0.338 | 0.048 | 0.165  | 0.064 | 0.039 | 0.040 | 0.073 | 0.141 | 0.047 | 0.88  | 0.29 | 0.50  | 0.14 |
| META1_2090 | DNA-binding membrane protein required for chromoso       | 0.000  | 0.000 | 0.000 | 0.000 | 0.119 | 0.000  | 0.000 | 0.077 | 0.000 | 0.000 | 0.050 | 0.027 | n.d.  | 0.37 | 0.80  | 0.98 |
| META1_2093 | Formate dehydrogenase subunit B                          | 0.000  | 0.091 | 0.000 | 0.000 | 0.048 | 0.047  | 0.000 | 0.000 | 0.000 | 0.036 | 0.040 | 0.000 | 0.00  | 0.37 | 0.00  | 0.12 |
| META1_2094 | Formate dehydrogenase subunit A                          | 0.312  | 1.042 | 1.039 | 1.014 | 0.903 | 0.898  | 0.000 | 0.039 | 0.000 | 0.871 | 0.917 | 0.013 | 0.02  | 0.32 | 0.02  | 0.35 |
| META1_2095 | 3-hydroxy-oxalate oxidase, FMN-linked                    | 0.156  | 0.385 | 0.272 | 0.338 | 0.404 | 0.331  | 0.236 | 0.290 | 0.298 | 0.290 | 0.363 | 0.276 | 1.28  | 0.80 | 1.14  | 0.05 |
| META1_2096 | conserved protein of unknown function (DUF952)           | 0.000  | 0.159 | 0.099 | 0.000 | 0.095 | 0.118  | 0.150 | 0.097 | 0.159 | 0.100 | 0.091 | 0.134 | 1.82  | 0.38 | 2.22  | 0.41 |
| META1_2097 | putative LexA/Signal peptidase                           | 0.117  | 0.295 | 0.099 | 0.000 | 0.119 | 0.189  | 0.171 | 0.174 | 0.139 | 0.181 | 0.131 | 0.161 | 1.20  | 0.86 | 1.85  | 0.38 |
| META1_2100 | serine acetyltransferase                                 | 0.000  | 0.181 | 0.124 | 0.000 | 0.000 | 0.142  | 0.193 | 0.213 | 0.139 | 0.118 | 0.060 | 0.181 | 2.08  | 0.40 | 4.50  | 0.13 |
| META1_2101 | putative shikimate kinase with helix-turn-helix domain   | 0.818  | 0.884 | 1.039 | 0.338 | 0.143 | 0.614  | 0.643 | 0.677 | 0.714 | 0.925 | 0.373 | 0.679 | 0.99  | 0.02 | 2.73  | 0.14 |
| META1_2106 | response regulator in two-component regulatory system    | 0.000  | 0.000 | 0.000 | 0.000 | 0.000 | 0.000  | 0.086 | 0.058 | 0.000 | 0.000 | 0.000 | 0.047 | n.d.  | 0.12 | n.d.  | 0.12 |
| META1_2107 | putative two-component system regulator: response re     | 0.000  | 0.181 | 0.173 | 0.000 | 0.000 | 0.000  | 0.107 | 0.077 | 0.000 | 0.136 | 0.000 | 0.060 | 0.60  | 0.92 | n.d.  | 0.12 |
| META1_2110 | conserved protein of unknown function                    | 0.000  | 0.091 | 0.074 | 0.000 | 0.000 | 0.000  | 0.000 | 0.000 | 0.000 | 0.064 | 0.000 | 0.000 | 0.00  | 0.12 | n.d.  | n.d. |
| META1_2111 | conserved protein of unknown function; putative mem      | 0.078  | 0.091 | 0.074 | 0.000 | 0.000 | 0.000  | 0.000 | 0.000 | 0.060 | 0.082 | 0.000 | 0.020 | 0.33  | 0.13 | n.d.  | 0.37 |
| META1_2112 | TonB-dependent siderophore receptor                      | 0.350  | 0.000 | 0.000 | 0.000 | 0.000 | 0.000  | 0.000 | 0.000 | 0.000 | 0.082 | 0.000 | 0.000 | 0.00  | 0.37 | n.d.  | n.d. |
| META1_2114 | Oxidoreductase, molybdopterin binding                    | 0.000  | 0.136 | 0.074 | 0.000 | 0.000 | 0.000  | 0.107 | 0.077 | 0.040 | 0.082 | 0.000 | 0.074 | 1.22  | 0.33 | n.d.  | 0.00 |
| META1_2115 | putative oxidoreductase, FAD-binding domain              | 0.000  | 0.000 | 0.000 | 0.000 | 0.000 | 0.000  | 0.000 | 0.000 | 0.040 | 0.000 | 0.000 | 0.013 | n.d.  | 0.37 | n.d.  | 0.37 |
| META1_2116 | conserved protein of unknown function                    | 0.000  | 0.159 | 0.198 | 0.473 | 0.119 | 0.142  | 0.086 | 0.058 | 0.119 | 0.136 | 0.181 | 0.087 | 0.87  | 0.28 | 0.72  | 0.15 |
| META1_2118 | 3-enolpyruvylshikimate 5-phosphate synthetase            | 0.389  | 0.340 | 0.594 | 0.473 | 0.784 | 0.732  | 0.886 | 0.754 | 0.893 | 0.445 | 0.716 | 0.780 | 2.37  | 0.03 | 1.63  | 0.37 |
| META1_2119 | cytidine monophosphate (CMP) kinase                      | 0.389  | 0.453 | 0.445 | 0.406 | 0.475 | 0.449  | 0.471 | 0.619 | 0.397 | 0.435 | 0.454 | 0.497 | 1.54  | 0.40 | 1.64  | 0.52 |
| META1_2123 | creatininase (creative amidohydrolase)                   | 0.135  | 0.249 | 0.272 | 0.676 | 0.309 | 0.378  | 0.407 | 0.445 | 0.337 | 0.245 | 0.393 | 0.397 | 2.19  | 0.02 | 1.51  | 0.75 |
| META1_2124 | protein of unknown function                              | 0.000  | 0.000 | 0.000 | 0.000 | 0.000 | 0.000  | 0.000 | 0.058 | 0.040 | 0.000 | 0.000 | 0.034 | n.d.  | 0.12 | n.d.  | 0.12 |
| META1_2125 | protein of unknown function                              | 0.273  | 0.227 | 0.124 | 0.000 | 0.048 | 0.071  | 0.086 | 0.155 | 0.139 | 0.200 | 0.050 | 0.128 | 0.86  | 0.19 | 3.80  | 0.49 |
| META1_2126 | conserved protein of unknown function; putative CsdB     | 0.428  | 0.272 | 0.272 | 0.000 | 0.048 | 0.071  | 0.129 | 0.000 | 0.179 | 0.308 | 0.050 | 0.101 | 0.44  | 0.50 | 3.00  | 0.89 |
| META1_2127 | putative oxalate/formate antiporter                      | 0.000  | 0.000 | 0.000 | 0.000 | 0.095 | 0.000  | 0.707 | 0.580 | 0.774 | 0.000 | 0.040 | 0.685 | n.d.  | 0.00 | 25.50 | 0.25 |
| META1_2128 | Fumarylacetoacetate (FAA) hydrolase family               | 0.000  | 0.000 | 0.000 | 0.203 | 0.214 | 0.236  | 1.307 | 1.353 | 0.913 | 0.000 | 0.222 | 1.190 | n.d.  | 0.00 | 8.05  | 0.00 |
| META1_2129 | putative 2-dehydrodipantate 2-reductase (ketopantate     | 0.117  | 0.091 | 0.099 | 0.812 | 0.570 | 0.827  | 2.249 | 2.474 | 2.699 | 0.100 | 0.716 | 2.480 | 33.55 | 0.00 | 5.20  | 0.00 |
| META1_2130 | putative acyl-coenzyme A synthetase                      | 0.000  | 0.113 | 0.148 | 0.609 | 0.618 | 0.496  | 1.628 | 1.604 | 1.707 | 0.100 | 0.564 | 1.647 | 22.27 | 0.89 | 4.38  | 0.00 |
| META1_2133 | conserved protein of unknown function                    | 0.000  | 0.000 | 0.000 | 0.000 | 0.000 | 0.047  | 0.000 | 0.000 | 0.000 | 0.000 | 0.020 | 0.000 | n.d.  | n.d. | 0.00  | 0.37 |
| META1_2136 | 4-oxalocrotonate tautomerase                             | 0.234  | 0.204 | 0.000 | 0.000 | 0.143 | 0.142  | 0.236 | 0.251 | 0.258 | 0.136 | 0.121 | 0.249 | 2.47  | 0.39 | 3.08  | 0.46 |
| META1_2137 | malyl-CoA thioesterase                                   | 0.740  | 0.748 | 0.668 | 0.609 | 0.594 | 0.425  | 0.686 | 0.831 | 0.754 | 0.717 | 0.524 | 0.759 | 1.43  | 0.49 | 2.17  | 0.06 |
| META1_2138 | conserved protein of unknown function                    | 0.078  | 0.000 | 0.000 | 0.000 | 0.000 | 0.000  | 0.000 | 0.000 | 0.000 | 0.018 | 0.000 | 0.000 | 0.00  | 0.37 | n.d.  | n.d. |
| META1_2139 | putative haloacid dehalogenase family hydrolase          | 0.000  | 0.000 | 0.000 | 0.000 | 0.000 | 0.000  | 0.064 | 0.007 | 0.064 | 0.000 | 0.000 | 0.067 | 5.06  | 0.13 | n.d.  | 0.00 |
| META1_2141 | protein of unknown function                              | 0.000  | 0.000 | 0.000 | 0.000 | 0.000 | 0.000  | 0.043 | 0.039 | 0.060 | 0.000 | 0.000 | 0.047 | n.d.  | 0.00 | n.d.  | 0.00 |
| META1_2143 | putative dioxigenase/glyoxalase family protein           | 0.000  | 0.000 | 0.000 | 0.000 | 0.048 | 0.000  | 0.064 | 0.000 | 0.040 | 0.000 | 0.020 | 0.034 | n.d.  | 0.12 | 2.50  | 0.52 |
| META1_2144 | conserved protein of unknown function                    | 0.000  | 0.000 | 0.000 | 0.000 | 0.119 | 0.095  | 0.129 | 0.135 | 0.159 | 0.000 | 0.091 | 0.141 | n.d.  | 0.00 | 2.33  | 0.42 |
| META1_2147 | protein of unknown function                              | 0.000  | 0.068 | 0.173 | 0.203 | 0.380 | 0.213  | 0.364 | 0.329 | 0.357 | 0.091 | 0.282 | 0.349 | 5.20  | 0.57 | 1.86  | 0.19 |
| META1_2148 | 30S ribosomal subunit protein S12                        | 0.623  | 0.476 | 0.643 | 0.609 | 0.618 | 0.685  | 0.600 | 0.406 | 0.516 | 0.572 | 0.645 | 0.504 | 1.19  | 0.40 | 1.17  | 0.12 |
| META1_2149 | 30S ribosomal subunit protein S7                         | 1.441  | 0.929 | 0.693 | 2.299 | 1.781 | 1.418  | 1.950 | 1.508 | 2.362 | 0.962 | 1.703 | 1.936 | 2.72  | 0.05 | 1.70  | 0.77 |
| META1_2150 | protein chain elongation factor EF-G, GTP-binding        | 8.294  | 6.548 | 8.165 | 9.063 | 9.121 | 9.167  | 6.898 | 6.997 | 5.617 | 7.548 | 9.132 | 6.499 | 1.16  | 0.19 | 1.07  | 0.01 |
| META1_2151 | protein chain elongation factor EF-Tu; GTP-binding fact  | 10.007 | 5.801 | 6.804 | 8.860 | 9.739 | 10.656 | 7.798 | 8.215 | 8.157 | 7.149 | 9.999 | 8.065 | 1.52  | 0.60 | 1.21  | 0.03 |
| META1_2152 | 30S ribosomal subunit protein S10                        | 0.779  | 0.498 | 0.445 | 0.744 | 1.259 | 1.040  | 1.243 | 1.295 | 1.449 | 0.544 | 1.089 | 1.331 | 3.30  | 0.01 | 1.83  | 0.14 |
| META1_2153 | 50S ribosomal subunit protein L3                         | 1.363  | 1.495 | 1.485 | 2.029 | 1.069 | 1.843  | 1.500 | 1.643 | 1.806 | 1.461 | 1.542 | 1.653 | 1.53  | 0.10 | 1.61  | 0.87 |
| META1_2154 | 50S ribosomal subunit protein L4, regulates expression   | 1.752  | 1.020 | 1.188 | 2.164 | 0.879 | 1.725  | 1.200 | 1.527 | 1.627 | 1.252 | 1.431 | 1.458 | 1.57  | 0.58 | 1.53  | 0.92 |
| META1_2155 | 50S ribosomal subunit protein L23                        | 0.623  | 0.363 | 0.495 | 0.541 | 0.285 | 0.303  | 0.600 | 0.715 | 1.111 | 0.472 | 0.343 | 0.813 | 2.33  | 0.12 | 3.56  | 0.05 |
| META1_2156 | 50S ribosomal subunit protein L2                         | 2.648  | 1.654 | 1.955 | 2.502 | 1.306 | 2.953  | 1.288 | 2.107 | 2.104 | 1.996 | 2.027 | 1.766 | 1.39  | 0.90 | 1.41  | 0.88 |
| META1_2157 | 30S ribosomal subunit protein S19                        | 0.584  | 0.657 | 0.718 | 0.609 | 0.926 | 0.827  | 0.643 | 0.522 | 0.774 | 0.662 | 0.837 | 0.645 | 1.32  | 0.89 | 1.16  | 0.31 |
| META1_2158 | 50S ribosomal subunit protein L22                        | 0.779  | 0.748 | 0.718 | 1.285 | 1.235 | 1.394  | 1.178 | 1.044 | 1.429 | 0.744 | 1.310 | 1.216 | 2.21  | 0.01 | 1.39  | 0.48 |
| META1_2159 | 30S ribosomal subunit protein S3                         | 2.336  | 1.314 | 1.163 | 1.758 | 0.879 | 2.339  | 1.628 | 1.972 | 1.608 | 1.497 | 1.633 | 1.741 | 1.57  | 0.61 | 1.60  | 0.71 |
| META1_2160 | 50S ribosomal subunit protein L16                        | 0.779  | 0.340 | 0.223 | 0.947 | 0.998 | 0.827  | 0.793 | 0.850 | 1.012 | 0.399 | 0.917 | 0.887 | 3.00  | 0.09 | 1.45  | 0.65 |
| META1_2161 | 50S ribosomal subunit protein L29                        | 0.428  | 0.249 | 0.470 | 0.338 | 0.309 | 0.496  | 0.321 | 0.232 | 0.456 | 0.372 | 0.393 | 0.336 | 1.22  | 0.67 | 1.28  | 0.60 |
| META1_2162 | 30S ribosomal subunit protein S17                        | 1.207  | 0.838 | 0.767 | 0.271 | 1.188 | 1.040  | 1.350 | 1.024 | 1.647 | 0.898 | 0.988 | 1.337 | 2.01  | 0.14 | 2.03  | 0.26 |
| META1_2164 | conserved protein of unknown function                    | 0.000  | 0.091 | 0.049 | 0.000 | 0.071 | 0.071  | 0.107 | 0.097 | 0.079 | 0.054 | 0.060 | 0.094 | 2.33  | 0.42 | 2.33  | 0.41 |
| META1_2165 | transcriptional regulator, MarR family                   | 0.000  | 0.000 | 0.000 | 0.000 | 0.095 | 0.000  | 0.086 | 0.039 | 0.040 | 0.000 | 0.040 | 0.054 | n.d.  | 0.00 | 2.00  | 0.09 |
| META1_2166 | 50S ribosomal subunit protein L17                        | 1.168  | 0.838 | 0.916 | 1.961 | 1.829 | 1.937  | 2.249 | 1.778 | 2.203 | 0.943 | 1.895 | 2.070 | 2.96  | 0.00 | 1.64  | 0.37 |
| META1_2167 | DNA-directed RNA polymerase alpha chain (RNAP alpha      | 1.402  | 1.178 | 1.485 | 1.961 | 1.615 | 2.103  | 1.585 | 1.334 | 1.469 | 1.343 | 1.875 | 1.458 | 1.47  | 0.41 | 1.17  | 0.05 |
| META1_2168 | put                                                      |        |       |       |       |       |        |       |       |       |       |       |       |       |      |       |      |

|            |                                                                |       |       |       |       |       |       |       |       |       |       |       |       |       |      |      |      |
|------------|----------------------------------------------------------------|-------|-------|-------|-------|-------|-------|-------|-------|-------|-------|-------|-------|-------|------|------|------|
| META1_2263 | phosphoribosyl c-AMP cyclohydrolase                            | 0.156 | 0.136 | 0.000 | 0.000 | 0.143 | 0.000 | 0.086 | 0.077 | 0.119 | 0.091 | 0.060 | 0.094 | 1.40  | 0.31 | 2.33 | 0.10 |
| META1_2264 | GTP cyclohydrolase I                                           | 0.234 | 0.363 | 0.421 | 0.609 | 0.190 | 0.378 | 0.578 | 0.503 | 0.456 | 0.354 | 0.333 | 0.511 | 1.95  | 0.08 | 2.30 | 0.34 |
| META1_2266 | conserved protein of unknown function                          | 0.000 | 0.000 | 0.000 | 0.000 | 0.048 | 0.000 | 0.064 | 0.039 | 0.119 | 0.000 | 0.020 | 0.074 | n.d.  | 0.00 | 5.50 | 0.13 |
| META1_2268 | conserved protein of unknown function; putative inner          | 0.195 | 0.159 | 0.272 | 0.000 | 0.475 | 0.189 | 0.214 | 0.174 | 0.179 | 0.209 | 0.282 | 0.188 | 1.22  | 0.67 | 1.00 | 0.31 |
| META1_2269 | conserved protein of unknown function; DUF214; putative        | 0.156 | 0.159 | 0.247 | 0.000 | 0.143 | 0.071 | 0.150 | 0.193 | 0.179 | 0.191 | 0.091 | 0.175 | 1.24  | 0.76 | 2.00 | 0.46 |
| META1_2271 | pyridoxal phosphate biosynthetic protein pdxI (PNP synthetase) | 0.350 | 0.385 | 0.346 | 0.473 | 0.000 | 0.165 | 0.236 | 0.367 | 0.278 | 0.363 | 0.317 | 0.216 | 1.10  | 0.17 | 3.14 | 0.36 |
| META1_2272 | holo-[acyl-carrier-protein] synthase 1                         | 0.000 | 0.000 | 0.000 | 0.000 | 0.095 | 0.142 | 0.000 | 0.058 | 0.000 | 0.000 | 0.101 | 0.020 | n.d.  | 0.37 | 0.30 | 0.56 |
| META1_2273 | signal peptidase I (SPase I) (leader peptidase I)              | 0.428 | 0.340 | 0.346 | 0.338 | 0.190 | 0.425 | 0.300 | 0.232 | 0.258 | 0.363 | 0.312 | 0.262 | 0.98  | 0.03 | 1.26 | 0.61 |
| META1_2274 | ribonuclease III                                               | 0.000 | 0.113 | 0.148 | 0.203 | 0.000 | 0.047 | 0.129 | 0.174 | 0.099 | 0.100 | 0.050 | 0.134 | 1.82  | 0.38 | 4.00 | 0.42 |
| META1_2275 | GTP-binding protein                                            | 0.195 | 0.408 | 0.371 | 0.203 | 0.404 | 0.496 | 0.279 | 0.348 | 0.218 | 0.345 | 0.413 | 0.282 | 1.11  | 0.70 | 1.02 | 0.51 |
| META1_2276 | putative methyltransferase                                     | 0.156 | 0.113 | 0.000 | 0.135 | 0.190 | 0.236 | 0.279 | 0.271 | 0.238 | 0.082 | 0.202 | 0.262 | 4.33  | 0.48 | 1.95 | 0.10 |
| META1_2277 | 16S rRNA pseudouridylylate 516 synthase                        | 0.000 | 0.000 | 0.000 | 0.135 | 0.095 | 0.071 | 0.086 | 0.155 | 0.179 | 0.000 | 0.091 | 0.141 | n.d.  | 0.00 | 2.33 | 0.34 |
| META1_2282 | protein of unknown function; putative exported protein         | 0.117 | 0.181 | 0.297 | 0.271 | 0.048 | 0.118 | 0.236 | 0.135 | 0.218 | 0.209 | 0.111 | 0.195 | 1.26  | 0.92 | 2.64 | 0.39 |
| META1_2284 | protein of unknown function; putative exported protein         | 0.000 | 0.000 | 0.000 | 0.000 | 0.071 | 0.000 | 0.000 | 0.077 | 0.060 | 0.000 | 0.030 | 0.047 | n.d.  | 0.12 | 2.33 | 0.52 |
| META1_2285 | (d)inucleoside polyphosphate hydrolase (Nudix family)          | 0.117 | 0.113 | 0.049 | 0.000 | 0.095 | 0.165 | 0.064 | 0.058 | 0.000 | 0.091 | 0.111 | 0.040 | 0.60  | 0.42 | 0.55 | 0.92 |
| META1_2288 | putative periplasmic carboxyl-terminal processing prote        | 1.402 | 1.790 | 1.732 | 1.488 | 1.568 | 1.488 | 0.471 | 0.870 | 0.734 | 1.678 | 1.522 | 0.699 | 0.56  | 0.01 | 0.69 | 0.01 |
| META1_2289 | Putative membrane-bound metalloprotease                        | 0.000 | 0.000 | 0.000 | 0.000 | 0.199 | 0.071 | 0.000 | 0.039 | 0.040 | 0.000 | 0.081 | 0.027 | n.d.  | 0.12 | 0.50 | 0.91 |
| META1_2290 | conserved protein of unknown function                          | 0.000 | 0.045 | 0.000 | 0.000 | 0.048 | 0.000 | 0.000 | 0.097 | 0.119 | 0.018 | 0.020 | 0.074 | 5.50  | 0.57 | 5.50 | 0.57 |
| META1_2293 | periplasmic oxidoreductase, DsbA family                        | 0.195 | 0.159 | 0.198 | 0.135 | 0.095 | 0.071 | 0.236 | 0.135 | 0.079 | 0.181 | 0.091 | 0.148 | 1.10  | 0.41 | 2.44 | 0.40 |
| META1_2294 | argininosuccinate synthase (citrulline-aspartate ligase)       | 1.324 | 1.042 | 1.212 | 0.812 | 1.093 | 1.252 | 0.943 | 0.986 | 1.032 | 1.170 | 1.119 | 0.988 | 1.14  | 0.07 | 1.32 | 0.73 |
| META1_2296 | conserved protein of unknown function                          | 0.273 | 0.408 | 0.099 | 0.406 | 0.095 | 0.402 | 0.171 | 0.213 | 0.318 | 0.263 | 0.272 | 0.235 | 1.21  | 0.97 | 1.30 | 0.86 |
| META1_2297 | putative phosphoglycolate phosphatase, putative haloal         | 0.078 | 0.000 | 0.000 | 0.271 | 0.214 | 0.260 | 0.236 | 0.193 | 0.079 | 0.018 | 0.242 | 0.168 | 12.50 | 0.15 | 1.04 | 0.24 |
| META1_2298 | protein of unknown function                                    | 0.117 | 0.068 | 0.049 | 0.000 | 0.095 | 0.047 | 0.107 | 0.058 | 0.119 | 0.073 | 0.060 | 0.094 | 1.75  | 0.56 | 2.33 | 0.42 |
| META1_2299 | Ribose-5-phosphate isomerase A                                 | 0.117 | 0.136 | 0.173 | 0.203 | 0.214 | 0.307 | 0.150 | 0.232 | 0.218 | 0.145 | 0.252 | 0.202 | 1.88  | 0.13 | 1.20 | 0.38 |
| META1_2300 | conserved protein of unknown function; putative export         | 0.195 | 0.249 | 0.148 | 0.541 | 0.570 | 0.402 | 0.386 | 0.445 | 0.476 | 0.200 | 0.494 | 0.437 | 2.95  | 0.01 | 1.33 | 0.33 |
| META1_2302 | glutathione reductase                                          | 0.117 | 0.363 | 0.371 | 0.135 | 0.451 | 0.378 | 0.407 | 0.445 | 0.556 | 0.308 | 0.373 | 0.470 | 2.06  | 0.19 | 1.89 | 0.27 |
| META1_2305 | osmotically inducible protein OsmC                             | 0.896 | 0.770 | 0.619 | 0.676 | 0.285 | 0.260 | 0.300 | 0.329 | 0.496 | 0.744 | 0.333 | 0.376 | 0.68  | 0.02 | 1.70 | 0.98 |
| META1_2308 | putative zink-containing alcohol dehydrogenase                 | 0.000 | 0.227 | 0.000 | 0.000 | 0.000 | 0.000 | 0.000 | 0.000 | 0.000 | 0.091 | 0.000 | 0.000 | 0.00  | 0.37 | n.d. | n.d. |
| META1_2309 | conserved protein of unknown function                          | 0.000 | 0.068 | 0.000 | 0.000 | 0.000 | 0.000 | 0.000 | 0.000 | 0.000 | 0.027 | 0.000 | 0.000 | 0.00  | 0.37 | n.d. | n.d. |
| META1_2313 | putative glutathione S-transferase                             | 0.701 | 0.498 | 0.396 | 0.000 | 0.190 | 0.118 | 0.364 | 0.348 | 0.258 | 0.508 | 0.131 | 0.323 | 0.86  | 0.07 | 3.69 | 0.50 |
| META1_2314 | protein of unknown function                                    | 0.000 | 0.045 | 0.000 | 0.000 | 0.000 | 0.000 | 0.000 | 0.000 | 0.000 | 0.018 | 0.000 | 0.000 | 0.00  | 0.37 | n.d. | n.d. |
| META1_2315 | putative catalase precursor                                    | 0.623 | 0.634 | 0.792 | 0.676 | 0.546 | 0.662 | 0.428 | 0.599 | 0.456 | 0.689 | 0.615 | 0.497 | 0.97  | 0.06 | 1.21 | 0.12 |
| META1_2316 | conserved protein of unknown function                          | 0.000 | 0.000 | 0.000 | 0.000 | 0.095 | 0.095 | 0.129 | 0.174 | 0.079 | 0.000 | 0.081 | 0.128 | n.d.  | 0.00 | 2.38 | 0.41 |
| META1_2317 | Nitroreductase family protein                                  | 0.312 | 0.159 | 0.223 | 0.338 | 0.309 | 0.307 | 0.279 | 0.309 | 0.159 | 0.218 | 0.312 | 0.249 | 1.54  | 0.81 | 1.19 | 0.25 |
| META1_2323 | threonine tRNA synthetase                                      | 0.779 | 0.838 | 1.386 | 0.406 | 1.164 | 0.969 | 0.964 | 0.870 | 0.754 | 1.025 | 0.968 | 0.860 | 1.13  | 0.57 | 1.33 | 0.76 |
| META1_2324 | protein of unknown function                                    | 0.000 | 0.000 | 0.000 | 0.000 | 0.000 | 0.000 | 0.043 | 0.000 | 0.000 | 0.000 | 0.000 | 0.013 | n.d.  | 0.37 | n.d. | 0.37 |
| META1_2325 | putative kinase (mak-like)/transcriptional regulator, ac       | 0.000 | 0.000 | 0.074 | 0.000 | 0.000 | 0.000 | 0.000 | 0.058 | 0.099 | 0.027 | 0.000 | 0.054 | 2.67  | 0.52 | n.d. | 0.12 |
| META1_2326 | sodium/dicarboxylate symporter (DAACS family)                  | 1.168 | 1.065 | 0.990 | 0.000 | 0.475 | 0.520 | 0.643 | 0.541 | 0.615 | 1.061 | 0.423 | 0.598 | 0.76  | 0.00 | 2.12 | 0.41 |
| META1_2327 | isoleucine tRNA synthetase                                     | 1.207 | 1.337 | 1.336 | 1.623 | 1.473 | 1.110 | 1.671 | 1.682 | 1.369 | 1.306 | 1.341 | 1.573 | 1.63  | 0.06 | 1.76 | 0.40 |
| META1_2329 | conserved protein of unknown function; putative export         | 0.117 | 0.204 | 0.247 | 0.271 | 0.166 | 0.095 | 0.171 | 0.193 | 0.218 | 0.200 | 0.151 | 0.195 | 1.62  | 0.79 | 1.93 | 0.60 |
| META1_2330 | putative protease                                              | 0.117 | 0.249 | 0.173 | 0.135 | 0.665 | 0.473 | 0.321 | 0.483 | 0.278 | 0.191 | 0.504 | 0.363 | 2.57  | 0.06 | 1.08 | 0.99 |
| META1_2331 | putative protease                                              | 0.662 | 0.634 | 0.619 | 0.473 | 0.618 | 0.921 | 0.557 | 0.464 | 0.476 | 0.635 | 0.726 | 0.497 | 1.06  | 0.01 | 1.03 | 0.27 |
| META1_2332 | putative lipase (ypfA)                                         | 0.130 | 0.223 | 0.143 | 0.000 | 0.142 | 0.343 | 0.136 | 0.132 | 0.242 | 0.136 | 0.131 | 0.242 | 0.97  | 0.36 | 2.77 | 0.44 |
| META1_2334 | ferredoxin-NADP+ reductase                                     | 0.779 | 0.431 | 0.272 | 0.676 | 0.499 | 0.874 | 0.664 | 0.850 | 0.476 | 0.454 | 0.685 | 0.665 | 1.98  | 0.36 | 1.46 | 0.90 |
| META1_2335 | Dethiobiotin synthetase (Dethiobiotin synthase) (DTB s         | 0.000 | 0.091 | 0.099 | 0.000 | 0.077 | 0.047 | 0.086 | 0.077 | 0.040 | 0.073 | 0.050 | 0.067 | 1.25  | 0.32 | 2.00 | 0.39 |
| META1_2336 | protein of unknown function                                    | 0.117 | 0.113 | 0.000 | 0.000 | 0.143 | 0.000 | 0.000 | 0.058 | 0.079 | 0.073 | 0.060 | 0.047 | 0.88  | 0.94 | 1.17 | 0.47 |
| META1_2339 | WD-40 repeat family protein                                    | 0.350 | 0.272 | 0.247 | 0.406 | 0.285 | 0.213 | 0.193 | 0.271 | 0.218 | 0.281 | 0.272 | 0.228 | 1.10  | 0.17 | 1.26 | 0.29 |
| META1_2341 | conserved protein of unknown function; putative export         | 0.000 | 0.000 | 0.000 | 0.135 | 0.071 | 0.047 | 0.064 | 0.058 | 0.079 | 0.000 | 0.071 | 0.067 | n.d.  | 0.00 | 1.43 | 0.68 |
| META1_2342 | protein of unknown function; putative membrane prote           | 0.000 | 0.136 | 0.000 | 0.000 | 0.143 | 0.000 | 0.043 | 0.000 | 0.000 | 0.054 | 0.060 | 0.013 | 0.33  | 0.94 | 0.33 | 0.93 |
| META1_2344 | putative Pyrimidine 5-nucleotidase (HAD-superfamily h          | 0.000 | 0.000 | 0.000 | 0.000 | 0.000 | 0.071 | 0.000 | 0.039 | 0.000 | 0.000 | 0.030 | 0.013 | n.d.  | 0.37 | 0.67 | 0.97 |
| META1_2345 | acetylglutamate kinase                                         | 1.012 | 0.793 | 0.445 | 0.744 | 0.356 | 1.134 | 0.750 | 0.966 | 0.933 | 0.717 | 0.746 | 0.887 | 1.67  | 0.45 | 1.78 | 0.48 |
| META1_2347 | MOSC (sulfur-carrier) domain protein                           | 0.000 | 0.000 | 0.074 | 0.000 | 0.000 | 0.118 | 0.086 | 0.077 | 0.040 | 0.027 | 0.050 | 0.067 | 3.33  | 0.11 | 2.00 | 0.09 |
| META1_2349 | protein disaggregation chaperone                               | 1.207 | 1.405 | 1.559 | 2.232 | 1.734 | 1.394 | 2.549 | 2.146 | 1.588 | 1.415 | 1.663 | 2.083 | 1.99  | 0.07 | 1.88 | 0.46 |
| META1_2350 | Metallophosphoesterase                                         | 0.000 | 0.000 | 0.000 | 0.000 | 0.000 | 0.000 | 0.000 | 0.039 | 0.000 | 0.000 | 0.000 | 0.013 | n.d.  | 0.37 | n.d. | 0.37 |
| META1_2351 | short-chain fatty acid transporter (scFAT family)              | 0.000 | 0.000 | 0.000 | 0.000 | 0.000 | 0.000 | 0.000 | 0.000 | 0.000 | 0.000 | 0.030 | 0.000 | n.d.  | n.d. | 0.00 | 0.37 |
| META1_2352 | conserved protein of unknown function precursor; puta          | 0.000 | 0.000 | 0.000 | 0.000 | 0.119 | 0.142 | 0.060 | 0.000 | 0.000 | 0.000 | 0.111 | 0.000 | n.d.  | 0.00 | 0.00 | 0.12 |
| META1_2353 | putative GTP-binding protein engB                              | 0.234 | 0.204 | 0.173 | 0.473 | 0.309 | 0.449 | 0.450 | 0.561 | 0.278 | 0.200 | 0.393 | 0.430 | 2.91  | 0.03 | 1.64 | 0.93 |
| META1_2354 | transmembrane protein, OxaA-like, preproteins transloc         | 0.857 | 1.156 | 1.311 | 0.271 | 0.998 | 0.727 | 0.728 | 0.793 | 0.814 | 1.143 | 0.776 | 0.780 | 0.92  | 0.06 | 1.51 | 0.51 |
| META1_2355 | ribonuclease P protein component (RNaseP protein, RN           | 0.000 | 0.000 | 0.000 | 0.000 | 0.071 | 0.000 | 0.064 | 0.058 | 0.060 | 0.000 | 0.030 | 0.060 | n.d.  | 0.00 | 3.00 | 0.11 |
| META1_2356 | 50S ribosomal subunit protein L34                              | 0.000 | 0.000 | 0.000 | 0.000 | 0.000 | 0.000 | 0.043 | 0.000 | 0.000 | 0.000 | 0.000 | 0.013 | n.d.  | 0.37 | n.d. | 0.37 |
| META1_2357 | putative transcriptional regulator, AraC family                | 0.156 | 0.113 | 0.099 | 0.000 | 0.166 | 0.118 | 0.214 | 0.174 | 0.179 | 0.118 | 0.121 | 0.188 | 2.15  | 0.04 | 2.33 | 0.42 |
| META1_2358 | 50S ribosomal protein L31                                      | 0.467 | 0.544 | 0.718 | 0.406 | 0.428 | 0.473 | 0.643 | 0.406 | 0.893 | 0.590 | 0.443 | 0.645 | 1.48  | 0.77 | 2.18 | 0.21 |
| META1_2359 | putative ABC transporter related, fused ATPase and tra         | 0.000 | 0.498 | 0.544 | 0.473 | 0.831 | 0.638 | 0.428 | 0.425 | 0.476 | 0.399 | 0.695 | 0.444 | 1.50  | 0.35 | 0.96 | 0.10 |
| META1_2360 | D-cysteine desulfhydrase, PLP-dependent enzyme                 | 0.156 | 0.181 | 0.124 | 0.135 | 0.309 | 0.449 | 0.300 | 0.213 | 0.159 | 0.154 | 0.343 | 0.222 | 1.94  | 0.17 | 0.97 | 0.63 |
| META1_2361 | flagellar motor protein MotB                                   | 0.078 | 0.068 | 0.074 | 0.000 | 0.071 | 0.118 | 0.043 | 0.058 | 0.079 | 0.073 | 0.081 | 0.060 | 1.13  | 0.28 | 1.13 | 0.32 |
| META1_2362 | conserved protein of unknown function; putative mem            | 0.000 | 0.000 | 0.124 | 0.271 | 0.190 | 0.165 | 0.214 | 0.155 | 0.119 | 0.045 | 0.192 | 0.161 | 4.80  | 0.13 | 1.26 | 0.32 |
| META1_2363 | conserved protein of unknown function                          | 0.350 | 0.181 | 0     |       |       |       |       |       |       |       |       |       |       |      |      |      |

|            |                                                                  |       |       |       |       |       |       |       |       |       |       |       |       |       |      |       |      |
|------------|------------------------------------------------------------------|-------|-------|-------|-------|-------|-------|-------|-------|-------|-------|-------|-------|-------|------|-------|------|
| META1_2455 | conserved protein of unknown function                            | 0.000 | 0.000 | 0.000 | 0.000 | 0.095 | 0.071 | 0.000 | 0.077 | 0.000 | 0.000 | 0.071 | 0.027 | n.d.  | 0.37 | 0.57  | 0.52 |
| META1_2459 | conserved protein of unknown function; putative mem              | 1.207 | 0.725 | 0.495 | 0.338 | 0.143 | 0.236 | 0.214 | 0.290 | 0.238 | 0.753 | 0.212 | 0.249 | 0.45  | 0.01 | 1.76  | 0.76 |
| META1_2460 | conserved protein of unknown function                            | 0.195 | 0.363 | 0.693 | 0.271 | 0.166 | 0.189 | 0.300 | 0.271 | 0.337 | 0.445 | 0.192 | 0.302 | 0.92  | 0.63 | 2.37  | 0.07 |
| META1_2461 | conserved protein of unknown function; putative export           | 0.545 | 0.770 | 0.148 | 0.203 | 0.000 | 0.000 | 0.300 | 0.329 | 0.377 | 0.490 | 0.030 | 0.336 | 0.93  | 0.75 | 16.67 | 0.11 |
| META1_2462 | 3'-5' exonuclease                                                | 0.078 | 0.159 | 0.099 | 0.135 | 0.048 | 0.095 | 0.150 | 0.232 | 0.099 | 0.118 | 0.081 | 0.161 | 1.85  | 0.34 | 3.00  | 0.24 |
| META1_2464 | conserved protein of unknown function; putative export           | 0.000 | 0.000 | 0.000 | 0.000 | 0.005 | 0.006 | 0.058 | 0.079 | 0.000 | 0.000 | 0.060 | 0.074 | n.d.  | 0.00 | 1.83  | 0.39 |
| META1_2465 | putative ABC transporter; ATPase                                 | 0.000 | 0.068 | 0.049 | 0.000 | 0.000 | 0.071 | 0.086 | 0.116 | 0.060 | 0.045 | 0.030 | 0.087 | 2.60  | 0.43 | 4.33  | 0.12 |
| META1_2466 | sigma N (sigma 54) factor of RNA polymerase                      | 0.000 | 0.045 | 0.074 | 0.000 | 0.000 | 0.000 | 0.000 | 0.116 | 0.060 | 0.045 | 0.000 | 0.060 | 1.80  | 0.96 | n.d.  | 0.12 |
| META1_2467 | ribosomal subunit interface protein, sigma 54 (RpoN)             | 0.234 | 0.317 | 0.148 | 0.203 | 0.000 | 0.095 | 0.171 | 0.155 | 0.179 | 0.236 | 0.071 | 0.168 | 0.96  | 0.28 | 3.57  | 0.40 |
| META1_2468 | sugar-specific enzyme IIA component of PTS                       | 0.195 | 0.227 | 0.198 | 0.000 | 0.261 | 0.284 | 0.643 | 0.348 | 0.536 | 0.209 | 0.232 | 0.504 | 3.26  | 0.01 | 3.26  | 0.48 |
| META1_2469 | protein of unknown function; putative exported protein           | 0.117 | 0.227 | 0.124 | 0.000 | 0.143 | 0.165 | 0.150 | 0.097 | 0.119 | 0.163 | 0.131 | 0.121 | 1.00  | 0.44 | 1.38  | 0.34 |
| META1_2470 | Mg chelatase subunit Bchl, participate to introduce Mg           | 0.000 | 0.091 | 0.090 | 0.000 | 0.000 | 0.000 | 0.064 | 0.058 | 0.060 | 0.073 | 0.000 | 0.060 | 1.13  | 0.32 | n.d.  | 0.00 |
| META1_2472 | phosphoglyceromutase                                             | 0.935 | 0.997 | 0.693 | 0.541 | 0.404 | 0.756 | 0.600 | 0.638 | 0.397 | 0.871 | 0.575 | 0.544 | 0.84  | 0.06 | 1.42  | 0.91 |
| META1_2473 | dihydrodipicolinate reductase                                    | 0.428 | 0.566 | 0.520 | 0.338 | 0.546 | 0.591 | 0.814 | 0.735 | 0.476 | 0.517 | 0.534 | 0.672 | 1.75  | 0.21 | 1.89  | 0.25 |
| META1_2475 | conserved protein of unknown function                            | 0.156 | 0.068 | 0.000 | 0.135 | 0.048 | 0.118 | 0.000 | 0.058 | 0.040 | 0.064 | 0.091 | 0.034 | 0.71  | 0.92 | 0.56  | 0.47 |
| META1_2476 | putative hydroxycyglutathione hydrolase (gloB-like)              | 0.273 | 0.295 | 0.322 | 0.000 | 0.095 | 0.213 | 0.193 | 0.213 | 0.198 | 0.299 | 0.131 | 0.202 | 0.91  | 0.00 | 2.31  | 0.43 |
| META1_2481 | putative oligopeptide transporter subunit ; permease c           | 0.000 | 0.000 | 0.000 | 0.000 | 0.000 | 0.047 | 0.000 | 0.000 | 0.000 | 0.000 | 0.020 | 0.000 | n.d.  | n.d. | 0.00  | 0.37 |
| META1_2482 | protein of unknown function                                      | 0.000 | 0.000 | 0.049 | 0.000 | 0.000 | 0.000 | 0.064 | 0.039 | 0.040 | 0.018 | 0.000 | 0.047 | 3.50  | 0.11 | n.d.  | 0.00 |
| META1_2483 | putative aminotransferase (putative ybdL)                        | 0.000 | 0.000 | 0.000 | 0.000 | 0.119 | 0.095 | 0.064 | 0.077 | 0.000 | 0.000 | 0.091 | 0.047 | n.d.  | 0.12 | 0.78  | 0.95 |
| META1_2485 | conserved protein of unknown function                            | 0.000 | 0.000 | 0.000 | 0.000 | 0.000 | 0.000 | 0.043 | 0.000 | 0.000 | 0.000 | 0.000 | 0.013 | n.d.  | 0.37 | n.d.  | 0.37 |
| META1_2486 | multidrug efflux protein, subunit A; RND efflux transpor         | 0.000 | 0.000 | 0.000 | 0.000 | 0.000 | 0.000 | 0.086 | 0.116 | 0.119 | 0.000 | 0.000 | 0.108 | n.d.  | 0.00 | n.d.  | 0.00 |
| META1_2487 | multidrug efflux protein, subunit B; RND efflux transpor         | 0.000 | 0.045 | 0.000 | 0.000 | 0.000 | 0.000 | 0.129 | 0.174 | 0.198 | 0.018 | 0.000 | 0.168 | 12.50 | 0.18 | n.d.  | 0.00 |
| META1_2488 | multidrug efflux system, subunit C; RND efflux exporte           | 0.000 | 0.000 | 0.000 | 0.000 | 0.000 | 0.000 | 0.064 | 0.097 | 0.139 | 0.000 | 0.000 | 0.101 | n.d.  | 0.00 | n.d.  | 0.00 |
| META1_2489 | putative outer membrane lipoprotein precursor                    | 0.000 | 0.000 | 0.000 | 0.000 | 0.166 | 0.142 | 0.000 | 0.039 | 0.000 | 0.000 | 0.131 | 0.013 | n.d.  | 0.37 | 0.15  | 0.61 |
| META1_2490 | glucose-6-phosphate 1-dehydrogenase                              | 0.000 | 0.249 | 0.272 | 0.000 | 0.000 | 0.000 | 0.000 | 0.000 | 0.000 | 0.200 | 0.000 | 0.000 | 0.00  | 0.12 | n.d.  | n.d. |
| META1_2491 | 3-isopropylmalate dehydrogenase                                  | 1.246 | 1.042 | 1.188 | 1.353 | 1.710 | 2.103 | 1.200 | 1.372 | 1.012 | 1.143 | 1.824 | 1.196 | 1.41  | 0.81 | 0.98  | 0.08 |
| META1_2492 | protein of unknown function                                      | 0.000 | 0.091 | 0.099 | 0.000 | 0.000 | 0.071 | 0.000 | 0.000 | 0.000 | 0.073 | 0.030 | 0.000 | 0.00  | 0.12 | 0.00  | 0.37 |
| META1_2493 | protein of unknown function                                      | 0.000 | 0.000 | 0.000 | 0.000 | 0.000 | 0.047 | 0.000 | 0.000 | 0.000 | 0.000 | 0.020 | 0.000 | n.d.  | n.d. | 0.00  | 0.37 |
| META1_2494 | Putative decarboxylase, Thiamine pyrophosphate-requi             | 0.156 | 0.521 | 0.594 | 0.271 | 0.143 | 0.118 | 0.107 | 0.193 | 0.258 | 0.463 | 0.151 | 0.188 | 0.55  | 0.22 | 1.87  | 0.89 |
| META1_2496 | geranyltranstransferase (farnesyl-diphosphate synthas            | 0.662 | 0.340 | 0.371 | 0.676 | 0.523 | 0.780 | 0.364 | 0.503 | 0.476 | 0.426 | 0.655 | 0.450 | 1.43  | 0.95 | 1.03  | 0.07 |
| META1_2498 | deoxyribodipyrimidine photolyase (DNA photolyase)                | 0.000 | 0.000 | 0.000 | 0.000 | 0.000 | 0.000 | 0.043 | 0.000 | 0.000 | 0.000 | 0.000 | 0.013 | n.d.  | 0.37 | n.d.  | 0.37 |
| META1_2499 | putative extracellular solute-binding protein family 7, t        | 0.195 | 0.159 | 0.272 | 0.203 | 0.428 | 0.260 | 0.129 | 0.077 | 0.099 | 0.209 | 0.323 | 0.101 | 0.65  | 0.03 | 0.47  | 0.02 |
| META1_2500 | conserved protein of unknown function; putative phosph           | 0.000 | 0.000 | 0.000 | 0.000 | 0.048 | 0.000 | 0.000 | 0.000 | 0.000 | 0.000 | 0.020 | 0.000 | n.d.  | n.d. | 0.00  | 0.37 |
| META1_2501 | putative extracellular ligand-binding receptor precursor         | 0.078 | 0.091 | 0.099 | 0.000 | 0.190 | 0.095 | 0.086 | 0.155 | 0.159 | 0.091 | 0.121 | 0.134 | 2.00  | 0.16 | 1.67  | 0.37 |
| META1_2502 | putative capsule polysaccharide export outer membran             | 0.312 | 0.000 | 0.148 | 0.338 | 0.119 | 0.095 | 0.064 | 0.000 | 0.000 | 0.127 | 0.141 | 0.020 | 0.21  | 0.60 | 0.21  | 0.16 |
| META1_2503 | putative Capsular polysaccharide biosynthesis protein            | 0.000 | 0.091 | 0.049 | 0.000 | 0.000 | 0.000 | 0.000 | 0.000 | 0.000 | 0.054 | 0.000 | 0.000 | 0.00  | 0.12 | n.d.  | n.d. |
| META1_2504 | protein of unknown function                                      | 0.000 | 0.068 | 0.173 | 0.000 | 0.143 | 0.000 | 0.150 | 0.232 | 0.119 | 0.091 | 0.060 | 0.168 | 2.50  | 0.44 | 4.17  | 0.12 |
| META1_2506 | Putative oxidoreductase, short-chain dehydrogenase/re            | 0.000 | 0.000 | 0.000 | 0.135 | 0.000 | 0.000 | 0.107 | 0.174 | 0.079 | 0.000 | 0.020 | 0.121 | n.d.  | 0.00 | 9.00  | 0.11 |
| META1_2507 | putative Methionyl-tRNA formyltransferase (partial)              | 0.000 | 0.000 | 0.000 | 0.000 | 0.000 | 0.000 | 0.000 | 0.077 | 0.060 | 0.000 | 0.000 | 0.047 | n.d.  | 0.12 | n.d.  | 0.12 |
| META1_2508 | Trans-sulfuration enzyme (O-acetylhomoserine aminoc              | 1.129 | 0.770 | 1.089 | 0.338 | 0.903 | 0.780 | 0.621 | 0.638 | 0.337 | 0.971 | 0.766 | 0.531 | 0.74  | 0.05 | 1.04  | 0.63 |
| META1_2509 | Ubiquinol-cytochrome c reductase complex, iron-sulfur            | 0.428 | 0.431 | 0.297 | 0.473 | 0.594 | 0.543 | 1.028 | 0.812 | 0.695 | 0.381 | 0.554 | 0.840 | 2.98  | 0.01 | 2.27  | 0.03 |
| META1_2510 | Ubiquinol-cytochrome c reductase complex, cytochrom              | 0.389 | 1.065 | 1.064 | 0.879 | 0.950 | 1.181 | 1.114 | 0.773 | 0.973 | 0.907 | 1.038 | 0.948 | 1.41  | 0.58 | 1.37  | 0.71 |
| META1_2511 | Ubiquinol-cytochrome c reductase complex, cytochrom              | 1.122 | 0.512 | 0.643 | 0.780 | 0.814 | 0.599 | 0.614 | 0.599 | 0.609 | 0.771 | 0.746 | 0.599 | 1.12  | 0.63 | 1.41  | 0.48 |
| META1_2512 | putative 5'-methylthioadenosine phosphorylase (mtmP)             | 0.273 | 0.385 | 0.322 | 0.473 | 0.095 | 0.307 | 0.386 | 0.309 | 0.318 | 0.336 | 0.242 | 0.336 | 1.35  | 0.77 | 2.08  | 0.53 |
| META1_2513 | conserved protein of unknown function; putative export           | 0.000 | 0.045 | 0.000 | 0.000 | 0.071 | 0.047 | 0.129 | 0.000 | 0.099 | 0.018 | 0.050 | 0.074 | 5.50  | 0.58 | 2.20  | 0.93 |
| META1_2515 | imidazoleglycerol-phosphate dehydratase                          | 0.350 | 0.136 | 0.148 | 0.271 | 0.238 | 0.284 | 0.171 | 0.213 | 0.238 | 0.191 | 0.262 | 0.208 | 1.48  | 0.84 | 1.19  | 0.09 |
| META1_2516 | conserved protein of unknown function                            | 0.312 | 0.249 | 0.148 | 0.203 | 0.166 | 0.118 | 0.129 | 0.116 | 0.179 | 0.227 | 0.151 | 0.141 | 0.84  | 0.13 | 1.40  | 0.55 |
| META1_2517 | glutamine amidotransferase, subunit with HisF                    | 0.312 | 0.363 | 0.198 | 0.271 | 0.190 | 0.354 | 0.279 | 0.348 | 0.198 | 0.290 | 0.272 | 0.276 | 1.28  | 0.85 | 1.52  | 0.94 |
| META1_2518 | N-(5'-phospho-L-ribosyl-formimino)-5-amino-1-(5'-phos            | 0.545 | 0.295 | 0.371 | 0.676 | 0.261 | 0.402 | 0.514 | 0.425 | 0.278 | 0.381 | 0.383 | 0.403 | 1.43  | 0.98 | 1.58  | 0.88 |
| META1_2519 | imidazole glycerol phosphate synthase, subunit with His          | 0.428 | 0.498 | 0.322 | 0.406 | 0.285 | 0.331 | 0.471 | 0.464 | 0.218 | 0.417 | 0.323 | 0.383 | 1.24  | 0.69 | 1.78  | 0.80 |
| META1_2520 | phosphoribosyl-ATP pyrophosphatase                               | 0.350 | 0.544 | 0.718 | 0.338 | 0.285 | 0.284 | 0.150 | 0.329 | 0.357 | 0.562 | 0.292 | 0.282 | 0.68  | 0.12 | 1.45  | 0.63 |
| META1_2521 | pantothenate kinase                                              | 0.156 | 0.249 | 0.173 | 0.000 | 0.166 | 0.118 | 0.193 | 0.213 | 0.179 | 0.200 | 0.121 | 0.195 | 1.32  | 0.86 | 2.42  | 0.42 |
| META1_2524 | putative response regulator receiver (CheY-like protein)         | 0.000 | 0.045 | 0.000 | 0.000 | 0.000 | 0.000 | 0.000 | 0.000 | 0.000 | 0.018 | 0.000 | 0.000 | 0.00  | 0.37 | n.d.  | n.d. |
| META1_2528 | conserved protein of unknown function; putative exported protein | 0.000 | 0.000 | 0.000 | 0.000 | 0.000 | 0.000 | 0.000 | 0.000 | 0.040 | 0.000 | 0.000 | 0.034 | n.d.  | 0.12 | n.d.  | 0.12 |
| META1_2529 | Granule-associated 20 kDa protein (phasin)                       | 3.588 | 1.201 | 1.188 | 1.623 | 1.301 | 0.851 | 1.393 | 1.430 | 1.945 | 1.733 | 1.169 | 1.593 | 1.24  | 0.83 | 2.04  | 0.32 |
| META1_2530 | putative histidine kinase with HK Homodimeric domain             | 0.000 | 0.000 | 0.000 | 0.000 | 0.000 | 0.000 | 0.043 | 0.039 | 0.000 | 0.000 | 0.000 | 0.027 | n.d.  | 0.12 | n.d.  | 0.12 |
| META1_2531 | acetyl-CoA synthetase                                            | 4.595 | 4.554 | 4.800 | 1.623 | 1.710 | 1.418 | 3.406 | 3.595 | 3.076 | 4.654 | 1.572 | 3.360 | 0.97  | 0.00 | 3.21  | 0.00 |
| META1_2532 | conserved protein of unknown function, DUF485; putat             | 0.234 | 0.000 | 0.049 | 0.000 | 0.048 | 0.000 | 0.086 | 0.077 | 0.079 | 0.073 | 0.020 | 0.081 | 1.50  | 0.34 | 6.00  | 0.14 |
| META1_2533 | Cation/acetate symporter actP; acetate and glycylate p           | 0.818 | 1.020 | 0.916 | 0.271 | 0.570 | 0.756 | 0.514 | 0.580 | 0.595 | 0.934 | 0.605 | 0.565 | 0.82  | 0.00 | 1.40  | 0.67 |
| META1_2534 | putative MFS transporter membrane protein                        | 0.000 | 0.249 | 0.099 | 0.000 | 0.428 | 0.378 | 0.578 | 0.522 | 0.476 | 0.136 | 0.343 | 0.524 | 5.20  | 0.59 | 2.29  | 0.42 |
| META1_2535 | bifunctional: IMP cyclohydrolase (N-terminal); phospho           | 1.051 | 1.292 | 1.410 | 1.150 | 0.903 | 0.732 | 1.050 | 0.715 | 0.774 | 1.279 | 0.867 | 0.840 | 0.89  | 0.05 | 1.45  | 0.64 |
| META1_2536 | conserved protein of unknown function; putative Hepa             | 0.000 | 0.000 | 0.000 | 0.000 | 0.000 | 0.000 | 0.000 | 0.000 | 0.040 | 0.000 | 0.000 | 0.013 | n.d.  | 0.37 | n.d.  | 0.37 |
| META1_2537 | 3-mercaptopyruvate sulfurtransferase                             | 0.545 | 0.272 | 0.346 | 0.406 | 0.000 | 0.260 | 0.471 | 0.445 | 0.417 | 0.363 | 0.171 | 0.444 | 1.65  | 0.44 | 3.88  | 0.43 |
| META1_2540 | RNA helicase                                                     | 0.000 | 0.068 | 0.247 | 1.082 | 0.903 | 0.709 | 0.450 | 0.425 | 0.397 | 0.118 | 0.847 | 0.423 | 4.85  | 0.58 | 0.75  | 0.00 |
| META1_2541 | conserved protein of unknown function                            | 0.078 | 0.091 | 0.000 | 0.000 | 0.000 | 0.000 | 0.064 | 0.000 | 0.079 | 0.054 | 0.000 | 0.047 | 1.17  | 0.98 | n.d.  | 0.12 |
| META1_2542 | protein of unknown function                                      | 0.389 | 0.000 | 0.173 | 0.000 | 0.000 | 0.000 | 0.171 | 0.039 | 0.119 | 0.154 | 0.000 | 0.108 | 0.94  | 0.25 | n.d.  | 0.00 |

|            |                                                          |       |       |       |       |       |       |       |       |       |       |       |       |       |      |      |      |
|------------|----------------------------------------------------------|-------|-------|-------|-------|-------|-------|-------|-------|-------|-------|-------|-------|-------|------|------|------|
| META1_2735 | putative Fe-S oxidoreductase                             | 0.000 | 0.068 | 0.000 | 0.000 | 0.000 | 0.047 | 0.193 | 0.058 | 0.119 | 0.027 | 0.020 | 0.121 | 6.00  | 0.14 | 9.00 | 0.16 |
| META1_2736 | putative oxidoreductase, putative 4Fe-4S ferredoxin do   | 0.000 | 0.159 | 0.099 | 0.000 | 0.404 | 0.095 | 0.300 | 0.232 | 0.198 | 0.100 | 0.212 | 0.242 | 3.27  | 0.48 | 1.71 | 0.41 |
| META1_2737 | conserved protein of unknown function, DUF162            | 0.000 | 0.159 | 0.000 | 0.203 | 0.261 | 0.189 | 0.193 | 0.213 | 0.238 | 0.064 | 0.222 | 0.215 | 4.57  | 0.13 | 1.45 | 0.94 |
| META1_2738 | conserved protein of unknown function, transglutamin     | 0.156 | 0.113 | 0.099 | 0.000 | 0.000 | 0.047 | 0.000 | 0.000 | 0.060 | 0.118 | 0.020 | 0.020 | 0.23  | 0.15 | 1.50 | 0.99 |
| META1_2739 | SOS ribosomal subunit protein L13                        | 1.012 | 0.521 | 0.594 | 1.014 | 0.794 | 0.614 | 1.178 | 0.870 | 1.191 | 0.662 | 0.746 | 1.075 | 2.19  | 1.02 | 2.16 | 0.16 |
| META1_2740 | ribosomal protein S9                                     | 1.012 | 0.540 | 0.693 | 1.420 | 0.851 | 0.750 | 1.095 | 0.853 | 0.708 | 0.968 | 0.874 | 1.077 | 1.67  | 0.43 | 1.35 | 0.36 |
| META1_2741 | conserved protein of unknown function                    | 0.000 | 0.000 | 0.000 | 0.000 | 0.000 | 0.000 | 0.000 | 0.039 | 0.000 | 0.000 | 0.000 | 0.013 | n.d.  | 0.37 | n.d. | 0.37 |
| META1_2742 | molybdenum-pterin binding protein                        | 0.234 | 0.000 | 0.173 | 0.000 | 0.143 | 0.118 | 0.086 | 0.000 | 0.079 | 0.118 | 0.111 | 0.054 | 0.62  | 0.90 | 0.73 | 0.95 |
| META1_2743 | conserved protein of unknown function                    | 0.000 | 0.091 | 0.049 | 0.000 | 0.000 | 0.071 | 0.107 | 0.116 | 0.099 | 0.054 | 0.030 | 0.108 | 2.67  | 0.44 | 5.33 | 0.13 |
| META1_2755 | putative response regulator; Input and output domains    | 0.000 | 0.000 | 0.000 | 0.000 | 0.000 | 0.000 | 0.000 | 0.039 | 0.000 | 0.000 | 0.000 | 0.013 | n.d.  | 0.37 | n.d. | 0.37 |
| META1_2757 | XoxF. Encodes putative PQQ-linked dehydrogenase of u     | 0.000 | 0.000 | 0.000 | 0.000 | 0.048 | 0.000 | 0.000 | 0.000 | 0.000 | 0.000 | 0.020 | 0.000 | n.d.  | n.d. | 0.00 | 0.37 |
| META1_2759 | putative short chain alcohol dehydrogenase               | 0.000 | 0.000 | 0.000 | 0.000 | 0.143 | 0.189 | 0.064 | 0.135 | 0.000 | 0.000 | 0.141 | 0.067 | n.d.  | 0.12 | 0.71 | 0.93 |
| META1_2760 | putative transcriptional regulatory protein, TetR family | 0.000 | 0.000 | 0.000 | 0.000 | 0.143 | 0.142 | 0.107 | 0.271 | 0.079 | 0.000 | 0.121 | 0.155 | n.d.  | 0.00 | 1.92 | 0.37 |
| META1_2762 | RND efflux transporter, HAE1 family, translocase subun   | 0.000 | 0.000 | 0.000 | 0.000 | 0.143 | 0.071 | 0.000 | 0.000 | 0.000 | 0.000 | 0.091 | 0.000 | n.d.  | n.d. | 0.00 | 0.12 |
| META1_2763 | RND efflux transporter, MFP subunit                      | 0.000 | 0.000 | 0.000 | 0.000 | 0.214 | 0.165 | 0.000 | 0.000 | 0.000 | 0.000 | 0.161 | 0.000 | n.d.  | n.d. | 0.00 | 0.12 |
| META1_2768 | putative transcriptional regulator, XRE family           | 0.000 | 0.000 | 0.000 | 0.000 | 0.119 | 0.047 | 0.107 | 0.000 | 0.000 | 0.000 | 0.071 | 0.034 | n.d.  | 0.37 | 0.71 | 0.50 |
| META1_2770 | Methylamine dehydrogenase large subunit precursor        | 0.117 | 0.521 | 0.223 | 0.000 | 0.570 | 0.307 | 0.343 | 0.619 | 0.278 | 0.318 | 0.373 | 0.417 | 1.77  | 0.38 | 1.68 | 0.36 |
| META1_2772 | Methylamine utilization protein mauD                     | 0.000 | 0.000 | 0.000 | 0.000 | 0.071 | 0.095 | 0.000 | 0.000 | 0.000 | 0.000 | 0.071 | 0.000 | n.d.  | n.d. | 0.00 | 0.12 |
| META1_2773 | Methylamine dehydrogenase small subunit precursor (f     | 0.000 | 0.000 | 0.000 | 0.000 | 0.000 | 0.047 | 0.000 | 0.000 | 0.000 | 0.000 | 0.020 | 0.000 | n.d.  | n.d. | 0.00 | 0.37 |
| META1_2774 | Amicyanin precursor                                      | 0.117 | 0.181 | 0.173 | 0.000 | 0.119 | 0.000 | 0.107 | 0.213 | 0.179 | 0.163 | 0.050 | 0.168 | 1.39  | 0.90 | 5.00 | 0.13 |
| META1_2777 | Methylamine utilization protein mauL                     | 0.000 | 0.000 | 0.049 | 0.000 | 0.000 | 0.000 | 0.000 | 0.000 | 0.000 | 0.018 | 0.000 | 0.000 | 0.00  | 0.37 | n.d. | n.d. |
| META1_2780 | protein of unknown function; putative exported prote     | 0.000 | 0.045 | 0.049 | 0.135 | 0.000 | 0.000 | 0.000 | 0.000 | 0.000 | 0.036 | 0.020 | 0.000 | 0.00  | 0.12 | 0.00 | 0.37 |
| META1_2781 | putative antioxidant enzyme, Tpx-related thiol peroxid   | 0.078 | 0.159 | 0.099 | 0.000 | 0.143 | 0.095 | 0.086 | 0.135 | 0.159 | 0.118 | 0.101 | 0.128 | 1.46  | 0.65 | 1.90 | 0.38 |
| META1_2796 | conserved protein of unknown function                    | 0.000 | 0.091 | 0.074 | 0.000 | 0.000 | 0.095 | 0.150 | 0.000 | 0.079 | 0.064 | 0.040 | 0.074 | 1.57  | 0.97 | 2.75 | 0.53 |
| META1_2802 | protein of unknown function                              | 0.000 | 0.113 | 0.000 | 0.000 | 0.095 | 0.118 | 0.064 | 0.058 | 0.119 | 0.045 | 0.091 | 0.081 | 2.40  | 0.10 | 1.33 | 0.33 |
| META1_2817 | putative septum formation protein, Maf-like protein      | 0.156 | 0.159 | 0.124 | 0.203 | 0.190 | 0.260 | 0.428 | 0.406 | 0.238 | 0.145 | 0.222 | 0.356 | 3.31  | 0.01 | 2.41 | 0.09 |
| META1_2818 | protein of unknown function                              | 0.000 | 0.113 | 0.000 | 0.000 | 0.000 | 0.000 | 0.086 | 0.000 | 0.099 | 0.045 | 0.000 | 0.060 | 1.80  | 0.51 | n.d. | 0.12 |
| META1_2820 | putative TonB-dependent siderophore receptor             | 1.752 | 0.000 | 0.000 | 0.271 | 0.000 | 0.047 | 0.000 | 0.000 | 0.000 | 0.408 | 0.060 | 0.000 | 0.00  | 0.37 | 0.00 | 0.12 |
| META1_2826 | heme export protein, cytochrome C-type biogenesis co     | 0.000 | 0.000 | 0.000 | 0.000 | 0.095 | 0.095 | 0.086 | 0.116 | 0.119 | 0.000 | 0.081 | 0.108 | n.d.  | 0.00 | 2.00 | 0.39 |
| META1_2828 | acconitate hydratase                                     | 4.711 | 5.823 | 7.868 | 4.464 | 3.230 | 2.835 | 2.699 | 2.184 | 2.024 | 6.314 | 3.246 | 2.292 | 4.69  | 0.00 | 1.06 | 0.06 |
| META1_2829 | antibiotic biosynthesis monooxygenase                    | 0.117 | 0.385 | 0.198 | 0.000 | 0.143 | 0.142 | 0.064 | 0.097 | 0.000 | 0.254 | 0.121 | 0.054 | 0.29  | 0.53 | 0.67 | 0.50 |
| META1_2830 | methylacetacetate isomerase (glutathione S-transfer      | 0.428 | 0.385 | 0.346 | 0.406 | 0.333 | 0.331 | 0.450 | 0.425 | 0.357 | 0.381 | 0.343 | 0.410 | 1.45  | 0.55 | 1.79 | 0.22 |
| META1_2831 | respiratory NADH dehydrogenase 2; cupric reductase       | 1.363 | 0.793 | 1.014 | 0.676 | 1.093 | 0.898 | 0.857 | 0.599 | 0.655 | 1.007 | 0.947 | 0.699 | 0.94  | 0.11 | 1.11 | 0.27 |
| META1_2832 | putative Ethyl tert-butyl ether degradation EtdH         | 0.073 | 0.612 | 0.421 | 0.271 | 0.238 | 0.307 | 0.428 | 0.309 | 0.377 | 0.626 | 0.272 | 0.370 | 0.80  | 0.11 | 2.04 | 0.06 |
| META1_2833 | protein of unknown function                              | 0.312 | 0.295 | 0.322 | 0.338 | 0.261 | 0.189 | 0.193 | 0.174 | 0.357 | 0.308 | 0.242 | 0.242 | 1.06  | 0.25 | 1.50 | 0.71 |
| META1_2834 | protein of unknown function                              | 0.000 | 0.068 | 0.124 | 1.353 | 0.879 | 0.567 | 0.664 | 0.580 | 0.595 | 0.073 | 0.816 | 0.612 | 11.38 | 0.72 | 1.12 | 0.23 |
| META1_2835 | putative L-lysine synthetase A (nadA-like)               | 0.000 | 0.136 | 0.173 | 0.203 | 0.451 | 0.520 | 0.493 | 0.425 | 0.536 | 0.118 | 0.443 | 0.484 | 5.54  | 0.58 | 1.64 | 0.40 |
| META1_2836 | putative L-aspartate oxidase (nadB-like)                 | 0.000 | 0.000 | 0.000 | 0.000 | 0.000 | 0.000 | 0.000 | 0.039 | 0.060 | 0.000 | 0.000 | 0.034 | n.d.  | 0.12 | n.d. | 0.12 |
| META1_2837 | nicotinate-mono-nucleotide pyrophosphorylase             | 0.428 | 0.249 | 0.322 | 0.338 | 0.000 | 0.331 | 0.321 | 0.290 | 0.377 | 0.318 | 0.192 | 0.329 | 1.40  | 0.97 | 2.58 | 0.37 |
| META1_2838 | conserved protein of unknown function, ErkF/Ybis/YcFs    | 0.195 | 0.113 | 0.173 | 0.406 | 0.618 | 0.520 | 0.450 | 0.232 | 0.337 | 0.154 | 0.544 | 0.336 | 2.94  | 0.04 | 0.93 | 0.13 |
| META1_2842 | conserved protein of unknown function                    | 0.000 | 0.000 | 0.000 | 0.000 | 0.048 | 0.095 | 0.064 | 0.077 | 0.079 | 0.000 | 0.060 | 0.074 | n.d.  | 0.00 | 1.83 | 0.39 |
| META1_2843 | molybdenum biosynthetic protein A                        | 0.000 | 0.000 | 0.074 | 0.000 | 0.071 | 0.236 | 0.150 | 0.116 | 0.060 | 0.027 | 0.131 | 0.108 | 5.33  | 0.13 | 1.23 | 0.34 |
| META1_2844 | conserved protein of unknown function                    | 0.000 | 0.091 | 0.000 | 0.000 | 0.000 | 0.071 | 0.000 | 0.071 | 0.034 | 0.125 | 0.030 | 0.034 | 1.21  | 0.48 | 1.17 | 0.50 |
| META1_2845 | conserved protein of unknown function                    | 0.000 | 0.000 | 0.000 | 0.000 | 0.071 | 0.071 | 0.000 | 0.116 | 0.079 | 0.000 | 0.060 | 0.067 | n.d.  | 0.12 | 0.67 | 0.97 |
| META1_2846 | putative 2-hydroxy-3-oxopropionate reductase             | 0.545 | 0.589 | 0.817 | 0.338 | 0.095 | 0.425 | 0.750 | 0.754 | 1.151 | 0.662 | 0.272 | 0.887 | 1.81  | 0.18 | 4.89 | 0.06 |
| META1_2847 | delta(2)-isopentenylpyrophosphate tRNA-adenosine tra     | 0.000 | 0.000 | 0.000 | 0.000 | 0.000 | 0.000 | 0.000 | 0.000 | 0.040 | 0.000 | 0.000 | 0.013 | n.d.  | 0.37 | n.d. | 0.37 |
| META1_2848 | putative phosphoserine phosphatase (serP-like)           | 0.312 | 0.136 | 0.223 | 0.000 | 0.238 | 0.260 | 0.386 | 0.251 | 0.258 | 0.209 | 0.212 | 0.296 | 1.91  | 0.31 | 2.10 | 0.40 |
| META1_2849 | putative serine protease precursor                       | 0.896 | 0.974 | 0.965 | 0.676 | 0.499 | 1.016 | 0.728 | 0.735 | 0.814 | 0.953 | 0.746 | 0.759 | 1.08  | 0.01 | 1.53 | 0.72 |
| META1_2850 | HflC protein precursor, modulator for HflB protease spe  | 1.480 | 0.906 | 1.064 | 1.082 | 0.713 | 1.110 | 0.750 | 0.773 | 1.012 | 1.098 | 0.937 | 0.847 | 1.04  | 0.16 | 1.35 | 0.51 |
| META1_2851 | protease subunit hflK                                    | 1.674 | 0.861 | 0.891 | 0.541 | 0.713 | 1.040 | 0.557 | 0.425 | 0.516 | 1.061 | 0.827 | 0.497 | 0.63  | 0.03 | 0.90 | 0.13 |
| META1_2852 | dihydrofolate reductase                                  | 0.000 | 0.068 | 0.074 | 0.000 | 0.048 | 0.000 | 0.107 | 0.097 | 0.079 | 0.054 | 0.020 | 0.094 | 2.33  | 0.41 | 7.00 | 0.15 |
| META1_2853 | thymidylate synthetase                                   | 0.000 | 0.113 | 0.124 | 0.000 | 0.048 | 0.095 | 0.086 | 0.058 | 0.060 | 0.091 | 0.060 | 0.067 | 1.00  | 0.30 | 1.67 | 0.37 |
| META1_2855 | conserved protein of unknown function                    | 0.273 | 0.453 | 0.371 | 0.271 | 0.166 | 0.402 | 0.214 | 0.271 | 0.198 | 0.381 | 0.282 | 0.228 | 0.81  | 0.06 | 1.21 | 0.61 |
| META1_2857 | fumarylase C                                             | 4.088 | 2.900 | 2.821 | 0.744 | 1.164 | 0.969 | 1.671 | 1.546 | 1.369 | 3.148 | 1.018 | 1.526 | 0.65  | 0.00 | 2.25 | 0.03 |
| META1_2858 | conserved protein of unknown function                    | 0.000 | 0.000 | 0.049 | 0.000 | 0.000 | 0.000 | 0.000 | 0.000 | 0.000 | 0.000 | 0.000 | 0.000 | 0.00  | 0.37 | n.d. | n.d. |
| META1_2860 | conserved protein of unknown function                    | 0.000 | 0.000 | 0.000 | 0.000 | 0.000 | 0.000 | 0.043 | 0.000 | 0.000 | 0.000 | 0.000 | 0.013 | n.d.  | 0.37 | n.d. | 0.37 |
| META1_2863 | pyridoxal kinase 2/pyridoxine kinase                     | 0.078 | 0.113 | 0.049 | 0.000 | 0.166 | 0.071 | 0.129 | 0.135 | 0.079 | 0.082 | 0.101 | 0.114 | 1.89  | 0.26 | 1.70 | 0.38 |
| META1_2864 | Phenazine biosynthesis PhzC/PhzF-like protein            | 0.234 | 0.340 | 0.173 | 0.338 | 0.143 | 0.165 | 0.150 | 0.232 | 0.397 | 0.254 | 0.181 | 0.262 | 1.39  | 1.00 | 2.17 | 0.66 |
| META1_2865 | conserved protein of unknown function                    | 0.000 | 0.091 | 0.049 | 0.000 | 0.000 | 0.047 | 0.064 | 0.000 | 0.040 | 0.054 | 0.020 | 0.034 | 0.83  | 0.97 | 2.50 | 0.52 |
| META1_2866 | conserved protein of unknown function                    | 0.350 | 0.136 | 0.247 | 0.203 | 0.071 | 0.118 | 0.279 | 0.116 | 0.159 | 0.227 | 0.111 | 0.181 | 1.08  | 0.50 | 2.45 | 0.41 |
| META1_2867 | 2-isopropylmalate synthase                               | 0.740 | 0.431 | 0.643 | 0.947 | 1.069 | 1.063 | 1.028 | 1.102 | 1.092 | 0.581 | 1.048 | 1.075 | 2.50  | 0.02 | 1.54 | 0.36 |
| META1_2868 | dihydroxyacid dehydratase                                | 0.312 | 0.317 | 0.346 | 0.338 | 2.090 | 1.323 | 1.414 | 1.063 | 1.290 | 0.327 | 1.502 | 1.250 | 5.17  | 0.00 | 1.25 | 0.68 |
| META1_2869 | conserved protein of unknown function                    | 0.078 | 0.295 | 0.272 | 0.203 | 0.238 | 0.307 | 0.193 | 0.290 | 0.179 | 0.236 | 0.262 | 0.222 | 1.27  | 0.75 | 1.27 | 0.53 |
| META1_2870 | L-Ala-D/L-Glu epimerase                                  | 0.000 | 0.045 | 0.074 | 0.000 | 0.119 | 0.071 | 0.064 | 0.039 | 0.000 | 0.045 | 0.081 | 0.034 | 1.00  | 0.98 | 0.63 | 0.93 |
| META1_2872 | inositol-3-phosphate synthase                            | 0.935 | 0.702 | 1.039 | 0.203 | 0.356 | 0.402 | 0.750 | 0.599 | 0.655 | 0.880 | 0.353 | 0.665 | 1.02  | 0.10 | 2.83 | 0.02 |
| META1_2873 | protein of unknown function                              | 0.078 | 0.000 | 0.000 | 0.000 | 0.000 | 0.000 | 0.064 | 0.058 | 0.040 | 0.018 | 0.000 | 0.054 | 4.00  | 0.10 | n.d. | 0.00 |
| META1_2874 | protein of unknown function                              | 0.000 | 0.136 | 0.124 | 0.000 | 0.095 | 0.071 | 0.064 |       |       |       |       |       |       |      |      |      |

|            |                                                          |       |       |       |       |       |       |       |       |       |       |       |       |      |      |      |      |
|------------|----------------------------------------------------------|-------|-------|-------|-------|-------|-------|-------|-------|-------|-------|-------|-------|------|------|------|------|
| META1_2962 | conserved protein of unknown function; putative outer    | 0.000 | 0.000 | 0.000 | 0.000 | 0.048 | 0.095 | 0.000 | 0.000 | 0.000 | 0.000 | 0.060 | 0.000 | n.d. | n.d. | 0.00 | 0.12 |
| META1_2963 | conserved protein of unknown function                    | 0.428 | 0.249 | 0.371 | 0.203 | 0.594 | 0.591 | 0.193 | 0.174 | 0.298 | 0.336 | 0.534 | 0.222 | 0.89 | 0.12 | 0.62 | 0.17 |
| META1_2966 | Cyanate lyase                                            | 0.000 | 0.000 | 0.000 | 0.000 | 0.000 | 0.000 | 0.064 | 0.000 | 0.000 | 0.000 | 0.000 | 0.020 | n.d. | 0.37 | n.d. | 0.37 |
| META1_2969 | putative di-haem cytochrome c peroxidase                 | 0.000 | 0.000 | 0.000 | 0.000 | 0.000 | 0.047 | 0.000 | 0.039 | 0.000 | 0.000 | 0.020 | 0.013 | n.d. | 0.37 | 1.00 | 0.99 |
| META1_2975 | conserved protein of unknown function                    | 0.000 | 0.000 | 0.000 | 0.000 | 0.048 | 0.000 | 0.000 | 0.060 | 0.000 | 0.000 | 0.020 | 0.020 | n.d. | 0.37 | 1.50 | 0.99 |
| META1_2977 | putative spermidine synthase                             | 0.000 | 0.000 | 0.000 | 0.000 | 0.071 | 0.047 | 0.000 | 0.077 | 0.067 | 0.000 | 0.000 | 0.047 | n.d. | 0.12 | 1.40 | 0.98 |
| META1_2980 | protein of unknown function; putative exported protein   | 0.000 | 0.000 | 0.000 | 0.000 | 0.048 | 0.071 | 0.000 | 0.000 | 0.000 | 0.000 | 0.050 | 0.000 | n.d. | n.d. | 0.00 | 0.12 |
| META1_2981 | 3-deoxy-8-phosphotransferase                             | 0.389 | 0.408 | 0.297 | 0.473 | 0.143 | 0.331 | 0.428 | 0.329 | 0.397 | 0.363 | 0.272 | 0.383 | 1.43 | 0.68 | 2.11 | 0.45 |
| META1_2982 | protein of unknown function; putative exported protein   | 0.000 | 0.136 | 0.173 | 0.203 | 0.000 | 0.260 | 0.000 | 0.058 | 0.060 | 0.118 | 0.141 | 0.040 | 0.46 | 0.89 | 0.43 | 0.84 |
| META1_2983 | GTP cyclohydrolase family protein                        | 0.350 | 0.249 | 0.124 | 0.000 | 0.143 | 0.118 | 0.129 | 0.155 | 0.159 | 0.227 | 0.111 | 0.148 | 0.88 | 0.26 | 2.00 | 0.39 |
| META1_2984 | enolase                                                  | 3.193 | 2.878 | 2.598 | 2.097 | 1.971 | 1.914 | 1.821 | 2.146 | 2.024 | 2.849 | 1.966 | 2.003 | 0.95 | 0.01 | 1.53 | 1.00 |
| META1_2985 | Septum formation initiator                               | 0.000 | 0.000 | 0.000 | 0.000 | 0.000 | 0.000 | 0.043 | 0.000 | 0.000 | 0.000 | 0.000 | 0.013 | n.d. | 0.37 | n.d. | 0.37 |
| META1_2986 | pyruvate dehydrogenase E1 alpha subunit                  | 3.271 | 1.359 | 1.930 | 0.271 | 0.475 | 0.449 | 0.728 | 0.599 | 0.695 | 2.014 | 0.433 | 0.672 | 0.45 | 0.01 | 2.33 | 0.04 |
| META1_2987 | pyruvate dehydrogenase E1 beta subunit                   | 5.880 | 3.489 | 3.365 | 0.879 | 1.188 | 0.732 | 1.778 | 1.585 | 1.508 | 4.001 | 0.947 | 1.620 | 0.55 | 0.01 | 2.56 | 0.02 |
| META1_2988 | conserved protein of unknown function                    | 0.000 | 0.249 | 0.148 | 0.000 | 0.000 | 0.000 | 0.107 | 0.097 | 0.099 | 0.154 | 0.000 | 0.101 | 0.88 | 0.29 | n.d. | 0.00 |
| META1_2989 | dihydrolipoamide acetyltransferase                       | 7.632 | 4.600 | 4.973 | 0.812 | 0.855 | 0.425 | 1.478 | 1.372 | 1.548 | 5.443 | 0.665 | 1.465 | 0.36 | 0.00 | 3.30 | 0.03 |
| META1_2990 | dihydrolipoamide dehydrogenase, E3 Component of Py       | 4.711 | 3.625 | 3.909 | 0.338 | 0.380 | 0.378 | 1.135 | 1.314 | 1.270 | 3.983 | 0.373 | 1.243 | 0.42 | 0.00 | 5.00 | 0.00 |
| META1_2992 | conserved protein of unknown function                    | 0.273 | 0.227 | 0.198 | 0.000 | 0.000 | 0.000 | 0.000 | 0.058 | 0.139 | 0.227 | 0.000 | 0.067 | 0.40 | 0.53 | n.d. | 0.12 |
| META1_2995 | conserved protein of unknown function; putative export   | 0.078 | 0.204 | 0.124 | 0.000 | 0.000 | 0.047 | 0.086 | 0.000 | 0.079 | 0.145 | 0.020 | 0.054 | 0.50 | 0.44 | 4.00 | 0.55 |
| META1_3000 | Lipoate synthase                                         | 0.078 | 0.159 | 0.148 | 0.000 | 0.095 | 0.118 | 0.107 | 0.116 | 0.198 | 0.136 | 0.091 | 0.141 | 1.40 | 0.76 | 2.33 | 0.41 |
| META1_3001 | cyclase/dehydrase                                        | 0.195 | 0.181 | 0.223 | 0.000 | 0.166 | 0.142 | 0.171 | 0.116 | 0.198 | 0.200 | 0.131 | 0.161 | 1.09 | 0.25 | 1.85 | 0.38 |
| META1_3004 | putative 3-oxoacyl-(Acyl-carrier-protein) synthase III   | 0.000 | 0.045 | 0.000 | 0.000 | 0.000 | 0.000 | 0.000 | 0.000 | 0.000 | 0.018 | 0.000 | 0.000 | 0.00 | 0.37 | n.d. | n.d. |
| META1_3005 | putative acyl carrier protein                            | 0.000 | 0.068 | 0.000 | 0.000 | 0.000 | 0.000 | 0.000 | 0.000 | 0.000 | 0.027 | 0.000 | 0.000 | 0.00 | 0.37 | n.d. | n.d. |
| META1_3007 | putative short chain alcohol dehydrogenase               | 0.000 | 0.000 | 0.000 | 0.000 | 0.000 | 0.000 | 0.000 | 0.058 | 0.000 | 0.000 | 0.000 | 0.020 | n.d. | 0.37 | n.d. | 0.37 |
| META1_3009 | Putative acetyltransferase                               | 0.000 | 0.091 | 0.000 | 0.135 | 0.000 | 0.000 | 0.064 | 0.155 | 0.079 | 0.036 | 0.020 | 0.101 | 3.75 | 0.12 | 7.50 | 0.10 |
| META1_3010 | Conserved protein, TPR repeat containing                 | 0.000 | 0.000 | 0.000 | 0.000 | 0.071 | 0.000 | 0.086 | 0.097 | 0.099 | 0.000 | 0.030 | 0.094 | n.d. | 0.00 | 4.67 | 0.13 |
| META1_3012 | putative ABC transporter, fused ATPase and permease      | 0.000 | 0.000 | 0.000 | 0.000 | 0.071 | 0.047 | 0.086 | 0.058 | 0.079 | 0.000 | 0.050 | 0.074 | n.d. | 0.00 | 2.20 | 0.41 |
| META1_3014 | oxidoreductase, 2Fe-2S subunit                           | 0.000 | 0.159 | 0.049 | 0.000 | 0.071 | 0.000 | 0.064 | 0.116 | 0.099 | 0.082 | 0.030 | 0.094 | 1.56 | 0.38 | 4.67 | 0.13 |
| META1_3015 | oxidoreductase, FAD-binding subunit; putative molybd     | 0.000 | 0.385 | 0.223 | 0.135 | 0.285 | 0.189 | 0.343 | 0.174 | 0.278 | 0.236 | 0.222 | 0.262 | 1.50 | 0.35 | 1.77 | 0.40 |
| META1_3016 | oxidoreductase, molybdopterin-binding subunit            | 0.000 | 0.612 | 0.421 | 0.271 | 0.190 | 0.331 | 0.471 | 0.232 | 0.179 | 0.399 | 0.262 | 0.289 | 0.98 | 0.28 | 1.65 | 0.90 |
| META1_3017 | GlnK (complemente-damaged protein) family protein        | 0.000 | 0.000 | 0.000 | 0.000 | 0.000 | 0.000 | 0.000 | 0.000 | 0.000 | 0.000 | 0.000 | 0.027 | n.d. | 0.00 | 0.12 | 0.12 |
| META1_3018 | hsp10sf bifunctional enzyme [2-C-methyl-D-erythritol     | 0.467 | 0.408 | 0.247 | 0.406 | 0.451 | 0.473 | 0.450 | 0.677 | 0.734 | 0.363 | 0.454 | 0.625 | 2.33 | 0.10 | 2.07 | 0.12 |
| META1_3019 | tRNA-dihydrouridine synthase B                           | 0.000 | 0.000 | 0.000 | 0.000 | 0.000 | 0.000 | 0.000 | 0.058 | 0.060 | 0.000 | 0.000 | 0.040 | n.d. | 0.12 | n.d. | 0.12 |
| META1_3020 | sensory histidine kinase (soluble) in two-component reg  | 0.000 | 0.113 | 0.099 | 0.000 | 0.166 | 0.165 | 0.129 | 0.155 | 0.060 | 0.082 | 0.141 | 0.114 | 1.89 | 0.38 | 1.21 | 0.31 |
| META1_3021 | two-component sigma-54 specific nitrogen transcrip       | 0.000 | 0.204 | 0.198 | 0.000 | 0.261 | 0.189 | 0.236 | 0.271 | 0.278 | 0.154 | 0.192 | 0.262 | 2.29 | 0.42 | 2.05 | 0.40 |
| META1_3023 | nitrogen regulatory signal transduction histidine kinase | 0.000 | 0.091 | 0.148 | 0.000 | 0.095 | 0.095 | 0.150 | 0.077 | 0.000 | 0.091 | 0.081 | 0.074 | 1.10 | 0.99 | 1.38 | 0.99 |
| META1_3024 | two-component sigma-54 specific nitrogen transcrip       | 0.428 | 0.748 | 0.594 | 0.473 | 0.475 | 0.543 | 0.600 | 0.715 | 0.675 | 0.617 | 0.504 | 0.665 | 1.46 | 0.46 | 1.98 | 0.01 |
| META1_3025 | Protein hfq, RNA-binding host factor                     | 0.312 | 0.498 | 0.445 | 0.000 | 0.309 | 0.425 | 0.450 | 0.213 | 0.357 | 0.435 | 0.312 | 0.336 | 1.04 | 0.42 | 1.61 | 0.36 |
| META1_3026 | putative GTPase (HflX)                                   | 0.117 | 0.612 | 0.470 | 0.271 | 0.594 | 0.402 | 0.600 | 0.541 | 0.536 | 0.445 | 0.464 | 0.558 | 1.69 | 0.35 | 1.80 | 0.22 |
| META1_3031 | conserved protein of unknown function; putative export   | 0.000 | 0.000 | 0.000 | 0.000 | 0.095 | 0.071 | 0.000 | 0.058 | 0.060 | 0.000 | 0.071 | 0.040 | n.d. | 0.12 | 0.86 | 0.96 |
| META1_3032 | conserved protein of unknown function; putative export   | 0.000 | 0.113 | 0.148 | 0.000 | 0.095 | 0.118 | 0.150 | 0.077 | 0.119 | 0.100 | 0.091 | 0.114 | 1.55 | 0.35 | 1.89 | 0.38 |
| META1_3033 | Heavy metal efflux pump CzcA (precursor)                 | 0.000 | 0.000 | 0.000 | 0.000 | 0.000 | 0.000 | 0.086 | 0.077 | 0.079 | 0.000 | 0.000 | 0.081 | n.d. | 0.00 | n.d. | 0.00 |
| META1_3035 | putative transcriptional regulator, MucR family          | 1.168 | 0.558 | 0.718 | 0.107 | 1.157 | 1.087 | 1.157 | 1.469 | 1.377 | 2.256 | 1.189 | 1.377 | 2.25 | 0.17 | 1.61 | 0.94 |
| META1_3037 | protein of unknown function                              | 0.000 | 0.000 | 0.000 | 0.000 | 0.071 | 0.071 | 0.064 | 0.077 | 0.040 | 0.000 | 0.060 | 0.060 | n.d. | 0.00 | 1.50 | 0.35 |
| META1_3039 | cheW-like protein                                        | 0.000 | 0.113 | 0.099 | 0.000 | 0.119 | 0.000 | 0.086 | 0.077 | 0.159 | 0.082 | 0.050 | 0.108 | 1.78 | 0.37 | 3.20 | 0.11 |
| META1_3040 | methyl-accepting chemotaxis sensory transducer           | 0.506 | 0.702 | 0.668 | 0.000 | 0.998 | 0.496 | 0.600 | 0.831 | 0.794 | 0.644 | 0.635 | 0.746 | 1.56 | 0.30 | 1.76 | 0.38 |
| META1_3041 | signal transduction histidine kinase with N-terminal pho | 0.078 | 0.181 | 0.272 | 0.338 | 0.238 | 0.165 | 0.386 | 0.348 | 0.139 | 0.191 | 0.222 | 0.289 | 2.05 | 0.34 | 1.95 | 0.78 |
| META1_3042 | Chemotaxis response regulator protein-glutamate meth     | 0.000 | 0.000 | 0.000 | 0.000 | 0.000 | 0.071 | 0.043 | 0.039 | 0.060 | 0.000 | 0.030 | 0.047 | n.d. | 0.00 | 2.33 | 0.10 |
| META1_3043 | putative Sensor protein, CheY-like domain                | 0.000 | 0.091 | 0.049 | 0.000 | 0.000 | 0.000 | 0.064 | 0.116 | 0.000 | 0.054 | 0.000 | 0.060 | 1.50 | 0.97 | n.d. | 0.12 |
| META1_3044 | putative sensor hybrid histidine kinase with two PAS an  | 0.117 | 0.159 | 0.322 | 0.135 | 0.333 | 0.354 | 0.386 | 0.561 | 0.357 | 0.209 | 0.312 | 0.437 | 2.83 | 0.06 | 2.10 | 0.20 |
| META1_3045 | Putative metalloionin                                    | 0.000 | 0.068 | 0.124 | 0.135 | 0.000 | 0.047 | 0.129 | 0.039 | 0.099 | 0.073 | 0.040 | 0.087 | 1.63 | 0.36 | 3.25 | 0.38 |
| META1_3047 | putative molybdopterin biosynthesis-related protein      | 0.000 | 0.000 | 0.000 | 0.000 | 0.190 | 0.165 | 0.107 | 0.097 | 0.040 | 0.000 | 0.151 | 0.081 | n.d. | 0.00 | 0.80 | 0.27 |
| META1_3048 | putative molybdopterin biosynthesis-related protein      | 0.000 | 0.227 | 0.272 | 0.000 | 0.166 | 0.095 | 0.214 | 0.290 | 0.179 | 0.191 | 0.111 | 0.228 | 1.62 | 0.36 | 3.09 | 0.47 |
| META1_3049 | molybdopterin-guanine dinucleotide biosynthesis prote    | 0.000 | 0.113 | 0.049 | 0.000 | 0.071 | 0.095 | 0.064 | 0.135 | 0.060 | 0.064 | 0.071 | 0.087 | 1.86 | 0.39 | 1.86 | 0.37 |
| META1_3050 | Putative molybdopterin biosynthesis-related protein      | 0.078 | 0.136 | 0.095 | 0.000 | 0.166 | 0.189 | 0.107 | 0.174 | 0.099 | 0.109 | 0.151 | 0.128 | 1.58 | 0.47 | 1.27 | 0.32 |
| META1_3051 | putative Regulator protein, LysR                         | 0.000 | 0.000 | 0.074 | 0.000 | 0.064 | 0.000 | 0.064 | 0.039 | 0.000 | 0.027 | 0.020 | 0.048 | 1.67 | 0.49 | 2.50 | 0.52 |
| META1_3052 | putative Sulfate/tungstate uptake transporter, membra    | 0.000 | 0.000 | 0.000 | 0.000 | 0.071 | 0.000 | 0.000 | 0.000 | 0.000 | 0.000 | 0.030 | 0.000 | n.d. | n.d. | 0.00 | 0.37 |
| META1_3053 | ABC transporter related ATP-binding protein, putative r  | 0.000 | 0.000 | 0.000 | 0.000 | 0.000 | 0.071 | 0.043 | 0.077 | 0.079 | 0.000 | 0.030 | 0.067 | n.d. | 0.00 | 3.33 | 0.11 |
| META1_3054 | Molybdate or tungstate transport precursor               | 0.740 | 0.748 | 0.742 | 0.812 | 0.523 | 0.732 | 0.514 | 0.541 | 0.437 | 0.744 | 0.655 | 0.497 | 0.90 | 0.00 | 1.14 | 0.10 |
| META1_3056 | conserved protein of unknown function; putative export   | 0.195 | 0.113 | 0.198 | 0.000 | 0.000 | 0.047 | 0.043 | 0.058 | 0.040 | 0.163 | 0.020 | 0.047 | 0.39 | 0.00 | 3.50 | 0.12 |
| META1_3057 | putative periplasmic glucan biosynthesis protein         | 0.000 | 0.000 | 0.099 | 0.000 | 0.000 | 0.047 | 0.000 | 0.000 | 0.000 | 0.036 | 0.020 | 0.000 | 0.00 | 0.37 | 0.00 | 0.37 |
| META1_3059 | protein of unknown function; putative exported protein   | 0.000 | 0.000 | 0.000 | 0.000 | 0.000 | 0.000 | 0.000 | 0.000 | 0.040 | 0.000 | 0.000 | 0.013 | n.d. | 0.37 | n.d. | 0.37 |
| META1_3060 | putative cystathionine gamma-synthase, PLP-dependen      | 0.857 | 0.544 | 0.643 | 0.000 | 0.380 | 0.449 | 0.257 | 0.290 | 0.119 | 0.653 | 0.353 | 0.222 | 0.46 | 0.02 | 0.94 | 0.28 |
| META1_3062 | putative response regulator (CheY-like protein)          | 0.000 | 0.204 | 0.148 | 0.000 | 0.095 | 0.071 | 0.000 | 0.000 | 0.060 | 0.136 | 0.071 | 0.020 | 0.20 | 0.59 | 0.43 | 0.54 |
| META1_3063 | Hypoxanthine phosphoribosyl transferase                  | 0.623 | 0.793 | 0.841 | 0.609 | 0.546 | 0.449 | 0.643 | 0.657 | 0.714 | 0.771 | 0.514 | 0.672 | 1.18 | 0.33 | 1.96 | 0.07 |
| META1_3064 | Predicted transcriptional regulator containing the CopG  | 0.000 | 0.068 | 0.000 | 0.000 | 0.000 | 0.047 | 0.000 | 0.000 | 0.000 | 0.027 | 0.020 | 0.000 | 0.00 | 0.37 | 0.00 | 0.37 |
| META1_3067 | transporter subunit: ATP-binding component of ABC sub    | 0.156 | 0.181 | 0.074 | 0.000 | 0.    |       |       |       |       |       |       |       |      |      |      |      |

|            |                                                           |       |       |       |       |       |       |       |       |       |       |       |       |       |      |      |      |
|------------|-----------------------------------------------------------|-------|-------|-------|-------|-------|-------|-------|-------|-------|-------|-------|-------|-------|------|------|------|
| META1_3171 | cytidine deaminase (cytidine aminohydrolase)              | 0.000 | 0.000 | 0.000 | 0.000 | 0.071 | 0.071 | 0.000 | 0.155 | 0.079 | 0.000 | 0.060 | 0.081 | n.d.  | 0.12 | 2.00 | 0.95 |
| META1_3172 | conserved protein of unknown function                     | 0.000 | 0.159 | 0.124 | 0.000 | 0.143 | 0.071 | 0.214 | 0.077 | 0.179 | 0.109 | 0.091 | 0.155 | 1.92  | 0.38 | 2.56 | 0.43 |
| META1_3173 | Tetraacyldisaccharide 4'-kinase                           | 0.000 | 0.068 | 0.000 | 0.000 | 0.000 | 0.047 | 0.086 | 0.000 | 0.060 | 0.027 | 0.020 | 0.047 | 2.33  | 0.52 | 3.50 | 0.54 |
| META1_3174 | 3-deoxy-D-manno-oculosonic acid transferase               | 0.000 | 0.000 | 0.000 | 0.000 | 0.048 | 0.095 | 0.043 | 0.135 | 0.060 | 0.000 | 0.060 | 0.081 | n.d.  | 0.00 | 2.00 | 0.38 |
| META1_3175 | conserved protein of unknown function, DUF374             | 0.312 | 0.227 | 0.148 | 0.000 | 0.095 | 0.165 | 0.150 | 0.290 | 0.099 | 0.218 | 0.111 | 0.211 | 1.13  | 0.40 | 2.45 | 0.42 |
| META1_3176 | putative metallophosphatase/metallophosphoesterase        | 0.000 | 0.043 | 0.049 | 0.000 | 0.071 | 0.000 | 0.107 | 0.000 | 0.079 | 0.036 | 0.030 | 0.060 | 0.036 | 0.93 | 3.00 | 0.54 |
| META1_3178 | putative transcriptional regulator, cold shock protein    | 5.023 | 3.082 | 3.167 | 6.019 | 1.449 | 3.237 | 3.342 | 3.731 | 4.307 | 3.565 | 2.893 | 3.804 | 1.44  | 0.87 | 1.97 | 0.64 |
| META1_3180 | leucine aminopeptidase                                    | 0.117 | 0.363 | 0.223 | 0.271 | 0.285 | 0.189 | 0.321 | 0.290 | 0.278 | 0.254 | 0.242 | 0.296 | 1.57  | 0.37 | 1.83 | 0.23 |
| META1_3181 | conserved protein of unknown function, tetratricopept     | 0.000 | 0.000 | 0.000 | 0.000 | 0.000 | 0.000 | 0.043 | 0.000 | 0.000 | 0.000 | 0.000 | 0.013 | n.d.  | 0.37 | n.d. | 0.37 |
| META1_3182 | 50S ribosomal protein L28                                 | 0.973 | 0.702 | 0.718 | 0.473 | 0.784 | 1.016 | 0.814 | 0.793 | 0.992 | 0.771 | 0.837 | 0.867 | 1.52  | 0.52 | 1.55 | 0.49 |
| META1_3184 | lysyl tRNA synthetase                                     | 0.389 | 0.657 | 0.792 | 0.271 | 1.093 | 0.520 | 0.578 | 0.503 | 0.675 | 0.644 | 0.726 | 0.585 | 1.23  | 0.96 | 1.21 | 0.85 |
| META1_3187 | peptide chain release factor RF-2                         | 0.000 | 0.272 | 0.272 | 0.135 | 0.214 | 0.260 | 0.236 | 0.251 | 0.258 | 0.209 | 0.222 | 0.249 | 1.61  | 0.36 | 1.68 | 0.29 |
| META1_3189 | putative thiol peroxidase, putative peroxiredoxin         | 0.117 | 0.204 | 0.124 | 0.203 | 0.261 | 0.189 | 0.193 | 0.155 | 0.198 | 0.154 | 0.222 | 0.181 | 1.59  | 0.30 | 1.23 | 0.24 |
| META1_3190 | conserved protein of unknown function; putative mem       | 0.000 | 0.000 | 0.000 | 0.000 | 0.119 | 0.047 | 0.064 | 0.077 | 0.099 | 0.000 | 0.071 | 0.081 | n.d.  | 0.00 | 1.71 | 0.38 |
| META1_3192 | tyrosine tRNA synthetase                                  | 0.545 | 0.340 | 0.371 | 0.406 | 0.665 | 0.591 | 0.364 | 0.425 | 0.377 | 0.399 | 0.595 | 0.390 | 1.32  | 0.74 | 0.98 | 0.10 |
| META1_3193 | putative homologue ankK                                   | 0.000 | 0.091 | 0.074 | 0.000 | 0.000 | 0.095 | 0.064 | 0.058 | 0.099 | 0.064 | 0.040 | 0.074 | 1.57  | 0.36 | 2.75 | 0.11 |
| META1_3197 | chorismate synthase                                       | 0.078 | 0.272 | 0.297 | 0.000 | 0.523 | 0.402 | 0.364 | 0.387 | 0.377 | 0.236 | 0.393 | 0.376 | 2.15  | 0.18 | 1.44 | 0.34 |
| META1_3198 | 3,4-dihydroxy-2-butanone-4-phosphate synthase/GTP cy      | 0.662 | 0.544 | 0.495 | 1.150 | 0.808 | 1.181 | 0.621 | 0.619 | 0.655 | 0.553 | 1.018 | 0.632 | 1.54  | 0.26 | 0.93 | 0.02 |
| META1_3199 | Histone deacetylase family protein                        | 0.156 | 0.249 | 0.223 | 0.338 | 0.309 | 0.118 | 0.257 | 0.251 | 0.298 | 0.218 | 0.232 | 0.269 | 1.67  | 0.15 | 1.74 | 0.69 |
| META1_3203 | propionyl-CoA carboxylase alpha subunit                   | 3.037 | 2.130 | 3.019 | 3.314 | 4.941 | 4.796 | 2.871 | 2.455 | 2.719 | 2.667 | 4.637 | 2.675 | 1.35  | 0.96 | 0.87 | 0.03 |
| META1_3204 | conserved protein of unknown function                     | 0.000 | 0.000 | 0.000 | 0.000 | 0.071 | 0.047 | 0.000 | 0.000 | 0.000 | 0.000 | 0.050 | 0.000 | n.d.  | n.d. | 0.00 | 0.12 |
| META1_3206 | Acylphosphatase (Acylphosphate phosphohydrolase)          | 0.000 | 0.091 | 0.074 | 0.000 | 0.000 | 0.000 | 0.000 | 0.000 | 0.000 | 0.064 | 0.000 | 0.000 | 0.00  | 0.12 | n.d. | n.d. |
| META1_3207 | conserved protein of unknown function, DUF599; puta       | 0.000 | 0.000 | 0.000 | 0.000 | 0.048 | 0.000 | 0.000 | 0.000 | 0.000 | 0.000 | 0.020 | 0.000 | n.d.  | n.d. | 0.00 | 0.37 |
| META1_3208 | conserved protein of unknown function                     | 0.000 | 0.045 | 0.000 | 0.000 | 0.000 | 0.000 | 0.064 | 0.000 | 0.040 | 0.018 | 0.000 | 0.034 | 2.50  | 0.53 | n.d. | 0.12 |
| META1_3209 | conserved protein of unknown function, DUF218; puta       | 0.000 | 0.181 | 0.000 | 0.000 | 0.000 | 0.118 | 0.064 | 0.039 | 0.040 | 0.073 | 0.050 | 0.047 | 0.88  | 0.07 | 1.40 | 0.08 |
| META1_3210 | putative glutathione S-transferase                        | 0.312 | 0.295 | 0.272 | 0.406 | 0.119 | 0.118 | 0.279 | 0.251 | 0.238 | 0.290 | 0.161 | 0.255 | 1.19  | 0.09 | 2.38 | 0.43 |
| META1_3212 | putative lysyl-tRNA synthetase (poxA-like)                | 0.078 | 0.091 | 0.000 | 0.000 | 0.000 | 0.047 | 0.150 | 0.058 | 0.099 | 0.054 | 0.020 | 0.101 | 2.50  | 0.39 | 7.50 | 0.15 |
| META1_3213 | elongation factor P (EF-P)                                | 0.350 | 0.272 | 0.247 | 0.676 | 0.380 | 0.591 | 0.321 | 0.367 | 0.198 | 0.281 | 0.514 | 0.296 | 1.42  | 0.99 | 0.86 | 0.07 |
| META1_3215 | putative tandem cold-shock DNA-binding domain prote       | 0.195 | 0.227 | 0.124 | 0.000 | 0.190 | 0.213 | 0.214 | 0.213 | 0.198 | 0.181 | 0.171 | 0.208 | 1.55  | 0.41 | 1.82 | 0.38 |
| META1_3216 | conserved protein of unknown function; putative exp       | 0.156 | 0.091 | 0.099 | 0.203 | 0.190 | 0.118 | 0.129 | 0.135 | 0.139 | 0.109 | 0.161 | 0.134 | 1.67  | 0.34 | 1.25 | 0.29 |
| META1_3218 | putative alpha/beta hydrolase, putative magnesium ch      | 0.000 | 0.000 | 0.000 | 0.000 | 0.000 | 0.000 | 0.000 | 0.000 | 0.000 | 0.000 | 0.000 | 0.020 | n.d.  | n.d. | 0.37 | 0.00 |
| META1_3219 | phytylene dehydrogenase (phytylene desaturase)            | 0.117 | 0.000 | 0.000 | 0.000 | 0.000 | 0.000 | 0.000 | 0.000 | 0.000 | 0.027 | 0.000 | 0.000 | 0.00  | 0.37 | n.d. | n.d. |
| META1_3221 | urease accessory protein UreG                             | 0.000 | 0.000 | 0.049 | 0.000 | 0.166 | 0.118 | 0.000 | 0.077 | 0.099 | 0.018 | 0.121 | 0.060 | 4.50  | 0.55 | 0.75 | 0.95 |
| META1_3224 | urease alpha subunit                                      | 0.000 | 0.091 | 0.173 | 0.203 | 0.166 | 0.000 | 0.193 | 0.309 | 0.179 | 0.000 | 0.101 | 0.228 | 3.09  | 0.46 | 3.40 | 0.40 |
| META1_3227 | urease gamma (N-terminal) and beta (C-terminal) subu      | 0.000 | 0.091 | 0.074 | 0.000 | 0.143 | 0.095 | 0.214 | 0.193 | 0.139 | 0.064 | 0.101 | 0.181 | 3.86  | 0.49 | 2.70 | 0.44 |
| META1_3229 | flavin:NADH oxidoreductase, putative magnesium pyrim      | 0.000 | 0.000 | 0.000 | 0.000 | 0.048 | 0.047 | 0.086 | 0.039 | 0.000 | 0.000 | 0.040 | 0.040 | n.d.  | 0.12 | 1.50 | 0.98 |
| META1_3230 | protein of unknown function; putative exported protein    | 0.000 | 0.000 | 0.000 | 0.000 | 0.000 | 0.000 | 0.000 | 0.000 | 0.040 | 0.000 | 0.000 | 0.013 | n.d.  | 0.37 | n.d. | 0.37 |
| META1_3233 | protein of unknown function                               | 0.078 | 0.181 | 0.173 | 0.135 | 0.119 | 0.189 | 0.064 | 0.116 | 0.060 | 0.154 | 0.151 | 0.081 | 0.71  | 0.18 | 0.80 | 0.06 |
| META1_3234 | UDP-glucuronate 5'-epimerase (UDP-glucuronic acid ep      | 0.000 | 0.204 | 0.173 | 0.135 | 0.214 | 0.189 | 0.257 | 0.213 | 0.238 | 0.145 | 0.192 | 0.235 | 2.19  | 0.41 | 1.84 | 0.12 |
| META1_3240 | protein of unknown function                               | 0.000 | 0.045 | 0.074 | 0.135 | 0.071 | 0.095 | 0.171 | 0.039 | 0.119 | 0.045 | 0.091 | 0.108 | 3.20  | 0.44 | 1.78 | 0.93 |
| META1_3241 | threonine deaminase                                       | 0.273 | 0.249 | 0.396 | 0.000 | 0.214 | 0.378 | 0.364 | 0.483 | 0.417 | 0.308 | 0.252 | 0.423 | 1.85  | 0.11 | 2.52 | 0.44 |
| META1_3244 | conserved protein of unknown function, SlyX family        | 0.000 | 0.000 | 0.049 | 0.000 | 0.000 | 0.000 | 0.000 | 0.000 | 0.000 | 0.018 | 0.000 | 0.000 | 0.00  | 0.37 | n.d. | n.d. |
| META1_3246 | DnaK co-chaperone protein                                 | 0.328 | 0.340 | 0.148 | 0.000 | 0.310 | 0.148 | 0.428 | 0.408 | 0.437 | 0.390 | 0.272 | 0.444 | 2.00  | 0.22 | 2.44 | 0.07 |
| META1_3257 | Flagellar L-ring protein precursor (Basal body L-ring pro | 0.000 | 0.000 | 0.000 | 0.000 | 0.000 | 0.095 | 0.000 | 0.000 | 0.000 | 0.000 | 0.040 | 0.000 | n.d.  | n.d. | 0.00 | 0.37 |
| META1_3261 | Flagellar filL protein                                    | 0.000 | 0.000 | 0.000 | 0.000 | 0.000 | 0.000 | 0.086 | 0.039 | 0.099 | 0.000 | 0.000 | 0.074 | n.d.  | 0.00 | n.d. | 0.00 |
| META1_3265 | putative Glutathione peroxidase                           | 0.000 | 0.091 | 0.049 | 0.000 | 0.095 | 0.000 | 0.086 | 0.116 | 0.060 | 0.054 | 0.040 | 0.087 | 2.17  | 0.41 | 3.25 | 0.11 |
| META1_3266 | protein of unknown function                               | 0.312 | 0.340 | 0.396 | 0.609 | 0.356 | 0.260 | 0.343 | 0.483 | 0.318 | 0.354 | 0.353 | 0.383 | 1.46  | 0.63 | 1.63 | 0.94 |
| META1_3267 | putative membrane bound lytic murein transglycosylas      | 0.000 | 0.113 | 0.049 | 0.000 | 0.119 | 0.189 | 0.000 | 0.000 | 0.000 | 0.064 | 0.131 | 0.000 | 0.00  | 0.12 | 0.00 | 0.12 |
| META1_3268 | putative NAD(P)H quinone oxidoreductase                   | 0.000 | 0.000 | 0.000 | 0.000 | 0.048 | 0.000 | 0.000 | 0.000 | 0.000 | 0.000 | 0.020 | 0.000 | n.d.  | n.d. | 0.00 | 0.37 |
| META1_3270 | conserved protein of unknown function; putative doma      | 0.000 | 0.045 | 0.000 | 0.000 | 0.000 | 0.000 | 0.000 | 0.000 | 0.060 | 0.018 | 0.000 | 0.020 | 1.50  | 0.99 | n.d. | 0.37 |
| META1_3273 | two-component DctB-like sigma-54 specific transcriptio    | 0.000 | 0.000 | 0.000 | 0.000 | 0.071 | 0.000 | 0.064 | 0.058 | 0.079 | 0.000 | 0.030 | 0.067 | n.d.  | 0.00 | 3.33 | 0.11 |
| META1_3277 | Aspartyl/glutamyl-tRNA(Asn/Gln) amidotransferase sub      | 0.623 | 1.201 | 1.608 | 0.812 | 1.093 | 0.638 | 0.943 | 0.793 | 0.814 | 1.216 | 0.857 | 0.847 | 0.94  | 0.47 | 1.48 | 0.89 |
| META1_3283 | S-adenosylmethionine:tRNA ribosyltransferase-isomera      | 0.000 | 0.000 | 0.000 | 0.000 | 0.095 | 0.118 | 0.043 | 0.077 | 0.060 | 0.000 | 0.091 | 0.060 | n.d.  | 0.00 | 1.00 | 0.30 |
| META1_3284 | conserved protein of unknown function                     | 0.000 | 0.000 | 0.000 | 0.000 | 0.000 | 0.047 | 0.043 | 0.058 | 0.099 | 0.000 | 0.020 | 0.067 | n.d.  | 0.00 | 5.00 | 0.13 |
| META1_3285 | Queuine tRNA-ribosyltransferase (tRNA-guanine transg      | 0.000 | 0.000 | 0.074 | 0.000 | 0.071 | 0.118 | 0.064 | 0.116 | 0.040 | 0.027 | 0.081 | 0.074 | 3.67  | 0.11 | 1.38 | 0.33 |
| META1_3288 | conserved protein of unknown function                     | 0.000 | 0.000 | 0.000 | 0.000 | 0.095 | 0.047 | 0.043 | 0.058 | 0.000 | 0.000 | 0.060 | 0.034 | n.d.  | 0.12 | 0.83 | 0.97 |
| META1_3289 | conserved protein of unknown function                     | 0.545 | 1.156 | 0.668 | 0.203 | 0.285 | 0.354 | 0.514 | 0.425 | 0.417 | 0.835 | 0.302 | 0.450 | 0.73  | 0.09 | 2.23 | 0.05 |
| META1_3290 | conserved protein of unknown function                     | 0.000 | 0.000 | 0.000 | 0.000 | 0.000 | 0.000 | 0.000 | 0.039 | 0.040 | 0.000 | 0.000 | 0.027 | n.d.  | 0.12 | n.d. | 0.12 |
| META1_3298 | protein of unknown function; putative exported protein    | 0.000 | 0.091 | 0.000 | 0.000 | 0.000 | 0.071 | 0.000 | 0.058 | 0.000 | 0.036 | 0.030 | 0.020 | 0.75  | 0.98 | 1.00 | 0.99 |
| META1_3299 | H+ translocating pyrophosphatase synthase                 | 0.584 | 0.657 | 0.594 | 0.000 | 0.000 | 0.000 | 0.450 | 0.387 | 0.456 | 0.617 | 0.000 | 0.430 | 0.94  | 0.01 | n.d. | 0.00 |
| META1_3300 | conserved protein of unknown function                     | 0.000 | 0.000 | 0.049 | 0.000 | 0.166 | 0.047 | 0.000 | 0.000 | 0.040 | 0.018 | 0.091 | 0.013 | 1.00  | 0.99 | 0.22 | 0.57 |
| META1_3301 | protein of unknown function; putative exported protein    | 0.000 | 0.045 | 0.000 | 0.000 | 0.000 | 0.071 | 0.000 | 0.000 | 0.000 | 0.018 | 0.030 | 0.000 | 0.00  | 0.37 | 0.00 | 0.37 |
| META1_3302 | putative PUP-dependent aminotransferase (yifZ)            | 0.818 | 0.725 | 0.742 | 0.473 | 0.950 | 0.780 | 0.600 | 0.870 | 0.496 | 0.753 | 0.806 | 0.659 | 1.18  | 0.35 | 1.23 | 0.72 |
| META1_3303 | protein of unknown function; putative exported protein    | 0.000 | 0.000 | 0.000 | 0.000 | 0.095 | 0.118 | 0.129 | 0.000 | 0.119 | 0.000 | 0.091 | 0.081 | n.d.  | 0.12 | 1.33 | 0.98 |
| META1_3304 | Poly(3-hydroxyalkanoate) polymerase (PHA polymerase)      | 0.779 | 2.085 | 1.831 | 0.000 | 0.380 | 0.189 | 1.007 | 0.986 | 0.834 | 1.687 | 0.242 | 0.941 | 0.75  | 0.25 | 5.83 | 0.62 |
| META1_3307 | glycine tRNA synthetase, beta subunit                     | 1.012 | 1.722 | 1.633 | 1.758 | 1.591 | 1.630 | 1.393 | 1.411 | 1.211 | 1.524 | 1.633 | 1.337 | 1.18  | 0.75 | 1.23 | 0.02 |
| META1_3310 | protein of unknown function; put                          |       |       |       |       |       |       |       |       |       |       |       |       |       |      |      |      |

|            |                                                         |       |       |       |       |       |       |       |       |       |       |       |       |      |      |      |      |
|------------|---------------------------------------------------------|-------|-------|-------|-------|-------|-------|-------|-------|-------|-------|-------|-------|------|------|------|------|
| META1_3397 | putative ATP-binding protein with two ATPase domains    | 0.000 | 0.091 | 0.272 | 0.000 | 0.190 | 0.000 | 0.171 | 0.213 | 0.218 | 0.136 | 0.081 | 0.202 | 2.00 | 0.41 | 3.75 | 0.12 |
| META1_3398 | putative porin precursor ; putative exported protein    | 2.297 | 1.292 | 1.782 | 3.382 | 1.116 | 2.504 | 1.628 | 0.908 | 1.429 | 1.706 | 2.046 | 1.311 | 1.04 | 0.28 | 0.96 | 0.25 |
| META1_3400 | Putative adenylate cyclase protein                      | 0.000 | 0.000 | 0.000 | 0.000 | 0.048 | 0.000 | 0.000 | 0.039 | 0.000 | 0.000 | 0.020 | 0.013 | n.d. | 0.37 | 1.00 | 0.99 |
| META1_3403 | dihydrodipicolinate synthase                            | 0.467 | 0.340 | 0.247 | 0.609 | 0.760 | 0.732 | 0.578 | 0.483 | 0.615 | 0.336 | 0.726 | 0.558 | 2.24 | 0.07 | 1.15 | 0.09 |
| META1_3404 | trans-translation protein, binds tRNA and tRNA          | 0.000 | 0.000 | 0.000 | 0.135 | 0.095 | 0.000 | 0.129 | 0.077 | 0.218 | 0.000 | 0.060 | 0.141 | n.d. | 0.00 | 3.50 | 0.40 |
| META1_3405 | Conserved protein of unknown function (DUF88)           | 0.000 | 0.408 | 0.445 | 0.744 | 0.449 | 0.374 | 0.364 | 0.329 | 0.278 | 0.327 | 0.443 | 0.323 | 1.33 | 0.33 | 1.17 | 0.36 |
| META1_3406 | rotate phosphate phosphotransferase (OPRT) (OPRTase)    | 0.545 | 0.408 | 0.297 | 0.541 | 0.380 | 0.473 | 0.343 | 0.483 | 0.258 | 0.399 | 0.443 | 0.363 | 1.23 | 0.60 | 1.23 | 0.26 |
| META1_3408 | GTP pyrophosphokinase                                   | 0.078 | 0.385 | 0.322 | 0.203 | 0.261 | 0.307 | 0.321 | 0.271 | 0.238 | 0.290 | 0.272 | 0.276 | 1.28 | 0.65 | 1.52 | 0.62 |
| META1_3409 | DNA-directed RNA polymerase omega chain (RNAP om        | 0.312 | 0.272 | 0.148 | 0.541 | 0.641 | 0.473 | 0.257 | 0.367 | 0.298 | 0.236 | 0.554 | 0.309 | 1.77 | 0.34 | 0.84 | 0.01 |
| META1_3410 | NiRu-like                                               | 0.273 | 0.317 | 0.346 | 0.473 | 0.238 | 0.236 | 0.193 | 0.271 | 0.238 | 0.318 | 0.272 | 0.235 | 1.00 | 0.07 | 1.30 | 0.37 |
| META1_3411 | Peptidase M22, glycoprotein                             | 0.117 | 0.385 | 0.371 | 0.135 | 0.143 | 0.236 | 0.171 | 0.193 | 0.198 | 0.318 | 0.181 | 0.188 | 0.80 | 0.47 | 1.56 | 0.54 |
| META1_3412 | Ribosomal protein-alanine N-acetyltransferase           | 0.312 | 0.159 | 0.124 | 0.000 | 0.119 | 0.118 | 0.257 | 0.406 | 0.595 | 0.181 | 0.101 | 0.423 | 3.15 | 0.10 | 6.30 | 0.58 |
| META1_3413 | Putative 1-acylglycerol-3-phosphate O-acyltransferase   | 0.000 | 0.000 | 0.000 | 0.000 | 0.000 | 0.000 | 0.086 | 0.058 | 0.079 | 0.000 | 0.000 | 0.074 | n.d. | 0.00 | n.d. | 0.00 |
| META1_3415 | tRNA modification enzyme MiaB, putative isopentenyl-    | 0.000 | 0.000 | 0.000 | 0.000 | 0.119 | 0.142 | 0.107 | 0.097 | 0.139 | 0.000 | 0.111 | 0.114 | n.d. | 0.00 | 1.55 | 0.35 |
| META1_3416 | putative enzyme with nucleoside triphosphate hydrolas   | 0.350 | 0.249 | 0.198 | 0.271 | 0.309 | 0.354 | 0.300 | 0.251 | 0.179 | 0.254 | 0.323 | 0.242 | 1.29 | 0.73 | 1.13 | 0.20 |
| META1_3417 | putative metalloprotease                                | 0.000 | 0.045 | 0.049 | 0.000 | 0.166 | 0.000 | 0.000 | 0.097 | 0.060 | 0.036 | 0.071 | 0.054 | 2.00 | 0.95 | 1.14 | 0.47 |
| META1_3418 | Putative HlyC/CorC family of transporters with CBS dom  | 0.000 | 0.068 | 0.049 | 0.000 | 0.143 | 0.000 | 0.193 | 0.155 | 0.218 | 0.045 | 0.060 | 0.188 | 5.60 | 0.56 | 4.67 | 0.13 |
| META1_3419 | apolipoprotein N-acyltransferase, copper homeostatis    | 0.078 | 0.159 | 0.223 | 0.000 | 0.000 | 0.000 | 0.086 | 0.116 | 0.099 | 0.163 | 0.000 | 0.101 | 0.83 | 0.35 | n.d. | 0.00 |
| META1_3420 | conserved protein of unknown function; putative export  | 0.273 | 0.000 | 0.000 | 0.000 | 0.000 | 0.000 | 0.000 | 0.000 | 0.000 | 0.064 | 0.020 | 0.000 | 0.00 | 0.37 | 0.00 | 0.37 |
| META1_3421 | catalase (hydroperoxidase II)                           | 1.791 | 3.082 | 3.637 | 3.720 | 2.494 | 1.725 | 2.271 | 2.204 | 2.481 | 2.985 | 2.349 | 2.319 | 1.05 | 0.50 | 1.48 | 0.73 |
| META1_3422 | oxidative stress transcriptional regulator, LysK family | 0.000 | 0.000 | 0.000 | 0.000 | 0.071 | 0.000 | 0.043 | 0.000 | 0.000 | 0.000 | 0.030 | 0.013 | n.d. | 0.37 | 0.67 | 0.97 |
| META1_3428 | glutamate racemase                                      | 0.000 | 0.000 | 0.000 | 0.000 | 0.000 | 0.000 | 0.043 | 0.058 | 0.000 | 0.000 | 0.000 | 0.034 | n.d. | 0.12 | n.d. | 0.12 |
| META1_3429 | conserved protein of unknown function                   | 0.234 | 0.136 | 0.074 | 0.000 | 0.071 | 0.095 | 0.043 | 0.077 | 0.060 | 0.136 | 0.071 | 0.060 | 0.60 | 0.09 | 1.29 | 0.33 |
| META1_3430 | conserved protein of unknown function                   | 0.000 | 0.113 | 0.074 | 0.000 | 0.119 | 0.118 | 0.086 | 0.097 | 0.218 | 0.073 | 0.101 | 0.134 | 2.50 | 0.42 | 2.00 | 0.38 |
| META1_3432 | conserved protein of unknown function                   | 0.117 | 0.136 | 0.198 | 0.000 | 0.095 | 0.095 | 0.150 | 0.135 | 0.079 | 0.154 | 0.081 | 0.121 | 1.06 | 0.43 | 2.25 | 0.41 |
| META1_3434 | Siroheme synthase                                       | 0.000 | 0.113 | 0.124 | 0.000 | 0.333 | 0.284 | 0.193 | 0.193 | 0.238 | 0.091 | 0.262 | 0.208 | 3.10 | 0.46 | 1.19 | 0.32 |
| META1_3435 | Electron transport protein SenC-related                 | 0.156 | 0.159 | 0.148 | 0.135 | 0.143 | 0.189 | 0.150 | 0.174 | 0.179 | 0.154 | 0.161 | 0.168 | 1.47 | 0.24 | 1.56 | 0.52 |
| META1_3437 | extracellular solute-binding protein family 3           | 0.000 | 0.045 | 0.000 | 0.000 | 0.000 | 0.071 | 0.000 | 0.058 | 0.000 | 0.018 | 0.030 | 0.020 | 1.50 | 0.99 | 1.00 | 0.99 |
| META1_3440 | Cobaltochelatease (cobT protein)                        | 0.467 | 0.589 | 0.841 | 0.676 | 0.665 | 0.827 | 0.621 | 0.503 | 0.397 | 0.653 | 0.736 | 0.504 | 1.04 | 0.39 | 1.03 | 0.07 |
| META1_3441 | Cobaltochelatease (cobS protein)                        | 1.364 | 1.042 | 0.792 | 1.217 | 1.021 | 1.370 | 0.664 | 0.599 | 0.353 | 1.025 | 1.199 | 0.706 | 0.93 | 0.10 | 0.88 | 0.02 |
| META1_3443 | hook-like protein                                       | 0.078 | 0.113 | 0.000 | 0.000 | 0.190 | 0.142 | 0.129 | 0.039 | 0.079 | 0.064 | 0.141 | 0.081 | 1.71 | 0.34 | 0.86 | 0.27 |
| META1_3445 | conserved protein of unknown function; putative mem     | 0.000 | 0.000 | 0.000 | 0.000 | 0.000 | 0.047 | 0.000 | 0.000 | 0.000 | 0.000 | 0.020 | 0.000 | n.d. | n.d. | 0.00 | 0.37 |
| META1_3446 | conserved protein of unknown function                   | 0.000 | 0.000 | 0.000 | 0.000 | 0.048 | 0.000 | 0.064 | 0.000 | 0.099 | 0.000 | 0.020 | 0.054 | n.d. | 0.12 | 4.00 | 0.55 |
| META1_3449 | conserved protein of unknown function                   | 0.000 | 0.113 | 0.000 | 0.000 | 0.000 | 0.000 | 0.107 | 0.000 | 0.060 | 0.045 | 0.000 | 0.054 | 1.60 | 0.50 | n.d. | 0.12 |
| META1_3452 | putative fatty acid oxidation complex subunit alpha (en | 2.103 | 1.699 | 2.177 | 1.353 | 2.138 | 1.772 | 1.950 | 2.281 | 1.667 | 1.969 | 1.865 | 1.969 | 1.35 | 0.90 | 1.58 | 0.49 |
| META1_3454 | protein of unknown function; putative exported protein  | 0.350 | 0.227 | 0.173 | 0.609 | 0.570 | 0.473 | 0.536 | 0.677 | 0.655 | 0.236 | 0.534 | 0.625 | 3.58 | 0.01 | 1.75 | 0.31 |
| META1_3455 | putative 3-ketoacyl-CoA thiolase (Fatty acid oxidati    | 0.973 | 0.589 | 0.693 | 0.473 | 0.475 | 0.591 | 0.343 | 0.619 | 0.476 | 0.717 | 0.524 | 0.484 | 0.91 | 0.11 | 1.38 | 0.65 |
| META1_3456 | acyl-CoA dehydrogenase                                  | 0.117 | 0.612 | 0.569 | 0.000 | 0.428 | 0.284 | 0.557 | 0.580 | 0.576 | 0.481 | 0.302 | 0.571 | 1.60 | 0.40 | 2.83 | 0.46 |
| META1_3457 | conserved protein of unknown function                   | 0.000 | 0.091 | 0.124 | 0.338 | 0.831 | 0.449 | 0.536 | 0.522 | 0.576 | 0.082 | 0.595 | 0.544 | 0.90 | 0.67 | 1.37 | 0.78 |
| META1_3460 | conserved protein of unknown function                   | 0.156 | 0.136 | 0.148 | 0.135 | 0.095 | 0.071 | 0.171 | 0.174 | 0.159 | 0.145 | 0.091 | 0.168 | 1.56 | 0.05 | 2.78 | 0.04 |
| META1_3461 | conserved membrane protein of unknown function; put     | 0.000 | 0.000 | 0.000 | 0.000 | 0.000 | 0.000 | 0.064 | 0.077 | 0.000 | 0.000 | 0.000 | 0.047 | n.d. | 0.12 | n.d. | 0.12 |
| META1_3462 | putative oxidoreductase precursor (tat pathway signa    | 0.000 | 0.113 | 0.000 | 0.000 | 0.000 | 0.000 | 0.000 | 0.000 | 0.000 | 0.045 | 0.000 | 0.000 | 0.00 | 0.37 | n.d. | n.d. |
| META1_3464 | nitrate reductase                                       | 0.234 | 0.612 | 0.520 | 0.000 | 0.475 | 0.278 | 0.428 | 0.387 | 0.307 | 0.464 | 0.363 | 0.403 | 1.11 | 0.90 | 1.67 | 0.37 |
| META1_3465 | threonine synthase                                      | 1.051 | 0.929 | 0.742 | 0.947 | 1.378 | 1.229 | 0.836 | 0.928 | 0.913 | 0.889 | 1.250 | 0.894 | 1.36 | 0.94 | 1.07 | 0.08 |
| META1_3467 | putative surfact locus 1 family protein (surf1-like)    | 0.000 | 0.068 | 0.000 | 0.000 | 0.119 | 0.095 | 0.107 | 0.116 | 0.060 | 0.027 | 0.091 | 0.094 | 0.67 | 0.13 | 1.56 | 0.35 |
| META1_3468 | conserved protein of unknown function; putative mem     | 0.000 | 0.000 | 0.000 | 0.000 | 0.000 | 0.000 | 0.043 | 0.039 | 0.000 | 0.000 | 0.000 | 0.027 | n.d. | 0.12 | n.d. | 0.12 |
| META1_3469 | cytochrome c oxidase subunit III                        | 0.000 | 0.136 | 0.124 | 0.000 | 0.190 | 0.284 | 0.107 | 0.000 | 0.000 | 0.100 | 0.202 | 0.034 | 0.45 | 0.53 | 0.25 | 0.57 |
| META1_3470 | putative cytochrome-c oxidase assembly protein (coxG)   | 0.000 | 0.000 | 0.000 | 0.000 | 0.071 | 0.047 | 0.129 | 0.077 | 0.099 | 0.000 | 0.050 | 0.101 | n.d. | 0.00 | 3.00 | 0.45 |
| META1_3471 | putative CoxF                                           | 0.000 | 0.000 | 0.000 | 0.000 | 0.119 | 0.071 | 0.064 | 0.000 | 0.000 | 0.000 | 0.081 | 0.020 | n.d. | 0.37 | 0.38 | 0.54 |
| META1_3473 | cytochrome c oxidase subunit I                          | 0.195 | 0.521 | 0.445 | 0.338 | 0.594 | 0.614 | 0.364 | 0.309 | 0.258 | 0.417 | 0.564 | 0.309 | 1.00 | 0.67 | 0.82 | 0.09 |
| META1_3474 | cytochrome c oxidase subunit II                         | 1.986 | 1.110 | 0.792 | 1.353 | 0.475 | 0.969 | 0.857 | 0.889 | 0.714 | 1.197 | 0.816 | 0.820 | 0.92 | 0.23 | 1.51 | 0.89 |
| META1_3475 | putative formate dehydrogenase accessory protein        | 0.117 | 0.136 | 0.198 | 0.135 | 0.214 | 0.071 | 0.214 | 0.193 | 0.238 | 0.154 | 0.141 | 0.215 | 1.88 | 0.09 | 2.29 | 0.18 |
| META1_3477 | glutamate synthase, large subunit                       | 3.037 | 5.189 | 5.444 | 8.116 | 5.867 | 6.025 | 5.827 | 5.625 | 6.589 | 4.781 | 6.269 | 6.015 | 1.70 | 0.19 | 1.44 | 0.46 |
| META1_3478 | glutamate synthase, small subunit, nucleotide-binding,  | 0.545 | 0.929 | 1.039 | 0.744 | 1.330 | 1.465 | 1.200 | 1.295 | 1.171 | 0.880 | 1.300 | 1.223 | 1.88 | 0.11 | 1.41 | 0.74 |
| META1_3483 | protein of unknown function; putative exported protein  | 0.000 | 0.045 | 0.124 | 0.000 | 0.095 | 0.095 | 0.000 | 0.060 | 0.060 | 0.064 | 0.081 | 0.020 | 0.43 | 0.53 | 0.38 | 0.55 |
| META1_3484 | putative membrane bound ytic murein transglycosylas     | 0.000 | 0.045 | 0.000 | 0.000 | 0.000 | 0.047 | 0.000 | 0.000 | 0.000 | 0.000 | 0.000 | 0.000 | 0.00 | 0.37 | 0.00 | 0.37 |
| META1_3485 | UDP-galactose 4-epimerase                               | 0.935 | 0.544 | 0.445 | 0.473 | 0.404 | 0.780 | 0.578 | 0.619 | 0.397 | 0.599 | 0.575 | 0.531 | 1.20 | 0.58 | 1.39 | 0.95 |
| META1_3486 | glucose-1-phosphate uridylyltransferase                 | 1.558 | 1.224 | 1.188 | 1.420 | 0.214 | 0.803 | 1.028 | 0.947 | 1.052 | 1.288 | 0.645 | 1.008 | 1.06 | 0.04 | 2.34 | 0.44 |
| META1_3487 | N-formylglutamate amidohydrolase (Beta-citryl-L-gluta   | 0.000 | 0.000 | 0.000 | 0.000 | 0.048 | 0.000 | 0.000 | 0.000 | 0.000 | 0.000 | 0.020 | 0.000 | n.d. | n.d. | 0.00 | 0.37 |
| META1_3488 | putative response regulator receiver; CheY-like protein | 0.000 | 0.181 | 0.272 | 0.203 | 0.143 | 0.260 | 0.150 | 0.097 | 0.218 | 0.172 | 0.202 | 0.155 | 1.21 | 0.32 | 1.15 | 0.38 |
| META1_3489 | glutaredoxin 3                                          | 0.000 | 0.113 | 0.074 | 0.000 | 0.071 | 0.071 | 0.150 | 0.135 | 0.139 | 0.073 | 0.060 | 0.141 | 2.63 | 0.44 | 3.50 | 0.48 |
| META1_3490 | Nitrilase/cyanide hydratase and apolipoprotein N-acyl   | 0.000 | 0.227 | 0.223 | 0.000 | 0.000 | 0.118 | 0.086 | 0.155 | 0.238 | 0.172 | 0.050 | 0.161 | 1.26 | 0.32 | 4.80 | 0.13 |
| META1_3491 | conserved protein of unknown function                   | 0.000 | 0.000 | 0.000 | 0.000 | 0.071 | 0.071 | 0.043 | 0.000 | 0.060 | 0.000 | 0.060 | 0.034 | n.d. | 0.12 | 0.83 | 0.96 |
| META1_3492 | Putative histidine kinase; putative HK, ATPase and sens | 0.000 | 0.227 | 0.247 | 0.000 | 0.071 | 0.118 | 0.150 | 0.097 | 0.119 | 0.181 | 0.081 | 0.121 | 0.90 | 0.28 | 2.25 | 0.41 |
| META1_3493 | Peptide methionine sulfoxide reductase msrA (Protein-   | 0.156 | 0.000 | 0.099 | 0.203 | 0.095 | 0.095 | 0.086 | 0.097 | 0.099 | 0.073 | 0.111 | 0.094 | 1.75 | 0.34 | 1.27 | 0.36 |
| META1_3494 | putative membrane protein                               | 0.000 | 0.000 | 0.000 | 0.000 | 0.166 | 0.000 | 0.000 | 0.000 | 0.000 | 0.000 | 0.071 | 0.000 | n.d. | n.d. | 0.00 | 0.37 |
| META1_3495 | conserved protein of unknown function                   | 0.000 | 0.045 | 0     |       |       |       |       |       |       |       |       |       |      |      |      |      |

|            |                                                                  |       |       |       |       |       |       |       |       |       |       |       |       |       |      |      |      |
|------------|------------------------------------------------------------------|-------|-------|-------|-------|-------|-------|-------|-------|-------|-------|-------|-------|-------|------|------|------|
| META1_3630 | conserved protein of unknown function; putative export           | 0.000 | 0.068 | 0.000 | 0.000 | 0.048 | 0.000 | 0.043 | 0.155 | 0.060 | 0.027 | 0.020 | 0.087 | 4.33  | 0.12 | 6.50 | 0.14 |
| META1_3632 | NAD(PH)-dependent FMN reductase                                  | 0.000 | 0.068 | 0.074 | 0.000 | 0.285 | 0.189 | 0.300 | 0.483 | 0.437 | 0.054 | 0.202 | 0.410 | 10.17 | 0.67 | 3.05 | 0.47 |
| META1_3633 | alkanesulfonate transport protein, periplasmic-binding           | 0.000 | 0.000 | 0.000 | 0.000 | 0.000 | 0.000 | 0.236 | 0.155 | 0.179 | 0.000 | 0.000 | 0.188 | n.d.  | 0.00 | n.d. | 0.00 |
| META1_3636 | alkanesulfonate transport protein, ATP-binding protein           | 0.000 | 0.000 | 0.000 | 0.000 | 0.000 | 0.000 | 0.043 | 0.000 | 0.040 | 0.000 | 0.000 | 0.027 | n.d.  | 0.12 | n.d. | 0.12 |
| META1_3637 | alkanesulfonate monooxygenase                                    | 0.000 | 0.091 | 0.000 | 0.000 | 0.143 | 0.189 | 0.343 | 0.232 | 0.298 | 0.036 | 0.141 | 0.289 | 10.75 | 0.18 | 3.07 | 0.47 |
| META1_3638 | alkanesulfonate transport protein, periplasmic-binding           | 0.000 | 0.068 | 0.000 | 0.000 | 0.000 | 0.071 | 0.171 | 0.135 | 0.119 | 0.027 | 0.030 | 0.141 | 0.035 | 0.10 | 7.00 | 0.15 |
| META1_3639 | alkanesulfonate transport protein, periplasmic-binding           | 0.000 | 0.181 | 0.074 | 0.000 | 0.000 | 0.118 | 0.321 | 0.232 | 0.258 | 0.100 | 0.050 | 0.269 | 3.64  | 0.51 | 8.00 | 0.16 |
| META1_3641 | conserved protein of unknown function                            | 0.000 | 0.091 | 0.000 | 0.000 | 0.071 | 0.047 | 0.064 | 0.000 | 0.119 | 0.036 | 0.050 | 0.060 | 2.25  | 0.52 | 1.80 | 0.95 |
| META1_3642 | conserved protein of unknown function; putative export           | 0.857 | 0.816 | 0.742 | 0.541 | 0.499 | 0.425 | 0.343 | 0.483 | 0.397 | 0.798 | 0.474 | 0.410 | 0.69  | 0.00 | 1.30 | 0.20 |
| META1_3644 | conserved protein of unknown function; putative Trans            | 0.000 | 0.045 | 0.049 | 0.000 | 0.238 | 0.095 | 0.107 | 0.213 | 0.159 | 0.036 | 0.141 | 0.161 | 0.60  | 0.55 | 1.71 | 0.38 |
| META1_3645 | conserved protein of unknown function                            | 0.000 | 0.136 | 0.099 | 0.000 | 0.048 | 0.000 | 0.129 | 0.097 | 0.040 | 0.091 | 0.020 | 0.087 | 1.30  | 0.33 | 6.50 | 0.14 |
| META1_3646 | Transglutaminase-like domain                                     | 0.000 | 0.113 | 0.049 | 0.000 | 0.095 | 0.047 | 0.086 | 0.077 | 0.060 | 0.064 | 0.060 | 0.074 | 1.57  | 0.37 | 1.83 | 0.39 |
| META1_3648 | putative short-chain dehydrogenase/reductase SDR                 | 0.389 | 0.385 | 0.445 | 0.338 | 0.261 | 0.402 | 0.471 | 0.367 | 0.258 | 0.408 | 0.333 | 0.363 | 1.20  | 0.50 | 1.64 | 0.74 |
| META1_3652 | aldehyde dehydrogenase; chloroacetaldehyde dehydro               | 5.919 | 2.470 | 3.439 | 2.908 | 1.758 | 1.630 | 2.507 | 2.435 | 1.846 | 3.629 | 1.875 | 2.258 | 0.84  | 0.14 | 1.81 | 0.65 |
| META1_3654 | putative ornithine/diaminopimelate PLP-dependent de              | 0.000 | 0.295 | 0.272 | 0.000 | 0.214 | 0.213 | 0.257 | 0.193 | 0.159 | 0.218 | 0.181 | 0.202 | 1.25  | 0.32 | 1.67 | 0.36 |
| META1_3655 | putative AMP-dependent synthetase and ligase                     | 0.000 | 0.227 | 0.223 | 0.000 | 0.356 | 0.284 | 0.364 | 0.251 | 0.298 | 0.172 | 0.272 | 0.302 | 2.37  | 0.42 | 1.67 | 0.37 |
| META1_3659 | conserved protein of unknown function; putative export           | 0.896 | 0.136 | 0.247 | 0.676 | 0.309 | 0.543 | 0.214 | 0.174 | 0.159 | 0.354 | 0.464 | 0.181 | 0.69  | 0.39 | 0.59 | 0.02 |
| META1_3660 | Adenine deaminase (Adenase) [Adenine ligase                      | 0.117 | 0.159 | 0.223 | 0.000 | 0.048 | 0.000 | 0.129 | 0.039 | 0.040 | 0.172 | 0.020 | 0.067 | 0.53  | 0.08 | 5.00 | 0.13 |
| META1_3661 | Ribosomal RNA large subunit methyltransferase ] (rRNA            | 0.078 | 0.136 | 0.124 | 0.000 | 0.095 | 0.142 | 0.107 | 0.174 | 0.060 | 0.118 | 0.101 | 0.114 | 1.31  | 0.88 | 1.70 | 0.36 |
| META1_3662 | exopolyphosphatase                                               | 0.000 | 0.045 | 0.000 | 0.000 | 0.000 | 0.047 | 0.000 | 0.039 | 0.000 | 0.018 | 0.020 | 0.013 | 1.00  | 0.99 | 1.00 | 0.99 |
| META1_3663 | putative glycosyl transferase precursor, putative memb           | 0.000 | 0.000 | 0.000 | 0.000 | 0.048 | 0.047 | 0.064 | 0.039 | 0.060 | 0.000 | 0.040 | 0.054 | n.d.  | 0.00 | 2.00 | 0.39 |
| META1_3665 | phytoene desaturase (phytoene dehydrogenase)                     | 0.273 | 0.136 | 0.371 | 0.135 | 0.404 | 0.165 | 0.364 | 0.425 | 0.496 | 0.254 | 0.262 | 0.430 | 2.29  | 0.14 | 2.46 | 0.11 |
| META1_3667 | putative membrane component of an ABC transporter                | 0.000 | 0.000 | 0.049 | 0.000 | 0.000 | 0.000 | 0.000 | 0.077 | 0.000 | 0.018 | 0.000 | 0.027 | 2.00  | 0.98 | n.d. | 0.37 |
| META1_3670 | putative phytoene dehydrogenase                                  | 0.000 | 0.295 | 0.297 | 0.203 | 0.356 | 0.165 | 0.257 | 0.232 | 0.357 | 0.227 | 0.252 | 0.282 | 1.68  | 0.36 | 1.68 | 0.51 |
| META1_3671 | conserved protein of unknown function                            | 0.000 | 0.000 | 0.000 | 0.000 | 0.119 | 0.071 | 0.107 | 0.077 | 0.139 | 0.000 | 0.081 | 0.108 | n.d.  | 0.00 | 2.00 | 0.39 |
| META1_3672 | conserved protein of unknown function                            | 0.000 | 0.045 | 0.000 | 0.000 | 0.000 | 0.000 | 0.086 | 0.097 | 0.079 | 0.018 | 0.000 | 0.087 | 6.50  | 0.15 | n.d. | 0.00 |
| META1_3673 | conserved protein of unknown function                            | 0.000 | 0.068 | 0.074 | 0.000 | 0.000 | 0.000 | 0.000 | 0.000 | 0.000 | 0.054 | 0.000 | 0.000 | 0.00  | 0.12 | n.d. | n.d. |
| META1_3675 | crotonase                                                        | 0.701 | 0.521 | 0.198 | 0.473 | 0.594 | 0.331 | 0.343 | 0.290 | 0.437 | 0.445 | 0.464 | 0.356 | 1.08  | 0.69 | 1.15 | 0.29 |
| META1_3677 | putative metallophosphatase                                      | 0.000 | 0.000 | 0.000 | 0.000 | 0.000 | 0.142 | 0.086 | 0.097 | 0.060 | 0.000 | 0.060 | 0.081 | n.d.  | 0.00 | 2.00 | 0.09 |
| META1_3678 | conserved protein of unknown function                            | 0.000 | 0.000 | 0.000 | 0.000 | 0.000 | 0.000 | 0.000 | 0.000 | 0.040 | 0.000 | 0.000 | 0.013 | n.d.  | 0.37 | n.d. | 0.37 |
| META1_3679 | conserved protein of unknown function; putative export           | 0.623 | 0.566 | 0.371 | 0.135 | 0.309 | 0.496 | 0.300 | 0.251 | 0.179 | 0.508 | 0.363 | 0.242 | 0.64  | 0.63 | 1.00 | 0.08 |
| META1_3680 | putative glutathione S-transferase                               | 0.896 | 0.589 | 0.668 | 0.879 | 0.713 | 0.614 | 0.836 | 0.793 | 0.595 | 0.689 | 0.695 | 0.739 | 1.45  | 0.83 | 1.59 | 0.96 |
| META1_3682 | Glycine amidinotransferase (L-arginine:glycine amidinot          | 1.012 | 1.065 | 1.113 | 1.217 | 1.995 | 1.843 | 1.028 | 1.411 | 1.290 | 1.070 | 1.814 | 1.250 | 1.58  | 0.21 | 1.03 | 0.18 |
| META1_3683 | conserved protein of unknown function; putative memb             | 0.000 | 0.000 | 0.000 | 0.000 | 0.095 | 0.142 | 0.000 | 0.000 | 0.000 | 0.000 | 0.101 | 0.000 | n.d.  | n.d. | 0.00 | 0.12 |
| META1_3684 | protein of unknown function; putative exported-protein           | 0.506 | 0.566 | 0.594 | 0.676 | 0.428 | 0.449 | 0.471 | 0.464 | 0.675 | 0.562 | 0.474 | 0.538 | 1.29  | 0.73 | 1.70 | 0.83 |
| META1_3685 | putative glycosyl transferase, putative membrane-asso            | 0.000 | 0.000 | 0.000 | 0.000 | 0.048 | 0.118 | 0.000 | 0.000 | 0.000 | 0.000 | 0.071 | 0.000 | n.d.  | n.d. | 0.00 | 0.12 |
| META1_3686 | Radical SAM superfamily protein                                  | 0.662 | 0.770 | 0.742 | 0.744 | 0.879 | 1.110 | 0.814 | 1.082 | 0.973 | 0.735 | 0.958 | 0.961 | 1.77  | 0.05 | 1.51 | 0.72 |
| META1_3687 | conserved protein of unknown function; putative YdiC             | 0.000 | 0.091 | 0.074 | 0.000 | 0.000 | 0.000 | 0.171 | 0.174 | 0.159 | 0.064 | 0.000 | 0.168 | 3.57  | 0.48 | n.d. | 0.00 |
| META1_3689 | putative membrane protein with sterol sensing domain             | 1.207 | 1.156 | 1.311 | 2.299 | 2.162 | 1.748 | 2.057 | 1.933 | 2.104 | 1.225 | 2.006 | 2.030 | 2.24  | 0.00 | 1.52 | 0.89 |
| META1_3690 | Radical SAM superfamily protein                                  | 0.273 | 0.249 | 0.247 | 0.406 | 1.093 | 1.276 | 0.493 | 0.483 | 0.218 | 0.254 | 1.068 | 0.397 | 2.11  | 0.24 | 0.56 | 0.15 |
| META1_3691 | putative nucleoside phosphorylase                                | 0.078 | 0.159 | 0.124 | 0.000 | 0.190 | 0.213 | 0.150 | 0.193 | 0.198 | 0.127 | 0.171 | 0.181 | 1.93  | 0.12 | 1.59 | 0.36 |
| META1_3692 | putative capsule polysaccharide export outer membran             | 1.480 | 0.227 | 0.520 | 1.014 | 0.784 | 1.040 | 0.343 | 0.329 | 0.437 | 0.626 | 0.527 | 0.370 | 0.80  | 0.49 | 0.60 | 0.00 |
| META1_3693 | putative hydrolase, Cof-subfamily                                | 0.000 | 0.091 | 0.049 | 0.000 | 0.093 | 0.043 | 0.000 | 0.039 | 0.060 | 0.000 | 0.000 | 0.047 | 1.17  | 0.32 | n.d. | 0.37 |
| META1_3694 | glucokinase; glucanate transport, GNT1 system                    | 0.000 | 0.000 | 0.000 | 0.000 | 0.000 | 0.000 | 0.000 | 0.000 | 0.040 | 0.000 | 0.000 | 0.013 | n.d.  | 0.37 | n.d. | 0.37 |
| META1_3696 | 50S ribosomal subunit protein L32                                | 0.234 | 0.363 | 0.346 | 0.308 | 0.309 | 0.378 | 0.150 | 0.135 | 0.258 | 0.327 | 0.343 | 0.181 | 0.75  | 0.08 | 0.79 | 0.03 |
| META1_3699 | putative regulator for granule-associated proteins, PHB          | 0.623 | 0.385 | 0.396 | 0.473 | 0.736 | 0.662 | 0.750 | 0.715 | 0.794 | 0.445 | 0.665 | 0.753 | 2.29  | 0.03 | 1.70 | 0.21 |
| META1_3700 | beta-ketothiolase                                                | 9.073 | 5.461 | 5.468 | 4.734 | 3.682 | 4.158 | 3.385 | 3.151 | 3.434 | 6.305 | 4.042 | 3.320 | 7.21  | 0.02 | 1.23 | 0.04 |
| META1_3701 | acetoacetyl-CoA reductase                                        | 2.609 | 1.790 | 1.757 | 3.787 | 1.021 | 1.488 | 1.028 | 1.411 | 1.012 | 1.969 | 1.633 | 1.156 | 0.79  | 0.03 | 1.06 | 0.32 |
| META1_3702 | lipid A biosynthesis lauroyl acyltransferase                     | 0.156 | 0.249 | 0.074 | 0.000 | 0.143 | 0.260 | 0.171 | 0.251 | 0.119 | 0.163 | 0.171 | 0.181 | 1.50  | 0.67 | 1.59 | 0.36 |
| META1_3703 | aminopeptidase                                                   | 1.051 | 0.997 | 0.841 | 0.203 | 0.499 | 0.473 | 0.300 | 0.522 | 0.437 | 0.953 | 0.443 | 0.423 | 0.60  | 0.01 | 1.43 | 0.74 |
| META1_3704 | conserved protein of unknown function                            | 0.000 | 0.113 | 0.198 | 0.000 | 0.095 | 0.095 | 0.000 | 0.000 | 0.000 | 0.118 | 0.081 | 0.000 | 0.00  | 0.12 | 0.00 | 0.12 |
| META1_3705 | putative D-lactate dehydrogenase (cytochrome                     | 0.000 | 0.000 | 0.000 | 0.000 | 0.000 | 0.000 | 0.000 | 0.058 | 0.000 | 0.000 | 0.000 | 0.020 | n.d.  | 0.37 | n.d. | 0.37 |
| META1_3706 | putative Fumarylacetoacetate (FAA) hydrolase                     | 0.000 | 0.045 | 0.000 | 0.000 | 0.000 | 0.000 | 0.000 | 0.039 | 0.000 | 0.018 | 0.000 | 0.013 | 1.00  | 0.99 | n.d. | 0.37 |
| META1_3707 | NUDIX superfamily hydrolase                                      | 0.000 | 0.000 | 0.000 | 0.000 | 0.095 | 0.000 | 0.064 | 0.097 | 0.079 | 0.000 | 0.040 | 0.081 | n.d.  | 0.00 | 3.00 | 0.11 |
| META1_3712 | putative transcriptional regulator, Crp/Fnr family               | 0.000 | 0.000 | 0.000 | 0.000 | 0.048 | 0.000 | 0.000 | 0.000 | 0.000 | 0.000 | 0.020 | 0.000 | n.d.  | 0.12 | 0.00 | 0.37 |
| META1_3713 | conserved protein of unknown function; putative exported protein | 0.078 | 0.000 | 0.099 | 0.000 | 0.000 | 0.000 | 0.000 | 0.000 | 0.000 | 0.054 | 0.000 | 0.000 | 0.00  | 0.12 | n.d. | n.d. |
| META1_3716 | putative acyl-CoA dehydrogenase                                  | 0.000 | 0.000 | 0.000 | 0.000 | 0.000 | 0.000 | 0.086 | 0.058 | 0.000 | 0.000 | 0.000 | 0.047 | n.d.  | 0.12 | n.d. | 0.12 |
| META1_3717 | conserved protein of unknown function; putative OsmC             | 0.000 | 0.000 | 0.000 | 0.000 | 0.000 | 0.000 | 0.107 | 0.058 | 0.099 | 0.000 | 0.000 | 0.087 | n.d.  | 0.00 | n.d. | 0.00 |
| META1_3719 | putative ABC transporter, periplasmic protein                    | 0.000 | 0.000 | 0.000 | 0.000 | 0.000 | 0.071 | 0.000 | 0.000 | 0.000 | 0.000 | 0.030 | 0.000 | n.d.  | n.d. | 0.00 | 0.37 |
| META1_3726 | conserved protein of unknown function; putative export           | 0.000 | 0.000 | 0.000 | 0.000 | 0.048 | 0.047 | 0.000 | 0.000 | 0.000 | 0.000 | 0.040 | 0.000 | n.d.  | n.d. | 0.00 | 0.12 |
| META1_3730 | putative molecular chaperone, heat shock Hsp20 family            | 0.000 | 0.000 | 0.000 | 0.000 | 0.000 | 0.000 | 0.000 | 0.077 | 0.040 | 0.000 | 0.000 | 0.040 | n.d.  | 0.12 | n.d. | 0.12 |
| META1_3732 | UspA (universal stress protein) domain protein                   | 0.000 | 0.113 | 0.099 | 0.000 | 0.000 | 0.000 | 0.107 | 0.097 | 0.179 | 0.082 | 0.000 | 0.128 | 2.11  | 0.40 | n.d. | 0.00 |
| META1_3733 | conserved protein of unknown function                            | 0.000 | 0.091 | 0.000 | 0.000 | 0.000 | 0.000 | 0.000 | 0.000 | 0.040 | 0.036 | 0.000 | 0.013 | 0.50  | 0.96 | n.d. | 0.37 |
| META1_3735 | protein of unknown function                                      | 0.234 | 0.204 | 0.198 | 0.000 | 0.000 | 0.000 | 0.086 | 0.058 | 0.079 | 0.209 | 0.000 | 0.074 | 0.48  | 0.00 | n.d. | 0.00 |
| META1_3737 | conserved protein of unknown function                            | 0.000 | 0.159 | 0.000 | 0.000 | 0.000 | 0.000 | 0.000 | 0.000 | 0.040 | 0.064 | 0.000 | 0.013 | 0.29  | 0.92 | n.d. | 0.37 |
| META1_3742 | conserved protein of unknown function, putative unive            | 0.000 | 0.227 | 0.099 | 0.000 | 0.048 | 0.047 | 0.064 | 0.039 | 0.060 | 0.127 | 0.040 | 0.054 | 0.57  | 0.25 | 2.00 | 0.39 |
| META1_3748 | Alcohol dehydrogenase, zinc-binding. Isopropanol dehy            | 0.000 | 0.159 | 0.000 | 0.000 |       |       |       |       |       |       |       |       |       |      |      |      |

|            |                                                            |       |       |       |       |       |       |       |       |       |       |       |       |        |      |       |      |
|------------|------------------------------------------------------------|-------|-------|-------|-------|-------|-------|-------|-------|-------|-------|-------|-------|--------|------|-------|------|
| META1_3923 | putative oxidoreductase, xanthine dehydrogenase, FAD       | 0.000 | 0.091 | 0.000 | 0.000 | 0.000 | 0.000 | 0.000 | 0.000 | 0.000 | 0.036 | 0.000 | 0.000 | 0.00   | 0.37 | n.d.  | n.d. |
| META1_3924 | oxidoreductase, molybdopterin-binding subunit              | 0.000 | 0.091 | 0.049 | 0.000 | 0.000 | 0.000 | 0.000 | 0.039 | 0.000 | 0.054 | 0.000 | 0.013 | 0.33   | 0.55 | n.d.  | 0.37 |
| META1_3928 | putative monooxygenase with ATPase activity, luciferase    | 0.000 | 0.113 | 0.074 | 0.135 | 0.261 | 0.165 | 0.236 | 0.232 | 0.198 | 0.073 | 0.202 | 0.222 | 4.13   | 0.51 | 1.65  | 0.37 |
| META1_3930 | putative riboflavin biosynthesis protein RibD              | 0.000 | 0.068 | 0.000 | 0.000 | 0.095 | 0.000 | 0.000 | 0.077 | 0.079 | 0.027 | 0.040 | 0.054 | 2.67   | 0.53 | 2.00  | 0.51 |
| META1_3931 | protein of unknown function                                | 0.273 | 0.317 | 0.371 | 0.338 | 0.356 | 0.402 | 0.257 | 0.213 | 0.198 | 0.327 | 0.373 | 0.222 | 0.324  | 0.04 | 0.04  | 0.01 |
| META1_3932 | putative periplasmic glucan biosynthesis protein precursor | 0.000 | 0.159 | 0.148 | 0.000 | 0.143 | 0.189 | 0.043 | 0.059 | 0.000 | 0.138 | 0.176 | 0.027 | 0.31   | 0.85 | 0.29  | 0.84 |
| META1_3933 | putative membrane-associated glycosyl transferase          | 0.000 | 0.068 | 0.124 | 0.000 | 0.190 | 0.047 | 0.214 | 0.271 | 0.218 | 0.073 | 0.101 | 0.235 | 4.38   | 0.52 | 3.50  | 0.52 |
| META1_3934 | conserved protein of unknown function                      | 0.000 | 0.000 | 0.000 | 0.000 | 0.095 | 0.000 | 0.000 | 0.058 | 0.000 | 0.000 | 0.040 | 0.020 | n.d.   | 0.37 | 0.75  | 0.97 |
| META1_3937 | protein of unknown function                                | 0.000 | 0.000 | 0.000 | 0.000 | 0.071 | 0.071 | 0.000 | 0.039 | 0.000 | 0.000 | 0.060 | 0.013 | n.d.   | 0.37 | 0.33  | 0.56 |
| META1_3938 | conserved protein of unknown function                      | 0.000 | 0.045 | 0.049 | 0.000 | 0.000 | 0.000 | 0.000 | 0.000 | 0.000 | 0.036 | 0.000 | 0.000 | 0.00   | 0.12 | n.d.  | n.d. |
| META1_3958 | protein of unknown function                                | 0.000 | 0.000 | 0.000 | 0.000 | 0.000 | 0.000 | 0.043 | 0.000 | 0.000 | 0.000 | 0.000 | 0.013 | n.d.   | 0.37 | n.d.  | 0.37 |
| META1_3962 | protein of unknown function                                | 0.000 | 0.249 | 0.124 | 0.000 | 0.000 | 0.118 | 0.193 | 0.077 | 0.119 | 0.145 | 0.050 | 0.128 | 1.19   | 0.32 | 3.80  | 0.12 |
| META1_3993 | conserved protein of unknown function                      | 0.000 | 0.000 | 0.000 | 0.000 | 0.238 | 0.189 | 0.000 | 0.058 | 0.000 | 0.000 | 0.181 | 0.020 | n.d.   | 0.37 | 0.17  | 0.61 |
| META1_3994 | protein of unknown function                                | 0.000 | 0.000 | 0.000 | 0.000 | 0.048 | 0.000 | 0.000 | 0.000 | 0.000 | 0.000 | 0.020 | 0.000 | n.d.   | n.d. | 0.00  | 0.37 |
| META1_4019 | Phage-related protein                                      | 0.078 | 0.113 | 0.049 | 0.000 | 0.238 | 0.284 | 0.129 | 0.155 | 0.099 | 0.082 | 0.222 | 0.128 | 2.11   | 0.14 | 0.86  | 0.28 |
| META1_4039 | Glucose-1-phosphate thymidyltransferase                    | 0.350 | 0.385 | 0.148 | 0.271 | 0.048 | 0.142 | 0.364 | 0.367 | 0.238 | 0.290 | 0.121 | 0.323 | 1.50   | 0.67 | 4.00  | 0.14 |
| META1_4040 | dTDP-4-dehydrothiamine reductase                           | 0.273 | 0.453 | 0.346 | 0.203 | 0.190 | 0.236 | 0.343 | 0.367 | 0.298 | 0.372 | 0.212 | 0.336 | 1.22   | 0.80 | 2.38  | 0.01 |
| META1_4041 | dTDP-glucose 4,6-dehydratase                               | 0.701 | 0.295 | 0.272 | 0.203 | 0.214 | 0.213 | 0.300 | 0.174 | 0.179 | 0.381 | 0.212 | 0.215 | 0.76   | 0.16 | 1.52  | 0.99 |
| META1_4042 | dTDP-4-dehydrothiamine 3,5-epimerase                       | 0.818 | 0.793 | 0.792 | 0.744 | 0.760 | 0.638 | 0.814 | 0.619 | 0.595 | 0.798 | 0.706 | 0.672 | 1.14   | 0.14 | 1.43  | 0.61 |
| META1_4070 | conserved protein of unknown function                      | 0.467 | 0.589 | 0.445 | 0.000 | 0.166 | 0.071 | 0.193 | 0.135 | 0.238 | 0.508 | 0.101 | 0.188 | 0.50   | 0.01 | 2.80  | 0.46 |
| META1_4072 | conserved protein of unknown function                      | 0.234 | 0.340 | 0.173 | 0.000 | 0.000 | 0.000 | 0.000 | 0.000 | 0.000 | 0.254 | 0.000 | 0.000 | 0.00   | 0.00 | n.d.  | n.d. |
| META1_4087 | conserved protein of unknown function                      | 0.000 | 0.000 | 0.000 | 0.000 | 0.000 | 0.000 | 0.043 | 0.000 | 0.000 | 0.000 | 0.000 | 0.013 | n.d.   | 0.37 | n.d.  | 0.37 |
| META1_4089 | protein of unknown function                                | 0.000 | 0.045 | 0.099 | 0.000 | 0.095 | 0.189 | 0.043 | 0.058 | 0.079 | 0.054 | 0.121 | 0.060 | 1.50   | 0.36 | 0.75  | 0.27 |
| META1_4094 | ATP-dependent urea carboxylase                             | 0.000 | 0.000 | 0.000 | 0.000 | 0.000 | 0.000 | 0.000 | 0.077 | 0.060 | 0.000 | 0.000 | 0.047 | n.d.   | 0.12 | n.d.  | 0.12 |
| META1_4098 | putative glutamine synthetase II (glnT)                    | 0.000 | 0.000 | 0.000 | 0.000 | 0.000 | 0.000 | 0.043 | 0.000 | 0.000 | 0.000 | 0.000 | 0.013 | n.d.   | 0.37 | n.d.  | 0.37 |
| META1_4105 | glycine/betaine/proline transporter, Substrate-binding     | 0.078 | 0.295 | 0.074 | 0.000 | 0.000 | 0.000 | 0.000 | 0.000 | 0.040 | 0.163 | 0.000 | 0.013 | 0.11   | 0.17 | n.d.  | 0.37 |
| META1_4114 | conserved protein of unknown function                      | 0.000 | 0.000 | 0.000 | 0.000 | 0.000 | 0.000 | 0.000 | 0.039 | 0.040 | 0.000 | 0.000 | 0.027 | n.d.   | 0.12 | n.d.  | 0.12 |
| META1_4118 | putative NADH:flavin oxidoreductase/NADH oxidase, m        | 0.000 | 0.000 | 0.000 | 0.000 | 0.000 | 0.000 | 0.004 | 0.058 | 0.000 | 0.000 | 0.000 | 0.040 | n.d.   | 0.12 | n.d.  | 0.12 |
| META1_4129 | tonB-dependent siderophore receptor protein                | 0.428 | 0.000 | 0.000 | 0.338 | 0.000 | 0.000 | 0.000 | 0.000 | 0.000 | 0.100 | 0.050 | 0.000 | 0.00   | 0.37 | 0.00  | 0.37 |
| META1_4132 | Siderophore synthetase component                           | 0.117 | 0.045 | 0.049 | 0.000 | 0.000 | 0.000 | 0.000 | 0.000 | 0.000 | 0.064 | 0.000 | 0.000 | 0.00   | 0.00 | n.d.  | n.d. |
| META1_4133 | putative non-ribosomal peptide synthetase, putative ad     | 0.896 | 0.068 | 0.297 | 0.271 | 0.000 | 0.000 | 0.000 | 0.000 | 0.000 | 0.345 | 0.040 | 0.000 | 0.00   | 0.00 | 0.00  | 0.37 |
| META1_4134 | conserved protein of unknown function                      | 0.973 | 0.159 | 0.520 | 0.000 | 0.000 | 0.000 | 0.000 | 0.000 | 0.000 | 0.481 | 0.000 | 0.000 | 0.00   | 0.00 | n.d.  | n.d. |
| META1_4136 | conserved protein of unknown function                      | 0.000 | 0.045 | 0.049 | 0.000 | 0.000 | 0.000 | 0.000 | 0.000 | 0.000 | 0.036 | 0.000 | 0.000 | 0.00   | 0.12 | n.d.  | n.d. |
| META1_4137 | GCN5-related N-acetyltransferase                           | 0.818 | 0.340 | 0.247 | 0.338 | 0.000 | 0.000 | 0.000 | 0.058 | 0.000 | 0.417 | 0.050 | 0.020 | 0.07   | 0.24 | 0.60  | 0.90 |
| META1_4138 | protein of unknown function; putative exported protein     | 0.273 | 0.181 | 0.198 | 0.000 | 0.000 | 0.000 | 0.000 | 0.058 | 0.079 | 0.209 | 0.000 | 0.047 | 0.30   | 0.56 | n.d.  | 0.12 |
| META1_4139 | putative transcriptional regulator, TetR family            | 0.273 | 0.249 | 0.346 | 0.135 | 0.451 | 0.520 | 0.621 | 0.406 | 0.417 | 0.290 | 0.433 | 0.477 | 2.22   | 0.04 | 1.65  | 0.42 |
| META1_4140 | pyrroline-5-carboxylate reductase                          | 0.000 | 0.000 | 0.074 | 0.271 | 0.095 | 0.095 | 0.150 | 0.116 | 0.040 | 0.027 | 0.121 | 0.101 | 5.00   | 0.13 | 1.25  | 0.48 |
| META1_4142 | conserved protein of unknown function                      | 0.000 | 0.136 | 0.173 | 0.203 | 0.214 | 0.189 | 0.171 | 0.174 | 0.238 | 0.118 | 0.202 | 0.195 | 2.23   | 0.41 | 1.45  | 0.69 |
| META1_4143 | response regulator in two-component regulatory system      | 0.000 | 0.000 | 0.000 | 0.000 | 0.000 | 0.000 | 0.150 | 0.271 | 0.198 | 0.000 | 0.000 | 0.208 | n.d.   | 0.00 | n.d.  | 0.00 |
| META1_4144 | putative signal transduction histidine kinase precursor    | 0.000 | 0.000 | 0.000 | 0.000 | 0.000 | 0.000 | 0.086 | 0.155 | 0.099 | 0.000 | 0.000 | 0.114 | n.d.   | 0.00 | n.d.  | 0.00 |
| META1_4147 | putative glutathione S-transferase                         | 0.000 | 0.000 | 0.000 | 0.000 | 0.000 | 0.000 | 0.064 | 0.116 | 0.000 | 0.000 | 0.000 | 0.060 | n.d.   | 0.12 | n.d.  | 0.12 |
| META1_4148 | intracellular PHB depolymerase, polyhydroxyalkanoate       | 0.000 | 0.113 | 0.223 | 0.000 | 0.143 | 0.213 | 0.171 | 0.135 | 0.079 | 0.127 | 0.151 | 0.288 | 1.36   | 0.34 | 1.27  | 0.33 |
| META1_4149 | Ribosomal protein S2                                       | 0.000 | 0.145 | 0.148 | 0.000 | 0.145 | 0.148 | 0.064 | 0.194 | 0.032 | 0.306 | 0.534 | 0.914 | 3.68   | 0.37 | 2.57  | 0.17 |
| META1_4150 | putative response regulator; (CheY-like protein)           | 0.078 | 0.181 | 0.099 | 0.000 | 0.048 | 0.071 | 0.000 | 0.097 | 0.060 | 0.127 | 0.050 | 0.054 | 0.57   | 0.43 | 1.60  | 0.97 |
| META1_4153 | Mesaconyl-CoA hydratase. Part of the ethylmalonyl-Co       | 0.584 | 0.770 | 0.421 | 0.209 | 1.211 | 1.630 | 0.643 | 0.503 | 0.536 | 0.599 | 1.512 | 0.558 | 1.26   | 0.88 | 0.55  | 0.00 |
| META1_4154 | conserved protein of unknown function                      | 0.000 | 0.068 | 0.000 | 0.000 | 0.000 | 0.000 | 0.000 | 0.000 | 0.000 | 0.027 | 0.000 | 0.000 | 0.00   | 0.37 | n.d.  | n.d. |
| META1_4167 | putative sensory box/GGDEF family protein                  | 0.000 | 0.000 | 0.049 | 0.000 | 0.071 | 0.071 | 0.064 | 0.039 | 0.079 | 0.018 | 0.060 | 0.060 | 4.50   | 0.12 | 1.50  | 0.35 |
| META1_4169 | protein of unknown function                                | 0.000 | 0.091 | 0.000 | 0.135 | 0.071 | 0.071 | 0.129 | 0.000 | 0.079 | 0.036 | 0.081 | 0.067 | 2.50   | 0.53 | 1.25  | 0.36 |
| META1_4178 | conserved protein of unknown function                      | 0.000 | 0.045 | 0.049 | 0.000 | 0.048 | 0.000 | 0.000 | 0.000 | 0.040 | 0.036 | 0.020 | 0.013 | 0.50   | 0.53 | 1.00  | 0.99 |
| META1_4179 | protein of unknown function                                | 0.273 | 0.317 | 0.247 | 0.203 | 0.309 | 0.260 | 0.214 | 0.271 | 0.258 | 0.281 | 0.272 | 0.249 | 1.19   | 0.31 | 1.37  | 0.85 |
| META1_4187 | conserved protein of unknown function                      | 0.000 | 0.136 | 0.074 | 0.000 | 0.000 | 0.000 | 0.000 | 0.039 | 0.040 | 0.082 | 0.000 | 0.027 | 0.44   | 0.90 | n.d.  | 0.12 |
| META1_4188 | conserved protein of unknown function                      | 0.000 | 0.000 | 0.000 | 0.000 | 0.000 | 0.000 | 0.043 | 0.000 | 0.000 | 0.000 | 0.000 | 0.013 | n.d.   | 0.37 | n.d.  | 0.37 |
| META1_4210 | putative peroxidase, putative peroxidoxin                  | 0.000 | 0.000 | 0.000 | 0.000 | 0.000 | 0.000 | 0.043 | 0.000 | 0.000 | 0.000 | 0.000 | 0.013 | n.d.   | 0.37 | n.d.  | 0.37 |
| META1_4213 | putative alpha/beta hydrolase, putative epoxide hydrol     | 0.000 | 0.068 | 0.000 | 0.000 | 0.000 | 0.000 | 0.030 | 0.039 | 0.040 | 0.027 | 0.000 | 0.027 | 1.33   | 0.49 | n.d.  | 0.12 |
| META1_4214 | putative ABC transporter, periplasmic protein; putative    | 0.000 | 0.113 | 0.000 | 0.000 | 0.071 | 0.071 | 0.064 | 0.077 | 0.000 | 0.100 | 0.060 | 0.047 | 0.64   | 0.93 | 1.17  | 1.00 |
| META1_4222 | protein of unknown function                                | 0.000 | 0.045 | 0.000 | 0.000 | 0.000 | 0.000 | 0.000 | 0.000 | 0.000 | 0.018 | 0.000 | 0.000 | 0.00   | 0.00 | n.d.  | n.d. |
| META1_4223 | conserved protein of unknown function                      | 0.000 | 0.000 | 0.000 | 0.000 | 0.000 | 0.000 | 0.000 | 0.039 | 0.000 | 0.000 | 0.000 | 0.013 | n.d.   | 0.37 | n.d.  | 0.37 |
| META1_4225 | putative oxidoreductase, aldo/keto reductase family        | 0.389 | 0.317 | 0.198 | 0.135 | 0.000 | 0.071 | 0.086 | 0.135 | 0.079 | 0.290 | 0.050 | 0.101 | 0.47   | 0.01 | 3.00  | 0.37 |
| META1_4227 | putative Isochorismatase hydrolase                         | 0.740 | 0.544 | 0.520 | 0.406 | 0.380 | 0.307 | 0.428 | 0.522 | 0.417 | 0.581 | 0.353 | 0.457 | 1.06   | 0.11 | 1.94  | 0.11 |
| META1_4231 | conserved protein of unknown function, putative dom        | 0.857 | 0.657 | 0.445 | 0.812 | 0.475 | 0.260 | 0.450 | 0.425 | 0.437 | 0.626 | 0.433 | 0.437 | 0.94   | 0.13 | 1.51  | 0.86 |
| META1_4232 | putative oxidoreductase precursor, putative aldo/keto      | 0.273 | 0.544 | 0.371 | 0.000 | 0.000 | 0.071 | 0.171 | 0.213 | 0.238 | 0.417 | 0.030 | 0.208 | 0.67   | 0.05 | 10.33 | 0.17 |
| META1_4233 | putative methyltransferase with SAM-dependent meth         | 0.000 | 0.000 | 0.000 | 0.000 | 0.048 | 0.000 | 0.000 | 0.000 | 0.000 | 0.000 | 0.020 | 0.000 | n.d.   | n.d. | 0.00  | 0.37 |
| META1_4234 | conserved protein of unknown function; putative pseud      | 0.000 | 0.498 | 0.421 | 0.406 | 0.618 | 0.732 | 0.557 | 0.638 | 0.357 | 0.354 | 0.635 | 0.517 | 1.97   | 0.39 | 1.22  | 0.65 |
| META1_4242 | putative short-chain dehydrogenase/reductase SDR           | 0.000 | 0.136 | 0.000 | 0.000 | 0.000 | 0.000 | 0.000 | 0.000 | 0.000 | 0.054 | 0.000 | 0.000 | 0.00   | 0.37 | n.d.  | n.d. |
| META1_4243 | tRNA-specific adenosine deaminase                          | 0.000 | 0.045 | 0.000 | 0.000 | 0.048 | 0.047 | 0.043 | 0.000 | 0.079 | 0.018 | 0.040 | 0.040 | 3.00   | 0.53 | 1.50  | 0.98 |
| META1_4244 | phosphoribosylglycinamide synthetase (GAR synthetase       | 0.273 | 0.317 | 0.322 | 0.338 | 0.641 | 0.496 | 0.450 | 0.503 | 0.437 | 0.308 | 0.534 | 0.464 | 2.03   | 0.00 | 1.30  | 0.89 |
| META1_4247 | putative exonuclease VII, large subunit OB-fold nucleic    | 0.000 | 0.091 | 0.173 | 0.000 | 0.333 | 0.071 | 0.236 | 0.174 | 0.238 | 0.100 | 0.171 | 0.215 | 2.91</ |      |       |      |

|            |                                                           |       |       |       |        |        |        |        |        |        |       |        |        |      |      |      |      |
|------------|-----------------------------------------------------------|-------|-------|-------|--------|--------|--------|--------|--------|--------|-------|--------|--------|------|------|------|------|
| META1_4341 | Aspartate ammonia-lyase (Aspartase)                       | 0.273 | 0.612 | 0.445 | 0.000  | 0.166  | 0.047  | 0.279  | 0.309  | 0.218  | 0.472 | 0.091  | 0.269  | 0.77 | 0.15 | 4.44 | 0.56 |
| META1_4345 | putative porin                                            | 0.000 | 0.000 | 0.049 | 0.000  | 0.000  | 0.000  | 0.000  | 0.000  | 0.000  | 0.018 | 0.000  | 0.000  | 0.00 | 0.37 | n.d. | n.d. |
| META1_4346 | glutamate and aspartate transporter subunit ; periplasmic | 0.818 | 0.453 | 0.619 | 0.541  | 0.000  | 0.189  | 0.321  | 0.367  | 0.198  | 0.599 | 0.161  | 0.296  | 0.67 | 0.04 | 2.75 | 0.36 |
| META1_4347 | glutamate and aspartate transporter subunit ; membra      | 0.000 | 0.000 | 0.000 | 0.000  | 0.071  | 0.000  | 0.000  | 0.058  | 0.060  | 0.000 | 0.030  | 0.040  | n.d. | 0.12 | 2.00 | 0.51 |
| META1_4348 | glutamate and aspartate transporter subunit ; ATP-bind    | 0.000 | 0.091 | 0.049 | 0.000  | 0.049  | 0.000  | 0.000  | 0.077  | 0.000  | 0.054 | 0.000  | 0.000  | 0.67 | 0.51 | 0.00 | 0.27 |
| META1_4353 | conserved protein of unknown function; putative export    | 2.414 | 1.54  | 1.732 | 1.285  | 0.546  | 0.496  | 0.557  | 0.850  | 0.675  | 1.814 | 0.656  | 0.699  | 0.52 | 0.62 | 1.65 | 0.93 |
| META1_4354 | conserved protein of unknown function; putative MutT      | 0.000 | 0.000 | 0.000 | 0.000  | 0.000  | 0.000  | 0.000  | 0.039  | 0.000  | 0.000 | 0.000  | 0.013  | n.d. | 0.37 | n.d. | 0.37 |
| META1_4357 | putative non-ribosomal peptide synthetase                 | 0.156 | 0.498 | 0.520 | 0.406  | 0.451  | 0.378  | 0.386  | 0.367  | 0.516  | 0.426 | 0.413  | 0.423  | 1.34 | 0.65 | 1.54 | 0.89 |
| META1_4359 | conserved protein of unknown function; putative alpha     | 0.156 | 0.159 | 0.124 | 0.338  | 0.238  | 0.354  | 0.279  | 0.232  | 0.218  | 0.145 | 0.302  | 0.242  | 2.25 | 0.01 | 1.20 | 0.18 |
| META1_4360 | cysteine desulfurase (RNA sulfurtransferase), PUP-dep     | 0.000 | 0.091 | 0.074 | 0.271  | 0.428  | 0.496  | 0.279  | 0.290  | 0.278  | 0.064 | 0.433  | 0.282  | 6.00 | 0.58 | 0.98 | 0.16 |
| META1_4361 | FeS assembly protein SufB                                 | 0.779 | 1.065 | 1.212 | 1.082  | 1.544  | 1.536  | 0.964  | 0.986  | 1.052  | 1.052 | 1.472  | 1.001  | 1.28 | 0.99 | 1.02 | 0.06 |
| META1_4363 | FeS assembly ATPase SufC                                  | 1.129 | 0.906 | 1.014 | 1.420  | 0.523  | 1.181  | 1.028  | 1.005  | 1.012  | 0.998 | 0.937  | 1.015  | 1.37 | 0.97 | 1.62 | 0.86 |
| META1_4364 | FeS assembly protein SufD                                 | 1.090 | 1.518 | 2.004 | 1.488  | 1.164  | 1.040  | 0.921  | 1.102  | 0.992  | 1.597 | 1.159  | 1.008  | 0.85 | 0.10 | 1.30 | 0.18 |
| META1_4365 | cysteine desulfurase                                      | 0.312 | 0.453 | 0.346 | 0.406  | 0.451  | 0.591  | 0.557  | 0.309  | 0.278  | 0.381 | 0.504  | 0.376  | 1.33 | 0.98 | 1.12 | 0.33 |
| META1_4366 | conserved protein of unknown function; putative DUF5      | 0.000 | 0.000 | 0.000 | 0.000  | 0.095  | 0.095  | 0.000  | 0.097  | 0.000  | 0.000 | 0.081  | 0.034  | n.d. | 0.37 | 0.63 | 0.52 |
| META1_4368 | iron-sulfur cluster assembly accessory protein            | 0.000 | 0.000 | 0.000 | 0.135  | 0.095  | 0.071  | 0.107  | 0.077  | 0.060  | 0.000 | 0.091  | 0.081  | n.d. | 0.00 | 1.33 | 0.46 |
| META1_4369 | putative diguanylate cyclase (2 GGDEF motifs)             | 0.000 | 0.000 | 0.000 | 0.000  | 0.048  | 0.000  | 0.043  | 0.039  | 0.000  | 0.000 | 0.020  | 0.027  | n.d. | 0.12 | 2.00 | 0.51 |
| META1_4370 | RNA helicase                                              | 0.662 | 0.997 | 1.163 | 0.879  | 1.259  | 0.827  | 0.943  | 0.850  | 1.032  | 0.980 | 1.018  | 0.941  | 1.30 | 0.89 | 1.39 | 0.82 |
| META1_4374 | protein of unknown function                               | 0.234 | 0.272 | 0.148 | 0.203  | 0.380  | 0.307  | 0.236  | 0.232  | 0.377  | 0.218 | 0.323  | 0.282  | 1.75 | 0.34 | 1.31 | 0.86 |
| META1_4376 | conserved protein of unknown function                     | 0.000 | 0.000 | 0.000 | 0.000  | 0.048  | 0.000  | 0.000  | 0.039  | 0.000  | 0.000 | 0.020  | 0.013  | n.d. | 0.37 | 1.00 | 0.99 |
| META1_4377 | protein of unknown function                               | 0.078 | 0.000 | 0.074 | 0.000  | 0.000  | 0.000  | 0.000  | 0.000  | 0.000  | 0.045 | 0.000  | 0.000  | 0.00 | 0.12 | n.d. | n.d. |
| META1_4378 | putative haloacid dehalogenase family hydrolase           | 0.000 | 0.227 | 0.099 | 0.000  | 0.000  | 0.000  | 0.086  | 0.058  | 0.060  | 0.127 | 0.000  | 0.067  | 0.71 | 0.27 | n.d. | 0.00 |
| META1_4379 | protein of unknown function                               | 0.000 | 0.000 | 0.000 | 0.000  | 0.000  | 0.071  | 0.000  | 0.058  | 0.060  | 0.000 | 0.030  | 0.040  | n.d. | 0.12 | 2.00 | 0.51 |
| META1_4380 | putative ABC transporter, ATPase                          | 0.078 | 0.136 | 0.074 | 0.000  | 0.119  | 0.095  | 0.193  | 0.213  | 0.119  | 0.100 | 0.091  | 0.175  | 2.36 | 0.08 | 2.89 | 0.45 |
| META1_4381 | putative acyl-CoA thioesterase precursor (tesA-like)      | 0.273 | 0.498 | 0.470 | 0.473  | 0.428  | 0.425  | 0.407  | 0.483  | 0.496  | 0.435 | 0.433  | 0.464  | 1.44 | 0.52 | 1.60 | 0.59 |
| META1_4382 | putative 2'-5' RNA ligase                                 | 0.467 | 0.431 | 0.223 | 0.000  | 0.166  | 0.189  | 0.279  | 0.193  | 0.198  | 0.363 | 0.151  | 0.222  | 0.83 | 0.14 | 2.20 | 0.41 |
| META1_4383 | Preprotein translocase subunit SecE-like protein          | 0.117 | 0.000 | 0.049 | 0.000  | 0.071  | 0.142  | 0.086  | 0.097  | 0.099  | 0.045 | 0.091  | 0.094  | 2.80 | 0.40 | 1.56 | 0.37 |
| META1_4384 | transcription termination factor                          | 1.363 | 0.929 | 0.940 | 1.894  | 1.354  | 1.158  | 0.857  | 1.160  | 1.072  | 1.034 | 1.351  | 1.035  | 1.35 | 0.82 | 1.15 | 0.12 |
| META1_4385 | 50S ribosomal protein L11                                 | 0.584 | 0.181 | 0.148 | 1.082  | 1.069  | 0.921  | 1.178  | 1.218  | 1.171  | 0.263 | 1.008  | 1.190  | 6.10 | 0.02 | 1.77 | 0.05 |
| META1_4386 | 50S ribosomal subunit protein L1                          | 1.713 | 1.337 | 1.856 | 3.923  | 1.116  | 1.937  | 2.035  | 2.609  | 2.143  | 1.615 | 1.885  | 2.272  | 1.90 | 0.06 | 1.81 | 0.80 |
| META1_4388 | putative cytochrome P450 reductase                        | 0.000 | 0.000 | 0.000 | 0.000  | 0.071  | 0.000  | 0.043  | 0.058  | 0.039  | 0.000 | 0.030  | 0.034  | n.d. | 0.12 | 1.67 | 0.50 |
| META1_4390 | putative Ferredoxin; putative 4Fe-4S ferredoxins domain   | 0.000 | 0.000 | 0.000 | 0.000  | 0.000  | 0.000  | 0.000  | 0.039  | 0.000  | 0.000 | 0.000  | 0.013  | n.d. | 0.37 | n.d. | 0.37 |
| META1_4392 | putative glycosyl transferase                             | 0.000 | 0.000 | 0.000 | 0.000  | 0.000  | 0.047  | 0.107  | 0.077  | 0.099  | 0.000 | 0.020  | 0.094  | n.d. | 0.00 | 7.00 | 0.15 |
| META1_4393 | aspartate tRNA synthetase                                 | 1.363 | 1.110 | 1.509 | 1.488  | 1.924  | 1.252  | 1.564  | 1.353  | 1.052  | 1.315 | 1.572  | 1.317  | 1.35 | 0.96 | 1.26 | 0.40 |
| META1_4394 | biotin synthetase                                         | 0.000 | 0.000 | 0.000 | 0.135  | 0.143  | 0.213  | 0.257  | 0.174  | 0.099  | 0.000 | 0.171  | 0.175  | n.d. | 0.00 | 1.53 | 0.94 |
| META1_4395 | protein of unknown function; putative exported protein    | 0.117 | 0.227 | 0.198 | 0.000  | 0.000  | 0.000  | 0.000  | 0.000  | 0.000  | 0.191 | 0.000  | 0.000  | 0.00 | 0.00 | n.d. | n.d. |
| META1_4396 | 2-hydroxyhepta-2,4-diene-1, 7-diolate isomerase/5-carb    | 0.584 | 0.498 | 0.297 | 0.406  | 0.000  | 0.213  | 0.236  | 0.348  | 0.357  | 0.445 | 0.151  | 0.316  | 0.96 | 0.21 | 3.13 | 0.38 |
| META1_4397 | putative long-chain fatty acid outer membrane transpo     | 0.701 | 0.408 | 0.544 | 0.947  | 0.190  | 0.402  | 0.514  | 0.329  | 0.417  | 0.526 | 0.393  | 0.417  | 0.07 | 0.26 | 1.59 | 0.99 |
| META1_4398 | conserved protein of unknown function; putative preph     | 0.000 | 0.000 | 0.000 | 0.000  | 0.214  | 0.142  | 0.000  | 0.058  | 0.000  | 0.000 | 0.151  | 0.020  | n.d. | 0.37 | 0.20 | 0.59 |
| META1_4400 | conserved protein of unknown function; putative Fe-S      | 0.000 | 0.136 | 0.272 | 0.000  | 0.261  | 0.118  | 0.171  | 0.213  | 0.159  | 0.154 | 0.161  | 0.181  | 1.59 | 0.36 | 1.69 | 0.38 |
| META1_4403 | 50S ribosomal subunit protein L10                         | 1.830 | 1.654 | 1.386 | 2.705  | 2.874  | 2.457  | 2.228  | 2.242  | 3.116  | 1.597 | 2.671  | 2.534  | 2.14 | 0.03 | 1.42 | 0.60 |
| META1_4404 | 50S ribosomal subunit protein L7/L12                      | 1.480 | 1.767 | 2.450 | 3.855  | 2.304  | 3.048  | 0.964  | 1.856  | 2.044  | 1.950 | 2.853  | 1.640  | 1.13 | 0.54 | 0.86 | 0.08 |
| META1_4405 | RNA polymerase, beta subunit                              | 7.865 | 9.02  | 9.427 | 17.787 | 13.302 | 12.168 | 10.519 | 10.593 | 11.591 | 8.500 | 13.486 | 10.907 | 1.32 | 0.18 | 1.21 | 0.09 |
| META1_4406 | RNA polymerase, beta prime subunit                        | 6.697 | 8.361 | 9.452 | 16.773 | 11.425 | 11.199 | 10.155 | 9.549  | 10.182 | 8.373 | 12.126 | 9.953  | 1.60 | 0.11 | 1.23 | 0.12 |
| META1_4408 | putrescine transporter subunit; periplasmic-binding co    | 0.117 | 0.181 | 0.124 | 0.135  | 0.166  | 0.165  | 0.129  | 0.077  | 0.060  | 0.145 | 0.161  | 0.087  | 0.81 | 0.13 | 0.81 | 0.06 |
| META1_4409 | conserved protein of unknown function                     | 0.000 | 0.136 | 0.124 | 0.000  | 0.048  | 0.000  | 0.000  | 0.058  | 0.099  | 0.100 | 0.020  | 0.054  | 0.73 | 0.94 | 4.00 | 0.55 |
| META1_4411 | conserved protein of unknown function                     | 0.000 | 0.068 | 0.074 | 0.000  | 0.000  | 0.000  | 0.086  | 0.116  | 0.060  | 0.054 | 0.000  | 0.087  | 2.17 | 0.40 | n.d. | 0.00 |
| META1_4413 | conserved protein of unknown function                     | 0.000 | 0.045 | 0.099 | 0.000  | 0.000  | 0.000  | 0.000  | 0.000  | 0.040  | 0.054 | 0.000  | 0.013  | 0.33 | 0.55 | n.d. | 0.37 |
| META1_4414 | putative glutathione S-transferase                        | 0.156 | 0.091 | 0.074 | 0.135  | 0.190  | 0.118  | 0.171  | 0.213  | 0.099  | 0.100 | 0.151  | 0.161  | 2.18 | 0.26 | 1.60 | 0.84 |
| META1_4416 | polynucleotide phosphorylase/polyadenylase                | 5.529 | 4.917 | 5.196 | 7.169  | 6.057  | 6.734  | 5.442  | 4.639  | 4.942  | 5.162 | 6.511  | 4.993  | 1.31 | 0.51 | 1.15 | 0.01 |
| META1_4417 | 30S ribosomal subunit protein S15                         | 0.312 | 0.272 | 0.544 | 0.473  | 0.570  | 0.543  | 0.471  | 0.406  | 0.536  | 0.381 | 0.544  | 0.470  | 1.67 | 0.31 | 1.30 | 0.29 |
| META1_4420 | Exodeoxyribonuclease III (Exonuclease III) (EXO III) (AP  | 0.000 | 0.000 | 0.000 | 0.000  | 0.000  | 0.000  | 0.086  | 0.058  | 0.040  | 0.000 | 0.000  | 0.060  | n.d. | 0.00 | n.d. | 0.00 |
| META1_4421 | putative activator of phototigment and puc with BLUF      | 0.000 | 0.000 | 0.000 | 0.000  | 0.000  | 0.000  | 0.043  | 0.000  | 0.040  | 0.000 | 0.000  | 0.027  | n.d. | 0.12 | n.d. | 0.12 |
| META1_4423 | conserved protein of unknown function; putative export    | 0.000 | 0.091 | 0.099 | 0.135  | 0.428  | 0.307  | 0.193  | 0.174  | 0.218  | 0.073 | 0.333  | 0.195  | 3.63 | 0.49 | 0.88 | 0.44 |
| META1_4424 | Cell division protein                                     | 0.000 | 0.204 | 0.223 | 0.000  | 0.641  | 0.473  | 0.386  | 0.425  | 0.456  | 0.163 | 0.474  | 0.423  | 3.50 | 0.49 | 1.34 | 0.33 |
| META1_4425 | NAD(+)-synthase (glutamine-hydrolyzing) with a nitrilas   | 0.389 | 0.363 | 0.594 | 0.338  | 0.261  | 0.077  | 0.407  | 0.503  | 0.451  | 0.454 | 0.242  | 0.457  | 1.36 | 0.62 | 0.83 | 0.07 |
| META1_4428 | putative transport transmembrane protein, AmpG            | 0.000 | 0.091 | 0.099 | 0.000  | 0.071  | 0.000  | 0.043  | 0.039  | 0.040  | 0.073 | 0.030  | 0.040  | 0.75 | 0.27 | 2.00 | 0.09 |
| META1_4429 | conserved protein of unknown function                     | 0.156 | 0.045 | 0.099 | 0.000  | 0.095  | 0.047  | 0.214  | 0.155  | 0.119  | 0.091 | 0.060  | 0.161  | 2.40 | 0.22 | 4.00 | 0.51 |
| META1_4432 | protein of unknown function                               | 0.273 | 0.249 | 0.124 | 0.473  | 0.356  | 0.425  | 0.493  | 0.290  | 0.258  | 0.209 | 0.403  | 0.343  | 2.22 | 0.20 | 1.28 | 0.36 |
| META1_4433 | GTP-binding protein EngA, GTPase                          | 0.000 | 0.249 | 0.198 | 0.135  | 0.404  | 0.354  | 0.279  | 0.135  | 0.198  | 0.172 | 0.343  | 0.202  | 1.58 | 0.36 | 0.88 | 0.48 |
| META1_4435 | conserved protein of unknown function; putative carbo     | 0.000 | 0.068 | 0.099 | 0.000  | 0.000  | 0.000  | 0.000  | 0.000  | 0.000  | 0.064 | 0.000  | 0.000  | 0.00 | 0.12 | n.d. | n.d. |
| META1_4436 | Formamidopyrimidine-DNA glycosylase (Fapy-DNA glyco       | 0.000 | 0.000 | 0.000 | 0.000  | 0.000  | 0.000  | 0.000  | 0.039  | 0.000  | 0.000 | 0.000  | 0.013  | n.d. | 0.37 | n.d. | 0.37 |
| META1_4441 | putative hybrid histidine kinase with multiple PAS and a  | 0.078 | 0.227 | 0.247 | 0.812  | 0.309  | 0.354  | 0.471  | 0.387  | 0.238  | 0.200 | 0.403  | 0.363  | 2.45 | 0.14 | 1.35 | 0.55 |
| META1_4442 | putative glutathione S-transferase                        | 0.000 | 0.045 | 0.000 | 0.000  | 0.000  | 0.000  | 0.000  | 0.000  | 0.000  | 0.018 | 0.000  | 0.000  | 0.00 | 0.37 | n.d. | n.d. |
| META1_4443 | conserved protein of unknown function                     | 0.000 | 0.204 | 0.124 | 0.000  | 0.000  | 0.000  | 0.064  | 0.039  | 0.079  | 0.127 | 0.000  | 0.060  | 0.64 | 0.25 | n.d. | 0.00 |
| META1_4445 | UvrABC system protein B (UvrB protein) (Excinuclease A    | 0.000 | 0.136 | 0.148 | 0.000  | 0.404  | 0.142  | 0.279  | 0.387  | 0.357  | 0.109 | 0.232  | 0.343  | 4.25 | 0.52 | 2.22 | 0.43 |
| META1_4453 | conserved protein of unknown function, ankryrin repeat    | 0     |       |       |        |        |        |        |        |        |       |        |        |      |      |      |      |

|            |                                                           |       |       |       |       |       |       |       |       |       |       |       |       |       |      |      |      |
|------------|-----------------------------------------------------------|-------|-------|-------|-------|-------|-------|-------|-------|-------|-------|-------|-------|-------|------|------|------|
| META1_4551 | conserved protein of unknown function                     | 0.000 | 0.000 | 0.000 | 0.000 | 0.048 | 0.000 | 0.064 | 0.000 | 0.079 | 0.000 | 0.020 | 0.047 | n.d.  | 0.12 | 3.50 | 0.54 |
| META1_4552 | transcription repair coupling protein, ATP-dependent h    | 0.273 | 0.589 | 0.841 | 1.014 | 1.544 | 1.016 | 1.157 | 1.218 | 1.270 | 0.608 | 1.240 | 1.216 | 2.70  | 0.06 | 1.47 | 0.80 |
| META1_4553 | DNA-binding transcriptional repressor                     | 0.000 | 0.000 | 0.000 | 0.271 | 0.000 | 0.000 | 0.000 | 0.000 | 0.040 | 0.000 | 0.040 | 0.013 | n.d.  | 0.37 | 0.50 | 0.89 |
| META1_4554 | conserved protein of unknown function                     | 0.000 | 0.000 | 0.000 | 0.000 | 0.000 | 0.000 | 0.043 | 0.039 | 0.079 | 0.000 | 0.000 | 0.054 | n.d.  | 0.00 | n.d. | 0.00 |
| META1_4557 | protein of unknown function                               | 0.000 | 0.000 | 0.000 | 0.000 | 0.000 | 0.071 | 0.043 | 0.077 | 0.040 | 0.000 | 0.060 | 0.054 | n.d.  | 0.07 | 1.33 | 0.33 |
| META1_4560 | protein of unknown function                               | 0.000 | 0.045 | 0.000 | 0.000 | 0.000 | 0.000 | 0.000 | 0.000 | 0.000 | 0.018 | 0.000 | 0.000 | 0.000 | 0.37 | n.d. | n.d. |
| META1_4561 | putative AMP-dependent synthetase/acyl-CoA ligase         | 0.000 | 0.091 | 0.000 | 0.000 | 0.000 | 0.000 | 0.086 | 0.174 | 0.179 | 0.036 | 0.000 | 0.148 | 0.50  | 0.14 | n.d. | 0.00 |
| META1_4562 | protein of unknown function                               | 0.156 | 0.159 | 0.247 | 0.000 | 0.095 | 0.118 | 0.086 | 0.097 | 0.159 | 0.191 | 0.091 | 0.114 | 0.81  | 0.10 | 1.89 | 0.38 |
| META1_4564 | glycosyl transferase                                      | 0.000 | 0.045 | 0.049 | 0.000 | 0.000 | 0.047 | 0.000 | 0.039 | 0.060 | 0.036 | 0.020 | 0.034 | 1.25  | 1.00 | 2.50 | 0.52 |
| META1_4565 | conserved protein of unknown function; putative Lipid     | 0.000 | 0.045 | 0.000 | 0.000 | 0.000 | 0.000 | 0.000 | 0.000 | 0.000 | 0.018 | 0.000 | 0.000 | 0.00  | 0.37 | n.d. | n.d. |
| META1_4567 | putative flavin-binding monooxygenase                     | 0.000 | 0.000 | 0.000 | 0.000 | 0.000 | 0.000 | 0.064 | 0.039 | 0.079 | 0.000 | 0.000 | 0.060 | n.d.  | 0.00 | n.d. | 0.00 |
| META1_4568 | putative Acetyl-hydrolase                                 | 0.000 | 0.068 | 0.049 | 0.000 | 0.048 | 0.047 | 0.107 | 0.193 | 0.099 | 0.045 | 0.040 | 0.134 | 4.00  | 0.49 | 5.00 | 0.52 |
| META1_4569 | Short-chain dehydrogenase/reductase SDR ; putative e      | 0.000 | 0.091 | 0.074 | 0.000 | 0.095 | 0.047 | 0.086 | 0.193 | 0.139 | 0.064 | 0.060 | 0.141 | 3.00  | 0.45 | 3.50 | 0.48 |
| META1_4570 | conserved protein of unknown function                     | 0.000 | 0.045 | 0.148 | 0.000 | 0.071 | 0.095 | 0.171 | 0.174 | 0.179 | 0.073 | 0.071 | 0.175 | 3.25  | 0.49 | 3.71 | 0.49 |
| META1_4576 | putative metal-dependent hydrolase                        | 0.117 | 0.181 | 0.099 | 0.135 | 0.000 | 0.047 | 0.193 | 0.251 | 0.139 | 0.136 | 0.040 | 0.195 | 1.93  | 0.19 | 7.25 | 0.51 |
| META1_4577 | putative metallo-dependent hydrolase, putative deoxyn     | 0.117 | 0.227 | 0.148 | 0.676 | 0.238 | 0.331 | 0.179 | 0.135 | 0.179 | 0.172 | 0.343 | 0.168 | 1.32  | 0.81 | 0.74 | 0.07 |
| META1_4578 | methionyl-tRNA synthetase                                 | 0.545 | 0.838 | 0.990 | 0.406 | 0.689 | 0.591 | 0.728 | 0.870 | 0.754 | 0.826 | 0.805 | 0.786 | 1.29  | 0.93 | 1.95 | 0.10 |
| META1_4579 | protein of unknown function; putative exported protein    | 0.000 | 0.000 | 0.000 | 0.000 | 0.000 | 0.000 | 0.150 | 0.116 | 0.179 | 0.000 | 0.000 | 0.148 | n.d.  | 0.00 | n.d. | 0.00 |
| META1_4581 | DNA polymerase III, delta prime subunit                   | 0.000 | 0.068 | 0.099 | 0.000 | 0.071 | 0.071 | 0.043 | 0.000 | 0.000 | 0.064 | 0.060 | 0.013 | 0.29  | 0.56 | 0.33 | 0.55 |
| META1_4582 | thymidylate kinase                                        | 0.000 | 0.000 | 0.000 | 0.000 | 0.000 | 0.000 | 0.043 | 0.077 | 0.079 | 0.000 | 0.000 | 0.067 | n.d.  | 0.00 | n.d. | 0.00 |
| META1_4585 | putrescine transporter, ATP-binding component of ABC      | 0.000 | 0.068 | 0.074 | 0.000 | 0.119 | 0.165 | 0.043 | 0.058 | 0.060 | 0.054 | 0.121 | 0.054 | 1.33  | 0.34 | 0.67 | 0.25 |
| META1_4590 | protein of unknown function                               | 0.000 | 0.091 | 0.074 | 0.000 | 0.190 | 0.213 | 0.150 | 0.155 | 0.119 | 0.064 | 0.171 | 0.141 | 3.00  | 0.45 | 1.24 | 0.32 |
| META1_4593 | putative transcriptional regulator, GntR family           | 0.000 | 0.091 | 0.000 | 0.000 | 0.000 | 0.071 | 0.107 | 0.097 | 0.159 | 0.036 | 0.030 | 0.121 | 4.00  | 0.13 | 6.00 | 0.14 |
| META1_4594 | hydroxypyruvate isomerase                                 | 0.000 | 0.068 | 0.000 | 0.000 | 0.000 | 0.000 | 0.043 | 0.000 | 0.099 | 0.027 | 0.000 | 0.047 | 2.33  | 0.52 | n.d. | 0.12 |
| META1_4595 | putative glucose dehydrogenase, NAD(P)-binding doma       | 0.506 | 0.612 | 0.421 | 0.000 | 0.000 | 0.165 | 0.214 | 0.135 | 0.218 | 0.517 | 0.071 | 0.188 | 0.49  | 0.01 | 4.00 | 0.12 |
| META1_4596 | putative D-lactate dehydrogenase (cytochrome)             | 0.000 | 0.068 | 0.074 | 0.000 | 0.000 | 0.000 | 0.386 | 0.387 | 0.258 | 0.054 | 0.000 | 0.343 | 8.50  | 0.64 | n.d. | 0.00 |
| META1_4598 | succinate-semialdehyde dehydrogenase I, NADP-depen        | 1.246 | 1.563 | 1.287 | 0.609 | 0.784 | 0.945 | 0.771 | 0.793 | 1.012 | 1.388 | 0.827 | 0.860 | 0.84  | 0.01 | 1.56 | 0.53 |
| META1_4599 | protein of unknown function                               | 0.000 | 0.000 | 0.000 | 0.541 | 0.000 | 0.118 | 0.000 | 0.193 | 0.000 | 0.000 | 0.131 | 0.067 | n.d.  | 0.37 | 0.77 | 0.54 |
| META1_4603 | putative flagellar motor switch protein Flin              | 0.000 | 0.000 | 0.000 | 0.000 | 0.071 | 0.000 | 0.000 | 0.000 | 0.000 | 0.000 | 0.030 | 0.000 | n.d.  | n.d. | 0.00 | 0.37 |
| META1_4604 | Lipoyltransferase [Lipoyl-[acyl-carrier protein]-protein- | 0.000 | 0.040 | 0.049 | 0.000 | 0.095 | 0.142 | 0.150 | 0.116 | 0.179 | 0.018 | 0.101 | 0.148 | 11.00 | 0.17 | 2.20 | 0.41 |
| META1_4605 | putative glycosyl transferase                             | 0.000 | 0.000 | 0.000 | 0.000 | 0.000 | 0.000 | 0.150 | 0.039 | 0.099 | 0.000 | 0.000 | 0.094 | n.d.  | 0.00 | n.d. | 0.00 |
| META1_4608 | putative response regulator receiver                      | 0.000 | 0.091 | 0.000 | 0.000 | 0.000 | 0.000 | 0.043 | 0.000 | 0.099 | 0.036 | 0.000 | 0.047 | 1.75  | 0.50 | n.d. | 0.12 |
| META1_4610 | putative hybrid histidine kinase; Domains: two PAS, two   | 0.000 | 0.204 | 0.173 | 0.000 | 0.166 | 0.142 | 0.257 | 0.174 | 0.060 | 0.145 | 0.131 | 0.161 | 1.50  | 0.34 | 1.85 | 0.36 |
| META1_4613 | two-component response regulator                          | 0.078 | 0.113 | 0.223 | 0.000 | 0.000 | 0.000 | 0.193 | 0.155 | 0.099 | 0.145 | 0.050 | 0.148 | 1.38  | 0.73 | 4.40 | 0.13 |
| META1_4614 | putative GCN5-related N-acetyltransferase                 | 0.000 | 0.000 | 0.000 | 0.000 | 0.000 | 0.000 | 0.000 | 0.058 | 0.040 | 0.000 | 0.000 | 0.034 | n.d.  | 0.12 | n.d. | 0.12 |
| META1_4615 | conserved protein of unknown function; putative mem       | 0.000 | 0.000 | 0.000 | 0.000 | 0.000 | 0.000 | 0.000 | 0.077 | 0.060 | 0.000 | 0.000 | 0.047 | n.d.  | 0.12 | n.d. | 0.12 |
| META1_4616 | glycolate permease (LctP family)                          | 0.000 | 0.159 | 0.074 | 0.000 | 0.048 | 0.095 | 0.150 | 0.193 | 0.218 | 0.091 | 0.060 | 0.188 | 2.80  | 0.46 | 4.67 | 0.53 |
| META1_4617 | Manganese catalase                                        | 0.000 | 0.272 | 0.000 | 0.000 | 0.000 | 0.000 | 0.000 | 0.000 | 0.000 | 0.109 | 0.000 | 0.000 | 0.00  | 0.37 | n.d. | n.d. |
| META1_4618 | terpenoid synthase, putative phytoene synthase            | 0.195 | 0.091 | 0.099 | 0.203 | 0.000 | 0.142 | 0.407 | 0.483 | 0.318 | 0.118 | 0.091 | 0.403 | 4.62  | 0.01 | 6.67 | 0.52 |
| META1_4619 | conserved protein of unknown function                     | 0.000 | 0.068 | 0.124 | 0.000 | 0.095 | 0.071 | 0.150 | 0.193 | 0.278 | 0.073 | 0.071 | 0.208 | 3.88  | 0.50 | 4.43 | 0.51 |
| META1_4620 | putative protein-export membrane protein, SecD/SecE       | 0.195 | 0.181 | 0.173 | 0.338 | 0.190 | 0.165 | 0.343 | 0.271 | 0.258 | 0.181 | 0.202 | 0.289 | 2.15  | 0.01 | 2.15 | 0.32 |
| META1_4621 | putative protein-export membrane protein, SecD/SecE       | 0.896 | 1.088 | 0.990 | 0.271 | 1.211 | 1.087 | 1.500 | 1.121 | 1.151 | 1.007 | 1.018 | 1.250 | 1.68  | 0.10 | 1.84 | 0.31 |
| META1_4622 | putative phospholipase, auxiliary membrane component      | 0.234 | 0.227 | 0.346 | 0.473 | 0.356 | 0.213 | 0.236 | 0.232 | 0.496 | 0.272 | 0.312 | 0.323 | 1.60  | 0.67 | 1.55 | 0.80 |
| META1_4623 | conserved protein of unknown function, ATPase family      | 0.234 | 0.272 | 0.272 | 0.609 | 0.641 | 0.614 | 0.471 | 0.464 | 0.357 | 0.263 | 0.625 | 0.430 | 2.21  | 0.01 | 1.03 | 0.01 |
| META1_4624 | putative protein precursor, N-terminal membrane lipop     | 0.000 | 0.000 | 0.000 | 0.000 | 0.047 | 0.000 | 0.064 | 0.058 | 0.000 | 0.000 | 0.020 | 0.040 | n.d.  | 0.12 | 3.00 | 0.53 |
| META1_4626 | 5'-nucleotidase surE (Nucleoside 5'-monophosphate ph      | 0.467 | 0.408 | 0.297 | 0.406 | 0.238 | 0.354 | 0.214 | 0.348 | 0.238 | 0.381 | 0.312 | 0.269 | 0.95  | 0.12 | 1.29 | 0.37 |
| META1_4627 | serine tRNA synthetase; also charges selocystein tRN      | 0.701 | 0.612 | 0.569 | 0.609 | 1.140 | 0.662 | 0.557 | 0.619 | 0.635 | 0.617 | 0.857 | 0.605 | 1.32  | 0.64 | 1.06 | 0.29 |
| META1_4630 | putative transcriptional regulator, MarR family           | 0.000 | 0.181 | 0.124 | 0.338 | 0.261 | 0.165 | 0.364 | 0.348 | 0.318 | 0.118 | 0.232 | 0.343 | 3.92  | 0.51 | 2.22 | 0.19 |
| META1_4632 | putative enoyl-CoA hydratase/isomerase family protein     | 0.234 | 0.136 | 0.148 | 0.000 | 0.380 | 0.402 | 0.171 | 0.193 | 0.099 | 0.163 | 0.333 | 0.155 | 1.28  | 0.67 | 0.70 | 0.24 |
| META1_4633 | porphobilinogen synthase                                  | 0.428 | 0.521 | 0.322 | 0.203 | 0.475 | 0.520 | 0.386 | 0.387 | 0.337 | 0.426 | 0.454 | 0.370 | 1.17  | 0.47 | 1.22 | 1.00 |
| META1_4635 | protein of unknown function; putative membrane prote      | 0.000 | 0.000 | 0.000 | 0.000 | 0.048 | 0.000 | 0.000 | 0.000 | 0.119 | 0.000 | 0.020 | 0.040 | n.d.  | 0.37 | 3.00 | 0.95 |
| META1_4638 | conserved protein of unknown function, putative trans     | 0.000 | 0.159 | 0.148 | 0.000 | 0.071 | 0.142 | 0.000 | 0.000 | 0.139 | 0.118 | 0.091 | 0.047 | 0.54  | 0.53 | 0.78 | 0.50 |
| META1_4639 | maltose o-acetyltransferase                               | 0.078 | 0.068 | 0.074 | 0.000 | 0.048 | 0.000 | 0.064 | 0.077 | 0.060 | 0.073 | 0.020 | 0.067 | 1.25  | 0.34 | 5.00 | 0.13 |
| META1_4640 | conserved protein of unknown function                     | 0.467 | 0.249 | 0.223 | 0.000 | 0.000 | 0.142 | 0.064 | 0.174 | 0.139 | 0.290 | 0.060 | 0.128 | 0.59  | 0.07 | 3.17 | 0.11 |
| META1_4641 | putative phage DNA polymerase                             | 0.000 | 0.000 | 0.000 | 0.000 | 0.000 | 0.047 | 0.000 | 0.000 | 0.000 | 0.000 | 0.020 | 0.000 | n.d.  | n.d. | 0.00 | 0.37 |
| META1_4642 | electron transfer flavoprotein ubiquinone oxidoreducta    | 0.623 | 0.884 | 0.792 | 0.676 | 1.259 | 0.709 | 0.707 | 0.599 | 0.793 | 0.789 | 0.937 | 0.599 | 1.20  | 0.67 | 1.12 | 0.42 |
| META1_4646 | conserved protein of unknown function                     | 0.000 | 0.000 | 0.049 | 0.000 | 0.000 | 0.000 | 0.000 | 0.000 | 0.000 | 0.018 | 0.000 | 0.000 | 0.00  | 0.37 | n.d. | n.d. |
| META1_4647 | cystathionine beta-lyase, PLP-dependent (beta-cystatin    | 0.000 | 0.000 | 0.099 | 0.135 | 0.214 | 0.165 | 0.150 | 0.155 | 0.198 | 0.036 | 0.181 | 0.168 | 6.25  | 0.14 | 1.39 | 0.94 |
| META1_4648 | putative zinc-containing alcohol dehydrogenase            | 0.000 | 0.068 | 0.000 | 0.000 | 0.000 | 0.000 | 0.000 | 0.000 | 0.000 | 0.027 | 0.000 | 0.000 | 0.00  | 0.37 | n.d. | n.d. |
| META1_4653 | putative sensor hybrid histidine kinase with multiple PA  | 0.000 | 0.159 | 0.148 | 0.000 | 0.166 | 0.047 | 0.107 | 0.155 | 0.198 | 0.118 | 0.091 | 0.155 | 1.77  | 0.37 | 2.56 | 0.45 |
| META1_4654 | putative glycosyl transferase, family 2                   | 0.000 | 0.000 | 0.000 | 0.000 | 0.000 | 0.047 | 0.000 | 0.000 | 0.040 | 0.000 | 0.020 | 0.013 | n.d.  | 0.37 | 1.00 | 0.99 |
| META1_4658 | small heat shock protein                                  | 0.000 | 0.000 | 0.000 | 0.000 | 0.000 | 0.000 | 0.043 | 0.000 | 0.000 | 0.000 | 0.000 | 0.013 | n.d.  | 0.37 | n.d. | 0.37 |
| META1_4660 | DNA mismatch repair protein mutL                          | 0.000 | 0.000 | 0.000 | 0.000 | 0.095 | 0.095 | 0.064 | 0.077 | 0.000 | 0.000 | 0.081 | 0.047 | n.d.  | 0.12 | 0.88 | 0.97 |
| META1_4661 | putative Short-chain specific acyl-CoA dehydrogenase      | 0.312 | 0.272 | 0.247 | 0.000 | 0.000 | 0.071 | 0.064 | 0.039 | 0.119 | 0.272 | 0.030 | 0.074 | 0.37  | 0.01 | 3.67 | 0.11 |
| META1_4662 | putative ATP-binding protein with two ATPase domains      | 0.000 | 0.091 | 0.173 | 0.203 | 0.285 | 0.095 | 0.236 | 0.329 | 0.159 | 0.100 | 0.192 | 0.242 | 3.27  | 0.47 | 1.89 | 0.55 |
| META1_4664 | Alpha/beta hydrolase related                              | 0.078 | 0.227 | 0.099 | 0.000 | 0.119 | 0.047 | 0.150 | 0.135 | 0.159 | 0.145 | 0.071 | 0.148 | 1.38  | 0.57 | 3.14 | 0.48 |
| META1_4665 | putative deaminase reductase domain-containing prote      | 0.156 | 0.181 | 0.223 | 0.000 | 0.000 | 0.000 | 0.107 | 0.097 | 0.1   |       |       |       |       |      |      |      |

|            |                                                                    |       |       |       |       |       |       |       |       |       |       |       |       |       |      |       |      |
|------------|--------------------------------------------------------------------|-------|-------|-------|-------|-------|-------|-------|-------|-------|-------|-------|-------|-------|------|-------|------|
| META1_4799 | putative glycerate dehydrogenase (gyar-like)                       | 0.000 | 0.068 | 0.074 | 0.000 | 0.166 | 0.118 | 0.150 | 0.135 | 0.119 | 0.054 | 0.121 | 0.134 | 3.33  | 0.47 | 1.67  | 0.37 |
| META1_4800 | 3-isopropylmalate isomerase, subunit with LeuD                     | 0.000 | 0.181 | 0.223 | 0.203 | 1.021 | 0.685 | 0.493 | 0.425 | 0.456 | 0.154 | 0.756 | 0.457 | 4.00  | 0.52 | 0.91  | 0.80 |
| META1_4805 | putative transcriptional regulator, TetR family                    | 0.000 | 0.000 | 0.000 | 0.000 | 0.071 | 0.047 | 0.086 | 0.097 | 0.079 | 0.000 | 0.050 | 0.087 | n.d.  | 0.00 | 2.60  | 0.43 |
| META1_4808 | transcriptional regulator, TetR family                             | 0.000 | 0.000 | 0.000 | 0.000 | 0.000 | 0.047 | 0.107 | 0.135 | 0.079 | 0.000 | 0.020 | 0.108 | n.d.  | 0.00 | 8.00  | 0.15 |
| META1_4809 | conserved protein of unknown function; putative protease           | 0.000 | 0.000 | 0.000 | 0.000 | 0.119 | 0.142 | 0.129 | 0.116 | 0.119 | 0.036 | 0.111 | 0.121 | 4.50  | 0.13 | 1.64  | 0.36 |
| META1_4811 | Putative Zn-dependent protease                                     | 0.000 | 0.000 | 0.000 | 0.000 | 0.071 | 0.000 | 0.000 | 0.000 | 0.000 | n.d.  | n.d.  | 0.000 | n.d.  | n.d. | 0.00  | 0.37 |
| META1_4813 | Putative cyclic nucleotide-regulated FAD-dependent pyrophosphatase | 0.000 | 0.113 | 0.074 | 0.000 | 0.119 | 0.000 | 0.064 | 0.039 | 0.079 | 0.073 | 0.050 | 0.060 | 1.13  | 0.32 | 1.80  | 0.09 |
| META1_4819 | conserved protein of unknown function                              | 0.467 | 0.181 | 0.074 | 0.406 | 0.095 | 0.118 | 0.043 | 0.058 | 0.119 | 0.209 | 0.151 | 0.074 | 0.488 | 0.17 | 0.73  | 0.17 |
| META1_4820 | putative ABC transporter, periplasmic protein; putative            | 0.312 | 0.317 | 0.272 | 0.812 | 0.071 | 0.331 | 0.364 | 0.464 | 0.456 | 0.299 | 0.292 | 0.430 | 1.94  | 0.02 | 2.21  | 0.55 |
| META1_4821 | Putative aliphatic sulfonates transport permease protein           | 0.000 | 0.000 | 0.000 | 0.135 | 0.190 | 0.118 | 0.086 | 0.077 | 0.099 | 0.000 | 0.151 | 0.087 | n.d.  | 0.00 | 0.87  | 0.03 |
| META1_4822 | alkanesulfonate transporter subunit; ATP-binding component         | 0.000 | 0.068 | 0.000 | 0.203 | 0.000 | 0.260 | 0.171 | 0.116 | 0.139 | 0.027 | 0.141 | 0.141 | 7.00  | 0.15 | 1.50  | 0.31 |
| META1_4823 | conserved protein of unknown function                              | 0.000 | 0.113 | 0.173 | 0.203 | 0.095 | 0.095 | 0.107 | 0.097 | 0.079 | 0.109 | 0.111 | 0.094 | 1.17  | 0.32 | 1.27  | 0.38 |
| META1_4825 | peptide chain release factor RF-3; GTP-binding factor              | 0.000 | 0.227 | 0.148 | 0.000 | 0.428 | 0.165 | 0.193 | 0.251 | 0.278 | 0.145 | 0.252 | 0.242 | 2.25  | 0.42 | 1.44  | 0.36 |
| META1_4828 | conserved protein of unknown function                              | 0.000 | 0.045 | 0.000 | 0.000 | 0.000 | 0.000 | 0.000 | 0.000 | 0.000 | 0.018 | 0.000 | 0.000 | 0.00  | 0.37 | n.d.  | n.d. |
| META1_4834 | conserved protein of unknown function; putative ATP-dependent      | 1.635 | 2.062 | 2.351 | 1.623 | 1.900 | 1.843 | 2.121 | 1.817 | 1.806 | 2.068 | 1.834 | 1.909 | 1.25  | 0.73 | 1.56  | 0.40 |
| META1_4837 | conserved protein of unknown function; putative export             | 0.000 | 0.000 | 0.000 | 0.000 | 0.000 | 0.000 | 0.064 | 0.000 | 0.079 | 0.000 | 0.000 | 0.047 | n.d.  | 0.12 | n.d.  | 0.12 |
| META1_4838 | conserved protein of unknown function                              | 0.000 | 0.000 | 0.000 | 0.000 | 0.000 | 0.000 | 0.064 | 0.000 | 0.040 | 0.000 | 0.000 | 0.034 | n.d.  | 0.12 | n.d.  | 0.12 |
| META1_4840 | putative Glucokinase (Glucose kinase)                              | 0.428 | 0.363 | 0.173 | 0.135 | 0.285 | 0.213 | 0.364 | 0.290 | 0.258 | 0.308 | 0.232 | 0.302 | 1.32  | 0.99 | 1.96  | 0.17 |
| META1_4841 | putative trehalose-6-phosphate phosphatase (otsB)                  | 0.078 | 0.113 | 0.099 | 0.271 | 0.000 | 0.071 | 0.129 | 0.039 | 0.139 | 0.100 | 0.071 | 0.101 | 1.36  | 0.86 | 2.14  | 0.32 |
| META1_4842 | conserved protein of unknown function                              | 0.000 | 0.000 | 0.000 | 0.000 | 0.048 | 0.000 | 0.086 | 0.058 | 0.000 | 0.000 | 0.020 | 0.047 | n.d.  | 0.12 | 3.50  | 0.54 |
| META1_4843 | Beta-lactamase                                                     | 0.117 | 0.159 | 0.297 | 0.271 | 0.261 | 0.354 | 0.193 | 0.135 | 0.298 | 0.200 | 0.302 | 0.208 | 1.41  | 0.76 | 1.03  | 0.19 |
| META1_4846 | NAD-dependent formate dehydrogenase, Molybdenum                    | 0.000 | 0.000 | 0.000 | 0.000 | 0.119 | 0.000 | 0.386 | 0.329 | 0.357 | 0.000 | 0.050 | 0.356 | n.d.  | 0.00 | 10.60 | 0.18 |
| META1_4847 | NAD-dependent formate dehydrogenase, Molybdenum                    | 0.000 | 0.000 | 0.000 | 0.338 | 0.950 | 1.087 | 3.278 | 2.803 | 2.719 | 0.000 | 0.917 | 2.923 | n.d.  | 0.00 | 4.78  | 0.02 |
| META1_4848 | NAD-dependent formate dehydrogenase, molybdenum                    | 0.000 | 0.000 | 0.000 | 1.014 | 1.876 | 1.229 | 4.285 | 4.813 | 4.366 | 0.000 | 1.472 | 4.496 | n.d.  | 0.00 | 4.58  | 0.00 |
| META1_4849 | NAD-linked formate dehydrogenase, Molybdenum component             | 0.000 | 0.000 | 0.000 | 0.000 | 0.238 | 0.354 | 0.471 | 0.290 | 0.516 | 0.000 | 0.252 | 0.423 | n.d.  | 0.00 | 2.52  | 0.43 |
| META1_4850 | transcriptional regulator, LysR family                             | 0.000 | 0.000 | 0.000 | 0.000 | 0.000 | 0.000 | 0.107 | 0.077 | 0.060 | 0.000 | 0.000 | 0.081 | n.d.  | 0.00 | n.d.  | 0.00 |
| META1_4851 | protein of unknown function; putative exported protein             | 0.000 | 0.068 | 0.000 | 0.000 | 0.000 | 0.000 | 0.000 | 0.000 | 0.000 | 0.027 | 0.000 | 0.000 | 0.00  | 0.37 | n.d.  | n.d. |
| META1_4852 | small GTP-binding protein, putative GTPase                         | 0.195 | 0.204 | 0.124 | 0.135 | 0.641 | 0.662 | 0.300 | 0.367 | 0.218 | 0.172 | 0.575 | 0.296 | 2.32  | 0.07 | 0.77  | 0.62 |
| META1_4853 | protein of unknown function                                        | 0.000 | 0.000 | 0.000 | 0.000 | 0.048 | 0.000 | 0.000 | 0.039 | 0.000 | 0.000 | 0.020 | 0.013 | n.d.  | 0.37 | 1.00  | 0.99 |
| META1_4854 | putative acetyltransferase, putative N-acetylase of ribosomes      | 0.117 | 0.113 | 0.148 | 0.000 | 0.119 | 0.236 | 0.171 | 0.193 | 0.159 | 0.127 | 0.151 | 0.175 | 1.86  | 0.03 | 1.73  | 0.38 |
| META1_4855 | SOS ribosomal protein L27                                          | 0.584 | 0.476 | 0.569 | 0.541 | 1.689 | 1.016 | 0.814 | 0.580 | 0.834 | 0.535 | 0.806 | 0.739 | 1.86  | 0.09 | 1.38  | 0.98 |
| META1_4856 | SOS ribosomal protein L21                                          | 0.623 | 0.385 | 0.322 | 0.406 | 0.428 | 0.331 | 0.793 | 0.483 | 0.853 | 0.417 | 0.383 | 0.706 | 2.28  | 0.14 | 2.76  | 0.04 |
| META1_4857 | putative enzyme with nucleoside triphosphate hydrolase             | 0.000 | 0.317 | 0.371 | 0.000 | 0.238 | 0.284 | 0.321 | 0.174 | 0.238 | 0.263 | 0.222 | 0.242 | 1.24  | 0.32 | 1.64  | 0.36 |
| META1_4858 | conserved protein of unknown function; putative domain             | 0.467 | 0.295 | 0.396 | 0.676 | 0.641 | 0.449 | 0.107 | 0.348 | 0.397 | 0.372 | 0.564 | 0.289 | 1.05  | 0.38 | 0.77  | 0.12 |
| META1_4861 | conserved protein of unknown function                              | 0.117 | 0.000 | 0.000 | 0.000 | 0.000 | 0.000 | 0.107 | 0.000 | 0.060 | 0.027 | 0.000 | 0.054 | 2.67  | 0.49 | n.d.  | 0.12 |
| META1_4862 | protein of unknown function                                        | 0.000 | 0.000 | 0.000 | 0.000 | 0.000 | 0.000 | 0.000 | 0.000 | 0.040 | 0.000 | 0.000 | 0.013 | n.d.  | 0.37 | n.d.  | 0.37 |
| META1_4863 | Putative patatin-like phospholipase                                | 0.662 | 0.000 | 0.173 | 0.271 | 0.143 | 0.307 | 0.129 | 0.116 | 0.079 | 0.218 | 0.232 | 0.108 | 0.67  | 0.23 | 0.70  | 0.05 |
| META1_4865 | protein of unknown function                                        | 0.078 | 0.249 | 0.247 | 0.135 | 0.166 | 0.142 | 0.107 | 0.097 | 0.139 | 0.209 | 0.151 | 0.114 | 0.74  | 0.37 | 1.13  | 0.10 |
| META1_4866 | conserved protein of unknown function; putative export             | 0.000 | 0.068 | 0.000 | 0.000 | 0.000 | 0.000 | 0.000 | 0.000 | 0.000 | 0.027 | 0.000 | 0.000 | 0.00  | 0.37 | n.d.  | n.d. |
| META1_4868 | putative metallophosphatase/metallophosphoesterase                 | 0.000 | 0.091 | 0.000 | 0.000 | 0.000 | 0.000 | 0.064 | 0.039 | 0.040 | 0.036 | 0.000 | 0.047 | 1.75  | 0.09 | n.d.  | 0.00 |
| META1_4871 | putative PAS sensor hybrid histidine kinase                        | 0.000 | 0.000 | 0.000 | 0.000 | 0.000 | 0.000 | 0.043 | 0.039 | 0.079 | 0.000 | 0.000 | 0.054 | n.d.  | 0.00 | n.d.  | 0.00 |
| META1_4872 | putative Nucleoside triphosphatase; putative Tellurite             | 0.000 | 0.068 | 0.099 | 0.135 | 0.048 | 0.165 | 0.129 | 0.213 | 0.198 | 0.064 | 0.111 | 0.181 | 3.86  | 0.49 | 2.45  | 0.26 |
| META1_4873 | putative Nucleoside triphosphatase                                 | 0.108 | 0.149 | 0.148 | 0.211 | 0.149 | 0.189 | 0.107 | 0.174 | 0.099 | 0.172 | 0.151 | 0.138 | 0.97  | 0.18 | 1.36  | 0.88 |
| META1_4874 | conserved protein of unknown function                              | 0.350 | 0.498 | 0.445 | 0.203 | 0.546 | 0.165 | 0.407 | 0.387 | 0.456 | 0.445 | 0.333 | 0.417 | 1.27  | 0.83 | 1.88  | 0.29 |
| META1_4875 | putative histidine kinase, Putative HK, ATPase and Sens            | 0.078 | 0.295 | 0.223 | 0.271 | 0.428 | 0.236 | 0.300 | 0.271 | 0.337 | 0.218 | 0.323 | 0.302 | 1.88  | 0.24 | 1.41  | 1.00 |
| META1_4876 | S-adenosyl L-homocysteine hydrolase                                | 2.258 | 0.906 | 1.534 | 1.961 | 1.995 | 2.245 | 1.264 | 1.237 | 1.052 | 1.451 | 2.097 | 1.183 | 1.10  | 0.47 | 0.85  | 0.00 |
| META1_4877 | putative acetyl-coenzyme A synthetase (acsA-like)                  | 0.000 | 0.091 | 0.000 | 0.000 | 0.000 | 0.000 | 0.064 | 0.077 | 0.040 | 0.036 | 0.000 | 0.060 | 2.25  | 0.10 | n.d.  | 0.00 |
| META1_4878 | putative OXIDOREDUCTASE PROTEIN                                    | 0.779 | 0.340 | 0.445 | 0.676 | 0.238 | 0.142 | 0.386 | 0.406 | 0.456 | 0.481 | 0.262 | 0.417 | 1.17  | 0.54 | 2.38  | 0.46 |
| META1_4879 | enoyl-CoA hydratase                                                | 0.078 | 0.113 | 0.148 | 0.000 | 0.048 | 0.047 | 0.150 | 0.193 | 0.099 | 0.118 | 0.040 | 0.148 | 1.69  | 0.39 | 5.50  | 0.54 |
| META1_4881 | Cardiolipin synthase (cls-like)                                    | 0.000 | 0.000 | 0.000 | 0.000 | 0.048 | 0.071 | 0.086 | 0.077 | 0.079 | 0.000 | 0.050 | 0.081 | n.d.  | 0.00 | 2.40  | 0.42 |
| META1_4882 | conserved protein of unknown function                              | 0.000 | 0.000 | 0.000 | 0.000 | 0.095 | 0.000 | 0.000 | 0.000 | 0.000 | 0.000 | 0.040 | 0.000 | n.d.  | n.d. | 0.00  | 0.37 |
| META1_4883 | putative helicase-exonuclease type V protein family                | 0.000 | 0.000 | 0.000 | 0.000 | 0.071 | 0.000 | 0.043 | 0.039 | 0.079 | 0.000 | 0.030 | 0.054 | n.d.  | 0.00 | 2.67  | 0.10 |
| META1_4884 | PQQ-dependent aldol sugar dehydrogenase precursor                  | 2.142 | 1.246 | 1.089 | 0.947 | 0.570 | 0.743 | 0.279 | 0.387 | 0.635 | 1.397 | 0.585 | 0.437 | 0.42  | 0.02 | 1.12  | 0.24 |
| META1_4886 | thioredoxin                                                        | 0.623 | 0.453 | 0.594 | 0.541 | 0.333 | 0.520 | 0.493 | 0.503 | 0.456 | 0.544 | 0.443 | 0.484 | 1.20  | 0.27 | 1.64  | 0.71 |
| META1_4887 | putative 31 kDa outer-membrane immunogenic protein                 | 0.389 | 0.453 | 0.520 | 0.473 | 0.285 | 0.638 | 0.321 | 0.213 | 0.258 | 0.463 | 0.464 | 0.262 | 0.76  | 0.02 | 0.85  | 0.12 |
| META1_4888 | bifunctional folylpolyglutamate synthase and dihydrofolate         | 0.467 | 0.657 | 0.594 | 0.271 | 0.641 | 0.567 | 0.279 | 0.406 | 0.579 | 0.590 | 0.545 | 0.329 | 0.75  | 0.02 | 0.89  | 0.27 |
| META1_4889 | acetyl-CoA carboxylase, carboxyltransferase subunit beta           | 0.234 | 0.159 | 0.124 | 0.271 | 0.285 | 0.307 | 0.300 | 0.367 | 0.397 | 0.163 | 0.292 | 0.356 | 2.94  | 0.02 | 1.83  | 0.09 |
| META1_4890 | tryptophan synthase alpha subunit                                  | 0.701 | 0.566 | 0.742 | 1.082 | 0.380 | 0.638 | 0.450 | 0.657 | 0.635 | 0.662 | 0.595 | 0.585 | 1.19  | 0.36 | 1.47  | 0.75 |
| META1_4891 | Putative nucleotide pyrophosphatase                                | 0.000 | 0.045 | 0.000 | 0.000 | 0.048 | 0.000 | 0.086 | 0.077 | 0.040 | 0.018 | 0.020 | 0.067 | 5.00  | 0.13 | 5.00  | 0.13 |
| META1_4892 | Putative histidine triad (HIT) protein                             | 0.000 | 0.000 | 0.000 | 0.000 | 0.048 | 0.000 | 0.043 | 0.000 | 0.000 | 0.000 | 0.020 | 0.013 | n.d.  | 0.37 | 1.00  | 0.99 |
| META1_4893 | putative metal-dependent phosphohydrolase with a re                | 0.000 | 0.068 | 0.000 | 0.000 | 0.000 | 0.071 | 0.000 | 0.077 | 0.079 | 0.027 | 0.030 | 0.054 | 2.67  | 0.53 | 2.67  | 0.52 |
| META1_4894 | putative ATP-independent RNA helicase, DEAD/DEAH-B                 | 0.350 | 1.133 | 0.841 | 0.406 | 1.188 | 0.402 | 0.450 | 0.348 | 0.377 | 0.844 | 0.736 | 0.390 | 0.62  | 0.18 | 0.79  | 0.34 |
| META1_4896 | integral membrane sensor signal transduction histidine             | 0.000 | 0.000 | 0.000 | 0.000 | 0.048 | 0.000 | 0.064 | 0.039 | 0.040 | 0.000 | 0.020 | 0.047 | n.d.  | 0.00 | 3.50  | 0.12 |
| META1_4897 | two component transcriptional regulator                            | 0.662 | 0.884 | 0.569 | 0.676 | 0.546 | 0.756 | 0.643 | 1.063 | 0.635 | 0.717 | 0.655 | 0.786 | 1.48  | 0.70 | 1.80  | 0.49 |
| META1_4898 | putative transcriptional activator (TenA family)                   | 0.078 | 0.181 | 0.000 | 0.135 | 0.119 | 0.118 | 0.129 | 0.116 | 0.099 | 0.091 | 0.121 | 0.114 | 1.70  | 0.37 | 1.42  | 0.40 |
| META1_4899 | putative amino acid transporter                                    | 0.156 | 0.159 | 0.173 | 0.000 | 0.071 | 0.095 | 0.129 | 0.116 | 0.159 | 0.163 | 0.071 | 0.134 | 1.11  | 0.11 | 2.86  | 0.45 |
| META1_4905 | glutamine amidotransferase class II                                | 0.000 | 0.000 |       |       |       |       |       |       |       |       |       |       |       |      |       |      |

|            |                                                          |       |       |       |       |       |       |       |       |       |       |       |       |       |      |      |      |
|------------|----------------------------------------------------------|-------|-------|-------|-------|-------|-------|-------|-------|-------|-------|-------|-------|-------|------|------|------|
| META1_5012 | putative General stress protein 26; putative FMN-bindin  | 0.467 | 0.476 | 0.247 | 0.000 | 0.000 | 0.000 | 0.129 | 0.116 | 0.179 | 0.390 | 0.000 | 0.141 | 0.49  | 0.02 | n.d. | 0.00 |
| META1_5014 | antiprotein inner membrane protein                       | 0.584 | 0.612 | 0.520 | 0.879 | 0.594 | 0.591 | 0.364 | 0.348 | 0.516 | 0.572 | 0.635 | 0.410 | 0.97  | 0.06 | 0.97 | 0.05 |
| META1_5016 | DNA gyrase, subunit A (type II topoisomerase)            | 1.012 | 1.156 | 1.361 | 1.691 | 1.639 | 0.874 | 1.414 | 1.508 | 1.508 | 1.197 | 1.320 | 1.479 | 1.67  | 0.06 | 1.68 | 0.68 |
| META1_5017 | putative 31 kDa outer-membrane immunogenic protein       | 0.000 | 0.068 | 0.124 | 0.135 | 0.000 | 0.047 | 0.064 | 0.000 | 0.040 | 0.073 | 0.040 | 0.034 | 0.63  | 0.93 | 1.25 | 0.95 |
| META1_5018 | Pantetheine-phosphate adenylyltransferase                | 0.000 | 0.045 | 0.000 | 0.000 | 0.119 | 0.071 | 0.171 | 0.116 | 0.139 | 0.018 | 0.081 | 0.141 | 10.50 | 0.17 | 2.63 | 0.44 |
| META1_5019 | peptidyl-prolyl cis-trans isomerase (rotamase) precursor | 0.428 | 0.473 | 0.247 | 0.473 | 0.309 | 0.189 | 0.300 | 0.271 | 0.279 | 0.384 | 0.289 | 0.282 | 1.00  | 0.27 | 1.50 | 0.81 |
| META1_5020 | protein of unknown function                              | 0.000 | 0.000 | 0.000 | 0.000 | 0.048 | 0.000 | 0.000 | 0.000 | 0.000 | 0.000 | 0.020 | 0.000 | n.d.  | n.d. | 0.00 | 0.37 |
| META1_5021 | peptidyl-prolyl cis-trans isomerase B (rotamase B)(PPIa) | 1.090 | 0.702 | 0.495 | 0.879 | 0.618 | 0.473 | 0.707 | 0.599 | 1.012 | 0.717 | 0.595 | 0.773 | 1.46  | 0.89 | 1.95 | 0.51 |
| META1_5022 | putative response regulator receiver (CheY-like protein) | 0.195 | 0.295 | 0.124 | 0.000 | 0.095 | 0.095 | 0.086 | 0.155 | 0.139 | 0.209 | 0.081 | 0.128 | 0.83  | 0.22 | 2.38 | 0.41 |
| META1_5026 | conserved protein of unknown function                    | 0.000 | 0.000 | 0.000 | 0.000 | 0.000 | 0.000 | 0.086 | 0.000 | 0.040 | 0.000 | 0.000 | 0.040 | n.d.  | 0.12 | n.d. | 0.12 |
| META1_5030 | protein of unknown function                              | 0.467 | 0.363 | 0.396 | 0.135 | 0.214 | 0.236 | 0.214 | 0.213 | 0.337 | 0.399 | 0.212 | 0.255 | 0.86  | 0.04 | 1.81 | 0.30 |
| META1_5031 | Tungsten-containing formate dehydrogenase beta subu      | 0.467 | 0.838 | 0.866 | 0.271 | 0.285 | 0.189 | 1.114 | 1.063 | 1.290 | 0.762 | 0.242 | 1.156 | 2.05  | 0.07 | 7.17 | 0.00 |
| META1_5032 | Tungsten-containing formate dehydrogenase alpha sub      | 0.818 | 1.359 | 1.856 | 0.744 | 1.093 | 0.520 | 3.106 | 3.325 | 3.354 | 1.415 | 0.796 | 3.266 | 3.12  | 0.02 | 6.15 | 0.00 |
| META1_5040 | putative succinylcyan biosynthesis transport protein     | 0.000 | 0.000 | 0.000 | 0.000 | 0.000 | 0.000 | 0.000 | 0.039 | 0.000 | 0.000 | 0.000 | 0.013 | n.d.  | 0.37 | n.d. | 0.37 |
| META1_5043 | putative 3-oxoacyl-acyl carrier protein reductase (fabG) | 0.000 | 0.068 | 0.049 | 0.000 | 0.000 | 0.000 | 0.000 | 0.077 | 0.000 | 0.045 | 0.000 | 0.027 | 0.80  | 0.50 | n.d. | 0.37 |
| META1_5045 | conserved protein of unknown function                    | 0.000 | 0.091 | 0.000 | 0.000 | 0.000 | 0.000 | 0.000 | 0.039 | 0.000 | 0.036 | 0.000 | 0.013 | 0.50  | 0.95 | n.d. | 0.37 |
| META1_5047 | putative seryl-tRNA synthetase (Serine-tRNA ligase)      | 0.000 | 0.068 | 0.000 | 0.000 | 0.000 | 0.000 | 0.000 | 0.058 | 0.079 | 0.027 | 0.000 | 0.047 | 2.33  | 0.52 | n.d. | 0.12 |
| META1_5051 | putative acetolactate synthase large subunit (IlvG)      | 0.117 | 0.498 | 0.470 | 0.203 | 0.238 | 0.213 | 0.236 | 0.251 | 0.377 | 0.399 | 0.222 | 0.289 | 0.98  | 0.90 | 1.95 | 0.17 |
| META1_5052 | protein of unknown function                              | 0.000 | 0.136 | 0.173 | 0.135 | 0.119 | 0.095 | 0.064 | 0.058 | 0.079 | 0.118 | 0.111 | 0.067 | 0.77  | 0.27 | 0.91 | 0.02 |
| META1_5053 | putative branched-chain amino acid aminotransferase      | 0.078 | 0.136 | 0.049 | 0.000 | 0.000 | 0.000 | 0.107 | 0.039 | 0.079 | 0.091 | 0.000 | 0.074 | 1.10  | 0.73 | n.d. | 0.00 |
| META1_5054 | conserved protein of unknown function                    | 0.000 | 0.068 | 0.000 | 0.000 | 0.000 | 0.000 | 0.064 | 0.039 | 0.060 | 0.027 | 0.000 | 0.054 | 2.67  | 0.11 | n.d. | 0.00 |
| META1_5061 | conserved protein of unknown function, UFOP313 prot      | 0.000 | 0.136 | 0.124 | 0.000 | 0.119 | 0.118 | 0.171 | 0.097 | 0.179 | 0.100 | 0.101 | 0.148 | 2.00  | 0.39 | 2.20 | 0.40 |
| META1_5068 | protein of unknown function                              | 0.000 | 0.068 | 0.000 | 0.000 | 0.000 | 0.000 | 0.043 | 0.000 | 0.000 | 0.027 | 0.000 | 0.013 | 0.67  | 0.98 | n.d. | 0.37 |
| META1_5069 | putative UDP-N-acetyl-D-mannosaminuronic acid dehy       | 0.000 | 0.000 | 0.000 | 0.000 | 0.000 | 0.000 | 0.086 | 0.077 | 0.079 | 0.000 | 0.000 | 0.081 | n.d.  | 0.00 | n.d. | 0.00 |
| META1_5070 | Putative UDP-glucose 4-epimerase                         | 0.000 | 0.045 | 0.000 | 0.541 | 0.000 | 0.000 | 0.300 | 0.155 | 0.119 | 0.018 | 0.081 | 0.188 | 14.00 | 0.19 | 3.50 | 0.07 |
| META1_5071 | bifunctional GDP-fucose synthetase: GDP-4-dehydro-6-     | 0.000 | 0.000 | 0.000 | 0.000 | 0.048 | 0.000 | 0.064 | 0.058 | 0.040 | 0.000 | 0.020 | 0.054 | n.d.  | 0.00 | 4.00 | 0.12 |
| META1_5078 | Phosphoglycerate/bisphosphoglycerate mutase              | 0.273 | 0.159 | 0.099 | 0.203 | 0.190 | 0.213 | 0.321 | 0.271 | 0.337 | 0.163 | 0.202 | 0.309 | 2.56  | 0.10 | 2.30 | 0.00 |
| META1_5079 | NAD(P)-dependent aldo/keto reductase                     | 0.234 | 0.227 | 0.322 | 0.135 | 0.143 | 0.118 | 0.236 | 0.193 | 0.179 | 0.263 | 0.131 | 0.202 | 1.03  | 0.15 | 2.31 | 0.01 |
| META1_5080 | AAA ATPase                                               | 0.117 | 0.113 | 0.198 | 0.203 | 0.071 | 0.213 | 0.343 | 0.290 | 0.298 | 0.145 | 0.151 | 0.309 | 2.88  | 0.01 | 3.07 | 0.10 |
| META1_5081 | protein of unknown function                              | 0.000 | 0.113 | 0.049 | 0.000 | 0.143 | 0.213 | 0.214 | 0.155 | 0.099 | 0.064 | 0.151 | 0.155 | 3.29  | 0.48 | 1.53 | 0.35 |
| META1_5082 | protein of unknown function; putative membrane prot      | 0.000 | 0.000 | 0.000 | 0.000 | 0.000 | 0.000 | 0.000 | 0.000 | 0.000 | 0.000 | 0.000 | 0.000 | n.d.  | n.d. | 0.00 | 0.37 |
| META1_5084 | UDP-N-acetylmuramoylalanine-D-glutamate ligase           | 0.467 | 0.498 | 0.223 | 0.406 | 0.523 | 0.378 | 0.193 | 0.348 | 0.318 | 0.390 | 0.443 | 0.289 | 1.00  | 0.40 | 0.98 | 0.10 |
| META1_5086 | UDP-N-acetylmuramoyl-tripeptide-D-alanyl-D-alanine       | 0.389 | 0.702 | 0.569 | 0.271 | 0.428 | 0.402 | 0.257 | 0.406 | 0.377 | 0.581 | 0.393 | 0.349 | 0.81  | 0.11 | 1.33 | 0.80 |
| META1_5087 | UDP-N-acetylmuramoylalanine-D-glutamate-2,6-diamin       | 0.350 | 0.249 | 0.247 | 0.203 | 0.356 | 0.354 | 0.386 | 0.251 | 0.238 | 0.272 | 0.333 | 0.289 | 1.43  | 0.91 | 1.30 | 0.89 |
| META1_5090 | S-adenosyl-dependent methyltransferase                   | 0.117 | 0.000 | 0.049 | 0.000 | 0.095 | 0.071 | 0.107 | 0.097 | 0.060 | 0.045 | 0.071 | 0.087 | 2.60  | 0.39 | 1.86 | 0.38 |
| META1_5091 | DNA ligase, NAD(+) -dependent                            | 0.234 | 0.544 | 0.594 | 0.609 | 0.546 | 0.378 | 0.600 | 0.580 | 0.437 | 0.490 | 0.484 | 0.538 | 1.48  | 0.50 | 1.67 | 0.74 |
| META1_5094 | Carbohydrate kinase, PfkB                                | 1.090 | 0.748 | 0.742 | 1.217 | 1.021 | 1.418 | 1.221 | 1.063 | 1.171 | 0.826 | 1.220 | 1.149 | 1.88  | 0.08 | 1.41 | 0.66 |
| META1_5095 | peptidyl-prolyl cis-trans isomerase (Rotamase)           | 1.324 | 1.201 | 0.668 | 0.744 | 0.641 | 0.614 | 1.028 | 1.237 | 1.012 | 1.034 | 0.645 | 1.095 | 1.43  | 0.79 | 2.55 | 0.00 |
| META1_5096 | protein of unknown function                              | 0.156 | 0.113 | 0.173 | 0.000 | 0.000 | 0.071 | 0.000 | 0.000 | 0.000 | 0.145 | 0.030 | 0.000 | 0.00  | 0.00 | 0.00 | 0.37 |
| META1_5098 | 3-hydroxybutyryl-CoA dehydratase                         | 0.389 | 0.544 | 0.322 | 0.271 | 0.000 | 0.213 | 0.279 | 0.309 | 0.258 | 0.426 | 0.131 | 0.282 | 0.89  | 0.08 | 3.23 | 0.40 |
| META1_5099 | putative transcriptional regulator, GntR family          | 0.000 | 0.204 | 0.049 | 0.203 | 0.048 | 0.236 | 0.343 | 0.387 | 0.377 | 0.100 | 0.151 | 0.370 | 5.00  | 0.60 | 3.67 | 0.11 |
| META1_5100 | putative L-allo-threonine aldolase (IraC-like)           | 0.000 | 0.000 | 0.000 | 0.000 | 0.000 | 0.000 | 0.107 | 0.097 | 0.079 | 0.000 | 0.000 | 0.094 | n.d.  | 0.00 | n.d. | 0.00 |
| META1_5101 | conserved protein of unknown function; putative expor    | 0.234 | 0.295 | 0.049 | 0.000 | 0.143 | 0.095 | 0.000 | 0.000 | 0.027 | 0.172 | 0.000 | 0.027 | 0.21  | 0.67 | 0.00 | 0.37 |
| META1_5103 | conserved protein of unknown function; putative expor    | 0.000 | 0.000 | 0.000 | 0.000 | 0.071 | 0.118 | 0.107 | 0.000 | 0.040 | 0.000 | 0.081 | 0.047 | n.d.  | 0.12 | 0.88 | 0.96 |
| META1_5104 | conserved protein of unknown function; putative serine   | 0.078 | 0.227 | 0.272 | 0.000 | 0.071 | 0.142 | 0.086 | 0.077 | 0.060 | 0.209 | 0.091 | 0.074 | 0.48  | 0.11 | 1.22 | 0.33 |
| META1_5105 | conserved protein of unknown function                    | 0.000 | 0.000 | 0.000 | 0.000 | 0.000 | 0.000 | 0.000 | 0.039 | 0.000 | 0.000 | 0.000 | 0.013 | n.d.  | 0.37 | n.d. | 0.37 |
| META1_5110 | CTP synthetase                                           | 1.207 | 1.427 | 1.410 | 0.406 | 1.259 | 0.756 | 1.371 | 1.102 | 1.012 | 1.370 | 0.917 | 1.156 | 1.14  | 0.22 | 1.89 | 0.25 |
| META1_5111 | putative secG; preprotein translocase                    | 0.234 | 0.181 | 0.099 | 0.135 | 0.285 | 0.331 | 0.321 | 0.251 | 0.198 | 0.163 | 0.282 | 0.255 | 2.11  | 0.20 | 1.36 | 0.82 |
| META1_5112 | protein of unknown function                              | 0.000 | 0.091 | 0.000 | 0.000 | 0.000 | 0.095 | 0.000 | 0.000 | 0.060 | 0.036 | 0.040 | 0.020 | 0.75  | 0.98 | 0.75 | 0.97 |
| META1_5115 | triosephosphate isomerase                                | 0.779 | 0.521 | 0.445 | 0.609 | 0.285 | 0.543 | 0.557 | 0.464 | 0.357 | 0.553 | 0.443 | 0.457 | 1.11  | 0.35 | 1.55 | 0.98 |
| META1_5116 | putative peptidyl-prolyl cis-trans isomerase D           | 0.896 | 1.314 | 1.361 | 1.691 | 2.423 | 1.630 | 1.200 | 1.392 | 1.111 | 1.234 | 1.976 | 1.237 | 1.35  | 0.76 | 0.94 | 0.04 |
| META1_5117 | anthranilate synthase component I                        | 0.195 | 0.453 | 0.619 | 0.271 | 0.594 | 0.803 | 0.600 | 0.619 | 0.476 | 0.454 | 0.635 | 0.565 | 1.68  | 0.33 | 1.33 | 0.77 |
| META1_5119 | aminodeoxychorismate synthase component II, Glutam       | 0.078 | 0.068 | 0.000 | 0.203 | 0.143 | 0.047 | 0.214 | 0.174 | 0.119 | 0.045 | 0.111 | 0.168 | 5.00  | 0.50 | 2.27 | 0.45 |
| META1_5120 | anthranilate phosphoribosyltransferase                   | 0.000 | 0.159 | 0.198 | 0.135 | 0.143 | 0.095 | 0.150 | 0.135 | 0.139 | 0.136 | 0.121 | 0.141 | 1.40  | 0.34 | 1.75 | 0.33 |
| META1_5121 | indole-3-glycerol phosphate synthase                     | 0.078 | 0.204 | 0.134 | 0.135 | 0.148 | 0.135 | 0.118 | 0.236 | 0.135 | 0.154 | 0.151 | 0.168 | 1.47  | 0.57 | 1.67 | 0.61 |
| META1_5122 | molybdenum cofactor biosynthesis protein C               | 0.000 | 0.091 | 0.049 | 0.000 | 0.190 | 0.095 | 0.214 | 0.155 | 0.119 | 0.064 | 0.000 | 0.013 | 0.29  | 0.57 | 1.30 | 0.37 |
| META1_5123 | putative molybdopterin biosynthesis-related protein      | 0.000 | 0.045 | 0.000 | 0.000 | 0.071 | 0.000 | 0.086 | 0.058 | 0.000 | 0.018 | 0.030 | 0.047 | 3.50  | 0.55 | 2.33 | 0.52 |
| META1_5124 | putative hydroxyacyl-(acyl-carrier-protein) dehydratase  | 0.389 | 0.159 | 0.124 | 0.271 | 0.665 | 0.213 | 0.386 | 0.329 | 0.437 | 0.200 | 0.413 | 0.383 | 2.59  | 0.14 | 1.39 | 0.75 |
| META1_5125 | Acyl-[acyl-carrier-protein]-UDP-N-acylglucosamine O-     | 0.312 | 0.249 | 0.198 | 0.406 | 0.333 | 0.307 | 0.386 | 0.541 | 0.318 | 0.245 | 0.333 | 0.417 | 2.30  | 0.07 | 1.88 | 0.43 |
| META1_5126 | conserved protein of unknown function                    | 0.000 | 0.204 | 0.124 | 0.000 | 0.000 | 0.118 | 0.171 | 0.116 | 0.099 | 0.127 | 0.050 | 0.128 | 1.36  | 0.34 | 3.80 | 0.12 |
| META1_5127 | Lipid A-disaccharide synthase                            | 0.000 | 0.091 | 0.000 | 0.000 | 0.119 | 0.118 | 0.086 | 0.116 | 0.079 | 0.036 | 0.101 | 0.094 | 3.50  | 0.12 | 1.40 | 0.34 |
| META1_5128 | conserved protein of unknown function, UFOP718 prot      | 0.000 | 0.091 | 0.049 | 0.000 | 0.048 | 0.000 | 0.107 | 0.097 | 0.079 | 0.054 | 0.020 | 0.094 | 2.33  | 0.42 | 7.00 | 0.15 |
| META1_5129 | citrate synthase                                         | 7.087 | 3.875 | 4.701 | 1.691 | 1.568 | 1.748 | 1.757 | 2.107 | 2.322 | 4.926 | 1.663 | 2.070 | 0.57  | 0.01 | 1.87 | 0.08 |
| META1_5130 | glutamate tRNA synthetase, catalytic subunit             | 0.467 | 1.065 | 0.965 | 0.406 | 0.713 | 0.591 | 0.814 | 0.908 | 0.635 | 0.889 | 0.615 | 0.786 | 1.19  | 0.98 | 1.92 | 0.16 |
| META1_5132 | SOS response transcriptional repressor, lexA             | 0.156 | 0.295 | 0.421 | 0.473 | 0.143 | 0.236 | 0.386 | 0.232 | 0.377 | 0.308 | 0.232 | 0.329 | 1.44  | 0.61 | 2.13 | 0.55 |
| META1_5133 | conserved protein of unknown function                    | 0.000 | 0.227 | 0.148 | 0.000 | 0.048 | 0.000 | 0.064 | 0.097 | 0.060 | 0.145 | 0.020 | 0.    |       |      |      |      |

|                   |                                                               |        |        |        |        |        |        |        |        |        |        |        |        |      |      |       |        |
|-------------------|---------------------------------------------------------------|--------|--------|--------|--------|--------|--------|--------|--------|--------|--------|--------|--------|------|------|-------|--------|
| META1_5234        | putative transmembrane adenylate/guanylate cyclase            | 0.000  | 0.068  | 0.049  | 0.135  | 0.095  | 0.071  | 0.086  | 0.039  | 0.040  | 0.045  | 0.091  | 0.054  | 1.60 | 0.36 | 0.89  | 0.11   |
| META1_5236        | Putative cobyrinic acid a,c-diamide synthase                  | 0.000  | 0.136  | 0.099  | 0.000  | 0.000  | 0.000  | 0.129  | 0.077  | 0.060  | 0.091  | 0.000  | 0.087  | 1.30 | 0.33 | n.d.  | 0.00   |
| META1_5237        | conserved protein of unknown function                         | 0.000  | 0.000  | 0.000  | 0.000  | 0.000  | 0.000  | 0.000  | 0.000  | 0.079  | 0.000  | 0.000  | 0.027  | n.d. | 0.37 | n.d.  | 0.37   |
| META1_5239        | 60 kDa chaperonin (protein Cpn60, groEL protein)              | 15.653 | 12.122 | 14.376 | 23.874 | 19.952 | 20.413 | 17.096 | 16.314 | 20.065 | 13.771 | 20.734 | 17.830 | 1.75 | 0.07 | 1.29  | 0.09   |
| META1_5240        | 10 kDa chaperonin (protein Cpn10, groES protein)              | 1.285  | 1.178  | 1.488  | 1.623  | 1.299  | 1.299  | 1.307  | 1.624  | 1.846  | 1.207  | 1.492  | 1.599  | 1.79 | 0.07 | 1.61  | 0.76   |
| META1_5241        | putative magnesium/cobalt transport protein                   | 0.000  | 0.000  | 0.099  | 0.000  | 0.000  | 0.000  | 0.095  | 0.118  | 0.107  | 0.058  | 0.091  | 0.108  | 4.00 | 0.12 | 1.78  | 0.37   |
| META1_5244        | putative glycolate oxidase subunit GlcE                       | 0.195  | 0.521  | 0.371  | 0.406  | 0.309  | 0.331  | 0.386  | 0.367  | 0.377  | 0.390  | 0.333  | 0.376  | 1.30 | 0.71 | 1.70  | 0.37   |
| META1_5250        | Mannose-1-phosphate guanylyltransferase/mannose-6-phosphate   | 0.000  | 0.045  | 0.173  | 0.000  | 0.285  | 0.284  | 0.257  | 0.309  | 0.218  | 0.082  | 0.242  | 0.262  | 4.33 | 0.55 | 1.63  | 0.36   |
| META1_5251        | methylmalonyl-CoA mutase, alpha subunit                       | 0.935  | 0.861  | 1.089  | 1.623  | 2.138  | 2.008  | 1.757  | 1.604  | 1.389  | 0.962  | 2.006  | 1.579  | 2.22 | 0.01 | 1.18  | 0.15   |
| META1_5255        | serine protease                                               | 0.000  | 0.045  | 0.000  | 0.000  | 0.095  | 0.071  | 0.000  | 0.039  | 0.060  | 0.018  | 0.071  | 0.034  | 2.50 | 0.52 | 0.71  | 0.94   |
| META1_5256        | conserved protein of unknown function, containing N-terminus  | 0.000  | 0.000  | 0.000  | 0.000  | 0.000  | 0.000  | 0.000  | 0.000  | 0.000  | 0.000  | 0.020  | 0.000  | n.d. | n.d. | 0.00  | 0.37   |
| META1_5258        | ATP-dependent Clp protease adaptor protein clpS               | 0.000  | 0.045  | 0.000  | 0.000  | 0.000  | 0.000  | 0.000  | 0.000  | 0.000  | 0.018  | 0.000  | 0.054  | 4.00 | 0.12 | n.d.  | 0.00   |
| META1_5259        | ATPase and specificity subunit of ClpA-ClpP ATP-dependent     | 1.246  | 1.835  | 1.757  | 1.488  | 1.449  | 1.252  | 1.735  | 1.392  | 1.052  | 1.669  | 1.371  | 1.384  | 1.12 | 0.47 | 1.51  | 0.90   |
| META1_5260        | protein of unknown function                                   | 0.000  | 0.000  | 0.000  | 0.000  | 0.000  | 0.000  | 0.064  | 0.058  | 0.060  | 0.000  | 0.000  | 0.060  | n.d. | 0.00 | n.d.  | 0.00   |
| META1_5261        | 5-aminolevulinic acid synthase (ALAS)                         | 0.156  | 0.000  | 0.000  | 0.000  | 0.000  | 0.000  | 0.000  | 0.000  | 0.000  | 0.036  | 0.000  | 0.000  | 0.00 | 0.37 | n.d.  | n.d.   |
| META1_5263        | aerobic magnesium-protoporphylin IX monomethyl ester synthase | 0.857  | 0.000  | 0.000  | 0.000  | 0.000  | 0.000  | 0.000  | 0.000  | 0.000  | 0.020  | 0.000  | 0.000  | 0.00 | 0.37 | n.d.  | n.d.   |
| META1_5267        | photosynthetic reaction center subunit H                      | 1.129  | 0.000  | 0.000  | 0.000  | 0.000  | 0.000  | 0.000  | 0.000  | 0.000  | 0.263  | 0.000  | 0.000  | 0.00 | 0.37 | n.d.  | n.d.   |
| META1_5269        | Nig-protoporphyrin IX methyl transferase                      | 0.117  | 0.000  | 0.000  | 0.000  | 0.000  | 0.000  | 0.000  | 0.000  | 0.000  | 0.027  | 0.000  | 0.000  | 0.00 | 0.37 | n.d.  | n.d.   |
| META1_5272        | protycholorophyllide reductase Bchl subunit                   | 0.156  | 0.000  | 0.000  | 0.000  | 0.000  | 0.000  | 0.000  | 0.000  | 0.000  | 0.036  | 0.000  | 0.000  | 0.00 | 0.37 | n.d.  | n.d.   |
| META1_5273        | protycholorophyllide reductase subunit BchlN                  | 0.545  | 0.000  | 0.000  | 0.000  | 0.000  | 0.000  | 0.000  | 0.000  | 0.000  | 0.127  | 0.000  | 0.000  | 0.00 | 0.37 | n.d.  | n.d.   |
| META1_5276        | transcriptional regulator PpsR-Cr1; Fts family                | 0.000  | 0.227  | 0.198  | 0.000  | 0.333  | 0.331  | 0.150  | 0.232  | 0.258  | 0.163  | 0.282  | 0.215  | 1.78 | 0.37 | 1.14  | 0.31   |
| META1_5282        | putative Gluconate 2-dehydrogenase cytochrome c subunit       | 0.545  | 0.136  | 0.000  | 0.000  | 0.000  | 0.000  | 0.000  | 0.000  | 0.000  | 0.181  | 0.000  | 0.000  | 0.00 | 0.12 | n.d.  | n.d.   |
| META1_5283        | 6-phosphogluconate dehydrogenase                              | 0.156  | 0.317  | 0.198  | 0.203  | 0.166  | 0.189  | 0.086  | 0.213  | 0.159  | 0.236  | 0.181  | 0.155  | 0.88 | 0.30 | 1.28  | 0.39   |
| META1_5284        | 6-phosphogluconolactonase                                     | 0.117  | 0.091  | 0.049  | 0.000  | 0.000  | 0.000  | 0.064  | 0.077  | 0.040  | 0.082  | 0.020  | 0.060  | 1.00 | 0.37 | 4.50  | 0.13   |
| META1_5286        | putative beta-1,2-glucan ABC transporter, ATPase and protein  | 0.000  | 0.000  | 0.000  | 0.000  | 0.000  | 0.000  | 0.086  | 0.058  | 0.060  | 0.000  | 0.000  | 0.067  | n.d. | 0.00 | n.d.  | 0.00   |
| META1_5289        | conserved protein of unknown function                         | 0.000  | 0.000  | 0.000  | 0.000  | 0.048  | 0.000  | 0.064  | 0.000  | 0.000  | 0.000  | 0.020  | 0.020  | n.d. | 0.37 | 1.50  | 0.98   |
| META1_5290        | conserved protein of unknown function; putative membrane      | 0.701  | 0.793  | 0.866  | 0.812  | 0.404  | 0.331  | 0.793  | 0.541  | 0.595  | 0.798  | 0.433  | 0.638  | 1.08 | 0.18 | 2.21  | 0.39   |
| META1_5291        | putative endonuclease                                         | 0.000  | 0.045  | 0.000  | 0.000  | 0.000  | 0.000  | 0.000  | 0.000  | 0.000  | 0.018  | 0.000  | 0.013  | 1.00 | 1.00 | n.d.  | 0.37   |
| META1_5293        | putative outer-membrane immunogenic protein precursor         | 0.000  | 0.000  | 0.000  | 0.000  | 0.166  | 0.118  | 0.000  | 0.000  | 0.000  | 0.000  | 0.121  | 0.000  | n.d. | n.d. | 0.00  | 0.12   |
| META1_5294        | conserved protein of unknown function; omp like               | 0.195  | 0.113  | 0.198  | 0.541  | 0.000  | 0.331  | 0.150  | 0.058  | 0.139  | 0.163  | 0.222  | 0.114  | 0.94 | 0.29 | 0.77  | 0.20   |
| META1_5295        | conserved protein of unknown function; omp like               | 0.000  | 0.045  | 0.049  | 0.000  | 0.048  | 0.213  | 0.000  | 0.000  | 0.000  | 0.036  | 0.111  | 0.000  | 0.00 | 0.12 | n.d.  | 0.12   |
| META1_5297        | phosphoglucoamine mutase                                      | 0.156  | 0.249  | 0.421  | 0.406  | 0.523  | 0.307  | 0.300  | 0.329  | 0.337  | 0.290  | 0.413  | 0.323  | 1.50 | 0.46 | 1.17  | 0.23   |
| META1_5299        | cell division protease; ATP-dependent metalloprotease         | 0.779  | 0.680  | 1.089  | 0.676  | 1.473  | 0.756  | 1.007  | 1.160  | 0.814  | 0.853  | 1.048  | 0.995  | 1.57 | 0.39 | 1.42  | 0.78   |
| META1_5300        | tRNA(Lys)-lysidine synthase (tRNA(Lys)-lysidine synthetase)   | 0.000  | 0.000  | 0.000  | 0.000  | 0.000  | 0.000  | 0.000  | 0.039  | 0.000  | 0.000  | 0.000  | 0.013  | n.d. | 0.37 | n.d.  | 0.37   |
| META1_5301        | conserved protein of unknown function; putative export        | 0.078  | 0.159  | 0.198  | 0.135  | 0.285  | 0.260  | 0.386  | 0.271  | 0.377  | 0.154  | 0.252  | 0.343  | 3.00 | 0.04 | 2.04  | 0.16   |
| META1_5302        | Outer membrane lipoprotein omp16 precursor                    | 0.701  | 0.249  | 0.173  | 0.473  | 0.451  | 0.331  | 0.236  | 0.155  | 0.357  | 0.327  | 0.403  | 0.249  | 1.03 | 0.59 | 0.93  | 0.10   |
| META1_5305        | protein of unknown function                                   | 0.000  | 0.091  | 0.049  | 0.000  | 0.000  | 0.000  | 0.071  | 0.064  | 0.058  | 0.054  | 0.030  | 0.067  | 1.67 | 0.37 | 3.33  | 0.11   |
| META1_5306        | conserved protein of unknown function                         | 0.000  | 0.000  | 0.074  | 0.000  | 0.000  | 0.000  | 0.000  | 0.039  | 0.000  | 0.027  | 0.020  | 0.013  | 0.67 | 0.96 | 1.00  | 0.99   |
| META1_5307        | Porphobilinogen deaminase (PBG) (Hydroxymethylbilan synthase) | 0.273  | 0.295  | 0.322  | 0.203  | 0.499  | 0.402  | 0.321  | 0.348  | 0.516  | 0.299  | 0.413  | 0.397  | 1.79 | 0.16 | 1.44  | 0.72   |
| META1_5319        | conserved protein of unknown function, DUF892                 | 0.156  | 0.566  | 0.124  | 0.000  | 0.000  | 0.000  | 0.000  | 0.039  | 0.079  | 0.308  | 0.000  | 0.054  | 0.24 | 0.05 | n.d.  | 0.00   |
| META1_5320        | conserved protein of unknown function, UIP0061 protein        | 0.000  | 0.000  | 0.000  | 0.000  | 0.048  | 0.000  | 0.000  | 0.064  | 0.077  | 0.019  | 0.000  | 0.020  | 0.00 | 0.00 | 6.50  | 0.14   |
| META1_5321        | acetylaldehyde synthase III, large subunit                    | 1.830  | 1.926  | 2.326  | 1.150  | 2.399  | 1.772  | 1.692  | 1.624  | 1.985  | 2.050  | 1.945  | 1.767  | 1.16 | 0.23 | 1.36  | 0.88   |
| META1_5322        | acetylaldehyde synthase III, small subunit                    | 0.000  | 0.000  | 0.000  | 0.000  | 0.000  | 0.000  | 0.000  | 0.000  | 0.000  | 0.000  | 0.000  | 0.000  | 1.41 | 0.33 | 3.33  | 0.11   |
| META1_5323        | acetylaldehyde synthase III, small subunit                    | 0.935  | 1.110  | 0.792  | 0.947  | 1.235  | 1.016  | 0.964  | 1.198  | 1.052  | 0.953  | 1.099  | 1.075  | 1.52 | 0.32 | 1.47  | 0.94   |
| META1_5324        | putative glutathione S-transferase                            | 0.195  | 0.159  | 0.173  | 0.000  | 0.071  | 0.000  | 0.150  | 0.135  | 0.159  | 0.172  | 0.030  | 0.148  | 1.16 | 0.09 | 7.33  | 0.15   |
| META1_5325        | putative asparagine synthase, glutamine-hydrolyzing           | 0.117  | 0.295  | 0.124  | 0.000  | 0.000  | 0.000  | 0.047  | 0.086  | 0.077  | 0.191  | 0.020  | 0.081  | 0.57 | 0.08 | 6.00  | 0.14   |
| META1_5326        | putative aminohydrolase/amidohydrolase                        | 0.156  | 0.068  | 0.124  | 0.000  | 0.000  | 0.000  | 0.171  | 0.174  | 0.159  | 0.109  | 0.020  | 0.168  | 2.08 | 0.16 | 12.50 | 0.18   |
| META1_5327        | RNA polymerase sigma factor                                   | 0.000  | 0.000  | 0.000  | 0.000  | 0.000  | 0.000  | 0.000  | 0.077  | 0.060  | 0.000  | 0.000  | 0.047  | n.d. | 0.12 | n.d.  | 0.12   |
| META1_5330        | putative hybrid histidine kinase                              | 0.000  | 0.091  | 0.000  | 0.000  | 0.119  | 0.165  | 0.086  | 0.116  | 0.099  | 0.036  | 0.121  | 0.101  | 3.75 | 0.12 | 1.25  | 0.33   |
| META1_5345        | 30S ribosomal protein S20                                     | 0.156  | 0.249  | 0.322  | 0.812  | 0.285  | 0.449  | 0.536  | 0.251  | 0.437  | 0.254  | 0.433  | 0.403  | 2.14 | 0.17 | 1.40  | 0.64   |
| META1_CDS1132842D | protein of unknown function; RMQ09746                         | 0.000  | 0.113  | 0.148  | 0.000  | 0.071  | 0.000  | 0.000  | 0.077  | 0.099  | 0.100  | 0.050  | 0.060  | 0.82 | 0.95 | 1.80  | 0.95   |
| META1_CDS1135482D | protein of unknown function; RMQ09748                         | 0.000  | 0.045  | 0.000  | 0.000  | 0.119  | 0.000  | 0.000  | 0.039  | 0.060  | 0.018  | 0.050  | 0.034  | 2.50 | 0.52 | 1.00  | 0.46   |
| META1_CDS2273736R | protein of unknown function; RMQ08659                         | 0.000  | 0.113  | 0.074  | 0.000  | 0.000  | 0.000  | 0.086  | 0.077  | 0.060  | 0.073  | 0.000  | 0.074  | 1.38 | 0.34 | n.d.  | 0.00   |
| META1_CDS3243855D | protein of unknown function; RMQ08162                         | 0.000  | 0.000  | 0.000  | 0.000  | 0.000  | 0.000  | 0.000  | 0.000  | 0.079  | 0.000  | 0.000  | 0.027  | n.d. | 0.37 | n.d.  | 0.37   |
| META2_0003        | protein of unknown function                                   | 0.000  | 0.068  | 0.045  | 0.190  | 0.203  | 0.156  | 0.064  | 0.097  | 0.139  | 0.045  | 0.131  | 0.101  | 3.00 | 0.45 | 1.15  | 0.66   |
| META2_0004        | protein of unknown function                                   | 0.000  | 0.000  | 0.000  | 0.000  | 0.000  | 0.000  | 0.000  | 0.000  | 0.000  | 0.000  | 0.000  | 0.000  | n.d. | n.d. | 0.00  | 0.37   |
| META2_0006        | protein of unknown function                                   | 0.117  | 0.249  | 0.223  | 0.744  | 0.618  | 0.449  | 0.343  | 0.232  | 0.298  | 0.209  | 0.564  | 0.289  | 1.87 | 0.18 | 0.77  | 0.02   |
| META2_0008        | putative beta-ketocacyl synthase                              | 8.255  | 6.730  | 7.052  | 5.478  | 1.995  | 2.174  | 1.393  | 1.392  | 1.350  | 7.203  | 2.590  | 1.378  | 0.26 | 0.00 | 0.80  | 0.09   |
| META2_0009        | Putative flavin-containing monooxygenase                      | 2.920  | 1.835  | 1.955  | 4.473  | 0.404  | 0.284  | 0.000  | 0.097  | 0.000  | 2.132  | 0.363  | 0.034  | 0.02 | 0.38 | 0.14  | 0.19   |
| META2_0010        | protein of unknown function                                   | 5.957  | 7.205  | 8.141  | 4.531  | 1.734  | 1.252  | 0.578  | 1.160  | 1.052  | 7.257  | 1.945  | 0.941  | 0.18 | 0.00 | 0.73  | 0.12   |
| META2_0011        | protein of unknown function                                   | 3.037  | 3.036  | 3.415  | 1.014  | 0.594  | 0.331  | 0.236  | 0.309  | 0.198  | 3.175  | 0.544  | 0.249  | 0.11 | 0.00 | 0.69  | 0.07   |
| META2_0012        | Putative malonyl-CoA-acyl-carrier-protein                     | 0.156  | 0.227  | 0.421  | 0.000  | 0.000  | 0.000  | 0.000  | 0.000  | 0.000  | 0.281  | 0.000  | 0.000  | 0.00 | 0.00 | n.d.  | n.d.   |
| META2_0013        | protein of unknown function                                   | 0.273  | 0.385  | 0.396  | 0.135  | 0.071  | 0.000  | 0.064  | 0.058  | 0.060  | 0.363  | 0.050  | 0.060  | 0.23 | 0.00 | 1.80  | 0.31   |
| META2_0014        | putative fatty-acyl-CoA ligase (Acyl-CoA synthetase)          | 5.957  | 5.007  | 5.023  | 0.947  | 0.641  | 0.142  | 0.386  | 0.715  | 0.337  | 5.234  | 0.474  | 0.484  | 0.12 | 0.00 | 1.53  | 0.97   |
| META2_0015        | Putative thioesterase                                         | 0.312  | 0.680  | 0.470  | 0.000  | 0.000  | 0.000  | 0.000  | 0.077  | 0.000  | 0.517  | 0.020  | 0.027  | 0.07 | 0.23 | 2.00  | 0.97   |
| META2_0016        | protein of unknown function, plant induced                    | 3.310  | 2.560  | 2.177  | 0.541  | 0.333  | 0.236  | 0.171  | 0.251  | 0.139  | 2.595  | 0.323  | 0.188  | 0.10 | 0.00 | 0.88  | 0.09</ |

|            |                                                        |        |       |       |        |       |       |       |       |         |       |       |       |      |      |       |      |
|------------|--------------------------------------------------------|--------|-------|-------|--------|-------|-------|-------|-------|---------|-------|-------|-------|------|------|-------|------|
| META2_0419 | protein of unknown function, putative Response regula  | 0.000  | 0.113 | 0.049 | 0.000  | 0.261 | 0.307 | 0.279 | 0.271 | 0.298   | 0.064 | 0.242 | 0.282 | 6.00 | 0.59 | 1.75  | 0.37 |
| META2_0421 | putative multi-sensor Histidine kinase                 | 0.000  | 0.068 | 0.000 | 0.000  | 0.000 | 0.000 | 0.043 | 0.077 | 0.000   | 0.027 | 0.000 | 0.040 | 2.00 | 0.51 | n.d.  | 0.12 |
| META2_0421 | putative multi-sensor Histidine kinase                 | 0.000  | 0.000 | 0.000 | 0.000  | 0.048 | 0.000 | 0.000 | 0.000 | 0.000   | 0.000 | 0.020 | 0.000 | n.d. | n.d. | 0.00  | 0.37 |
| META2_0444 | protein of unknown function                            | 1.324  | 0.884 | 0.990 | 0.879  | 1.330 | 1.134 | 0.857 | 0.793 | 0.754   | 1.025 | 1.179 | 0.800 | 1.05 | 0.10 | 1.02  | 0.07 |
| META2_0446 | protein of unknown function                            | 0.000  | 0.000 | 0.000 | 0.000  | 0.000 | 0.047 | 0.000 | 0.049 | 0.040   | 0.000 | 0.020 | 0.000 | n.d. | 0.12 | 2.00  | 0.51 |
| META2_0468 | Putative transcriptional regulator                     | 0.000  | 0.000 | 0.000 | 0.000  | 0.000 | 0.000 | 0.000 | 0.000 | 0.000   | 0.000 | 0.000 | 0.000 | n.d. | n.d. | 0.00  | 0.37 |
| META2_0469 | conserved protein of unknown function                  | 0.000  | 0.000 | 0.000 | 0.000  | 0.071 | 0.000 | 0.000 | 0.000 | 0.000   | 0.000 | 0.030 | 0.000 | n.d. | n.d. | 0.00  | 0.37 |
| META2_0475 | conserved protein of unknown function                  | 0.000  | 0.000 | 0.000 | 0.000  | 0.000 | 0.047 | 0.000 | 0.000 | 0.000   | 0.000 | 0.020 | 0.000 | n.d. | n.d. | 0.00  | 0.37 |
| META2_0494 | protein of unknown function                            | 0.000  | 0.068 | 0.074 | 0.000  | 0.000 | 0.047 | 0.064 | 0.000 | 0.000   | 0.054 | 0.020 | 0.020 | 0.50 | 0.52 | 1.50  | 0.98 |
| META2_0497 | protein of unknown function                            | 0.000  | 0.045 | 0.000 | 0.000  | 0.000 | 0.000 | 0.000 | 0.000 | 0.040   | 0.018 | 0.000 | 0.013 | 1.00 | 0.99 | n.d.  | 0.37 |
| META2_0497 | protein of unknown function                            | 0.078  | 0.136 | 0.148 | 0.000  | 0.000 | 0.165 | 0.086 | 0.097 | 0.099   | 0.127 | 0.071 | 0.094 | 1.00 | 0.36 | 2.00  | 0.09 |
| META2_0504 | protein of unknown function                            | 1.246  | 1.065 | 1.435 | 2.029  | 1.948 | 1.559 | 1.542 | 1.585 | 1.548   | 1.243 | 1.794 | 1.559 | 1.69 | 0.06 | 1.30  | 0.12 |
| META2_0520 | protein of unknown function                            | 0.000  | 0.000 | 0.000 | 0.000  | 0.000 | 0.000 | 0.000 | 0.000 | 0.040   | 0.000 | 0.000 | 0.013 | n.d. | 0.37 | n.d.  | 0.37 |
| META2_0526 | putative replication protein B                         | 0.000  | 0.000 | 0.000 | 0.000  | 0.048 | 0.071 | 0.107 | 0.000 | 0.060   | 0.000 | 0.050 | 0.054 | n.d. | 0.12 | 1.60  | 0.96 |
| META2_0526 | putative replication protein B                         | 0.000  | 0.045 | 0.099 | 0.000  | 0.214 | 0.213 | 0.129 | 0.135 | 0.159   | 0.054 | 0.181 | 0.141 | 3.50 | 0.49 | 1.17  | 0.31 |
| META2_0527 | putative replication protein A                         | 0.000  | 0.113 | 0.124 | 0.000  | 0.166 | 0.165 | 0.086 | 0.116 | 0.099   | 0.091 | 0.141 | 0.101 | 1.50 | 0.35 | 1.07  | 0.31 |
| META2_0529 | protein of unknown function                            | 0.156  | 0.181 | 0.148 | 0.000  | 0.071 | 0.071 | 0.129 | 0.097 | 0.079   | 0.163 | 0.060 | 0.101 | 0.83 | 0.03 | 2.50  | 0.42 |
| META2_0534 | protein of unknown function                            | 1.090  | 1.178 | 1.113 | 1.488  | 1.093 | 1.536 | 0.836 | 0.580 | 0.734   | 1.134 | 1.341 | 0.712 | 0.85 | 0.01 | 0.80  | 0.01 |
| META2_0554 | protein of unknown function                            | 0.000  | 0.000 | 0.000 | 0.000  | 0.000 | 0.000 | 0.043 | 0.058 | 0.099   | 0.000 | 0.000 | 0.067 | n.d. | 0.00 | n.d.  | 0.00 |
| META2_0562 | protein of unknown function                            | 0.000  | 0.000 | 0.000 | 0.000  | 0.000 | 0.000 | 0.000 | 0.058 | 0.040   | 0.000 | 0.000 | 0.034 | n.d. | 0.12 | n.d.  | 0.12 |
| META2_0570 | protein of unknown function                            | 0.000  | 0.068 | 0.000 | 0.000  | 0.000 | 0.000 | 0.000 | 0.000 | 0.000   | 0.027 | 0.000 | 0.000 | 0.00 | 0.37 | n.d.  | n.d. |
| META2_0573 | conserved protein of unknown function                  | 0.195  | 0.431 | 0.297 | 0.000  | 0.000 | 0.000 | 0.279 | 0.174 | 0.278   | 0.327 | 0.000 | 0.242 | 1.00 | 0.50 | n.d.  | 0.00 |
| META2_0577 | protein of unknown function                            | 0.000  | 0.000 | 0.000 | 0.000  | 0.000 | 0.047 | 0.107 | 0.155 | 0.139   | 0.000 | 0.020 | 0.134 | n.d. | 0.00 | 10.00 | 0.17 |
| META2_0636 | putative metal dependent phosphohydrolase (HD dom      | 0.078  | 0.159 | 0.148 | 0.000  | 0.119 | 0.142 | 0.086 | 0.058 | 0.079   | 0.136 | 0.111 | 0.074 | 0.73 | 0.12 | 1.00  | 0.30 |
| META2_0638 | protein of unknown function                            | 0.000  | 0.113 | 0.000 | 0.000  | 0.000 | 0.000 | 0.000 | 0.000 | 0.040   | 0.045 | 0.000 | 0.013 | 0.40 | 0.94 | n.d.  | 0.37 |
| META2_0642 | protein of unknown function                            | 0.000  | 0.000 | 0.000 | 0.000  | 0.048 | 0.047 | 0.000 | 0.000 | 0.000   | 0.000 | 0.040 | 0.000 | n.d. | n.d. | 0.00  | 0.12 |
| META2_0652 | protein of unknown function                            | 0.000  | 0.091 | 0.124 | 0.338  | 0.285 | 0.236 | 0.129 | 0.271 | 0.139   | 0.082 | 0.272 | 0.181 | 3.00 | 0.45 | 1.00  | 0.12 |
| META2_0678 | putative multi-sensor hybrid Histidine kinase          | 0.000  | 0.000 | 0.000 | 0.000  | 0.000 | 0.000 | 0.000 | 0.058 | 0.000   | 0.000 | 0.000 | 0.020 | n.d. | 0.37 | n.d.  | 0.37 |
| META2_0684 | protein of unknown function                            | 0.000  | 0.000 | 0.000 | 0.000  | 0.048 | 0.000 | 0.043 | 0.039 | 0.040   | 0.000 | 0.020 | 0.040 | n.d. | 0.00 | 3.00  | 0.11 |
| META2_0691 | protein of unknown function                            | 0.000  | 0.000 | 0.000 | 0.000  | 0.048 | 0.000 | 0.000 | 0.000 | 0.000   | 0.000 | 0.020 | 0.000 | n.d. | n.d. | 0.00  | 0.37 |
| META2_0692 | protein of unknown function                            | 0.000  | 0.000 | 0.000 | 0.000  | 0.064 | 0.000 | 0.064 | 0.058 | 0.060   | 0.000 | 0.000 | 0.060 | n.d. | 0.00 | 0.00  | 0.06 |
| META2_0693 | N-acetyl-L-homoserine lactone synthetase MsaI          | 0.000  | 0.000 | 0.000 | 0.000  | 0.000 | 0.047 | 0.000 | 0.000 | 0.000   | 0.000 | 0.020 | 0.000 | n.d. | n.d. | 0.00  | 0.37 |
| META2_0697 | two component transcriptional regulator, winged helix  | 0.000  | 0.000 | 0.000 | 0.000  | 0.000 | 0.000 | 0.043 | 0.039 | 0.000   | 0.000 | 0.000 | 0.027 | n.d. | 0.12 | n.d.  | 0.12 |
| META2_0698 | protein of unknown function                            | 0.000  | 0.000 | 0.000 | 0.000  | 0.071 | 0.000 | 0.107 | 0.097 | 0.099   | 0.000 | 0.030 | 0.101 | n.d. | 0.00 | 5.00  | 0.13 |
| META2_0699 | protein of unknown function                            | 0.234  | 0.317 | 0.124 | 0.000  | 0.000 | 0.000 | 0.236 | 0.271 | 0.337   | 0.227 | 0.000 | 0.282 | 1.68 | 0.39 | n.d.  | 0.00 |
| META2_0707 | conserved protein of unknown function                  | 0.000  | 0.000 | 0.000 | 0.000  | 0.000 | 0.095 | 0.043 | 0.000 | 0.079   | 0.000 | 0.040 | 0.040 | n.d. | 0.12 | 1.50  | 0.49 |
| META2_0719 | protein of unknown function                            | 0.000  | 0.091 | 0.074 | 0.000  | 0.000 | 0.047 | 0.000 | 0.000 | 0.119   | 0.064 | 0.020 | 0.040 | 0.86 | 0.50 | 3.00  | 0.95 |
| META2_0738 | DNA topoisomerase III                                  | 0.350  | 0.544 | 0.470 | 0.338  | 0.000 | 0.095 | 0.193 | 0.193 | 0.278   | 0.472 | 0.091 | 0.222 | 0.63 | 0.02 | 3.67  | 0.41 |
| META2_0771 | putative site-specific DNA-methyltransferase           | 0.000  | 0.000 | 0.000 | 0.000  | 0.000 | 0.000 | 0.000 | 0.000 | 0.060   | 0.000 | 0.000 | 0.020 | n.d. | 0.37 | n.d.  | 0.37 |
| META2_0780 | protein of unknown function                            | 0.078  | 0.000 | 0.000 | 0.000  | 0.143 | 0.071 | 0.000 | 0.000 | 0.000   | 0.018 | 0.091 | 0.000 | 0.00 | 0.37 | 0.00  | 0.12 |
| META2_0816 | Superfamily I DNA and RNA helicase, helicase subunits- | 0.312  | 0.476 | 0.396 | 0.473  | 0.499 | 0.591 | 0.450 | 0.464 | 0.337   | 0.448 | 0.534 | 0.447 | 1.38 | 0.72 | 1.17  | 0.13 |
| META2_0823 | protein of unknown function                            | 0.117  | 0.068 | 0.000 | 0.203  | 0.119 | 0.000 | 0.107 | 0.097 | 0.179   | 0.054 | 0.081 | 0.128 | 3.17 | 0.42 | 2.38  | 0.34 |
| META2_0844 | protein of unknown function                            | 0.000  | 0.000 | 0.000 | 0.000  | 0.000 | 0.000 | 0.000 | 0.000 | 0.013   | 0.000 | 0.000 | 0.013 | n.d. | 0.00 | 0.00  | 0.37 |
| META2_0863 | AAA superfamily ATPase                                 | 0.000  | 0.000 | 0.000 | 0.000  | 0.048 | 0.000 | 0.107 | 0.077 | 0.079   | 0.000 | 0.020 | 0.087 | n.d. | 0.00 | 6.50  | 0.14 |
| META2_0870 | 2,5-diketo-D-glucanate reductase                       | 0.000  | 0.068 | 0.074 | 0.000  | 0.000 | 0.047 | 0.064 | 0.116 | 0.099   | 0.054 | 0.020 | 0.094 | 2.33 | 0.41 | 7.00  | 0.15 |
| META2_0871 | flavin-dependent oxidoreductase, putative chromate re  | 0.000  | 0.136 | 0.124 | 0.135  | 0.095 | 0.047 | 0.129 | 0.058 | 0.099   | 0.100 | 0.081 | 0.094 | 1.27 | 0.33 | 1.75  | 0.87 |
| META2_0883 | putative alcohol dehydrogenase cytochrome c subunit    | 0.000  | 0.136 | 0.000 | 0.000  | 0.119 | 0.095 | 0.000 | 0.000 | 0.000   | 0.054 | 0.091 | 0.000 | 0.00 | 0.37 | 0.00  | 0.12 |
| META2_0885 | Putative membrane-bound aldehyde dehydrogenase [p      | 0.000  | 0.159 | 0.000 | 0.000  | 0.048 | 0.071 | 0.043 | 0.000 | 0.000   | 0.064 | 0.050 | 0.013 | 0.29 | 0.93 | 0.40  | 0.54 |
| META2_0887 | Putative bacteriocin-bound                             | 0.779  | 0.816 | 0.520 | 0.203  | 0.071 | 0.189 | 0.407 | 0.445 | 0.437   | 0.699 | 0.141 | 0.430 | 0.83 | 0.03 | 4.57  | 0.03 |
| META2_0888 | putative peroxidase family protein                     | 0.000  | 0.000 | 0.000 | 0.000  | 0.000 | 0.000 | 0.000 | 0.000 | 0.060   | 0.000 | 0.000 | 0.020 | n.d. | 0.37 | n.d.  | 0.37 |
| META2_0891 | Putative ATP-dependent protease ATP-binding subunit    | 1.519  | 3.014 | 2.623 | 1.082  | 1.449 | 1.394 | 1.907 | 1.488 | 1.310   | 2.522 | 1.371 | 1.559 | 0.83 | 0.17 | 1.71  | 0.28 |
| META2_0893 | putative homolog cbpA; a curved DNA-binding protein;   | 0.000  | 0.068 | 0.074 | 0.000  | 0.000 | 0.000 | 0.000 | 0.077 | 0.040   | 0.054 | 0.000 | 0.040 | 1.00 | 0.97 | n.d.  | 0.12 |
| META2_0894 | chaperone Hsp70 in DNA biosynthesis/cell division      | 1.012  | 2.674 | 1.782 | 0.676  | 0.713 | 0.425 | 0.728 | 0.619 | 0.496   | 1.960 | 0.585 | 0.612 | 0.42 | 0.03 | 1.57  | 0.89 |
| META2_0905 | conserved protein of unknown function                  | 0.000  | 0.136 | 0.099 | 0.000  | 0.071 | 0.047 | 0.043 | 0.077 | 0.000   | 0.091 | 0.050 | 0.040 | 0.60 | 0.92 | 1.20  | 1.00 |
| META2_0906 | Putative heat shock protein Hsp20                      | 0.935  | 0.770 | 0.693 | 0.609  | 0.499 | 0.543 | 0.857 | 0.831 | 0.595   | 0.780 | 0.534 | 0.759 | 1.31 | 0.73 | 2.13  | 0.07 |
| META2_0907 | putative molecular chaperone small heat shock protein  | 1.090  | 0.770 | 0.495 | 0.338  | 0.570 | 0.425 | 0.321 | 0.445 | 0.516   | 0.744 | 0.474 | 0.430 | 0.78 | 0.10 | 1.36  | 0.87 |
| META2_0908 | Heat shock protein Hsp20                               | 0.740  | 0.521 | 0.371 | 0.541  | 0.404 | 0.331 | 0.750 | 0.754 | 0.496   | 0.517 | 0.393 | 0.665 | 1.74 | 0.41 | 2.54  | 0.09 |
| META2_0909 | putative Transcriptional regulator                     | 0.234  | 0.295 | 0.272 | 0.135  | 0.166 | 0.213 | 0.257 | 0.213 | 0.218   | 0.272 | 0.181 | 0.238 | 1.13 | 0.17 | 1.89  | 0.10 |
| META2_0910 | protease, ATP-dependent zinc-metallo                   | 0.000  | 0.091 | 0.049 | 0.203  | 0.119 | 0.000 | 0.193 | 0.193 | 0.079   | 0.054 | 0.081 | 0.155 | 3.83 | 0.49 | 2.88  | 0.37 |
| META2_0911 | protein disaggregation chaperone                       | 10.669 | 8.973 | 6.969 | 10.551 | 6.627 | 5.411 | 6.941 | 6.688 | 6.232   | 9.634 | 6.693 | 6.613 | 0.93 | 0.00 | 1.48  | 0.68 |
| META2_0912 | protein of unknown function                            | 2.258  | 2.153 | 2.549 | 0.947  | 0.926 | 1.158 | 1.007 | 1.450 | 1.369   | 2.322 | 1.028 | 1.284 | 0.75 | 0.01 | 1.87  | 0.17 |
| META2_0913 | conserved protein of unknown function                  | 0.389  | 0.272 | 0.272 | 0.473  | 0.285 | 0.213 | 0.171 | 0.097 | 0.139   | 0.299 | 0.282 | 0.134 | 0.61 | 0.01 | 0.71  | 0.04 |
| META2_0915 | conserved protein of unknown function                  | 0.195  | 0.272 | 0.272 | 0.271  | 0.095 | 0.118 | 0.129 | 0.097 | 0.139   | 0.254 | 0.131 | 0.121 | 0.64 | 0.01 | 1.38  | 0.61 |
| META2_0916 | conserved protein of unknown function                  | 0.701  | 0.725 | 0.594 | 0.338  | 0.404 | 0.284 | 0.343 | 0.329 | 0.318   | 0.671 | 0.343 | 0.329 | 0.66 | 0.00 | 1.44  | 0.81 |
| META2_0918 | conserved protein of unknown function                  | 5.763  | 6.888 | 6.285 | 7.507  | 1.591 | 3.237 | 3.835 | 4.117 | 4.307   | 6.405 | 3.175 | 4.093 | 0.86 | 0.00 | 1.93  | 0.70 |
| META2_0919 | conserved protein of unknown function                  | 6.697  | 6.072 | 6.062 | 5.140  | 3.634 | 4.442 | 4.285 | 4.156 | 4.029   | 6.214 | 4.203 | 4.153 | 0.90 | 0.00 | 1.48  | 0.66 |
| META2_0924 | conserved protein of unknown function                  | 0.000  | 0.068 | 0.074 | 0.135  | 0.048 | 0.071 | 0.086 | 0.058 | 0.119   | 0.054 | 0.071 | 0.087 | 2.17 | 0.40 | 1.86  | 0.82 |
| META2_0925 | putative ATPase, P <sub>1</sub> type                   | 0.156  | 0.240 | 0.173 | 0.000  | 0.333 | 0.236 | 0.279 | 0.309 | 0.198</ |       |       |       |      |      |       |      |

|                  |                                                          |       |       |       |       |       |       |       |       |       |       |       |       |      |      |      |      |
|------------------|----------------------------------------------------------|-------|-------|-------|-------|-------|-------|-------|-------|-------|-------|-------|-------|------|------|------|------|
| META2_1333       | protein of unknown function                              | 0.000 | 0.000 | 0.000 | 0.000 | 0.000 | 0.071 | 0.000 | 0.000 | 0.000 | 0.000 | 0.030 | 0.000 | n.d. | n.d. | 0.00 | 0.37 |
| META2_1356       | protein of unknown function                              | 0.078 | 0.045 | 0.074 | 0.135 | 0.095 | 0.095 | 0.086 | 0.077 | 0.060 | 0.064 | 0.101 | 0.074 | 1.57 | 0.54 | 1.10 | 0.08 |
| META2_CDS509485D | protein of unknown function; RMQ09476                    | 0.000 | 0.204 | 0.000 | 0.000 | 0.000 | 0.000 | 0.000 | 0.000 | 0.000 | 0.082 | 0.000 | 0.000 | 0.00 | 0.37 | n.d. | n.d. |
| p1META_0006      | putative ATPase, ParA type                               | 0.000 | 0.159 | 0.173 | 0.000 | 0.071 | 0.118 | 0.086 | 0.193 | 0.000 | 0.127 | 0.081 | 0.094 | 1.00 | 0.97 | 1.75 | 0.96 |
| p1META_0009      | conserved protein of unknown function                    | 0.000 | 0.000 | 0.000 | 0.000 | 0.071 | 0.000 | 0.000 | 0.000 | 0.000 | 0.000 | 0.030 | 0.000 | n.d. | n.d. | 0.00 | 0.37 |
| p1META_0010      | protein of unknown function                              | 0.000 | 0.113 | 0.099 | 0.000 | 0.143 | 0.095 | 0.000 | 0.058 | 0.119 | 0.082 | 0.101 | 0.060 | 1.00 | 0.97 | 0.90 | 0.96 |
| p1META_0012      | DNA invertase gene rlgA                                  | 0.000 | 0.181 | 0.049 | 0.203 | 0.143 | 0.095 | 0.236 | 0.116 | 0.179 | 0.091 | 0.131 | 0.175 | 2.60 | 0.47 | 2.00 | 0.56 |
| p1META_0014      | protein of unknown function                              | 0.234 | 0.159 | 0.297 | 0.135 | 0.095 | 0.095 | 0.107 | 0.000 | 0.040 | 0.227 | 0.101 | 0.047 | 0.28 | 0.57 | 0.70 | 0.45 |
| p1META_0018      | protein of unknown function of                           | 0.234 | 0.249 | 0.198 | 0.203 | 0.190 | 0.118 | 0.107 | 0.097 | 0.179 | 0.227 | 0.161 | 0.128 | 0.76 | 0.04 | 1.19 | 0.30 |
| p2META_0020      | RND divalent metal cation efflux transporter CzcA        | 0.000 | 0.159 | 0.099 | 0.000 | 0.261 | 0.095 | 0.000 | 0.000 | 0.000 | 0.100 | 0.151 | 0.000 | 0.00 | 0.12 | 0.00 | 0.12 |
| p1META_0021      | efflux transporter, RND family, MFP subunit              | 0.000 | 0.045 | 0.000 | 0.000 | 0.190 | 0.165 | 0.000 | 0.000 | 0.000 | 0.018 | 0.151 | 0.000 | 0.00 | 0.37 | 0.00 | 0.12 |
| p1META_0029      | conserved protein of unknown function                    | 0.000 | 0.068 | 0.074 | 0.203 | 0.166 | 0.142 | 0.064 | 0.077 | 0.099 | 0.054 | 0.161 | 0.081 | 2.00 | 0.39 | 0.75 | 0.01 |
| p1META_0034      | conserved protein of unknown function                    | 0.000 | 0.068 | 0.099 | 0.000 | 0.048 | 0.118 | 0.129 | 0.000 | 0.079 | 0.064 | 0.071 | 0.067 | 1.43 | 0.98 | 1.43 | 0.97 |
| p1META_0047      | putative mobilization protein C                          | 0.000 | 0.317 | 0.124 | 0.271 | 0.333 | 0.213 | 0.343 | 0.425 | 0.417 | 0.172 | 0.272 | 0.397 | 3.11 | 0.49 | 2.19 | 0.06 |
| p2META_0004      | protein of unknown function                              | 0.000 | 0.000 | 0.000 | 0.000 | 0.048 | 0.000 | 0.000 | 0.058 | 0.000 | 0.000 | 0.020 | 0.020 | n.d. | 0.37 | 1.50 | 0.99 |
| p2META_0005      | protein of unknown function                              | 0.000 | 0.000 | 0.049 | 0.000 | 0.048 | 0.000 | 0.000 | 0.000 | 0.060 | 0.018 | 0.020 | 0.020 | 1.50 | 0.99 | 1.50 | 0.99 |
| p2META_0006      | conserved protein of unknown function                    | 0.000 | 0.000 | 0.000 | 0.000 | 0.095 | 0.118 | 0.129 | 0.116 | 0.159 | 0.000 | 0.091 | 0.134 | n.d. | 0.00 | 2.22 | 0.41 |
| p2META_0009      | conserved protein of unknown function                    | 0.000 | 0.045 | 0.000 | 0.000 | 0.071 | 0.000 | 0.000 | 0.000 | 0.000 | 0.018 | 0.030 | 0.000 | 0.00 | 0.37 | 0.00 | 0.37 |
| p2META_0010      | conserved protein of unknown function                    | 0.623 | 0.770 | 0.619 | 0.406 | 0.546 | 0.165 | 0.514 | 0.522 | 0.437 | 0.680 | 0.363 | 0.491 | 0.97 | 0.03 | 2.03 | 0.35 |
| p2META_0012      | site-specific DNA recombinase                            | 0.000 | 0.000 | 0.000 | 0.000 | 0.071 | 0.000 | 0.000 | 0.000 | 0.000 | 0.000 | 0.030 | 0.000 | n.d. | n.d. | 0.00 | 0.37 |
| p2META_0019      | transposase of ISMex38, Tn3 family                       | 0.000 | 0.000 | 0.074 | 0.000 | 0.000 | 0.000 | 0.000 | 0.000 | 0.000 | 0.027 | 0.000 | 0.000 | 0.00 | 0.37 | n.d. | n.d. |
| p2META_0020      | putative Plasmid stabilization protein                   | 0.000 | 0.091 | 0.000 | 0.000 | 0.000 | 0.000 | 0.043 | 0.077 | 0.040 | 0.036 | 0.000 | 0.054 | 2.00 | 0.09 | n.d. | 0.00 |
| p2META_0022      | DNA invertase gene rlgA                                  | 0.000 | 0.000 | 0.000 | 0.000 | 0.000 | 0.000 | 0.000 | 0.000 | 0.079 | 0.000 | 0.000 | 0.027 | n.d. | 0.37 | n.d. | 0.37 |
| p2META_0029      | Copper resistance copB protein                           | 0.584 | 0.000 | 0.124 | 0.338 | 0.333 | 0.284 | 0.043 | 0.000 | 0.079 | 0.181 | 0.312 | 0.040 | 0.30 | 0.82 | 0.19 | 0.66 |
| p2META_0030      | Copper resistance protein copA                           | 0.000 | 0.000 | 0.074 | 0.000 | 0.190 | 0.000 | 0.086 | 0.000 | 0.000 | 0.027 | 0.081 | 0.027 | 1.33 | 0.99 | 0.50 | 0.95 |
| p2META_0033      | Integration host factor (IHF) like DNA-binding protein   | 0.000 | 0.000 | 0.000 | 0.000 | 0.000 | 0.071 | 0.086 | 0.000 | 0.040 | 0.000 | 0.030 | 0.040 | n.d. | 0.12 | 2.00 | 0.51 |
| p2META_0035      | conserved protein of unknown function                    | 0.117 | 0.181 | 0.099 | 0.000 | 0.071 | 0.095 | 0.064 | 0.039 | 0.000 | 0.136 | 0.071 | 0.034 | 0.33 | 0.52 | 0.71 | 0.95 |
| p2META_0041      | conserved protein of unknown function                    | 0.000 | 0.000 | 0.000 | 0.000 | 0.000 | 0.000 | 0.000 | 0.058 | 0.000 | 0.000 | 0.000 | 0.020 | n.d. | 0.37 | n.d. | 0.37 |
| p2META_0042      | Conjugal transfer protein TraD                           | 0.000 | 0.000 | 0.000 | 0.000 | 0.000 | 0.000 | 0.000 | 0.039 | 0.000 | 0.000 | 0.000 | 0.013 | n.d. | 0.37 | n.d. | 0.37 |
| p3META_0006      | putative partitioning protein/Cobyrinic acid a,c-diamide | 0.000 | 0.113 | 0.000 | 0.271 | 0.166 | 0.165 | 0.171 | 0.097 | 0.159 | 0.045 | 0.181 | 0.141 | 4.20 | 0.13 | 1.17 | 0.23 |
| p3META_0007      | protein of unknown function                              | 0.000 | 0.000 | 0.000 | 0.000 | 0.071 | 0.000 | 0.000 | 0.039 | 0.079 | 0.000 | 0.030 | 0.040 | n.d. | 0.12 | 2.00 | 0.50 |
| p3META_0008      | protein of unknown function                              | 0.000 | 0.000 | 0.000 | 0.000 | 0.000 | 0.000 | 0.000 | 0.039 | 0.000 | 0.000 | 0.000 | 0.013 | n.d. | 0.37 | n.d. | 0.37 |
| p3META_0010      | conserved protein of unknown function                    | 0.000 | 0.113 | 0.124 | 0.000 | 0.071 | 0.047 | 0.000 | 0.058 | 0.079 | 0.091 | 0.050 | 0.047 | 0.70 | 0.94 | 1.40 | 0.98 |
| p3META_0012      | protein of unknown function                              | 0.000 | 0.068 | 0.000 | 0.000 | 0.000 | 0.000 | 0.043 | 0.000 | 0.000 | 0.027 | 0.000 | 0.013 | 0.67 | 0.98 | n.d. | 0.37 |
| p3META_0013      | protein of unknown function                              | 0.117 | 0.091 | 0.000 | 0.271 | 0.095 | 0.189 | 0.129 | 0.135 | 0.119 | 0.064 | 0.161 | 0.128 | 2.71 | 0.41 | 1.19 | 0.41 |
| p3META_0015      | protein of unknown function                              | 0.000 | 0.091 | 0.000 | 0.000 | 0.000 | 0.000 | 0.043 | 0.058 | 0.000 | 0.036 | 0.000 | 0.034 | 1.25 | 0.48 | n.d. | 0.12 |
| p3META_0024      | conserved protein of unknown function                    | 0.000 | 0.091 | 0.000 | 0.000 | 0.071 | 0.000 | 0.000 | 0.039 | 0.040 | 0.036 | 0.030 | 0.027 | 1.00 | 0.47 | 1.33 | 0.48 |
| p3META_0028      | protein of unknown function                              | 0.000 | 0.045 | 0.000 | 0.000 | 0.000 | 0.000 | 0.000 | 0.000 | 0.040 | 0.018 | 0.000 | 0.013 | 1.00 | 0.99 | n.d. | 0.37 |
| p3META_0030      | DNA invertase gene rlgA                                  | 0.000 | 0.000 | 0.000 | 0.000 | 0.071 | 0.095 | 0.086 | 0.039 | 0.060 | 0.000 | 0.071 | 0.060 | n.d. | 0.00 | 1.29 | 0.33 |
| p3META_CDS5359D  | protein of unknown function                              | 0.000 | 0.000 | 0.000 | 0.000 | 0.000 | 0.000 | 0.000 | 0.000 | 0.079 | 0.000 | 0.000 | 0.027 | n.d. | 0.37 | n.d. | 0.37 |
| #N/A             | #N/A                                                     | 0.000 | 0.000 | 0.000 | 0.000 | 0.071 | 0.071 | 0.000 | 0.000 | 0.000 | 0.000 | 0.060 | 0.000 | n.d. | n.d. | 0.00 | 0.12 |
| #N/A             | #N/A                                                     | 0.000 | 0.000 | 0.074 | 0.000 | 0.000 | 0.000 | 0.000 | 0.000 | 0.000 | 0.027 | 0.000 | 0.000 | 0.00 | 0.37 | n.d. | n.d. |
| #N/A             | #N/A                                                     | 0.000 | 0.000 | 0.000 | 0.000 | 0.000 | 0.000 | 0.086 | 0.000 | 0.000 | 0.000 | 0.000 | 0.027 | n.d. | 0.37 | n.d. | 0.37 |
| #N/A             | #N/A                                                     | 0.156 | 0.000 | 0.000 | 0.135 | 0.071 | 0.000 | 0.064 | 0.058 | 0.099 | 0.036 | 0.050 | 0.074 | 2.75 | 0.09 | 2.20 | 0.33 |
| #N/A             | #N/A                                                     | 0.584 | 1.178 | 1.237 | 1.014 | 0.404 | 0.756 | 0.728 | 1.005 | 1.092 | 1.061 | 0.645 | 0.948 | 1.21 | 0.94 | 2.20 | 0.35 |
| #N/A             | #N/A                                                     | 0.234 | 0.068 | 0.000 | 0.000 | 0.000 | 0.000 | 0.000 | 0.000 | 0.040 | 0.082 | 0.000 | 0.013 | 0.22 | 0.60 | n.d. | 0.37 |
| #N/A             | #N/A                                                     | 3.076 | 3.353 | 2.771 | 3.111 | 6.841 | 6.285 | 2.357 | 1.856 | 2.560 | 3.075 | 6.048 | 2.251 | 0.99 | 0.05 | 0.56 | 0.04 |
| #N/A             | #N/A                                                     | 0.117 | 0.113 | 0.074 | 0.000 | 0.000 | 0.142 | 0.064 | 0.000 | 0.000 | 0.100 | 0.060 | 0.020 | 0.27 | 0.14 | 0.50 | 0.95 |
| #N/A             | #N/A                                                     | 0.000 | 0.091 | 0.000 | 0.000 | 0.000 | 0.000 | 0.000 | 0.000 | 0.000 | 0.036 | 0.000 | 0.000 | 0.00 | 0.37 | n.d. | n.d. |
| #N/A             | #N/A                                                     | 0.000 | 0.000 | 0.000 | 0.000 | 0.000 | 0.000 | 0.000 | 0.000 | 0.119 | 0.000 | 0.000 | 0.040 | n.d. | 0.37 | n.d. | 0.37 |
| #N/A             | #N/A                                                     | 1.441 | 1.314 | 1.237 | 1.691 | 4.703 | 3.780 | 1.071 | 0.696 | 1.369 | 1.315 | 3.860 | 1.042 | 1.07 | 0.24 | 0.40 | 0.04 |
| #N/A             | #N/A                                                     | 0.156 | 0.340 | 0.074 | 0.000 | 0.000 | 0.118 | 0.107 | 0.000 | 0.079 | 0.200 | 0.050 | 0.060 | 0.41 | 0.46 | 1.80 | 0.50 |
| #N/A             | #N/A                                                     | 0.000 | 0.181 | 0.000 | 0.000 | 0.000 | 0.000 | 0.000 | 0.000 | 0.079 | 0.073 | 0.000 | 0.027 | 0.50 | 0.95 | n.d. | 0.37 |
| #N/A             | #N/A                                                     | 0.000 | 0.068 | 0.000 | 0.000 | 0.048 | 0.071 | 0.000 | 0.000 | 0.000 | 0.027 | 0.050 | 0.000 | 0.00 | 0.37 | 0.00 | 0.12 |
| #N/A             | #N/A                                                     | 1.519 | 2.288 | 1.782 | 1.082 | 4.371 | 3.497 | 1.071 | 0.831 | 1.409 | 1.923 | 3.508 | 1.102 | 0.77 | 0.05 | 0.47 | 0.13 |
| #N/A             | #N/A                                                     | 0.545 | 1.881 | 1.386 | 0.879 | 2.162 | 1.961 | 0.686 | 0.309 | 0.556 | 1.388 | 1.885 | 0.511 | 0.50 | 0.13 | 0.41 | 0.04 |
| #N/A             | #N/A                                                     | 0.000 | 0.113 | 0.000 | 0.000 | 0.000 | 0.000 | 0.000 | 0.000 | 0.000 | 0.045 | 0.000 | 0.000 | 0.00 | 0.37 | n.d. | n.d. |
| #N/A             | #N/A                                                     | 0.000 | 0.045 | 0.000 | 0.000 | 0.000 | 0.000 | 0.000 | 0.000 | 0.000 | 0.018 | 0.000 | 0.000 | 0.00 | 0.37 | n.d. | n.d. |
| #N/A             | #N/A                                                     | 1.869 | 2.062 | 1.806 | 2.705 | 1.686 | 1.630 | 1.864 | 1.430 | 1.786 | 1.923 | 1.814 | 1.687 | 1.18 | 0.24 | 1.39 | 0.46 |
| #N/A             | #N/A                                                     | 0.117 | 0.363 | 0.297 | 0.135 | 0.190 | 0.142 | 0.043 | 0.000 | 0.079 | 0.281 | 0.161 | 0.040 | 0.19 | 0.60 | 0.38 | 0.52 |
| #N/A             | #N/A                                                     | 0.000 | 0.159 | 0.049 | 0.000 | 0.000 | 0.000 | 0.000 | 0.000 | 0.000 | 0.082 | 0.000 | 0.000 | 0.00 | 0.12 | n.d. | n.d. |
| #N/A             | #N/A                                                     | 0.078 | 0.000 | 0.000 | 0.000 | 0.000 | 0.095 | 0.000 | 0.000 | 0.060 | 0.018 | 0.040 | 0.020 | 1.50 | 0.99 | 0.75 | 0.97 |
| #N/A             | #N/A                                                     | 0.078 | 0.521 | 0.322 | 0.000 | 0.166 | 0.165 | 0.064 | 0.000 | 0.040 | 0.345 | 0.141 | 0.034 | 0.13 | 0.63 | 0.36 | 0.87 |

Supplemental Table 2: List of proteins of the central metabolism

| Gene Number                 | Gene        | Description (gene name)                                                                    | oxalate vs acetate |         | oxalate vs methanol |         | Normalized spectra (%) |          |         |
|-----------------------------|-------------|--------------------------------------------------------------------------------------------|--------------------|---------|---------------------|---------|------------------------|----------|---------|
|                             |             |                                                                                            | fold-change        | p-value | fold-change         | p-value | Acetate                | Methanol | oxalate |
| Oxalate metabolism          |             |                                                                                            |                    |         |                     |         |                        |          |         |
| META1_0988                  | frc1        | formyl-CoA transferase, NAD(P)-binding                                                     | only on oxalate    | 0.00    | n.d.                | 0.00    | 0.00                   | 0.00     | 11.53   |
| META1_0990                  | oxc         | oxalyl-CoA decarboxylase (oxc, yfdU)                                                       | n.d.               | 0.00    | n.d.                | 0.00    | 0.00                   | 0.00     | 11.61   |
| META1_0992                  | oxiT        | oxalate/formate antiporter                                                                 | n.d.               | 0.00    | n.d.                | 0.00    | 0.00                   | 0.00     | 0.67    |
| META1_0993                  | oxiT        | oxalate/formate antiporter                                                                 | n.d.               | 0.00    | n.d.                | 0.00    | 0.00                   | 0.00     | 1.08    |
| META1_0999                  | frc2        | formyl-CoA transferase, NAD(P)-binding                                                     | n.d.               | 0.00    | n.d.                | 0.00    | 0.00                   | 0.00     | 1.47    |
| META1_1925                  | oxiT        | putative oxalate/formate antiporter                                                        | n.d.               | 0.00    | n.d.                | 0.00    | 0.00                   | 0.00     | 1.30    |
| META1_2127                  | oxiT        | putative oxalate/formate antiporter                                                        | n.d.               | 0.00    | 17.00               | 0.25    | 0.00                   | 0.04     | 0.69    |
| META1_2129                  | panE2       | oxalyl-CoA reductase                                                                       | 24.85              | 0.00    | 3.46                | 0.00    | 0.10                   | 0.72     | 2.48    |
| META1_2130                  | oxs         | oxalyl-CoA synthetase                                                                      | 16.50              | 0.89    | 2.92                | 0.00    | 0.10                   | 0.56     | 1.65    |
| C1 oxidation                |             |                                                                                            |                    |         |                     |         |                        |          |         |
| META1_5031                  | fdh1B       | tungsten-containing formate dehydrogenase beta subunit                                     | 1.52               | 0.07    | 4.78                | 0.00    | 0.76                   | 0.24     | 1.16    |
| META1_5032                  | fdh1A       | tungsten-containing formate dehydrogenase alpha subunit                                    | 2.31               | 0.02    | 4.10                | 0.00    | 1.42                   | 0.80     | 3.27    |
| META1_4846                  | fdh2C       | NAD-dependent formate dehydrogenase, Molybdenum containing, gamma subunit                  | n.d.               | 0.00    | 7.07                | 0.18    | 0.00                   | 0.05     | 0.36    |
| META1_4847                  | fdh2B       | NAD-dependent formate dehydrogenase, Molybdenum containing, beta subunit                   | n.d.               | 0.00    | n.d.                | 0.02    | 0.00                   | 0.00     | 0.00    |
| META1_4848                  | fdh2A       | NAD-dependent formate dehydrogenase, molybdenum containing, alpha subunit                  | n.d.               | 0.00    | 3.05                | 0.00    | 0.00                   | 1.47     | 4.50    |
| META1_4849                  | fdh2D       | NAD-linked formate dehydrogenase, Molybdenum containing, delta subunit                     | n.d.               | 0.00    | 1.68                | 0.44    | 0.00                   | 0.25     | 0.42    |
| META1_0303                  | fdh3A       | formate dehydrogenase alpha subunit precursor (tat pathway signal)                         | 2.06               | 0.46    | 0.68                | 0.83    | 33.57                  | 101.82   | 69.22   |
| META1_0304                  | fdh3B       | formate dehydrogenase iron-sulfur (beta) subunit                                           | n.d.               | 0.00    | 0.95                | 0.35    | 0.00                   | 14.11    | 13.44   |
| META1_0305                  | fdh3C       | formate dehydrogenase gamma (cytochrome) subunit                                           | 0.56               | 0.95    | 0.67                | 0.98    | 7.26                   | 6.05     | 4.03    |
| META1_2093                  | fdh4B       | formate dehydrogenase subunit B                                                            | 0.00               | 0.37    | n.d.                | 0.12    | 0.04                   | 0.00     | 0.00    |
| META1_2094                  | fdh4A       | formate dehydrogenase subunit A                                                            | 0.02               | 0.32    | 0.01                | 0.35    | 0.87                   | 0.92     | 0.01    |
| Energy metabolism           |             |                                                                                            |                    |         |                     |         |                        |          |         |
| META1_2956                  | pntAA       | NAD(P)+ transhydrogenase, subunit alpha part 1.                                            | 0.78               | 0.34    | 9.58                | 0.00    | 10.28                  | 0.84     | 8.02    |
| META1_2957                  | pntAB       | NAD(P) transhydrogenase, subunit alpha part 2                                              | 0.86               | 0.37    | 8.19                | 0.37    | 3.06                   | 0.32     | 2.64    |
| META1_3299                  | hppo        | H+ translocating pyrophosphate synthase                                                    | 0.70               | 0.01    | n.d.                | 0.00    | 0.62                   | 0.00     | 0.43    |
| TCA cycle                   |             |                                                                                            |                    |         |                     |         |                        |          |         |
| META1_2531                  | acs         | acetyl-CoA synthetase                                                                      | 0.72               | 0.00    | 2.14                | 0.00    | 4.65                   | 1.57     | 3.36    |
| META1_5129                  | glbA (lcbB) | citrate synthase                                                                           | 0.42               | 0.01    | 1.24                | 0.08    | 4.93                   | 1.66     | 2.07    |
| META1_2828                  | acnA        | aconitate hydratase                                                                        | 0.36               | 0.01    | 0.71                | 0.06    | 6.32                   | 3.25     | 2.29    |
| META1_3354                  | lcd         | NADP-dependent isocitrate dehydrogenase                                                    | 0.32               | 0.00    | 0.70                | 0.15    | 4.46                   | 2.07     | 1.44    |
| META1_1540                  | sucA        | 2-oxoglutarate dehydrogenase complex, E1 component                                         | 0.45               | 0.00    | 1.21                | 0.06    | 5.44                   | 2.01     | 2.43    |
| META1_1541                  | sucB        | 2-oxoglutarate dehydrogenase complex, dihydrolipoamide succinyltransferase                 | 0.34               | 0.00    | 1.07                | 0.43    | 3.43                   | 1.11     | 1.18    |
| META1_1542                  | lpo         | 2-oxoglutarate dehydrogenase, dihydrolipoamide dehydrogenase                               | 0.29               | 0.00    | 0.97                | 0.63    | 2.70                   | 0.81     | 0.78    |
| META1_1538                  | sucC        | succinyl-CoA synthetase, beta subunit                                                      | 0.36               | 0.00    | 0.67                | 0.07    | 3.77                   | 2.00     | 1.34    |
| META1_1539                  | sucD        | succinyl-CoA synthetase, alpha subunit                                                     | 0.48               | 0.02    | 0.76                | 0.09    | 2.33                   | 1.47     | 1.12    |
| META1_3860                  | sdhD        | succinate dehydrogenase delta subunit                                                      | 0.74               | 0.95    | 1.11                | 0.50    | 0.05                   | 0.03     | 0.03    |
| META1_3861                  | sdhA/B      | succinate dehydrogenase, flavoprotein subunit                                              | 0.33               | 0.00    | 1.11                | 0.46    | 2.08                   | 0.61     | 0.69    |
| META1_3863                  | sdhB        | succinate dehydrogenase, iron-sulfur subunit                                               | 0.28               | 0.01    | 0.97                | 0.08    | 0.38                   | 0.11     | 0.11    |
| META1_2857                  | fumC        | fumarate C                                                                                 | 0.48               | 0.01    | 1.50                | 0.03    | 3.15                   | 1.02     | 1.53    |
| META1_1537                  | mdh         | malate dehydrogenase                                                                       | 0.47               | 0.01    | 0.79                | 0.13    | 3.69                   | 2.19     | 1.73    |
| EMC pathway                 |             |                                                                                            |                    |         |                     |         |                        |          |         |
| META1_3700                  | phaA        | beta-ketothiolase                                                                          | 0.53               | 0.02    | 0.82                | 0.04    | 6.31                   | 4.04     | 3.32    |
| META1_3701                  | phaB        | acetoacetyl-CoA reductase                                                                  | 0.59               | 0.03    | 0.71                | 0.32    | 1.97                   | 1.63     | 1.16    |
| META1_3675                  | croR        | crotonase                                                                                  | 0.80               | 0.69    | 0.77                | 0.29    | 0.44                   | 0.46     | 0.36    |
| META1_0178                  | ccr         | crotonyl-CoA carboxylase/reductase                                                         | 0.54               | 0.01    | 0.48                | 0.00    | 2.78                   | 3.14     | 1.51    |
| META1_0839                  | epm         | ethylmalonyl-CoA/methylmalonyl-CoA epimerase                                               | 0.74               | 0.27    | 0.85                | 0.27    | 0.34                   | 0.29     | 0.25    |
| META1_0180                  | ecm         | ethylmalonyl-CoA mutase                                                                    | 1.01               | 0.73    | 0.70                | 0.02    | 2.00                   | 2.85     | 2.01    |
| META1_2223                  | msd         | methylsuccinyl-CoA dehydrogenase, putative isobutyryl-CoA dehydrogenase                    | 0.69               | 0.01    | 0.59                | 0.02    | 2.95                   | 3.45     | 2.02    |
| META1_4153                  | mcd         | mesaconyl-CoA hydratase                                                                    | 0.93               | 0.88    | 0.37                | 0.00    | 0.60                   | 1.51     | 0.56    |
| META1_0172                  | pccB        | propionyl-CoA carboxylase beta chain                                                       | 0.66               | 0.04    | 0.67                | 0.03    | 3.08                   | 3.04     | 2.04    |
| META1_3203                  | pccA        | propionyl-CoA carboxylase alpha subunit                                                    | 1.00               | 0.96    | 0.58                | 0.03    | 2.67                   | 4.64     | 2.67    |
| META1_2390                  | mcmB        | methylmalonyl-CoA mutase, beta subunit                                                     | 1.14               | 0.15    | 0.89                | 0.82    | 1.22                   | 1.56     | 1.40    |
| META1_5251                  | mcmA        | methylmalonyl-CoA mutase, alpha subunit                                                    | 1.64               | 0.01    | 0.79                | 0.15    | 0.96                   | 2.01     | 1.58    |
| META1_2137                  | mcl2        | malyl-CoA thioesterase                                                                     | 1.06               | 0.49    | 1.45                | 0.06    | 0.72                   | 0.52     | 0.76    |
| PHB metabolism              |             |                                                                                            |                    |         |                     |         |                        |          |         |
| META1_3304                  | phaC        | poly(3-hydroxyalkanoate) polymerase                                                        | 0.56               | 0.25    | 3.89                | 0.62    | 1.69                   | 0.24     | 0.94    |
| META1_0419                  | depA        | intracellular PHB depolymerase                                                             | 1.35               | 0.56    | 1.40                | 0.41    | 0.20                   | 0.19     | 0.27    |
| Serine cycle                |             |                                                                                            |                    |         |                     |         |                        |          |         |
| META1_3384                  | glyA        | serine hydroxymethyltransferase                                                            | 1.09               | 0.55    | 0.76                | 0.00    | 4.19                   | 6.04     | 4.56    |
| META1_1726                  | sga         | serine glyoxylate aminotransferase                                                         | 3.74               | 0.00    | 0.48                | 0.00    | 1.42                   | 11.02    | 5.32    |
| META1_1727                  | hprA        | hydroxypyruvate reductase, NAD(P)H-dependent.                                              | 3.20               | 0.01    | 0.63                | 0.02    | 0.48                   | 2.44     | 1.54    |
| META1_2944                  | gck         | glycerate kinase                                                                           | 1.86               | 0.00    | 0.52                | 0.00    | 0.63                   | 2.22     | 1.16    |
| META1_2984                  | eno         | enolase                                                                                    | 0.70               | 0.01    | 1.02                | 1.00    | 2.85                   | 1.97     | 2.00    |
| META1_1732                  | ppc         | phosphoenolpyruvate carboxylase                                                            | 9.48               | 0.00    | 0.58                | 0.00    | 0.23                   | 3.70     | 2.15    |
| META1_1731                  | mtkB        | malate thiokinase, small subunit                                                           | 3.78               | 0.00    | 0.46                | 0.00    | 0.64                   | 5.21     | 2.40    |
| META1_1730                  | mtkA        | malate thiokinase, large subunit                                                           | 5.81               | 0.00    | 0.43                | 0.00    | 0.23                   | 3.04     | 1.32    |
| META1_1733                  | mclA1       | malyl-CoA lyase/beta-methylmalyl-CoA lyase                                                 | 2.18               | 0.00    | 0.40                | 0.00    | 1.76                   | 9.51     | 3.84    |
| C1 pathways                 |             |                                                                                            |                    |         |                     |         |                        |          |         |
| META1_1729                  | fch         | methenyl tetrahydrofolate cyclohydrolase                                                   | 3.27               | 0.03    | 0.59                | 0.05    | 0.37                   | 2.07     | 1.22    |
| META1_1728                  | mtmA        | NADP-dependent methylene-tetrahydromethanopterin/methylene-tetrahydrofolate dehydrogenase  | 4.86               | 0.00    | 0.84                | 0.64    | 0.81                   | 4.67     | 3.92    |
| META1_0329                  | ftfl        | formate-tetrahydrofolate ligase (formyltetrahydrofolate synthetase)                        | 2.74               | 0.00    | 0.91                | 0.21    | 1.36                   | 4.10     | 3.73    |
| META1_1766                  | foe         | formaldehyde-activating enzyme (translation)                                               | 0.73               | 0.16    | 0.45                | 0.01    | 3.77                   | 6.09     | 2.76    |
| META1_1761                  | mtdB        | NAD(P)-dependent methylene tetrahydromethanopterin dehydrogenase                           | 1.18               | 0.21    | 0.99                | 0.06    | 1.40                   | 1.84     | 1.22    |
| META1_1763                  | mch         | N(5),N(10)-methyltetrahydromethanopterin cyclohydrolase (methenyl-H4MPT cyclohydrolase)    | 0.87               | 0.21    | 0.66                | 0.07    | 1.40                   | 1.84     | 1.22    |
| META1_1755                  | fhcC        | formyltransferase/hydrolase complex Fhc subunit C                                          | 0.57               | 0.23    | 1.01                | 0.93    | 0.57                   | 0.72     | 0.73    |
| META1_1756                  | fhcD        | formyltransferase/hydrolase complex Fhc subunit D                                          | 0.47               | 0.95    | 0.62                | 0.03    | 0.47                   | 0.79     | 0.49    |
| META1_1757                  | fhcA        | formyltransferase/hydrolase complex Fhc subunit A                                          | 0.87               | 0.73    | 0.89                | 0.43    | 0.87                   | 0.98     | 0.87    |
| META1_1758                  | fhcB        | formyltransferase/hydrolase complex Fhc subunit B                                          | 0.82               | 1.00    | 0.66                | 0.01    | 0.82                   | 1.16     | 0.77    |
| Serine / glycine metabolism |             |                                                                                            |                    |         |                     |         |                        |          |         |
| META1_0620                  | gcvP        | glycine decarboxylase, PLP-dependent, subunit (protein P) of glycine cleavage complex      | 1.10               | 0.55    | 29.09               | 0.92    | 3.75                   | 0.14     | 4.11    |
| META1_0622                  | gcvT        | glycine cleavage complex protein T, aminomethyltransferase, tetrahydrofolate-dependent     | 2.08               | 0.08    | 72.22               | 0.31    | 1.05                   | 0.03     | 2.18    |
| META1_0485                  | serC        | phosphoserine aminotransferase                                                             | 1.22               | 0.39    | 0.52                | 0.02    | 0.21                   | 0.49     | 0.26    |
| META1_2848                  | -           | putative phosphoserine phosphatase (serB-like)                                             | 1.42               | 0.31    | 1.40                | 0.40    | 0.21                   | 0.21     | 0.30    |
| META1_0105                  | serA        | D-3-phosphoglycerate dehydrogenase                                                         | 0.45               | 0.00    | 1.13                | 0.37    | 2.88                   | 1.14     | 1.29    |
| META1_0486                  | serA        | phosphoglycerate dehydrogenase                                                             | 1.35               | 0.38    | 0.90                | 0.95    | 0.21                   | 0.31     | 0.28    |
| C3 metabolism               |             |                                                                                            |                    |         |                     |         |                        |          |         |
| META1_1533                  | pck         | phosphoenolpyruvate carboxykinase                                                          | 0.03               | 0.99    | n.d.                | 0.12    | 1.37                   | 0.00     | 0.04    |
| META1_3097                  | ppdK        | pyruvate phosphate dikinase (Pyruvate, orthophosphate dikinase)                            | 0.61               | 0.01    | 1.08                | 0.56    | 5.90                   | 3.34     | 3.60    |
| META1_2941                  | pyk         | pyruvate kinase                                                                            | 1.19               | 0.35    | 0.34                | 0.00    | 0.62                   | 2.14     | 0.73    |
| META1_0594                  | dme         | NAD-dependent malic enzyme                                                                 | 0.44               | 0.00    | 1.55                | 0.01    | 5.38                   | 1.51     | 2.35    |
| META1_2987                  | pdhB        | pyruvate dehydrogenase E1 beta subunit                                                     | 0.40               | 0.01    | 1.71                | 0.02    | 4.00                   | 0.95     | 1.62    |
| META1_2986                  | pdhA        | pyruvate dehydrogenase E1 alpha subunit                                                    | 0.33               | 0.01    | 1.55                | 0.04    | 2.01                   | 0.43     | 0.67    |
| META1_2989                  | pdhC        | dihydrolipoamide acetyltransferase                                                         | 0.27               | 0.00    | 2.20                | 0.03    | 5.44                   | 0.67     | 1.47    |
| META1_2990                  | lpo         | dihydrolipoamide dehydrogenase, E3 Component of Pyruvate dehydrogenase multienzyme complex | 0.31               | 0.00    | 3.33                | 0.00    | 3.98                   | 0.37     | 1.24    |

| Scenario 1      |             |                 |          | Scenario 2      |             |                 |          |                 |                                       |                                                                 |  |
|-----------------|-------------|-----------------|----------|-----------------|-------------|-----------------|----------|-----------------|---------------------------------------|-----------------------------------------------------------------|--|
| Reaction number | Constraints | Reaction number | Results  | Reaction number | Constraints | Reaction number | Results  | Reaction number | Enzyme name                           | Reaction                                                        |  |
| EX-0007         | 0           | EX-0001         | 0        | EX-0007         | 0           | EX-0001         | 0        | EX-0001         | exchange flux : methanol              | = methano[e]                                                    |  |
| EX-0009         | 0           | EX-0002         | 9.2224   | EX-0009         | 0           | EX-0002         | 12.3621  | EX-0002         | exchange flux : oxygen                | = O2[e]                                                         |  |
| EX-0010         | 0           | EX-0003         | 1.7869   | EX-0010         | 0           | EX-0003         | 1.0561   | EX-0003         | exchange flux : nitrogen              | = NH3[e]                                                        |  |
| EX-0011         | 0           | EX-0004         | -60.1211 | EX-0011         | 0           | EX-0004         | -63.1796 | EX-0004         | exchange flux : CO2                   | = CO2[e]                                                        |  |
| EX-0012         | 0           | EX-0007         | 0        | EX-0012         | 0           | EX-0007         | 0        | EX-0007         | exchange flux : formaldehyde          | = formaldehyde[e]                                               |  |
| EX-0013         | 0           | EX-0008         | 0.2256   | EX-0013         | 0           | EX-0008         | 0.1333   | EX-0008         | exchange flux : phosphate             | = phosphate[e]                                                  |  |
| EX-0014         | 33.8        | EX-0009         | 0        | EX-0014         | 33.8        | EX-0009         | 0        | EX-0009         | exchange flux : succinate             | = succinate[e]                                                  |  |
| EX-0015         | 0           | EX-0010         | 0        | EX-0015         | 0           | EX-0010         | 0        | EX-0010         | exchange flux : fumarate              | = fumarate[e]                                                   |  |
| EX-0016         | 0           | EX-0011         | 0        | EX-0016         | 0           | EX-0011         | 0        | EX-0011         | exchange flux : citrate               | = citrate[e]                                                    |  |
| EX-0017         | 0           | EX-0012         | 0        | EX-0017         | 0           | EX-0012         | 0        | EX-0012         | exchange flux : glycolate             | = glycolate[e]                                                  |  |
| EX-0019         | 0           | EX-0013         | 0        | EX-0019         | 0           | EX-0013         | 0        | EX-0013         | exchange flux : formate               | = formate[e]                                                    |  |
| EX-0022         | 0           | EX-0014         | 33.8     | EX-0022         | 0           | EX-0014         | 33.8     | EX-0014         | exchange flux : oxalate               | = oxalate[e]                                                    |  |
| EX-0024         | 0           | EX-0015         | 0        | EX-0024         | 0           | EX-0015         | 0        | EX-0015         | exchange flux : acetate               | = acetate[e]                                                    |  |
| EX-0025         | 0           | EX-0016         | 0        | EX-0025         | 0           | EX-0016         | 0        | EX-0016         | exchange flux : D-glucosate           | = D-glucosate[e]                                                |  |
| EX-0027         | 0           | EX-0017         | 0        | EX-0027         | 0           | EX-0017         | 0        | EX-0017         | exchange flux : putrescine            | = putrescine[e]                                                 |  |
| EX-0028         | 0           | EX-0019         | 0        | EX-0028         | 0           | EX-0019         | 0        | EX-0019         | exchange flux : 2-oxoglutarate        | = 2-oxoglutarate[e]                                             |  |
| EX-0029         | 0           | EX-0020         | 0.0143   | EX-0029         | 0           | EX-0020         | 0.0084   | EX-0020         | exchange flux : SO42-                 | = SO42-[e]                                                      |  |
| EX-0030         | 0           | EX-0021         | 0.0008   | EX-0030         | 0           | EX-0021         | 0.0004   | EX-0021         | exchange flux : Na+                   | = Na+[e]                                                        |  |
| EX-0031         | 0           | EX-0022         | 0        | EX-0031         | 0           | EX-0022         | 0        | EX-0022         | exchange flux : thiosulfate           | = thiosulfate[e]                                                |  |
| EX-0032         | 0           | EX-0023         | 0        | EX-0032         | 0           | EX-0023         | 0        | EX-0023         | exchange flux : nitrate               | = NO3[e]                                                        |  |
| R-0001          | 0           | EX-0024         | 0        | R-0001          | 0           | EX-0024         | 0        | EX-0024         | exchange flux : L-glutamate           | = L-glutamate[e]                                                |  |
| R-0002          | 0           | EX-0025         | 0        | R-0002          | 0           | EX-0025         | 0        | EX-0025         | exchange flux : L-aspartate           | = L-aspartate[e]                                                |  |
| R-0026          | 0           | EX-0026         | -30.5264 | R-0026          | 0           | EX-0026         | -31.8651 | EX-0026         | exchange flux : H2O                   | = H2O[e]                                                        |  |
| R-0028          | 0           | EX-0027         | 0        | R-0028          | 0           | EX-0027         | 0        | EX-0027         | exchange flux : ethanolamine          | = ethanolamine[e]                                               |  |
| R-0029          | 0           | EX-0028         | 0        | R-0029          | 0           | EX-0028         | 0        | EX-0028         | exchange flux : (S)-malate            | = (S)-malate[e]                                                 |  |
| R-0031          | 0           | EX-0029         | 0        | R-0031          | 0           | EX-0029         | 0        | EX-0029         | exchange flux : pyruvate              | = pyruvate[e]                                                   |  |
| R-0033          | 0           | EX-0030         | 0        | R-0033          | 0           | EX-0030         | 0        | EX-0030         | exchange flux : D-glucose             | = D-glucose[e]                                                  |  |
| R-0106          | 0           | EX-0031         | 0        | R-0106          | 0           | EX-0031         | 0        | EX-0031         | exchange flux : D-ribose              | = D-ribose[e]                                                   |  |
| R-0230          | 0           | EX-0032         | 0        | R-0230          | 0           | EX-0032         | 0        | EX-0032         | exchange flux : 5-dehydro-D-glucosate | = 5-dehydro-D-glucosate[e]                                      |  |
| R-0234          | 0           | EX-0033         | 0        | R-0234          | 0           | EX-0033         | 0        | EX-0033         | exchange flux : Co2+                  | = Co2+[e]                                                       |  |
| R-0269          | 0           | EX-0034         | 0.1136   | R-0269          | 0           | EX-0034         | 0.0671   | EX-0034         | Biomass flux : L-rhamnose             | dTDP+L-rhamnose + H2O = L-rhamnose + dTDP                       |  |
| R-0402          | 0           | EX-0035         | 0.00035  | R-0402          | 0           | EX-0035         | 0.00035  | EX-0035         | Biomass flux : N-acetyl-D-glucosamine | UDP-N-acetyl-D-glucosamine + H2O = N-acetyl-D-glucosamine + UDP |  |
| R-0425          | 0           | EX-0036         | 0.0252   | R-0425          | 0           | EX-0036         | 0.0149   | EX-0036         | exchange flux : proton                | = H+[e]                                                         |  |
| R-0487          | 0           | EX-0037         | 0        | R-0487          | 0           | EX-0037         | 0        | EX-0037         | exchange flux : H2O2                  | = H2O2[e]                                                       |  |
| R-0621          | 0           | EX-0038         | 0.0014   | R-0621          | 0           | EX-0038         | 0.0008   | EX-0038         | exchange flux : Fe2+                  | = Fe2+[e]                                                       |  |
| R-0703          | 0           | EX-0039         | 0.0006   | R-0703          | 0           | EX-0039         | 0.0004   | EX-0039         | exchange flux : polybdate             | = molybdate[e]                                                  |  |
| R-0890          | 0           | EX-0040         | 0.0343   | R-0890          | 0           | EX-0040         | 0.0203   | EX-0040         | exchange flux : potassium             | = K+[e]                                                         |  |
| EX-0037         |             |                 |          |                 |             |                 |          |                 |                                       |                                                                 |  |

|        |         |        |         |        |                                                       |                                                                          |
|--------|---------|--------|---------|--------|-------------------------------------------------------|--------------------------------------------------------------------------|
| R-0060 | -0.5994 | R-0060 | -0.3543 | R-0060 | glyceraldehyde-3-phosphate dehydrogenase              | D-glyceraldehyde-3-phosphate + phosphate + NAD+ = 3-phospho-D-gly        |
| R-0061 | 0.2756  | R-0061 | 0.1629  | R-0061 | triosephosphate isomerase                             | D-glyceraldehyde-3-phosphate = glycercione-phosphate                     |
| R-0062 | 0.2593  | R-0062 | 0.1533  | R-0062 | fructose-bisphosphate aldolase                        | glycerone-phosphate + D-glyceraldehyde-3-phosphate = D-fructose-1,6-     |
| R-0063 | 0.2593  | R-0063 | 0.1533  | R-0063 | fructose-1,6-bisphosphatase                           | D-fructose-1,6-bisphosphate + H2O = D-fructose-6-phosphate + phosph      |
| R-0064 | 0.192   | R-0064 | 0.1135  | R-0064 | phosphoglucose isomerase                              | D-fructose-6-phosphate = D-glucose-6-phosphate                           |
| R-0065 | 0       | R-0065 | 0       | R-0065 | glucokinase                                           | ATP + D-glucose = ADP + D-glucose-6-phosphate                            |
| R-0066 | 0.0001  | R-0066 | 0.0001  | R-0066 | glucose-6-phosphate 1-dehydrogenase                   | D-glucose-6-phosphate + NADP+ = D-glucono-1,5-lactone-6-phosphate        |
| R-0067 | 0.0001  | R-0067 | 0.0001  | R-0067 | 6-phosphoglucosacconaldehyde                          | D-glucono-1,5-lactone-6-phosphate + H2O = 6-phospho-D-glucanate          |
| R-0068 | 0       | R-0068 | 0       | R-0068 | 6-phosphoglucanate dehydrogenase                      | 6-phospho-D-glucanate + NADP+ = D-ribulose-5-phosphate + CO2 + N         |
| R-0069 | -0.0746 | R-0069 | -0.0441 | R-0069 | D-ribulose-5-phosphate 3-epimerase                    | D-ribulose-5-phosphate = D-xylose-5-phosphate                            |
| R-0070 | -0.0745 | R-0070 | -0.0441 | R-0070 | ribose-5-phosphate isomerase                          | D-ribose-5-phosphate = D-ribulose-5-phosphate                            |
| R-0071 | -0.0638 | R-0071 | -0.0377 | R-0071 | D-xylose 5-phosphate phosphoketolase                  | D-xylose-5-phosphate + phosphate = acetylphosphate + D-glyceralde        |
| R-0072 | 0.0503  | R-0072 | 0.0297  | R-0072 | D-fructose 6-phosphate phosphoketolase                | D-fructose-6-phosphate + phosphate = acetylphosphate + D-erythrose-4     |
| R-0073 | -0.0108 | R-0073 | -0.0064 | R-0073 | transaldolase                                         | sedoheptulose-7-phosphate + D-glyceraldehyde-3-phosphate = D-erythr      |
| R-0074 | 0.0108  | R-0074 | 0.0064  | R-0074 | transketolase                                         | sedoheptulose-7-phosphate + D-glyceraldehyde-3-phosphate = D-ribose      |
| R-0075 | 0.0853  | R-0075 | 0.0637  | R-0075 | phosphoribosylpyrophosphate synthetase                | ATP + D-ribose-5-phosphate = AMP + 5-phosphoribosyl-1-pyrophosphate      |
| R-0076 | 0       | R-0076 | 0.0133  | R-0076 | phosphopentomutase                                    | alpha-D-ribose-1-phosphate = D-ribose-5-phosphate                        |
| R-0077 | 0.0007  | R-0077 | 0.0004  | R-0077 | 1-deoxy-D-xylose-5-phosphate synthase                 | pyruvate + D-glyceraldehyde-3-phosphate = 1-deoxy-D-xylose-5-phos        |
| R-0078 | 0       | R-0078 | 0       | R-0078 | 2-deoxyribose-5-phosphate aldolase                    | 2-deoxy-D-ribose-5-phosphate = D-glyceraldehyde-3-phosphate + aceta      |
| R-0079 | 0       | R-0079 | 0       | R-0079 | 6-phosphoglucanate dehydratase                        | 6-phospho-D-glucanate = 2-dehydro-3-deoxy-D-glucanate-6-phosphate        |
| R-0080 | 0       | R-0080 | 0       | R-0080 | 2-keto-3-deoxyglucanate 6-phosphate aldolase          | 2-dehydro-3-deoxy-D-glucanate-6-phosphate = pyruvate + D-glyceralde      |
| R-0081 | 0       | R-0081 | 0       | R-0081 | 2-keto-4-hydroxyglutarate aldolase                    | 4-hydroxy-2-oxoglutarate = pyruvate + glyoxylate                         |
| R-0082 | 0       | R-0082 | 0       | R-0082 | bisphosphoglycerate mutase                            | 3-phospho-D-glyceroylphosphate = 2,3-bisphospho-D-glycerate              |
| R-0083 | 0       | R-0083 | 0       | R-0083 | cob(II)lamina adenosyltransferase                     | ATP + cobinamide = triphosphate + adenosylcobinamide                     |
| R-0086 | 0       | R-0086 | 0       | R-0086 | glyoxylate reductase                                  | glyoxylate + NADH + H+ = glycolate + NAD+                                |
| R-0089 | 0.0483  | R-0089 | 0.0285  | R-0089 | succinyl-CoA synthetase                               | ATP + succinate + CoA = ADP + phosphate + succinyl-CoA                   |
| R-0090 | 0       | R-0090 | 0       | R-0090 | malate dehydrogenase, FAD/NAD(P)-binding domain       | (S)-malate + UQ = oxaloacetate + UQH2                                    |
| R-0094 | 0       | R-0094 | 0       | R-0094 | pyruvate phosphate dikinase                           | ATP + pyruvate + phosphate = AMP + phosphoenolpyruvate + diphosph        |
| R-0095 | 0       | R-0095 | 23.2254 | R-0095 | formate dehydrogenase (cytochrome-linked) periplasmic | formate[p] + 2 oxidized-cytochrome-c + CO2[p] = 2 reduced-cytochrome     |
| R-0097 | 0.0025  | R-0097 | 0.0015  | R-0097 | (R)-3-hydroxybutyryl-CoA dehydratase                  | (R)-3-hydroxybutyryl-CoA = crotonyl-CoA + H2O                            |
| R-0098 | 0       | R-0098 | 0       | R-0098 | ethylmalonyl-CoA epimerase                            | (2S)-ethylmalonyl-CoA = (2R)-ethylmalonyl-CoA                            |
| R-0099 | -0.6042 | R-0099 | -0.3571 | R-0099 | pyruvate kinase                                       | ATP + pyruvate = ADP + phosphoenolpyruvate                               |
| R-0101 | 0       | R-0101 | 0       | R-0101 | acetyl-CoA synthetase                                 | ATP + acetate + CoA = AMP + diphosphate + acetyl-CoA                     |
| R-0102 | 0       | R-0102 | 0       | R-0102 | S-lactoylglutathione hydrolase                        | S-lactoylglutathione + H2O = glutathione + D-lactate                     |
| R-0105 | 0       | R-0105 | 0       | R-0105 | pyruvate dehydrogenase/oxidase                        | pyruvate + H2O + 2 oxidized-cytochrome-c = acetate + CO2 + 2 reduce      |
| R-0106 | 0       | R-0106 | 0       | R-0106 | phosphate acetyltransferase-1                         | acetyl-CoA + phosphate = CoA + acetylphosphate                           |
| R-0107 | 0.0136  | R-0107 | 0.008   | R-0107 | acetate kinase                                        | acetate + ATP = acetylphosphate + ADP                                    |
| R-0108 | 0       | R-0108 | 0       | R-0108 | propanoate kinase                                     | propanoate + ATP = ADP + propionylphosphate                              |
| R-0109 | 0       | R-0109 | 0       | R-0109 | lactaldehyde dehydrogenase                            | (S)-lactaldehyde + NAD+ + H2O = (S)-lactate + NADH + 2 H+                |
| R-0110 | 0       | R-0110 | 0       | R-0110 | glycolaldehyde dehydrogenase                          | glycolaldehyde + NAD+ + H2O = glycolate + NADH + H+                      |
| R-0111 | 0       | R-0111 | 0       | R-0111 | lactoylglutathione lyase                              | S-lactoylglutathione = glutathione + methylglyoxal                       |
| R-0112 | 0       | R-0112 | 0       | R-0112 | phosphopentomutase 2                                  | deoxyribose-1-phosphate = 2-deoxy-D-ribose-5-phosphate                   |
| R-0113 | 0.074   | R-0113 | 0.0438  | R-0113 | amino acid transferase (leucine)                      | 4-methyl-2-oxopentanoate + L-glutamate = L-leucine + 2-oxoglutarate      |
| R-0114 | 0.0782  | R-0114 | 0.0462  | R-0114 | amino acid transferase (valine)                       | 3-methyl-2-oxobutanoate + L-glutamate = L-valine + 2-oxoglutarate        |
| R-0115 | 0.039   | R-0115 | 0.023   | R-0115 | amino acid transferase (isoleucine)                   | 2-keto-3-methyl-valerate + L-glutamate = L-isoleucine + 2-oxoglutarate   |
| R-0116 | 0.0782  | R-0116 | 0.0462  | R-0116 | valine tRNA synthetase                                | ATP + L-valine + tRNA(Val) = AMP + diphosphate + L-valyl-tRNA(Val)       |
| R-0117 | 0.0739  | R-0117 | 0.0437  | R-0117 | leucine tRNA synthetase                               | ATP + L-leucine + tRNA(Leu) = AMP + diphosphate + L-leucyl-tRNA(Leu)     |
| R-0118 | 0.0388  | R-0118 | 0.0229  | R-0118 | isoleucine tRNA synthetase                            | ATP + L-isoleucine + tRNA(Ile) = AMP + diphosphate + L-isoleucyl-tRNA    |
| R-0119 | 0.074   | R-0119 | 0.0438  | R-0119 | 2-isopropylmalate synthase                            | acetyl-CoA + 3-methyl-2-oxobutanoate + H2O = (2S)-2-isopropylmalate      |
| R-0120 | 0.074   | R-0120 | 0.0438  | R-0120 | 3-isopropylmalate dehydrogenase                       | 3-isopropylmalate + NAD+ = 2-isopropyl-3-oxosuccinate + NADH + H+        |
| R-0121 | 0.074   | R-0121 | 0.0438  | R-0121 | 2-isopropyl-3-oxosuccinate decarboxylase              | 2-isopropyl-3-oxosuccinate = 4-methyl-2-oxopentanoate + CO2              |
| R-0122 | 0.155   | R-0122 | 0.0916  | R-0122 | 2,3-dihydroxy-isovalerate dehydratase                 | 2,3-dihydroxy-isovalerate = 3-methyl-2-oxobutanoate + H2O                |
| R-0123 | 0.039   | R-0123 | 0.023   | R-0123 | 2,3-dihydroxy-3-methylvalerate dehydratase            | 2,3-dihydroxy-3-methylvalerate = 2-keto-3-methyl-valerate + H2O          |
| R-0124 | 0.135   | R-0124 | 0.0916  | R-0124 | acetolactate synthase                                 | 2 pyruvate = 2-acetolactate + CO2                                        |
| R-0125 | 0.039   | R-0125 | 0.023   | R-0125 | 2-aceto-2-hydroxy-butyrate synthase                   | pyruvate + 2-oxobutanoate + H+ = 2-aceto-2-hydroxy-butyrate + CO2        |
| R-0126 | 0.135   | R-0126 | 0.0916  | R-0126 | 2-acetolactate reductoisomerase                       | 2-acetolactate + NADPH + H+ = 2,3-dihydroxy-isovalerate + NADP+          |
| R-0127 | 0.039   | R-0127 | 0.023   | R-0127 | 2-aceto-2-hydroxy-butyrate reductoisomerase           | 2-aceto-2-hydroxy-butyrate + NADPH + H+ = 2,3-dihydroxy-3-methylval      |
| R-0128 | 0.074   | R-0128 | 0.0438  | R-0128 | 3-isopropylmalate isomerase                           | isopropylmalate + H2O = 3-isopropylmalate                                |
| R-0129 | -0.074  | R-0129 | -0.0438 | R-0129 | 2-isopropylmalate isomerase                           | isopropylmalate + H2O = (2S)-2-isopropylmalate                           |
| R-0130 | -0.1847 | R-0130 | -0.1092 | R-0130 | phosphoglucomutase                                    | D-glucose-1-phosphate = D-glucose-6-phosphate                            |
| R-0131 | 0       | R-0131 | 0       | R-0131 | phosphomannomutase                                    | D-mannose-1-phosphate = D-mannose-6-phosphate                            |
| R-0132 | 0       | R-0132 | 0       | R-0132 | beta-phosphoglucosyltransferase                       | b-D-glucose-1-phosphate = b-D-glucose-6-phosphate                        |
| R-0133 | 0.0711  | R-0133 | 0.042   | R-0133 | glucose-1-phosphate uridylyltransferase               | UTP + D-glucose-1-phosphate = diphosphate + UDP-glucose                  |
| R-0134 | 0       | R-0134 | 0       | R-0134 | UDP-glucose 4-epimerase                               | UDP-glucose = UDP-galactose                                              |
| R-0135 | 0       | R-0135 | 0       | R-0135 | UDP-glucose 6-dehydrogenase                           | UDP-glucose + 2 NAD+ + H2O = UDP-glucuronate + 2 NADH + 2 H+             |
| R-0136 | 0       | R-0136 | 0       | R-0136 | GDP-L-fucose synthase                                 | GDP-4-dehydro-6-deoxy-D-mannose + NADPH + H+ = GDP-fucose + N            |
| R-0137 | 0       | R-0137 | 0       | R-0137 | mannose-1-phosphate guanylyltransferase               | GTP + D-mannose-1-phosphate = GDP-mannose + diphosphate                  |
| R-0138 | 0       | R-0138 | 0       | R-0138 | mannose-6-phosphate isomerase                         | D-fructose-6-phosphate = D-mannose-6-phosphate                           |
| R-0139 | 1000    | R-0139 | 1000    | R-0139 | GDP-mannose 3,5-epimerase 1                           | GDP-mannose = GDP-galactose                                              |
| R-0140 | -1000   | R-0140 | -1000   | R-0140 | GDP-mannose 3,5-epimerase 2                           | GDP-mannose = GDP-glucose                                                |
| R-0141 | -1000   | R-0141 | -1000   | R-0141 | GDP-mannose 3,5-epimerase 3                           | GDP-glucose = GDP-galactose                                              |
| R-0142 | 0       | R-0142 | 0       | R-0142 | GDP-mannose 4,6-dehydratase                           | GDP-mannose = GDP-4-dehydro-6-deoxy-D-mannose + H2O                      |
| R-0143 | 0       | R-0143 | 0       | R-0143 | gluconate 2-dehydrogenase (periplasmic)               | D-gluconate[p] + 2 oxidized-cytochrome-c = 2-dehydro-D-gluconate[p] +    |
| R-0145 | 0       | R-0145 | 0       | R-0145 | gluconokinase                                         | ATP + D-gluconate = ADP + 6-phospho-D-gluconate                          |
| R-0146 | 0       | R-0146 | 0       | R-0146 | galactose mutarotase                                  | D-galactose[p] = b-D-galactose[p]                                        |
| R-0147 | 0       | R-0147 | 0       | R-0147 | aldose sugar dehydrogenase                            | D-glucose[p] + 2 oxidized-cytochrome-c = glucono-D-lactone[p] + 2 H+[p]  |
| R-0148 | 0       | R-0148 | 0       | R-0148 | L-fucose-1-phosphate aldolase                         | L-fucose-1-phosphate = glycercione-phosphate + (S)-lactaldehyde          |
| R-0149 | 0.0066  | R-0149 | 0.0039  | R-0149 | trehalose-6-phosphate synthase                        | UDP-glucose + D-glucose-6-phosphate = UDP + trehalose-6-phosphate        |
| R-0150 | 0.0066  | R-0150 | 0.0039  | R-0150 | trehalose-6-phosphate phosphatase                     | trehalose-6-phosphate + H2O = trehalose + phosphate                      |
| R-0151 | 0       | R-0151 | 0       | R-0151 | maltose alpha-D-glucosyltransferase                   | maltose = trehalose                                                      |
| R-0152 | 0       | R-0152 | 0       | R-0152 | maltoaldolase/trehalose trehalohydrolase              | maltoaldolase/trehalase = maltodextrin + trehalose                       |
| R-0153 | 0.0645  | R-0153 | 0.0381  | R-0153 | cellulose synthase                                    | UDP-glucose + (1,4-beta-D-glucosyl)(n) = UDP + (1,4-beta-D-glucosyl)(    |
| R-0154 | 0       | R-0154 | 0       | R-0154 | glycogen synthase                                     | UDP-glucose + (1,4-alpha-D-glucosyl)(n) = ADP + (1,4-alpha-D-glucosyl    |
| R-0155 | 0       | R-0155 | 0       | R-0155 | 1,4-alpha-glucan branching enzyme                     | (1,4-alpha-D-glucosyl)(n+1) = glycogen                                   |
| R-0156 | 0       | R-0156 | 0       | R-0156 | 4-a-glucanotransferase                                | limit-dextrin = limit-dextrin-with-short-branches                        |
| R-0157 | 0       | R-0157 | 0       | R-0157 | amylase-1,6-glucosidase                               | limit-dextrin-with-short-branches + H2O = debranched-limit-dextrin + b-C |
| R-0158 | 0       | R-0158 | 0       | R-0158 | glycogen phosphorylase                                | glycogen + phosphate = limit-dextrin + D-glucose-1-phosphate             |
| R-0159 | 0       | R-0159 | 0       | R-0159 | glucosylase                                           | debranched-limit-dextrin + n H2O = n b-D-glucose                         |
| R-0160 | 0       | R-0160 | 0       | R-0160 | alpha-D-glucose-1-phosphate cytidyltransferase        | CTP + D-glucose-1-phosphate = diphosphate + CDP-glucose                  |
| R-0161 | 0       | R-0161 | 0       | R-0161 | cdp-glucose 4,6-dehydratase                           | CDP-glucose = CDP-4-dehydro-6-deoxy-D-glucose + H2O                      |
| R-0162 | 0       | R-0162 | 0       | R-0162 | GDP-4-dehydro-6-deoxy-D-glucose 4-reductase           | CDP-4-dehydro-6-deoxy-D-glucose + NADPH + H+ = CDP-4-dehydro-3-          |
| R-0163 | 0.1136  | R-0163 | 0.0671  | R-0163 | dTDP-4-dehydrothiamine 3,5-epimerase                  | dTDP-4-dehydro-6-deoxy-D-glucose + dTDP-4-dehydro-6-deoxy-L-man          |
| R-0164 | 0.1136  | R-0164 | 0.0671  | R-0164 | dTDP-glucose 4,6-dehydratase                          | dTDP-glucose = dTDP-4-dehydro-6-deoxy-D-glucose + H2O                    |
| R-0165 | 0.1136  | R-0165 | 0.0671  | R-0165 | dTDP-4-dehydrothiamine reductase                      | dTDP-4-dehydro-6-deoxy-L-mannose + NADPH + H+ = dTDP-a-L-rham            |
| R-0166 | 0.1136  | R-0166 | 0.0671  | R-0166 | glucose-1-phosphate thymidyltransferase               | dTTP + D-glucose-1-phosphate = diphosphate + dTDP-glucose                |
| R-0167 | 0       | R-0167 | 0       | R-0167 | endo-1,4-D-glucanase                                  | (1,4-alpha-D-glucosyl)(n+1) + H2O = (1,4-alpha-D-glucosyl)(x) + short-g  |
| R-0168 | -0.0395 | R-0168 | -0.0233 | R-0168 | shikimate 5-dehydrogenase                             | shikimate + NADP+ = 3-dehydroshikimate + NADPH + H+                      |
| R-0169 | 0.0253  | R-0169 | 0.015   | R-0169 | prephenate dehydratase                                | prephenate = phenylpyruvate + H2O + CO2                                  |
| R-0170 | 0       | R-0170 | 0       | R-0170 | malonyl-CoA decarboxylase                             | malonyl-CoA = acetyl-CoA + CO2                                           |
| R-0171 | 0.1643  | R-0171 | 0.0971  | R-0171 | acetyl-CoA carboxylase                                | ATP + acetyl-CoA + HCO3- + H+ = ADP + phosphate + malonyl-CoA            |
| R-0174 | 0       | R-0174 | 0       | R-0174 | propionyl-CoA synthetase                              | ATP + propanoate + CoA = AMP + diphosphate + propionyl-CoA               |
| R-0175 | 0       | R-0175 | 0       | R-0175 | malonate decarboxylase                                | malonate = acetate + CO2                                                 |
| R-0176 | 0       | R-0176 | 0       | R-0176 | phosphate acetyltransferase 2                         | propionyl-CoA + phosphate = propionylphosphate + CoA                     |
| R-0177 | 0.0395  | R-0177 | 0.0233  | R-0177 | 2-dehydro-3-deoxyphosphohexonate aldolase             | phosphoenolpyruvate + D-erythrose-4-phosphate + H2O = 3-deoxy-D-ar       |
| R-0178 | 0.0395  | R-0178 | 0.0233  | R-0178 | 5-enolpyruvylshikimate-3-phosphate synthetase         | phosphoenolpyruvate + shikimate-3-phosphate + phosphate = 5-enolpy       |
| R-0179 | 0.0395  | R-0179 | 0.0233  | R-0179 | anthranilate + 5-phosphoribosyltransferase            | anthranilate + 5-phosphoribosyl-1-pyrophosphate = N-(5-phospho-beta-N    |
| R-0180 | 0.0001  | R-0180 | 0.0001  | R-0180 | phosphoribosylanthranilate isomerase                  | N-(5-phospho-beta-D-ribose)-anthranilate = 1-(2-carboxyphenylamino)-     |
| R-0181 | 0.0001  | R-0181 | 0.0001  | R-0181 | anthranilate synthase                                 | chorismate + L-glutamine = anthranilate + pyruvate + L-glutamate         |
| R-0182 | 0       | R-0182 | 0       | R-0182 | tryptophan synthase                                   | L-serine + indole-3-glycerol-phosphate = L-tryptophan + D-glyceraldehy   |
| R-0183 | 0.0001  | R-0183 | 0.0001  | R-0183 | tryptophan synthase A                                 | indole-3-glycerol-phosphate = indole + D-glyceraldehyde-3-phosphate      |
| R-0184 | 0.0001  | R-0184 | 0.0001  | R-0184 | tryptophan synthase B                                 | indole + L-serine = L-tryptophan + H2O                                   |
| R-0185 | 0.0394  | R-0185 | 0.0233  | R-0185 | chorismate mutase                                     | chorismate = prephenate                                                  |
| R-0186 | 0       | R-0186 | 0       | R-0186 | aminodeoxychorismate synthase                         | chorismate + L-glutamine = 4-amino-4-deoxychorismate + L-glutamate       |
| R-0187 | 0.014   | R-0187 | 0.0083  | R-0187 | tyrosine tRNA synthetase                              | ATP + L-tyrosine + tRNA(Tyr) = AMP + diphosphate + L-tyrosyl-tRNA(Ty     |
| R-0188 | 0.0253  | R-0188 | 0.015   | R-0188 | phenylalanine tRNA synthetase                         | ATP + L-phenylalanine + tRNA(Phe) = AMP + diphosphate + L-phenylal       |
| R-0189 | 0.0395  | R-0189 | 0.0233  | R-0189 | chorismate synthase                                   | 5-enolpyruvylshikimate-3-phosphate = chorismate + phosphate              |
| R-0190 | 0.0395  | R-0190 | 0.0233  | R-0190 | 3-dehydroquininate dehydratase                        | 3-dehydroquininate = 3-dehydroshikimate + H2O                            |
| R-0191 | 0.0001  | R-0191 | 0.0001  | R-0191 | indole-3-glycerol-phosphate synthase                  | 1-(2-carboxyphenylamino)-1-deoxy-D-ribulose-5-phosphate = indole-3-g     |
| R-0192 | 0       | R-0192 | 0       | R-0192 | l-arginine + NAD+ = L-tyrosine + CO2 + NADH + H+      | l-arginine + NAD+ = L-tyrosine + CO2 + NADH + H+                         |
| R-0193 | 0.0126  | R-0193 | 0.0075  | R-0193 | histidinol-phosphate aminotransferase                 | imidazol-acetol-phosphate + L-glutamate = L-histidinol-phosphate + 2-o   |
| R-0194 | 0.0395  | R-0194 | 0.0233  | R-0194 | shikimate kinase                                      | shikimate + ATP = shikimate-3-phosphate + ADP                            |
| R-0195 | 0.0395  | R-0195 | 0.0233  | R-0195 | 3-dehydroquininate synthase                           | 3-deoxy-D-arabino-heptulosonate-7-phosphate = 3-dehydroquininate + ph    |
| R-0196 | 0       | R-0196 | 0       | R-0196 | UDP-glucuronate 5'-epimerase                          | UDP-glucuronate = UDP-L-iduronate                                        |
| R-0197 | 0       | R-0197 | 0       | R-0197 | homoserine O-succinyltransferase                      | succinyl-CoA + L-homoserine = CoA + O-succinyl-L-homoserine              |

|        |         |        |         |        |                                                                |                                                                           |
|--------|---------|--------|---------|--------|----------------------------------------------------------------|---------------------------------------------------------------------------|
| R-0198 | 0       | R-0198 | 0       | R-0198 | 5'-methylthioadenosine phosphorylase                           | (S)-methyl-5'-thioadenosine + phosphate = adenine + (S)-methyl-5-thio-    |
| R-0199 | 0       | R-0199 | 0       | R-0199 | spermidine synthase                                            | (S)-adenosylmethionine + putrescine = (S)-methyl-5'-thioadenosine         |
| R-0200 | 0.0003  | R-0200 | 0.0002  | R-0200 | S-adenosylhomocysteine hydrolase                               | (S)-adenosyl-L-homocysteine + H2O = L-homocysteine + adenosine            |
| R-0201 | 0.0105  | R-0201 | 0.0062  | R-0201 | O-acetylhomoserine sulfhydrylase                               | O-acetyl-L-homoserine + H2S = L-homocysteine + acetate                    |
| R-0202 | 0       | R-0202 | 0       | R-0202 | cystathionine gamma-synthase                                   | O-succinyl-L-homoserine + L-cysteine = L-cystathionine + succinate        |
| R-0203 | 0       | R-0203 | 0       | R-0203 | cystathionine beta-lyase                                       | L-cystathionine + H2O = L-homocysteine + NH3 + pyruvate                   |
| R-0204 | 0.0105  | R-0204 | 0.0062  | R-0204 | methionyl-tRNA synthetase                                      | ATP + L-methionine + tRNA(Met) = AMP + diphosphate + L-methionyl-t        |
| R-0205 | 0.0003  | R-0205 | 0.0002  | R-0205 | methionine adenosyltransferase                                 | ATP + L-methionine + H2O = phosphate + diphosphate + (S)-adenosyl-t       |
| R-0206 | 0.0105  | R-0206 | 0.0062  | R-0206 | homoserine O-acetyltransferase                                 | acetyl-CoA + L-homoserine = CoA + O-acetyl-L-homoserine                   |
| R-0207 | 0.0108  | R-0207 | 0.0064  | R-0207 | homocysteine transmethyase                                     | 5-methyltetrahydrofolate + L-homocysteine = tetrahydrofolate + L-methic   |
| R-0208 | 0.0108  | R-0208 | 0.0064  | R-0208 | 5,10-methylenetetrahydrofolate reductase                       | 5,10-methylenetetrahydrofolate + NADPH + H+ = 5-methyltetrahydrofo        |
| R-0209 | 0       | R-0209 | 0       | R-0209 | 10-formyltetrahydrofolate-L-methionyl-tRNA(Met) N-formyltr     | 10-formyltetrahydrofolate + L-methionyl-tRNA(Met) = tetrahydrofolate +    |
| R-0210 | 0.0479  | R-0210 | 0.0283  | R-0210 | 2,3,4,5-tetrahydropyridine-2-carboxylate N-succinyltransferase | succinyl-CoA + tetrahydrodipicolinate + H2O = CoA + N-succinyl-2-amin     |
| R-0211 | 0.0479  | R-0211 | 0.0283  | R-0211 | N-succinyl-L-diaminopimelate desuccinylase                     | N-succinyl-L,L-2,6-diaminopimelate + H2O = LL-2,6-diaminoheptanedio       |
| R-0212 | 0.0479  | R-0212 | 0.0283  | R-0212 | diaminopimelate decarboxylase                                  | meso-diaminoheptanedioate = L-lysine + CO2                                |
| R-0213 | 0.0479  | R-0213 | 0.0283  | R-0213 | diaminopimelate epimerase                                      | LL-2,6-diaminoheptanedioate = meso-diaminoheptanedioate                   |
| R-0214 | 0.0479  | R-0214 | 0.0283  | R-0214 | dihydrodipicolinate synthase                                   | L-aspartate-4-semialdehyde + pyruvate = dihydrodipicolinate + 2 H2O       |
| R-0215 | 0.0479  | R-0215 | 0.0283  | R-0215 | lysyl tRNA synthetase                                          | ATP + L-lysine + tRNA(Lys) = AMP + diphosphate + L-lysyl-tRNA(Lys)        |
| R-0216 | 0.0479  | R-0216 | 0.0283  | R-0216 | dihydrodipicolinate reductase                                  | dihydrodipicolinate + NADPH + H+ = tetrahydrodipicolinate + NADP+         |
| R-0217 | -0.0533 | R-0217 | -0.0315 | R-0217 | acetylornithine aminotransferase                               | N-acetyl-L-ornithine + 2-oxoglutarate = L-glutamate + N-acetyl-L-glutam   |
| R-0218 | 0       | R-0218 | 0       | R-0218 | succinylornithine transaminase                                 | N2-succinyl-L-ornithine + 2-oxoglutarate = L-glutamate + N2-succinyl-L-   |
| R-0219 | 0.0126  | R-0219 | 0.0075  | R-0219 | histidinal dehydrogenase                                       | histidinal + NAD+ + H2O = L-histidine + NADH + H+                         |
| R-0220 | 0.0126  | R-0220 | 0.0075  | R-0220 | histidinol dehydrogenase                                       | L-histidinol + NAD+ = histidinal + NADH + H+                              |
| R-0221 | 0.0126  | R-0221 | 0.0075  | R-0221 | imidazoleglycerol-phosphate dehydratase                        | D-erythro-imidazole-glycerol-phosphate = imidazol-acetol-phosphate + H    |
| R-0222 | 0.0126  | R-0222 | 0.0075  | R-0222 | histidyl-tRNA synthetase                                       | ATP + L-histidine + tRNA(His) = AMP + diphosphate + L-histidyl-tRNA(H     |
| R-0223 | 0.0126  | R-0223 | 0.0075  | R-0223 | imidazole glycerol phosphate synthase                          | phosphoribuloylformimino-AICAR-phosphate + L-glutamine = L-glutam         |
| R-0224 | 0.0126  | R-0224 | 0.0075  | R-0224 | phosphoribosyl-ATP pyrophosphatase                             | phosphoribosyl-ATP + H2O = phosphoribosyl-AMP + diphosphate               |
| R-0225 | 0.0126  | R-0225 | 0.0075  | R-0225 | phosphoribosyl-AMP cyclohydrolase                              | phosphoribosyl-AMP + H2O = phosphoribosylformimino-AICAR-phosphi          |
| R-0226 | 0.0126  | R-0226 | 0.0075  | R-0226 | N-(5'-phospho-L-ribo-syl-formimino)-5-amino-1-(5'-phosphorib   | phosphoribosylformimino-AICAR-phosphate = phosphoribosylformimin          |
| R-0227 | 0.0126  | R-0227 | 0.0075  | R-0227 | ATP phosphoribosyltransferase                                  | ATP + 5-phosphoribosyl-L-pyrophosphate = phosphoribosyl-ATP + diph        |
| R-0228 | 31.6734 | R-0228 | 32.5431 | R-0228 | oxalyl-CoA decarboxylase                                       | oxalyl-CoA = formyl-CoA + CO2                                             |
| R-0229 | 31.6734 | R-0229 | 32.5431 | R-0229 | formyl-CoA transferase                                         | formyl-CoA + oxalate = formate + oxalyl-CoA                               |
| R-0230 | 0       | R-0230 | 0       | R-0230 | hydroxypyruvate isomerase                                      | hydroxypyruvate = tartronate-semialdehyde                                 |
| R-0231 | -2.1266 | R-0231 | -1.2569 | R-0231 | glyoxylate dehydrogenase                                       | glyoxylate + CoA + NADP+ = oxalyl-CoA + NADPH + H+                        |
| R-0232 | 0       | R-0232 | 0       | R-0232 | phosphoglycolate phosphatase                                   | 2-phosphoglycolate + H2O = glycolate + phosphate                          |
| R-0233 | 0       | R-0233 | 0       | R-0233 | 2-hydroxy-3-oxopropionate reductase (NAD)                      | D-glycerate + NAD+ = tartronate-semialdehyde + NADH + H+                  |
| R-0234 | 0       | R-0234 | 0       | R-0234 | 2-hydroxy-3-oxopropionate reductase (NADP)                     | D-glycerate + NADP+ = tartronate-semialdehyde + NADPH + H+                |
| R-0235 | 0       | R-0235 | 0       | R-0235 | formamide amidohydrolase                                       | formamide + H2O = formate + NH3                                           |
| R-0236 | 0.0003  | R-0236 | 0.0002  | R-0236 | 5-aminolevulinic synthase                                      | succinyl-CoA + glycine = 5-aminolevulinic acid + CoA + CO2                |
| R-0237 | 0.0001  | R-0237 | 0.0001  | R-0237 | porphobilinogen synthase                                       | 2 5-aminolevulinic acid = porphobilinogen + 2 H2O                         |
| R-0238 | 0       | R-0238 | 0       | R-0238 | porphobilinogen deaminase                                      | 4 porphobilinogen + H2O = 4 NH3 + hydroxymethylbilane                     |
| R-0239 | 0       | R-0239 | 0       | R-0239 | uroporphyrinogen III synthase                                  | hydroxymethylbilane + uroporphyrinogen-III + H2O                          |
| R-0240 | 0       | R-0240 | 0       | R-0240 | sarcosine oxidase                                              | sarcosine + O2 + H2O = H2O2 + formaldehyde + glycine                      |
| R-0241 | 0.1552  | R-0241 | 0.0918  | R-0241 | aspartate-semialdehyde dehydrogenase                           | L-aspartyl-4-phosphate + NADPH + H+ = phosphate + L-aspartate-4-se        |
| R-0242 | 0       | R-0242 | 0       | R-0242 | glycine amidinotransferase                                     | glycine + L-arginine = guanidinoacetate + L-ornithine                     |
| R-0243 | 0       | R-0243 | 0       | R-0243 | glycine decarboxylase                                          | H-Gcv-protein-(lipoyl)lysine + glycine = H-protein-S-(aminomethyl)dihydr  |
| R-0244 | 0       | R-0244 | 0       | R-0244 | H-protein-lipamide dehydrogenase                               | H-Gcv-protein-(dihydrolipoyl)lysine + NAD+ + H-Gcv-protein-(lipoyl)lysi   |
| R-0245 | 0       | R-0245 | 0       | R-0245 | H-protein-aminomethyltransferase                               | H-protein-S-(aminomethyl)dihydrolipoyl)lysine + tetrahydrofolate = H-Gcv  |
| R-0249 | 0.0968  | R-0249 | 0.0572  | R-0249 | threonine synthase                                             | O-phospho-L-homoserine + H2O = L-threonine + phosphate                    |
| R-0251 | 0       | R-0251 | 0       | R-0251 | phosphoserine phosphatase (D)                                  | O-phospho-D-serine + H2O = D-serine + phosphate                           |
| R-0252 | 0       | R-0252 | 0       | R-0252 | L-threonine aldolase                                           | L-threonine = glycine + acetaldehyde                                      |
| R-0253 | 0       | R-0253 | 0       | R-0253 | L-allo-threonine aldolase                                      | L-allo-threonine = glycine + acetaldehyde                                 |
| R-0254 | 0       | R-0254 | 0       | R-0254 | phenylserine aldolase                                          | L-threo-3-phenylserine = benzaldehyde + glycine                           |
| R-0255 | 0.039   | R-0255 | 0.023   | R-0255 | threonine deaminase                                            | L-threonine = 2-oxobutanoate + NH3 + H+                                   |
| R-0256 | 0       | R-0256 | 0       | R-0256 | L-serine deaminase                                             | L-serine = pyruvate + NH3                                                 |
| R-0257 | 0.1073  | R-0257 | 0.0634  | R-0257 | homoserine dehydrogenase                                       | L-aspartate-4-semialdehyde + NADPH + H+ = L-homoserine + NADP+            |
| R-0258 | 0.0573  | R-0258 | 0.0338  | R-0258 | threonine tRNA synthetase                                      | ATP + L-threonine + tRNA(Thr) = AMP + diphosphate + L-threonyl-tRNA       |
| R-0259 | 0.0577  | R-0259 | 0.0341  | R-0259 | serine tRNA synthetase                                         | ATP + L-serine + tRNA(Ser) = AMP + diphosphate + L-seryl-tRNA(Ser)        |
| R-0260 | 0.0968  | R-0260 | 0.0572  | R-0260 | homoserine kinase                                              | L-homoserine + ATP = O-phospho-L-homoserine + ADP                         |
| R-0261 | 0.1552  | R-0261 | 0.0918  | R-0261 | aspartokinase                                                  | L-aspartate + ATP = L-aspartyl-4-phosphate + ADP                          |
| R-0262 | 0.2182  | R-0262 | 0.129   | R-0262 | glycine tRNA synthetase                                        | ATP + glycine + tRNA(Gly) = AMP + diphosphate + glycy-tRNA(Gly)           |
| R-0263 | 0.3288  | R-0263 | 0.1943  | R-0263 | D-3-phosphoglycerate dehydrogenase                             | 3-phospho-D-glycerate + NAD+ = 3-phospho-hydroxypyruvate + NADH           |
| R-0264 | 0.3288  | R-0264 | 0.1943  | R-0264 | phosphoserine aminotransferase                                 | L-glutamate + 3-phospho-hydroxypyruvate = 3-phospho-L-serine + 2-ox       |
| R-0265 | 0.3288  | R-0265 | 0.1943  | R-0265 | phosphoserine phosphatase                                      | 3-phospho-L-serine + H2O = L-serine + phosphate                           |
| R-0266 | 0       | R-0266 | 0       | R-0266 | phosphohydroxythreonine aminotransferase                       | 2-oxo-3-hydroxy-4-phosphobutanoate + L-glutamate = 4-(phosphonoxy         |
| R-0267 | 0       | R-0267 | 0       | R-0267 | a-ketoglutarate reductase                                      | 2-hydroxyglutarate + NAD+ + 2-oxoglutarate = NADH + H+                    |
| R-0268 | 0.015   | R-0268 | 0.0089  | R-0268 | glycerol-3-phosphate dehydrogenase                             | glycerone-phosphate + NADPH + H+ = sn-glycerol-3-phosphate + NADP+        |
| R-0269 | 0       | R-0269 | 0       | R-0269 | glycerol-3-phosphate dehydrogenase                             | glycerone-phosphate + NADH + H+ = sn-glycerol-3-phosphate + NADP+         |
| R-0270 | 0       | R-0270 | 0       | R-0270 | ethanolamine ammonia-lyase                                     | ethanolamine + acetaldehyde + NH3                                         |
| R-0272 | 0.0006  | R-0272 | 0.0004  | R-0272 | CDP-diacylglycerol synthetase (n-16:0)                         | CTP + 1,2-dihexadecanoyl-sn-glycerol-3-phosphate = diphosphate + CC       |
| R-0273 | 0.0006  | R-0273 | 0.0004  | R-0273 | CDP-diacylglycerol synthetase (n-16:1)                         | CTP + 1,2-dihexadec-9-enoyl-sn-glycerol-3-phosphate = diphosphate + A     |
| R-0274 | 0.0006  | R-0274 | 0.0004  | R-0274 | CDP-diacylglycerol synthetase (n-18:0)                         | CTP + 1,2-dioctadecanoyl-sn-glycerol-3-phosphate = diphosphate + CD       |
| R-0275 | 0.0097  | R-0275 | 0.0057  | R-0275 | CDP-diacylglycerol synthetase (n-18:1)                         | CTP + 1,2-dioctadec-9-enoyl-sn-glycerol-3-phosphate = diphosphate + (     |
| R-0276 | 0       | R-0276 | 0       | R-0276 | phosphatidylethanolamine-N-methyltransferase (n-16:0)          | (S)-adenosyl-L-methionine + phosphatidylethanolamine(dihexadecanoyl       |
| R-0277 | 0       | R-0277 | 0       | R-0277 | phosphatidylethanolamine-N-methyltransferase (n-16:1)          | (S)-adenosyl-L-methionine + phosphatidylethanolamine(dihexadec-9-en       |
| R-0278 | 0       | R-0278 | 0       | R-0278 | phosphatidylethanolamine-N-methyltransferase (n-18:0)          | (S)-adenosyl-L-methionine + phosphatidylethanolamine(dioctadecanoyl)      |
| R-0279 | 0       | R-0279 | 0       | R-0279 | phosphatidylethanolamine-N-methyltransferase (n-18:1)          | (S)-adenosyl-L-methionine + phosphatidylethanolamine(dioctadec-9-enc      |
| R-0280 | 0.0004  | R-0280 | 0.0002  | R-0280 | phosphatidylserine decarboxylase (n-16:0)                      | phosphatidyl-L-serine(dihexadecanoyl) = phosphatidylethanolamine(dih      |
| R-0281 | 0.0004  | R-0281 | 0.0003  | R-0281 | phosphatidylserine decarboxylase (n-16:1)                      | phosphatidyl-L-serine(dihexadec-9-enoyl) = phosphatidylethanolamine(d     |
| R-0282 | 0.0004  | R-0282 | 0.0002  | R-0282 | phosphatidylserine decarboxylase (n-18:0)                      | phosphatidyl-L-serine(dioctadecanoyl) = phosphatidylethanolamine(dio      |
| R-0283 | 0.0006  | R-0283 | 0.0039  | R-0283 | phosphatidylserine decarboxylase (n-18:1)                      | phosphatidyl-L-serine(dioctadec-9-enoyl) = phosphatidylethanolamine(d     |
| R-0284 | 0.0004  | R-0284 | 0.0003  | R-0284 | phosphatidylserine synthase (n-16:0)                           | CDP-1,2-dihexadecanoyl-glycerol + L-serine = CMP + phosphatidyl-L-se      |
| R-0285 | 0.0004  | R-0285 | 0.0003  | R-0285 | phosphatidylserine synthase (n-16:1)                           | CDP-1,2-dihexadec-9-enoyl-glycerol + L-serine = CMP + phosphatidyl-L      |
| R-0286 | 0.0004  | R-0286 | 0.0002  | R-0286 | phosphatidylserine synthase (n-18:0)                           | CDP-1,2-dioctadecanoyl-glycerol + L-serine = CMP + phosphatidyl-L-se      |
| R-0287 | 0.0068  | R-0287 | 0.004   | R-0287 | phosphatidylserine synthase (n-18:1)                           | CDP-1,2-dioctadec-9-enoyl-glycerol + L-serine = CMP + phosphatidyl-L      |
| R-0289 | 0.0002  | R-0289 | 0.0001  | R-0289 | phosphatidylglycerophosphate synthetase (n-16:0)               | CDP-1,2-dihexadecanoyl-glycerol + sn-glycerol-3-phosphate = CMP + p       |
| R-0290 | 0.0002  | R-0290 | 0.0001  | R-0290 | phosphatidylglycerophosphate synthetase (n-16:1)               | CDP-1,2-dihexadec-9-enoyl-glycerol + sn-glycerol-3-phosphate = CMP +      |
| R-0291 | 0.0002  | R-0291 | 0.0001  | R-0291 | phosphatidylglycerophosphate synthetase (n-18:0)               | CDP-1,2-dioctadecanoyl-glycerol + sn-glycerol-3-phosphate = CMP + p       |
| R-0292 | 0.0029  | R-0292 | 0.0017  | R-0292 | phosphatidylglycerophosphate synthetase (n-18:1)               | CDP-1,2-dioctadec-9-enoyl-glycerol + sn-glycerol-3-phosphate = CMP +      |
| R-0294 | 0       | R-0294 | 0       | R-0294 | sn-Glycerol-3-phosphocholine glycerophosphohydrolase           | sn-glycerol-3-phosphocholine + H2O = sn-glycerol-3-phosphate + cholin     |
| R-0295 | 0       | R-0295 | 0       | R-0295 | sn-Glycerol-3-phosphoethanolamine glycerophosphohydrolase      | sn-glycerol-3-phosphoethanolamine + H2O = sn-glycerol-3-phosphate +       |
| R-0298 | 0       | R-0298 | 0       | R-0298 | lysophospholipase C1 (n-16:0)                                  | 1-hexadecanoyl-sn-glycerol-3-phosphocholine + H2O = sn-glycerol-3-phc     |
| R-0299 | 0       | R-0299 | 0       | R-0299 | lysophospholipase C2 (n-16:0)                                  | 2-hexadecanoyl-sn-glycerol-3-phosphocholine + H2O = sn-glycerol-3-phc     |
| R-0300 | 0       | R-0300 | 0       | R-0300 | lysophospholipase C1 (n-16:1)                                  | 1-hexadec-9-enoyl-sn-glycerol-3-phosphocholine + H2O = sn-glycerol-3-     |
| R-0301 | 0       | R-0301 | 0       | R-0301 | lysophospholipase C2 (n-16:1)                                  | 2-hexadec-9-enoyl-sn-glycerol-3-phosphocholine + H2O = sn-glycerol-3-     |
| R-0302 | 0       | R-0302 | 0       | R-0302 | lysophospholipase C1 (n-18:0)                                  | 1-octadecanoyl-sn-glycerol-3-phosphocholine + H2O = sn-glycerol-3-ph      |
| R-0303 | 0       | R-0303 | 0       | R-0303 | lysophospholipase C2 (n-18:0)                                  | 2-octadecanoyl-sn-glycerol-3-phosphocholine + H2O = sn-glycerol-3-ph      |
| R-0304 | 0       | R-0304 | 0       | R-0304 | lysophospholipase C1 (n-18:1)                                  | 1-octadec-9-enoyl-sn-glycerol-3-phosphocholine + H2O = sn-glycerol-3-p    |
| R-0305 | 0       | R-0305 | 0       | R-0305 | lysophospholipase C2 (n-18:1)                                  | 2-octadec-9-enoyl-sn-glycerol-3-phosphocholine + H2O = sn-glycerol-3-p    |
| R-0308 | 0       | R-0308 | 0       | R-0308 | lysophospholipase E1 (n-16:0)                                  | 1-hexadecanoyl-sn-glycerol-3-phosphoethanolamine + H2O = sn-glycer        |
| R-0309 | 0       | R-0309 | 0       | R-0309 | lysophospholipase E2 (n-16:0)                                  | 2-hexadecanoyl-sn-glycerol-3-phosphoethanolamine + H2O = sn-glycer        |
| R-0310 | 0       | R-0310 | 0       | R-0310 | lysophospholipase E1 (n-16:1)                                  | 1-hexadec-9-enoyl-sn-glycerol-3-phosphoethanolamine + H2O = sn-glyc       |
| R-0311 | 0       | R-0311 | 0       | R-0311 | lysophospholipase E2 (n-16:1)                                  | 2-hexadec-9-enoyl-sn-glycerol-3-phosphoethanolamine + H2O = sn-glyc       |
| R-0312 | 0       | R-0312 | 0       | R-0312 | lysophospholipase E1 (n-18:0)                                  | 1-octadecanoyl-sn-glycerol-3-phosphoethanolamine + H2O = sn-glycer        |
| R-0313 | 0       | R-0313 | 0       | R-0313 | lysophospholipase E2 (n-18:0)                                  | 2-octadecanoyl-sn-glycerol-3-phosphoethanolamine + H2O = sn-glycer        |
| R-0314 | 0       | R-0314 | 0       | R-0314 | lysophospholipase E1 (n-18:1)                                  | 1-octadec-9-enoyl-sn-glycerol-3-phosphoethanolamine + H2O = sn-glyc       |
| R-0315 | 0       | R-0315 | 0       | R-0315 | lysophospholipase E2 (n-18:1)                                  | 2-octadec-9-enoyl-sn-glycerol-3-phosphoethanolamine + H2O = sn-glyc       |
| R-0317 | 0       | R-0317 | 0       | R-0317 | 2-acylglycerophosphoethanolamine acyltransferase (n-16:0)      | hexadecanoyl-[acyl-carrier-protein] + 2-hexadecanoyl-sn-glycerol-3-phos   |
| R-0318 | 0       | R-0318 | 0       | R-0318 | 2-acylglycerophosphoethanolamine acyltransferase (n-16:1)      | hexadec-9-enoyl-[acyl-carrier-protein] + 2-hexadec-9-enoyl-sn-glycerol-3  |
| R-0319 | 0       | R-0319 | 0       | R-0319 | 2-acylglycerophosphoethanolamine acyltransferase (n-18:0)      | octadecanoyl-[acyl-carrier-protein] + 2-octadecanoyl-sn-glycerol-3-phos   |
| R-0320 | 0       | R-0320 | 0       | R-0320 | 2-acylglycerophosphoethanolamine acyltransferase (n-18:1)      | octadec-9-enoyl-[acyl-carrier-protein] + 2-octadec-9-enoyl-sn-glycerol-3- |
| R-0322 | 0.0012  | R-0322 | 0.0007  | R-0322 | acyl-acyl carrier protein synthetase (n-16:0)                  | ATP + hexadecanoate + [acyl-carrier-protein] = AMP + diphosphate + h      |
| R-0323 | 0       | R-0323 | 0       | R-0323 | acyl-acyl carrier protein synthetase (n-16:1)                  | ATP + 9-hexadecenoate + [acyl-carrier-protein] = AMP + diphosphate +      |
| R-0324 | 0.0012  | R-0324 | 0.0007  | R-0324 | acyl-acyl carrier protein synthetase (n-18:0)                  | ATP + octadecanoate + [acyl-carrier-protein] = AMP + diphosphate + oc     |
| R-0325 | 0       | R-0325 | 0       | R-0325 | acyl-acyl carrier protein synthetase (n-18:1)                  | ATP + 9-octadecenoate + [acyl-carrier-protein] = AMP + diphosphate + c    |
| R-0327 | 0       | R-0327 | 0       | R-0327 | diacylglycerol kinase (n-16:0)                                 | ATP + 1,2-dihexadecanoyl-glycerol = ADP + 1,2-dihexadecanoyl-sn-glyc      |
| R-0328 | 0       | R-0328 | 0       | R-0328 | diacylglycerol kinase (n-16:1)                                 | ATP + 1,2-dihexadec-9-enoyl-glycerol = ADP + 1,2-dihexadec-9-enoyl-s      |
| R-0329 | 0       | R-0329 | 0       | R-0329 | diacylglycerol kinase (n-18:0)                                 | ATP + 1,2-dioctadecanoyl-glycerol = ADP + 1,2-dioctadecanoyl-sn-glyc      |
| R-0330 | 0       | R-0330 | 0       | R-0330 | diacylglycerol kinase (n-18:1)                                 | ATP + 1,2-dioctadec-9-enoyl-glycerol = ADP + 1,2-dioctadec-9-enoyl-s      |
| R-0331 | 0       | R-0331 | 0       | R-0331 | dihydroxyacetone kinase                                        | ATP + glyceraldehyde = ADP + glyceraldehyde-phosphate                     |
| R-0332 | 0       | R-0332 | 0       | R-0332 | glycerol kinase                                                | ATP + glycerol = ADP + sn-glycerol-3-phosphate                            |
| R-0334 | 0.0006  | R-0334 | 0.0004  | R-0334 | lysophosphatidic acid acyltransferase (n-16:0)                 | hexadecanoyl-[acyl-carrier-protein] + 1-hexadecanoyl-sn-glycerol-3-phos   |
| R-0335 | 0.0006  | R-0335 | 0.0004  | R-0335 | lysophosphatidic acid acyltransferase (n-16:1)                 | hexadec-9-enoyl-[acyl-carrier-protein] + 1-hexadec-9-enoyl-sn-glycerol    |

[illegible]

|        |         |        |         |        |                                                               |                                                                           |
|--------|---------|--------|---------|--------|---------------------------------------------------------------|---------------------------------------------------------------------------|
| R-0462 | 0.0028  | R-0462 | 0.0017  | R-0462 | dUDP kinase                                                   | dUDP + ATP = dUTP + ADP                                                   |
| R-0463 | 0.0062  | R-0463 | 0.0037  | R-0463 | dCDP kinase                                                   | dCDP + ATP = dCTP + ADP                                                   |
| R-0464 | 0.1164  | R-0464 | 0.0688  | R-0464 | dTDP kinase                                                   | dTDP + ATP = dTTP + ADP                                                   |
| R-0465 | 0.0028  | R-0465 | 0.0017  | R-0465 | dADP kinase                                                   | dADP + ATP = dATP + ADP                                                   |
| R-0466 | 0.0062  | R-0466 | 0.0037  | R-0466 | dGDP kinase                                                   | dGDP + ATP = dGTP + ADP                                                   |
| R-0467 | 0.045   | R-0467 | 0.0266  | R-0467 | GDP kinase                                                    | GDP + ATP = GTP + ADP                                                     |
| R-0469 | 0.0224  | R-0469 | 0.0132  | R-0469 | CTP synthetase                                                | ATP + UTP + L-glutamine + H2O = ADP + phosphate + CTP + L-glut            |
| R-0470 | 0.0028  | R-0470 | 0.0017  | R-0470 | UDP reductase                                                 | UDP + reduced-thioredoxin = dUDP + oxidized-thioredoxin + H2O             |
| R-0471 | 0.0062  | R-0471 | 0.0037  | R-0471 | CDP reductase                                                 | CDP + reduced-thioredoxin = dCDP + oxidized-thioredoxin + H2O             |
| R-0472 | 0.0028  | R-0472 | 0.0017  | R-0472 | ADP reductase                                                 | ADP + reduced-thioredoxin = dADP + oxidized-thioredoxin + H2O             |
| R-0474 | 0.0062  | R-0474 | 0.0037  | R-0474 | GDP reductase                                                 | GDP + reduced-thioredoxin = dGDP + oxidized-thioredoxin + H2O             |
| R-0475 | 0.0316  | R-0475 | 0.0187  | R-0475 | thioredoxin reductase                                         | oxidized-thioredoxin + NADPH + H+ = reduced-thioredoxin + NADP+           |
| R-0476 | 3.4191  | R-0476 | 2.0209  | R-0476 | adenylate kinase                                              | AMP + ATP = 2 ADP                                                         |
| R-0477 | 0.0327  | R-0477 | 0.0193  | R-0477 | dihydroorotate                                                | N-carbamoyl-L-aspartate = dihydroorotate + H2O                            |
| R-0478 | 0.0327  | R-0478 | 0.0193  | R-0478 | dihydroorotate dehydrogenase                                  | dihydroorotate + O2 = orotate + H2O2                                      |
| R-0479 | 0.0327  | R-0479 | 0.0193  | R-0479 | orotate phosphoribosyltransferase                             | 5-phosphoribosyl-1-pyrophosphate + orotate = orotidine-5'-phosphate +     |
| R-0480 | 0.0327  | R-0480 | 0.0193  | R-0480 | orotidine 5'-phosphate decarboxylase                          | orotidine-5'-phosphate = CO2 + UMP                                        |
| R-0481 | 0.0151  | R-0481 | 0.0089  | R-0481 | cytidylate kinase                                             | CMP + ATP = CDP + ADP                                                     |
| R-0482 | 0.0327  | R-0482 | 0.0193  | R-0482 | uridylyate kinase                                             | UMP + ATP = UDP + ADP                                                     |
| R-0483 | 0       | R-0483 | 0       | R-0483 | dCTP deaminase                                                | dCTP + H2O = NH3 + dUTP                                                   |
| R-0484 | 0.0028  | R-0484 | 0.0017  | R-0484 | thymidylate synthetase                                        | dUMP + 5,10-methylenetetrahydrofolate = dTMP + 7,8-dihydrofolate          |
| R-0485 | 0.0029  | R-0485 | 0.0017  | R-0485 | dihydrofolate reductase                                       | NADPH + 7,8-dihydrofolate + H+ = NADP+ + tetrahydrofolate                 |
| R-0486 | 0.0028  | R-0486 | 0.0017  | R-0486 | deoxyuridine 5'-triphosphate nucleotidohydrolase              | dUTP + H2O = dUMP + diphosphate                                           |
| R-0487 | 0       | R-0487 | 0       | R-0487 | nucleoside triphosphate pyrophosphohydrolase (ATP)            | ATP + H2O = AMP + diphosphate                                             |
| R-0489 | 0       | R-0489 | 0       | R-0489 | nucleoside triphosphate pyrophosphohydrolase (GTP)            | GTP + H2O = GMP + diphosphate                                             |
| R-0490 | 0       | R-0490 | 0       | R-0490 | nucleoside triphosphate pyrophosphohydrolase (CTP)            | CTP + H2O = CMP + diphosphate                                             |
| R-0491 | 0       | R-0491 | 0       | R-0491 | nucleoside triphosphate pyrophosphohydrolase (UTP)            | UTP + H2O = UMP + diphosphate                                             |
| R-0492 | 0       | R-0492 | 0       | R-0492 | 5'-nucleotidase (GMP)                                         | GMP + H2O = guanosine + phosphate                                         |
| R-0493 | -0.0003 | R-0493 | -0.0002 | R-0493 | 5'-nucleotidase (AMP)                                         | AMP + H2O = adenosine + phosphate                                         |
| R-0494 | 0       | R-0494 | 0       | R-0494 | 5'-nucleotidase (IMP)                                         | IMP + H2O = inosine + phosphate                                           |
| R-0495 | 0       | R-0495 | 0.0133  | R-0495 | 5'-nucleotidase (XMP)                                         | XMP + H2O = xanthosine + phosphate                                        |
| R-0496 | 0       | R-0496 | 0       | R-0496 | GTP cyclohydrolase I                                          | GTP + H2O = formate + 7,8-dihydroneopterin-triphosphate                   |
| R-0497 | 0       | R-0497 | 0       | R-0497 | dihydroneopterin triphosphate pyrophosphohydrolase            | 7,8-dihydroneopterin-triphosphate + H2O = dihydroneopterin-phosphate      |
| R-0498 | 0       | R-0498 | 0       | R-0498 | dihydroneopterin aldolase                                     | 7,8-dihydro-D-neopterin + glycylaldehyde + 6-hydroxymethyl-7,8-dihydr     |
| R-0499 | 0       | R-0499 | 0       | R-0499 | dihydroneopterin monophosphate dephosphorylase                | dihydroneopterin-phosphate + H2O = 7,8-dihydro-D-neopterin + phosph       |
| R-0500 | 0       | R-0500 | 0       | R-0500 | 2-amino-4-hydroxy-6-hydroxymethyl-dihydropteridine pyrophosph | 6-hydroxymethyl-7,8-dihydropterin + ATP = 6-hydroxymethyl-dihydroptei     |
| R-0501 | 0       | R-0501 | 0       | R-0501 | dihydropterolate synthase                                     | p-aminobenzoate + 6-hydroxymethyl-dihydropterin-diphosphate = diphos      |
| R-0502 | 0       | R-0502 | 0       | R-0502 | folypolyglutamate synthase 1                                  | L-glutamate + ATP + methylene-tetrahydropteroyl-[gamma-Glu(n)] = AD       |
| R-0503 | 0       | R-0503 | 0       | R-0503 | dihydrofolate synthetase 1                                    | L-glutamate + ATP + 7,8-dihydropterolate = phosphate + ADP + 7,8-dihy     |
| R-0504 | 0       | R-0504 | 0       | R-0504 | folypolyglutamate synthase 2                                  | L-glutamate + ATP + 10-formyl-tetrahydropteroyl-[gamma-Glu(n)] = ADF      |
| R-0505 | 0       | R-0505 | 0       | R-0505 | folypolyglutamate synthase 3                                  | L-glutamate + ATP + tetrahydropteroyl-[gamma-Glu(n)] = ADP + phosph       |
| R-0506 | 0.0001  | R-0506 | 0       | R-0506 | dihydrodihydroneopterin reductase                             | NADPH + 7,8-dihydrodihydroneopterin + H+ = NADP+ + tetrahydrodihydrone    |
| R-0507 | 0       | R-0507 | 0.0004  | R-0507 | 1-deoxy-D-xylulose 5-phosphate reductoisomerase               | 1-deoxy-D-xylulose-5-phosphate + NADPH + H+ = 2-C-methyl-D-erythrit       |
| R-0508 | 0.0007  | R-0508 | 0.0004  | R-0508 | 4-diphosphocytidyl-2C-methyl-D-erythritol synthase            | 2-C-methyl-D-erythritol-4-phosphate + CTP = 4-(cytidine-5'-diphospho)-    |
| R-0509 | 0.0007  | R-0509 | 0.0004  | R-0509 | 2C-methyl-D-erythritol 2,4-cyclodiphosphate synthase          | 2-phospho-4-(cytidine-5'-diphospho)-2-C-methyl-D-erythritol = 2-C-meth    |
| R-0510 | 0.0007  | R-0510 | 0.0004  | R-0510 | 4-diphosphocytidyl-2-C-methyl-D-erythritol kinase             | 4-(cytidine-5'-diphospho)-2-C-methyl-D-erythritol + ATP = 2-phospho-4-(   |
| R-0511 | 0.0007  | R-0511 | 0.0004  | R-0511 | 1-hydroxy-2-methyl-2-(E)-butenyl-4-diphosphate synthase       | 2-C-methyl-D-erythritol-2,4-cyclodiphosphate + 2 reduced-ferredoxin + 2   |
| R-0512 | 0.0002  | R-0512 | 0.0001  | R-0512 | 1-hydroxy-2-methyl-2-(E)-butenyl-4-diphosphate reductase 1    | 1-hydroxy-2-methyl-2-(E)-butenyl-4-diphosphate + NADPH + H+ = dimel       |
| R-0513 | 0.0005  | R-0513 | 0.0003  | R-0513 | 1-hydroxy-2-methyl-2-(E)-butenyl-4-diphosphate reductase 2    | 1-hydroxy-2-methyl-2-(E)-butenyl-4-diphosphate + NADPH + H+ = isope       |
| R-0514 | 0.0002  | R-0514 | 0.0001  | R-0514 | geranyl diphosphate synthase                                  | dimethylallyl-diphosphate + isopentenyl-diphosphate = diphosphate + ge    |
| R-0515 | 0.0002  | R-0515 | 0.0001  | R-0515 | farnesyl-diphosphate synthase                                 | geranyl-diphosphate + isopentenyl-diphosphate = diphosphate + all-trans   |
| R-0516 | 0.0002  | R-0516 | 0.0001  | R-0516 | geranylgeranyl pyrophosphate synthase                         | isopentenyl-diphosphate + all-trans-farnesyl-diphosphate = all-trans-ger  |
| R-0517 | 0.0001  | R-0517 | 0       | R-0517 | phytoene synthase                                             | 2 all-trans-geranyl-geranyl-diphosphate = prephytoene-diphosphate + di    |
| R-0518 | 0.0001  | R-0518 | 0       | R-0518 | phytoene synthase 2                                           | prephytoene-diphosphate = phytoene + diphosphate                          |
| R-0519 | 0.0001  | R-0519 | 0       | R-0519 | phytoene dehydrogenase 1                                      | phytoene + reduced-electron-acceptor + O2 = phytolfluene + oxidized-eh    |
| R-0520 | 0.0001  | R-0520 | 0       | R-0520 | phytoene dehydrogenase 2                                      | phytofluene + reduced-electron-acceptor + O2 = zeta-carotene + oxidize    |
| R-0521 | 0.0001  | R-0521 | 0       | R-0521 | zeta-carotene desaturase 1                                    | zeta-carotene + reduced-electron-acceptor + O2 = neurosporene + oxid      |
| R-0522 | 0.0001  | R-0522 | 0       | R-0522 | zeta-carotene desaturase 2                                    | neurosporene + reduced-electron-acceptor + O2 = trans-lycopene + ox       |
| R-0523 | 0.0141  | R-0523 | 0.0083  | R-0523 | prephenate dehydrogenase                                      | prephenate + NAD+ = 4-hydroxyphenylpyruvate + CO2 + NADH + H+             |
| R-0524 | 0.0253  | R-0524 | 0.015   | R-0524 | aromatic-amino-acid transaminase (PHE)                        | phenylpyruvate + L-glutamate = L-phenylalanine + 2-oxoglutarate           |
| R-0525 | 0.0141  | R-0525 | 0.0083  | R-0525 | aromatic-amino-acid transaminase (TYR)                        | 4-hydroxyphenylpyruvate + L-glutamate = L-tyrosine + 2-oxoglutarate       |
| R-0526 | 0.0066  | R-0526 | 0.1221  | R-0526 | D-alanine aminotransferase                                    | pyruvate + D-glutamate = D-alanine + 2-oxoglutarate                       |
| R-0527 | 0.0126  | R-0527 | 0.0075  | R-0527 | histidinol-phosphate                                          | L-histidinol-phosphate + H2O = L-histidinol + phosphate                   |
| R-0529 | 0.0006  | R-0529 | 0.0004  | R-0529 | acyl phosphate synthase (n-16:0)                              | hexadecanoyl-[acyl-carrier-protein] + phosphate = hexadecanoyl-phosph     |
| R-0530 | 0.0006  | R-0530 | 0.0004  | R-0530 | acyl phosphate synthase (n-16:1)                              | hexadec-9-enoyl-[acyl-carrier-protein] + phosphate = hexadec-9-enoyl-p    |
| R-0531 | 0.0006  | R-0531 | 0.0004  | R-0531 | acyl phosphate synthase (n-18:0)                              | octadecanoyl-[acyl-carrier-protein] + phosphate = octadecanoyl-phosph     |
| R-0532 | 0.0097  | R-0532 | 0.0057  | R-0532 | acyl phosphate synthase (n-18:1)                              | octadec-9-enoyl-[acyl-carrier-protein] + phosphate = octadec-9-enoyl-ph   |
| R-0534 | 0.0006  | R-0534 | 0.0004  | R-0534 | glycerol-3-phosphate synthase (n-16:0)                        | sn-glycerol-3-phosphate + hexadecanoyl-phosphate = 1-hexadecanoyl-s       |
| R-0535 | 0.0006  | R-0535 | 0.0004  | R-0535 | glycerol-3-phosphate synthase (n-16:1)                        | sn-glycerol-3-phosphate + hexadec-9-enoyl-phosphate = 1-hexadec-9-e       |
| R-0536 | 0.0006  | R-0536 | 0.0004  | R-0536 | glycerol-3-phosphate synthase (n-18:0)                        | sn-glycerol-3-phosphate + octadecanoyl-phosphate = 1-octadecanoyl-sr      |
| R-0537 | 0.0097  | R-0537 | 0.0057  | R-0537 | glycerol-3-phosphate synthase (n-18:1)                        | sn-glycerol-3-phosphate + octadec-9-enoyl-phosphate = 1-octadec-9-en      |
| R-0538 | 0.0028  | R-0538 | 0.0017  | R-0538 | thymidylate kinase                                            | dTMP + ATP = dTDP + ADP                                                   |
| R-0539 | 0       | R-0539 | 0       | R-0539 | adenylate kinase 2                                            | dAMP + ATP = ADP + dADP                                                   |
| R-0540 | 0.0516  | R-0540 | 0.0305  | R-0540 | glutamyl-tRNA amidotransferase                                | ATP + L-glutamyl-tRNA(Gln) + L-glutamine + H2O = ADP + phosphate +        |
| R-0541 | 0.0516  | R-0541 | 0.0305  | R-0541 | nondiscriminating glutamyl-tRNA synthetase                    | ATP + L-glutamate + tRNA(Gln) = AMP + diphosphate + L-glutamyl-tRN        |
| R-0542 | 0.0465  | R-0542 | 0.0275  | R-0542 | nondiscriminating aspartate tRNA synthetase                   | ATP + L-aspartate + tRNA(Asn) = AMP + diphosphate + L-aspartyl-tRNA/      |
| R-0543 | 0.0465  | R-0543 | 0.0275  | R-0543 | aspartyl-tRNA amidotransferase                                | ATP + L-aspartyl-tRNA(Asn) + L-glutamine + H2O = ADP + phosphate +        |
| R-0544 | 0.0581  | R-0544 | 0.0344  | R-0544 | gamma-glutamyl kinase                                         | L-glutamate + ATP = L-glutamate-5-phosphate + ADP                         |
| R-0545 | 0.0581  | R-0545 | 0.0344  | R-0545 | L-glutamate-5-semialdehyde dehydrogenase                      | L-glutamate-5-phosphate + NADPH + H+ = L-glutamate-gamma-semialk          |
| R-0546 | 0.0581  | R-0546 | 0.0344  | R-0546 | L-glutamate-gamma-semialdehyde (cyclase dehydratase)          | L-glutamate-gamma-semialdehyde = (S)-1-pyrroline-5-carboxylate + H2O      |
| R-0547 | 0       | R-0547 | 0       | R-0547 | N-acetylglutamate synthase                                    | L-glutamate + acetyl-CoA = N-acetyl-L-glutamate + CoA                     |
| R-0548 | 0.0533  | R-0548 | 0.0315  | R-0548 | acetylglutamate kinase                                        | N-acetyl-L-glutamate + ATP = N-acetylglutamyl-phosphate + ADP             |
| R-0549 | 0.0533  | R-0549 | 0.0315  | R-0549 | N-acetylglutamyl-phosphate reductase                          | N-acetylglutamyl-phosphate + NADPH + H+ = N-acetyl-L-glutamate-5-sr       |
| R-0550 | 0       | R-0550 | 0       | R-0550 | acetylornithine deacetylase                                   | N-acetyl-L-ornithine + H2O = L-ornithine + acetate                        |
| R-0551 | 0.0533  | R-0551 | 0.0315  | R-0551 | glutamate N-acetyltransferase                                 | L-glutamate + N-acetyl-L-ornithine = N-acetyl-L-glutamate + L-ornithine   |
| R-0552 | 0       | R-0552 | 0       | R-0552 | methylation                                                   | (S)-adenosyl-L-methionine + demethylated-methyl-acceptor = (S)-adeno      |
| R-0553 | 0.0001  | R-0553 | 0.0001  | R-0553 | tryptophanyl tRNA synthetase                                  | ATP + L-tryptophan + tRNA(Trp) = AMP + diphosphate + L-tryptophyl-tR      |
| R-0554 | 0       | R-0554 | 0       | R-0554 | phosphoglucose isomerase 2                                    | b-D-glucose-6-phosphate = D-fructose-6-phosphate                          |
| R-0555 | 0       | R-0555 | 0       | R-0555 | glucokinase 2                                                 | ATP + b-D-glucose = ADP + b-D-glucose-6-phosphate                         |
| R-0556 | 0       | R-0556 | 0       | R-0556 | 2'-(5'-triphosphoribosyl)-3'-dephosphocoenzyme-A synthase     | dephospho-CoA + ATP = 2'-(5-triphosphoribosyl)-3'-dephospho-CoA + a       |
| R-0557 | 0       | R-0557 | 0       | R-0557 | phosphoribosyl-dephospho-CoA transferase                      | 2'-(5-triphosphoribosyl)-3'-dephospho-CoA + malonate-decarboxylase-a      |
| R-0558 | 0       | R-0558 | 0       | R-0558 | isoquinoline 1-oxidoreductase                                 | isoquinoline + oxidized-electron-acceptor + H2O = isoquinolinol-(12H)-one |
| R-0559 | 0       | R-0559 | 0       | R-0559 | polysulphide reductase                                        | Sn(2)2- + reduced-electron-acceptor = Sn(1-12)2- + H2S + oxidized-electro |
| R-0560 | 0.0343  | R-0560 | 0.0203  | R-0560 | potassium-transporting ATPase                                 | K(p) + H2O + ATP = K+ + phosphate + ADP                                   |
| R-0561 | 0       | R-0561 | 0       | R-0561 | myo-inositol-1-phosphate synthase                             | b-D-glucose-6-phosphate = D-myo-inositol-3-monophosphate                  |
| R-0562 | 0       | R-0562 | 0       | R-0562 | pyridoxamine-5'-phosphate oxidase                             | pyridoxamine-5'-phosphate + O2 + H2O = H2O2 + NH3 + pyridoxal-5'-pi       |
| R-0563 | 0       | R-0563 | 0       | R-0563 | pyridoxine-5'-phosphate oxidase                               | pyridoxine-5'-phosphate + O2 = H2O2 + pyridoxal-5'-phosphate              |
| R-0565 | 0       | R-0565 | 0       | R-0565 | 3-deoxy-D-manno-oculosonate cytidyltransferase                | 3-deoxy-D-manno-oculosonate + CTP = CMP-3-deoxy-D-manno-oculo             |
| R-0566 | 0       | R-0566 | 0       | R-0566 | 3-deoxy-8-phosphocytulonate synthase                          | D-arabinose-5-phosphate + phosphoenolpyruvate + H2O = 3-deoxy-D-n         |
| R-0567 | 0       | R-0567 | 0       | R-0567 | 3-deoxy-D-manno-oculosonate-8-phosphate phosphatase           | 3-deoxy-D-manno-oculosonate-8-P + H2O = 3-deoxy-D-manno-oculos            |
| R-0568 | 0       | R-0568 | 0       | R-0568 | D-arabinose-5-phosphate isomerase                             | D-arabinose-5-phosphate = D-ribulose-5-phosphate                          |
| R-0569 | 0       | R-0569 | 0       | R-0569 | salicylate hydroxylase                                        | salicylate + NADH + O2 + 2 H+ = catechol + CO2 + NAD+ + H2O               |
| R-0570 | 0       | R-0570 | 0       | R-0570 | adenine phosphoribosyltransferase                             | 5-phosphoribosyl-1-pyrophosphate + adenine = AMP + diphosphate            |
| R-0571 | 0       | R-0571 | 0       | R-0571 | inositol monophosphatase                                      | D-myo-inositol-3-monophosphate + H2O = phosphate + myo-inositol           |
| R-0572 | 0       | R-0572 | 0       | R-0572 | glycerol-2-phosphatase                                        | glycerol-2-phosphate + H2O = glycerol + phosphate                         |
| R-0573 | 0       | R-0573 | 0       | R-0573 | thiamine phosphate synthase                                   | 4-methyl-5-(b-hydroxyethyl)thiazole-phosphate + 4-amino-5-hydroxymet      |
| R-0574 | 0       | R-0574 | 0       | R-0574 | thiazole synthase 1                                           | iminoglycine + L-tyrosine + thiS-thif-acyl-disulfide = 4-methyl-5-(b-hydr |
| R-0576 | 0       | R-0576 | 0       | R-0576 | glycine oxidase 1                                             | glycine + H2O + O2 = glyoxylate + NH3 + H2O2                              |
| R-0577 | 0       | R-0577 | 0       | R-0577 | glycine oxidase 2                                             | D-alanine + H2O + O2 = pyruvate + NH3 + H2O2                              |
| R-0578 | 0       | R-0578 | 0       | R-0578 | glycine oxidase 3                                             | sarcosine + H2O + O2 = glyoxylate + methylamine + H2O2                    |
| R-0579 | 0       | R-0579 | 0       | R-0579 | glycine oxidase 4                                             | N-ethylglycine + H2O + O2 = glyoxylate + ethylamine + H2O2                |
| R-0580 | 0       | R-0580 | 0       | R-0580 | gluconolactonase                                              | glucono-d-lactone[p] + H2O[p] = D-gluconate[p]                            |
| R-0581 | 0       | R-0581 | 0       | R-0581 | coproporphyrinogen III oxidase                                | coproporphyrinogen-III + O2 = protoporphyrinogen-IX + 2 CO2 + 2 H2O       |
| R-0582 | 0       | R-0582 | 0       | R-0582 | AMP nucleosidase                                              | AMP[p] + H2O[p] = D-ribose-5-phosphate[p] + adenine[p]                    |
| R-0583 | 0       | R-0583 | 0       | R-0583 | ceramide glucosyltransferase                                  | UDP-glucose + ceramide = UDP + D-glucosyl-ceramide                        |
| R-0584 | 0       | R-0584 | 0       | R-0584 | 7,8-diaminopelargonic acid synthetase                         | (S)-adenosyl-L-methionine + 7-keto-8-aminopelargolate = (S)-adenosyl-     |
| R-0585 | 0       | R-0585 | 0       | R-0585 | 7-keto-8-aminopelargonic acid synthetase                      | 6-carboxyhexanoyl-CoA + L-alanine = CO2 + 7-keto-8-aminopelargolat        |
| R-0586 | 0       | R-0586 | 0       | R-0586 | biotin biosynthesis hypothetical reaction                     | methionyl-CoA + ADP + phosphate + ATP + 6-carboxyhexanoyl-CoA + HK        |
| R-0587 | 0       | R-0587 | 0       | R-0587 | cobalamin synthase                                            | adenosylcobinamide-GDP + a-ribazole = coenzyme-B12 + GMP                  |
| R-0588 | 0       | R-0588 | 0       | R-0588 | cobalamin-5'-phosphate synthase                               | adenosylcobinamide-GDP + a-ribazole-5'-P = adenosylcobalamin-5'-ph        |
| R-0589 | 0       | R-0589 | 0       | R-0589 | nicotinate-nucleotide-dimethylbenzimidazole phosphoribosyl    | nicotinate-nucleotide + dimethylbenzimidazole = nicotinate + a-rib        |
| R-0590 | 0       | R-0590 | 0       | R-0590 | 3-demethylubiquinol-8-3-O-methyltransferase                   | (S)-adenosyl-L-methionine + 3-demethylubiquinol-8 = (S)-adenosyl-l-ho     |
| R-0591 | 0       | R-0591 | 0       | R-0591 | 2-octaprenyl-6-hydroxyphenol methylase                        | 2-octaprenyl-6-hydroxyphenol + (S)-adenosyl-L-methionine = 2-octapren     |
| R-0593 | 0       | R-0593 | 0       | R-0593 | nitric oxide dioxygenase                                      | 2 NO + NADPH + 2 O2 = 2 NO3- + NADP+ + H+                                 |

|        |         |        |         |        |   |                                                                    |                                                                           |
|--------|---------|--------|---------|--------|---|--------------------------------------------------------------------|---------------------------------------------------------------------------|
| R-0594 | 0       | R-0594 | 0       | R-0594 | 0 | dihydropteridine reductase                                         | 5,6,7,8-tetrahydropteridine + NADP+ = 6,7-dihydropteridine + NADPH +      |
| R-0595 | 0       | R-0595 | 0       | R-0595 | 0 | phosphoribulokinase                                                | D-ribulose-5-phosphate + ATP = D-ribulose-1,5-bisphosphate + ADP          |
| R-0596 | 0.0084  | R-0596 | 0.005   | R-0596 | 0 | ornithine decarboxylase                                            | L-ornithine = CO2 + putrescine                                            |
| R-0597 | 0       | R-0597 | 0       | R-0597 | 0 | molybdopterin guanine dinucleotide synthase                        | molybdenum-cofactor + GTP + 4 H+ = molybdopterin-guanine-dinucleoti       |
| R-0598 | 0       | R-0598 | 0       | R-0598 | 0 | precorrin-6Y C(15)-methyltransferase                               | precorrin-6B + 2 (S)-adenosyl-L-methionine = precorrin-8x + 2 (S)-aden    |
| R-0599 | 0       | R-0599 | 0       | R-0599 | 0 | precorrin-4 C(11)-methyltransferase                                | (S)-adenosyl-L-methionine + precorrin-4 = (S)-adenosyl-L-homocysteine     |
| R-0600 | 0       | R-0600 | 0       | R-0600 | 0 | cobyrinic acid a,c-diamide synthase                                | cobyrinate + 2 L-glutamine + 2 ATP + 2 H2O = cob(II)yrinate-a,c-diamidi   |
| R-0601 | 0       | R-0601 | 0       | R-0601 | 0 | hydrogenobyrinate a,c-diamide synthase                             | hydrogenobyrinate + 2 L-glutamine + 2 ATP + 2 H2O = 2 L-glutamate +       |
| R-0602 | 0       | R-0602 | 0       | R-0602 | 0 | isonitrile hydratase                                               | N-cyclohexylformamide = cyclohexyl-isocyanide + H2O                       |
| R-0603 | -0.0449 | R-0603 | -0.0265 | R-0603 | 0 | urease                                                             | urea + H2O = 2 NH3 + CO2                                                  |
| R-0604 | 0       | R-0604 | 0       | R-0604 | 0 | 6-pyruvoyl tetrahydrobiopterin synthase                            | 7,8-dihydroneopterin-triphosphate = triphosphate + 6-pyruvoyl-tetrahyd    |
| R-0605 | 0       | R-0605 | 0       | R-0605 | 0 | quinoprotein ethanol dehydrogenase                                 | ethanol[p] + 2 oxidized-cytochrome-c = 2 reduced-cytochrome-c + 2 H+[     |
| R-0606 | 0       | R-0606 | 0       | R-0606 | 0 | cytochrome d terminal oxidase                                      | 2 UQH2 + O2 + 4 H+ = 2 UQ + 2 H2O + 4 H+[p]                               |
| R-0607 | 0       | R-0607 | 0       | R-0607 | 0 | 2-octaprenylphenol hydroxylase                                     | 2-octaprenylphenol + O2 + 2 H+ = 2-octaprenyl-6-hydroxyphenol + H2O       |
| R-0608 | 0       | R-0608 | 0       | R-0608 | 0 | NADPH-dependent FMN reductase                                      | FMNH2 + NADP+ = FMN + NADPH + H+                                          |
| R-0609 | 0       | R-0609 | 0       | R-0609 | 0 | precorrin-3B C(17)-methyltransferase                               | precorrin-3B + (S)-adenosyl-L-methionine = precorrin-4 + (S)-adenosyl-L   |
| R-0610 | 0       | R-0610 | 0       | R-0610 | 0 | precorrin-2 C(20)-methyltransferase                                | precorrin-2 + (S)-adenosyl-L-methionine = (S)-adenosyl-L-homocysteine     |
| R-0611 | 0       | R-0611 | 0       | R-0611 | 0 | precorrin-8X methylmutase                                          | precorrin-8x = hydrogenobyrinate                                          |
| R-0612 | 0       | R-0612 | 0       | R-0612 | 0 | precorrin-3B synthase                                              | precorrin-3A + NADH + O2 + H+ = precorrin-3B + NAD+ + H2O                 |
| R-0613 | 0       | R-0613 | 0       | R-0613 | 0 | cobinamide phosphate guanylyltransferase                           | adenosyl-cobinamide-phosphate + GTP = adenosylcobinamide-GDP + c          |
| R-0614 | 0       | R-0614 | 0       | R-0614 | 0 | cobinamide kinase                                                  | adenosylcobinamide + ATP = adenosyl-cobinamide-phosphate + ADP            |
| R-0615 | 0       | R-0615 | 0       | R-0615 | 0 | cobalamin adenosyltransferase                                      | ATP + cob(II)alamin = coenzyme-B12 + triphosphate + H+                    |
| R-0616 | 0       | R-0616 | 0       | R-0616 | 0 | ferrochelataase                                                    | Fe2+ + protoporphyrin-IX = protoheme-IX + 2 H+                            |
| R-0617 | 0.0028  | R-0617 | 0.0017  | R-0617 | 0 | dephospho-CoA kinase                                               | dephospho-CoA + ATP = ADP + CoA                                           |
| R-0618 | 0       | R-0618 | 0       | R-0618 | 0 | uroporphyrinogen decarboxylase                                     | uroporphyrinogen-III + 4 CO2 + coproporphyrinogen-III                     |
| R-0619 | 0       | R-0619 | 0       | R-0619 | 0 | molybdopterin synthase sulfurylase                                 | precursor-Z + 2 sulfated-molybdopterin-synthase = 2 molybdopterin-sy      |
| R-0620 | 0       | R-0620 | 0       | R-0620 | 0 | ETF dehydrogenase                                                  | reduced-ETF + UQ = oxidized-ETF + UQH2                                    |
| R-0621 | 0       | R-0621 | 0       | R-0621 | 0 | 3-hydroxybutyryl-CoA dehydrogenase                                 | (S)-3-hydroxybutanoyl-CoA + NADP+ = acetoacetyl-CoA + NADPH + H+          |
| R-0622 | 0       | R-0622 | 0       | R-0622 | 0 | uracil phosphoribosyltransferase                                   | diphosphate + UMP = 5-phosphoribosyl-1-pyrophosphate + uraci              |
| R-0623 | 0       | R-0623 | 0       | R-0623 | 0 | glycogen phosphorylase-limit dextrin a-1,6-glucosylase             | limit-dextrin + H2O = maltotriose + debranched-limit-dextrin              |
| R-0624 | 0       | R-0624 | 0       | R-0624 | 0 | thiamine biosynthesis protein thtC                                 | 5-aminimidazole-ribonucleotide + (S)-adenosyl-L-methionine = hydroxy      |
| R-0625 | 0       | R-0625 | -0.0133 | R-0625 | 0 | guanine deaminase                                                  | guanine + H2O = NH3 + xanthine                                            |
| R-0626 | 0       | R-0626 | 0       | R-0626 | 0 | ureidoglycolate amidohydrolase                                     | (S)-ureidoglycolate + H2O = 2 NH3 + CO2 + glyoxylate                      |
| R-0627 | 0.0028  | R-0627 | 0.0017  | R-0627 | 0 | 3-methyl-2-oxobutanate 5,10-methylenetetrahydrofolate              | 3-methyl-2-oxobutanate + 5,10-methylenetetrahydrofolate + H2O = 2-c       |
| R-0628 | 0       | R-0628 | 0       | R-0628 | 0 | carboxymethylenebutenolidase                                       | 2-chloro-cis-dienelactone + H2O = 2-chloromaleylacetate + H+              |
| R-0629 | 0       | R-0629 | 0       | R-0629 | 0 | dienelactone hydrolase (cis)                                       | cis-dienelactone + H2O = 2-maleylacetate + H+                             |
| R-0630 | 0       | R-0630 | 0       | R-0630 | 0 | dienelactone hydrolase (trans)                                     | trans-dienelactone + H2O = 2-maleylacetate + H+                           |
| R-0631 | 0       | R-0631 | 0       | R-0631 | 0 | 4-(b-D-ribofuranosyl)aminobenzene-5'-phosphate synthase            | p-aminobenzoate + 5-phosphoribosyl-1-pyrophosphate = 4-(b-D-ribofura      |
| R-0632 | 0       | R-0632 | 0       | R-0632 | 0 | acyl carrier protein phosphodiesterase                             | [acyl-carrier-protein] + H2O = 4'-phosphopantetheine + apo-[acyl-carrier- |
| R-0633 | 0       | R-0633 | 0       | R-0633 | 0 | homoserimide synthase 1                                            | putrescine + spermidine = 1,3-diaminopropane + sym-homoserimide           |
| R-0634 | 0       | R-0634 | 0       | R-0634 | 0 | homoserimide synthase 2                                            | 2 putrescine = NH3 + sym-homoserimide                                     |
| R-0635 | 0       | R-0635 | 0       | R-0635 | 0 | N-ethylmaleimide reductase                                         | N-ethylmaleimide + 2 H+ = N-ethylsuccinimide                              |
| R-0636 | 2.1378  | R-0636 | 2.1378  | R-0636 | 0 | inosinic pyrophosphatase                                           | diphosphate + H2O = 2 phosphate                                           |
| R-0637 | 0       | R-0637 | 0       | R-0637 | 0 | UDP-3-O-[3-hydroxymyristoyl]glucosamine N-acetyltransferase        | (3R)-3-hydroxytetradecanoyl-[acyl-carrier-protein] + UDP-3-O-(3-hydrox    |
| R-0638 | 0       | R-0638 | 0       | R-0638 | 0 | undecaprenyl diphosphate synthase 1                                | all-trans-farnesyl-diphosphate + isopentenyl-diphosphate = 2 cis,6-trans  |
| R-0639 | 0       | R-0639 | 0       | R-0639 | 0 | undecaprenyl diphosphate synthase 2                                | 2-cis 6-trans,10-trans-geranylgeranyl-diphosphate + isopentenyl-diphos    |
| R-0640 | 0       | R-0640 | 0       | R-0640 | 0 | undecaprenyl diphosphate synthase 3                                | di-trans,poly-cis-pentaprenyl-diphosphate + isopentenyl-diphosphate = d   |
| R-0641 | 0       | R-0641 | 0       | R-0641 | 0 | undecaprenyl diphosphate synthase 4                                | di-trans,poly-cis-hexaprenyl-diphosphate + isopentenyl-diphosphate = di   |
| R-0642 | 0       | R-0642 | 0       | R-0642 | 0 | undecaprenyl diphosphate synthase 5                                | di-trans,poly-cis-heptaprenyl-diphosphate + isopentenyl-diphosphate = d   |
| R-0643 | 0       | R-0643 | 0       | R-0643 | 0 | undecaprenyl diphosphate synthase 6                                | di-trans,poly-cis-octaprenyl-diphosphate + isopentenyl-diphosphate = di   |
| R-0644 | 0       | R-0644 | 0       | R-0644 | 0 | undecaprenyl diphosphate synthase 7                                | di-trans,poly-cis-nonaprenylidiphosphate + isopentenyl-diphosphate = di-  |
| R-0645 | 0       | R-0645 | 0       | R-0645 | 0 | undecaprenyl diphosphate synthase 8                                | di-trans,poly-cis-decaprenylidiphosphate + isopentenyl-diphosphate = di-  |
| R-0646 | 0       | R-0646 | 0       | R-0646 | 0 | acyl-CoA thioesterase II (n-h6.0)                                  | (3R)-3-hydroxyhexanoyl-CoA + H2O = (3R)-3-hydroxyhexanoate + CoA          |
| R-0647 | 0       | R-0647 | 0       | R-0647 | 0 | acyl-CoA thioesterase II (n-h8.0)                                  | (3R)-3-hydroxyoctanoyl-CoA + H2O = (3R)-3-hydroxyoctanoate + CoA          |
| R-0648 | 0       | R-0648 | 0       | R-0648 | 0 | acyl-CoA thioesterase II (n-10.0)                                  | (3R)-3-hydroxydodecanoyl-CoA + H2O = (3R)-3-hydroxydodecanoate + CoA      |
| R-0649 | 0       | R-0649 | 0       | R-0649 | 0 | acyl-CoA thioesterase II (n-12.0)                                  | (3R)-3-hydroxydodecanoyl-CoA + H2O = (3R)-3-hydroxydodecanoate + CoA      |
| R-0650 | 0       | R-0650 | 0       | R-0650 | 0 | acyl-CoA thioesterase II (n-14.0)                                  | (3R)-3-hydroxytetradecanoyl-CoA + H2O = (3R)-3-hydroxytetradecanoa        |
| R-0651 | 0       | R-0651 | 0       | R-0651 | 0 | acyl-CoA thioesterase II (n-16.0)                                  | (3R)-3-hydroxyhexadecanoyl-CoA + H2O = (3R)-3-hydroxyhexadecanoa          |
| R-0652 | 0       | R-0652 | 0       | R-0652 | 0 | acyl-CoA thioesterase II (n-18.0)                                  | (3R)-3-hydroxyoctadecanoyl-CoA + H2O = (3R)-3-hydroxyoctadecanoat         |
| R-0653 | 0       | R-0653 | 0       | R-0653 | 0 | acyl-CoA thioesterase II (n-6.0)                                   | hexanoyl-CoA + H2O = hexanoate + CoA                                      |
| R-0654 | 0       | R-0654 | 0       | R-0654 | 0 | acyl-CoA thioesterase II (n-8.0)                                   | octanoyl-CoA + H2O = octanoate + CoA                                      |
| R-0655 | 0       | R-0655 | 0       | R-0655 | 0 | acyl-CoA thioesterase II (n-10.0)                                  | decanoyl-CoA + H2O = decanoate + CoA                                      |
| R-0656 | 0       | R-0656 | 0       | R-0656 | 0 | acyl-CoA thioesterase II (n-12.0)                                  | dodecanoyl-CoA + H2O = dodecanoate + CoA                                  |
| R-0657 | 0       | R-0657 | 0       | R-0657 | 0 | acyl-CoA thioesterase II (n-14.0)                                  | tetradecanoyl-CoA + H2O = tetradecanoate + CoA                            |
| R-0658 | 0       | R-0658 | 0       | R-0658 | 0 | acyl-CoA thioesterase II (n-16.0)                                  | hexadecanoyl-CoA + H2O = hexadecanoate + CoA                              |
| R-0659 | 0       | R-0659 | 0       | R-0659 | 0 | acyl-CoA thioesterase II (n-18.0)                                  | octadecanoyl-CoA + H2O = octadecanoate + CoA                              |
| R-0660 | 0       | R-0660 | 0       | R-0660 | 0 | creatininase                                                       | creatine + H2O = creatine                                                 |
| R-0661 | 0       | R-0661 | 0       | R-0661 | 0 | fumarylacetoacetate hydrolase                                      | 4-fumaryl-acetoacetate + H2O = fumarate + acetoacetate                    |
| R-0662 | 0.0028  | R-0662 | 0.0017  | R-0662 | 0 | 2-dehydropanoate 2-reductase                                       | 2-dehydropantoate + NADPH + H+ = L-pantoate + NADP+                       |
| R-0663 | 0.0135  | R-0663 | 0.008   | R-0663 | 0 | sulfate adenylyltransferase                                        | SO42- + ATP + 2 H+ = adenosine-5'-phosphosulfate + diphosphate            |
| R-0664 | 0.0135  | R-0664 | 0.008   | R-0664 | 0 | phosphoadenosine 5'-phosphosulfate reductase                       | phosphoadenosine-5'-phosphosulfate + reduced-thioredoxin = adenosin       |
| R-0665 | 0.0135  | R-0665 | 0.008   | R-0665 | 0 | sulfite reductase-(NADPH)                                          | HSO3- + 3 NADPH + 4 H+ = H2S + 3 NADP+ + 3 H2O                            |
| R-0666 | 0       | R-0666 | 0       | R-0666 | 0 | pyridoxine 5'-phosphate synthase                                   | 1-deoxy-D-xylulose-5-phosphate + 1-amino-propan-2-one-3-phosphate +       |
| R-0667 | 0       | R-0667 | 0       | R-0667 | 0 | holo-[acyl-carrier-protein] synthase                               | apo-[acyl-carrier-protein] + CoA = adenosine-3',5'-bisphosphate + [acyl-  |
| R-0669 | 0       | R-0669 | 0       | R-0669 | 0 | glutathione reductase                                              | glutathione-disulfide + NADPH + H+ = 2 glutathione + NADP+                |
| R-0670 | 0.0007  | R-0670 | 0.0004  | R-0670 | 0 | NADPH-ferredoxin oxidoreductase 1                                  | 2 oxidized-ferredoxin + NADPH = 2 reduced-ferredoxin + NADP+ + H+         |
| R-0671 | 0       | R-0671 | 0       | R-0671 | 0 | dethiobiotin synthetase                                            | CO2 + 7,8-diaminopelargonate + ATP = dethiobiotin + phosphate + ADP       |
| R-0672 | 0       | R-0672 | 0       | R-0672 | 0 | undecaprenyl pyrophosphate phosphatase                             | di-trans,poly-cis-undecaprenyl-diphosphate + H2O = di-trans,poly-cis-un   |
| R-0673 | 0       | R-0673 | 0       | R-0673 | 0 | peptidoglycan glycosyltransferase                                  | diphosphoundecaprenyl-[GlcNAc-MurNAc-pentapeptide][n] + peptidogly        |
| R-0674 | 0.0028  | R-0674 | 0.0017  | R-0674 | 0 | pantothenate kinase                                                | (R)-pantothenate + ATP = (D)-4'-phosphopantetheinate + ADP                |
| R-0675 | 0       | R-0675 | 0       | R-0675 | 0 | methylamine dehydrogenase                                          | methylamine[p] + oxidized-aminoyanin + H2O[p] = formaldehyde[p] + NH3     |
| R-0676 | 0       | R-0676 | 0       | R-0676 | 0 | maleylacetoacetate isomerase                                       | 4-maleyl-acetoacetate = 4-fumaryl-acetoacetate                            |
| R-0677 | 0       | R-0677 | 0       | R-0677 | 0 | NADH:ubiquinone oxidoreductase II                                  | UQ + NADH + H+ = UQH2 + NAD+                                              |
| R-0679 | 0       | R-0679 | 0       | R-0679 | 0 | pyridoxal kinase                                                   | ATP + pyridoxal = ADP + pyridoxal-5'-phosphate                            |
| R-0680 | 0       | R-0680 | 0       | R-0680 | 0 | pyridoxamine kinase                                                | ATP + pyridoxamine = ADP + pyridoxamine-5'-phosphate                      |
| R-0681 | 0       | R-0681 | 0       | R-0681 | 0 | trans-2,3-dihydro-3-hydroxy-anthranilate isomerase                 | trans-2,3-dihydro-3-hydroxyanthranilate = 2,3-dihydro-3-hydroxy-anthr     |
| R-0682 | 0       | R-0682 | 0       | R-0682 | 0 | L-Ala-D/L-Glu epimerase                                            | L-Ala-y-D-Glu = L-Ala-L-Glu                                               |
| R-0683 | 0       | R-0683 | 0       | R-0683 | 0 | spermidine acetyltransferase                                       | acetyl-CoA + spermidine = N-acetylspermidine + CoA                        |
| R-0684 | 0       | R-0684 | 0       | R-0684 | 0 | methoxyneurosporene dehydrogenase 1                                | hydroxyneurosporene + oxidized-electron-acceptor = demethylspheroid       |
| R-0685 | 0.0001  | R-0685 | 0       | R-0685 | 0 | methoxyneurosporene dehydrogenase 2                                | rhodopin + oxidized-electron-acceptor = 3,4-dehydrothodopin + reduced     |
| R-0686 | 0.0001  | R-0686 | 0       | R-0686 | 0 | methoxyneurosporene dehydrogenase 3                                | rhodovibrin + oxidized-electron-acceptor = hydroxyspirilloxanthin + redu  |
| R-0687 | 0       | R-0687 | 0       | R-0687 | 0 | carbinic anhydrase                                                 | demethylspheroidene + (S)-adenosyl-L-methionine = spheroidene + (S)-      |
| R-0688 | 0       | R-0688 | 0       | R-0688 | 0 | hydroxyneurosporene methyltransferase 2                            | hydroxyneurosporene + (S)-adenosyl-L-methionine = methoxyneurosp          |
| R-0689 | 0       | R-0689 | 0       | R-0689 | 0 | hydroxyneurosporene methyltransferase 3                            | rhodopin + (S)-adenosyl-L-methionine = 3,4-dihydroanhydrothodovibrin      |
| R-0690 | 0       | R-0690 | 0       | R-0690 | 0 | hydroxyneurosporene methyltransferase 4                            | 3',4'-dihydrothodovibrin + (S)-adenosyl-L-methionine = 3,4,3',4'-tetrahyd |
| R-0691 | 0.0001  | R-0691 | 0       | R-0691 | 0 | hydroxyneurosporene methyltransferase 5                            | 3,4-dehydrothodopin + (S)-adenosyl-L-methionine = anhydrothodovibrin      |
| R-0692 | 0.0001  | R-0692 | 0       | R-0692 | 0 | hydroxyneurosporene methyltransferase 6                            | hydroxyspirilloxanthin + (S)-adenosyl-L-methionine = spirilloxanthin + (S |
| R-0693 | 0       | R-0693 | 0       | R-0693 | 0 | 2-desacetyl-2-hydroxyethyl bacteriochlorophyllide a dehydrog       | 2-desacetyl-2-hydroxyethyl-bacteriochlorophyllide a = bacteriochlorophyl  |
| R-0694 | 0       | R-0694 | 0       | R-0694 | 0 | chlorophyllide a reductase                                         | chlorophyllide a + ATP + H2O = 3-vinyl-bacteriochlorophyllide a + ADP +   |
| R-0695 | 0       | R-0695 | 0       | R-0695 | 0 | 3-hydroxyethylchlorophyllide a reductase                           | 3-hydroxyethylchlorophyllide a + 2 H+ = 2-desacetyl-2-hydroxyethyl-bact   |
| R-0696 | 0       | R-0696 | 0       | R-0696 | 0 | cyanase                                                            | cyanate + HCO3- + H+ = carbamate + CO2                                    |
| R-0697 | 0       | R-0697 | 0       | R-0697 | 0 | di-haem cytochrome c peroxidase                                    | H2O2[p] + 2 reduced-cytochrome-c + 2 H+ = 2 oxidized-cytochrome-c +       |
| R-0698 | 0       | R-0698 | 0       | R-0698 | 0 | L-sorbose dehydrogenase                                            | L-sorbose-2,6-lactone + reduced-electron-acceptor + H2O = 2-keto-L-       |
| R-0699 | 0       | R-0699 | 0       | R-0699 | 0 | xanthine dehydrogenase 1                                           | xanthine + NAD+ + H2O = urate + NADH + H+                                 |
| R-0700 | 0.137   | R-0700 | 0.1164  | R-0700 | 0 | CO2 + H2O = HCO3- + H+                                             | CO2 + H2O = HCO3- + H+                                                    |
| R-0701 | 0       | R-0701 | 0       | R-0701 | 0 | molybdenum-molybdopterin ligase                                    | molybdopterin-AMP + molybdate + H+ = molybdenum-cofactor + AMP +          |
| R-0702 | 0.0013  | R-0702 | 0.0008  | R-0702 | 0 | nicotinate nucleotide adenylyltransferase                          | ATP + nicotinate-mononucleotide = diphosphate + nicotinate-adenine-di     |
| R-0703 | 0       | R-0703 | 0       | R-0703 | 0 | acetyl-CoA:acetoacetyl-CoA transferase                             | acetoacetate + acetyl-CoA = acetoacetyl-CoA + acetate                     |
| R-0704 | 0       | R-0704 | 0       | R-0704 | 0 | UDP-N-acetylglucosamine-N-acetylmuramyl-(pentapeptide)             | pN-acetylmuramyl-pentapeptide-diphosphoundecaprenol + UDP-N-acet          |
| R-0705 | 0       | R-0705 | 0       | R-0705 | 0 | N-acetylmuramyl-L-alanyl-D-glutamyl-meso-2,6-diaminopimelyl-D-alan | pN-acetylmuramyl-L-alanyl-D-glutamyl-meso-2,6-diaminopimelyl-D-alan       |
| R-0706 | 0       | R-0706 | 0       | R-0706 | 0 | UDP-N-acetylmuramate-alanine ligase                                | L-alanine + UDP-N-acetylmuramate + ATP = UDP-N-acetylmuramoyl-L-          |
| R-0707 | 0       | R-0707 | 0       | R-0707 | 0 | D-alanine-D-alanine ligase B                                       | 2 D-alanine + ATP = D-alanyl-D-alanine + phosphate + ADP                  |
| R-0708 | 0       | R-0708 | 0       | R-0708 | 0 | UDP-3-O-acyl-N-acetylglucosamine deacetylase                       | UDP-3-O-(3-hydroxymyristoyl)-N-acetylglucosamine + H2O = UDP-3-O-         |
| R-0709 | 0       | R-0709 | 0       | R-0709 | 0 | thymidine phosphorylase                                            | phosphate + thymidine = deoxyribose-1-phosphate + thymine                 |
| R-0710 | 0       | R-0710 | 0       | R-0710 | 0 | uracil phosphorylase                                               | phosphate + deoxyuridine = deoxyribose-1-phosphate + uracil               |
| R-0711 | 0       | R-0711 | 0.0133  | R-0711 | 0 | xanthosine phosphorylase                                           | xanthosine + phosphate = alpha-D-ribose-1-phosphate + xanthine            |
| R-0712 | 0       | R-0712 | 0       | R-0712 | 0 | cytidine deaminase 1                                               | cytidine + H2O = uridine + NH3                                            |
| R-0713 | 0       | R-0713 | 0       | R-0713 | 0 | cytidine deaminase 2                                               | deoxycytidine + H2O = deoxyuridine + NH3                                  |
| R-0714 | 0       | R-0714 | 0       | R-0714 | 0 | tetracyclic diacylcharide 4'-kinase                                | lipid-A-disaccharide + ATP = lipid-IVA + ADP                              |
| R-0715 | 0       | R-0715 | 0       | R-0715 | 0 | 3-deoxy-D-manno-oculosonic acid transferase 1                      | (KDO)-lipid-IVA + CMP-3-deoxy-D-manno-oculosonate = KDO2-lipid-IV         |
| R-0716 | 0       | R-0716 | 0       | R-0716 | 0 | 3-deoxy-D-manno-oculosonic acid transferase 2                      | lipid-IVA + CMP-3-deoxy-D-manno-oculosonate = (KDO)-lipid-IVA + Cb        |
| R-0717 | 0       | R-0717 | 0       | R-0717 | 0 | GTP cyclohydrolase II                                              | GTP + 3 H2O = diphosphate + 2,5-diamino-6-(ribosylamino)-4-(3H)-pyri      |
| R-0718 | 0       | R-0718 | 0       | R-0718 | 0 | acylphosphatase (n-16.0)                                           | hexadecanoyl-phosphate + H2O = hexadecanoate + phosphate                  |
| R-0719 | 0       | R-0719 | 0       | R-0719 | 0 | acylphosphatase (n-16:1)                                           | hexadec-9-enoyl-phosphate + H2O = 9-hexadecenoate + phosphate             |

|        |         |        |         |        |                                                                   |                                                                            |
|--------|---------|--------|---------|--------|-------------------------------------------------------------------|----------------------------------------------------------------------------|
| R-0720 | 0       | R-0720 | 0       | R-0720 | acylphosphatase (n-18.0)                                          | octadecanoyl-phosphate + H2O = octadecanoate + phosphate                   |
| R-0721 | 0       | R-0721 | 0       | R-0721 | acylphosphatase (n-18.1)                                          | octadec-9-enoyl-phosphate + H2O = 9-octadecenoate + phosphate              |
| R-0722 | 0       | R-0722 | 0       | R-0722 | magnesium chelatase                                               | ATP + protoporphyrin-IX + Mg2+ + H2O = Mg-protoporphyrin + phospho         |
| R-0724 | 3.6169  | R-0724 | 0       | R-0724 | H(+)-translocating pyrophosphatases                               | diphosphate + H2O + H+ = 2 phosphate + H+[p]                               |
| R-0725 | 0       | R-0725 | 0       | R-0725 | octaprenyl diphosphate synthase 1                                 | isopentenyl-diphosphate + all-trans-geranyl-geranyl-diphosphate = gerani   |
| R-0726 | 0       | R-0726 | 0       | R-0726 | octaprenyl diphosphate synthase 2                                 | geranyl-farnesyl-diphosphate + isopentenyl-diphosphate = all-trans-hexa    |
| R-0727 | 0       | R-0727 | 0       | R-0727 | octaprenyl diphosphate synthase 3                                 | all-trans-hexaprenyl-diphosphate + isopentenyl-diphosphate = all-trans-l   |
| R-0728 | 0       | R-0728 | 0       | R-0728 | octaprenyl diphosphate synthase 4                                 | all-trans-heptaprenyl-diphosphate + isopentenyl-diphosphate = diphosph     |
| R-0729 | 0       | R-0729 | 0       | R-0729 | thiamine monophosphate kinase                                     | thiamine-phosphate + ATP = thiamine-diphosphate + ADP                      |
| R-0730 | 0       | R-0730 | 0       | R-0730 | 6,7-dimethyl-8-ribitylmazine synthase                             | 5-amino-6-ribitylamino-2,4(1H,3H)-pyrimidinedione + L-3,4-dihydroxybut     |
| R-0731 | 0       | R-0731 | 0       | R-0731 | riboflavin synthase                                               | 2 6,7-dimethyl-8-(1-D-ribityl)luzamine + 5-amino-6-ribitylamino-2,4(1H,3H) |
| R-0732 | 0       | R-0732 | 0       | R-0732 | diaminohydroxyphosphoribosylaminopyrimidine deaminase             | 2 5-diamino-6-(ribosylamino)-4(3H)-pyrimidione-5-phosphate + H2O =         |
| R-0733 | 0       | R-0733 | 0       | R-0733 | 5-amino-6-(5-phosphoribosylamino)uracil reductase                 | 5-amino-6-(5-phosphoribosylamino)uracil + NADPH + H+ = 5-amino-6-r         |
| R-0736 | 0.017   | R-0736 | 0.01    | R-0736 | hydroperoxidase                                                   | 2 H2O2 = 2 H2O + O2                                                        |
| R-0737 | 0       | R-0737 | 0       | R-0737 | heme d synthase                                                   | protoheme-IX + H2O2 = heme-d                                               |
| R-0738 | 0       | R-0738 | 0       | R-0738 | nitrate reductase (periplasmic)                                   | NO3-[p] + 2 reduced-cytochrome-c + 2 H+[p] = NO2-[p] + 2 oxidized-cyt      |
| R-0739 | 0       | R-0739 | 0       | R-0739 | uroporphyrin III C-methyltransferase 2                            | (S)-adenosyl-L-methionine + precorrin-1 = (S)-adenosyl-L-homocysteine      |
| R-0740 | 0       | R-0740 | 0       | R-0740 | uroporphyrin III C-methyltransferase 1                            | (S)-adenosyl-L-methionine + uroporphyrinogen-III = (S)-adenosyl-L-hom      |
| R-0741 | 0       | R-0741 | 0       | R-0741 | precorrin-2 dehydrogenase                                         | precorrin-2 + NAD+ = sirohdrochlorin + NADH + H+                           |
| R-0742 | 0       | R-0742 | 0       | R-0742 | sirohdrochlorin ferrochelatase                                    | sirohdrochlorin + Fe2+ = siroheme + 2 H+                                   |
| R-0743 | 0       | R-0743 | 0       | R-0743 | cobaltochelatase                                                  | hydrogenobyrinate-a-diamide + Co2+ + ATP + H2O = cob(II)yrinate-a-         |
| R-0744 | -0.0024 | R-0744 | -0.0014 | R-0744 | acyl-CoA dehydrogenase (n-4.0)                                    | butyryl-CoA + FAD = crotonyl-CoA + FADH2                                   |
| R-0745 | -0.0024 | R-0745 | -0.0014 | R-0745 | acyl-CoA dehydrogenase (n-6.0)                                    | hexanoyl-CoA + FAD = trans-hex-2-enoyl-CoA + FADH2                         |
| R-0746 | -0.0024 | R-0746 | -0.0014 | R-0746 | acyl-CoA dehydrogenase (n-8.0)                                    | octanoyl-CoA + FAD = trans-oct-2-enoyl-CoA + FADH2                         |
| R-0747 | -0.0024 | R-0747 | -0.0014 | R-0747 | acyl-CoA dehydrogenase (n-10.0)                                   | decanoyl-CoA + FAD = trans-dec-2-enoyl-CoA + FADH2                         |
| R-0748 | -0.0024 | R-0748 | -0.0014 | R-0748 | acyl-CoA dehydrogenase (n-12.0)                                   | dodecanoyl-CoA + FAD = trans-dodec-2-enoyl-CoA + FADH2                     |
| R-0749 | -0.0024 | R-0749 | -0.0014 | R-0749 | acyl-CoA dehydrogenase (n-14.0)                                   | tetradecanoyl-CoA + FAD = trans-tetradec-2-enoyl-CoA + FADH2               |
| R-0750 | -0.0024 | R-0750 | -0.0014 | R-0750 | acyl-CoA dehydrogenase (n-16.0)                                   | hexadecanoyl-CoA + FAD = trans-hexadec-2-enoyl-CoA + FADH2                 |
| R-0751 | -0.0012 | R-0751 | -0.0007 | R-0751 | acyl-CoA dehydrogenase (n-18.0)                                   | octadecanoyl-CoA + FAD = trans-octadec-2-enoyl-CoA + FADH2                 |
| R-0752 | 0       | R-0752 | 0       | R-0752 | acyl-CoA dehydrogenase (n-12.1)                                   | cis-dodec-5-enoyl-CoA + FAD = trans-3-cis-5-dodecenoacyl-CoA + FADH2       |
| R-0753 | 0       | R-0753 | 0       | R-0753 | acyl-CoA dehydrogenase (n-14.1)                                   | cis-tetradec-7-enoyl-CoA + FAD = trans-3-cis-7-tetradecenoacyl-CoA + FA    |
| R-0754 | 0       | R-0754 | 0       | R-0754 | acyl-CoA dehydrogenase (n-16.1)                                   | hexadec-9-enoyl-CoA + FAD = trans-3-cis-9-hexadecenoacyl-CoA + FADH        |
| R-0755 | 0       | R-0755 | 0       | R-0755 | acyl-CoA dehydrogenase (n-18.1)                                   | octadec-9-enoyl-CoA + FAD = trans-3-cis-11-octadecenoacyl-CoA + FADH       |
| R-0756 | 0       | R-0756 | 0       | R-0756 | heme O synthase                                                   | protoheme-IX + all-trans-farnesyl-diphosphate + H2O = heme-o + diphos      |
| R-0757 | 0       | R-0757 | 0       | R-0757 | N-formylglutamate amidohydrolase                                  | N-formyl-L-glutamate + H2O = L-glutamate + formate                         |
| R-0758 | 0       | R-0758 | 0       | R-0758 | haloacid dehalogenase                                             | chloroacetate + H2O = glycolate + HCl                                      |
| R-0759 | 0       | R-0759 | 0       | R-0759 | superoxide dismutase                                              | 2 superoxide + 2 H+ = H2O2 + O2                                            |
| R-0760 | 0       | R-0760 | 0       | R-0760 | sulfite oxidase                                                   | HSO3- + O2 + H2O = H2O2 + SO42- + H+                                       |
| R-0762 | 0       | R-0762 | 0       | R-0762 | 2-hydroxychromene-2-carboxylate isomerase                         | 2-hydroxychromene-2-carboxylate = trans-O-hydroxybenzylidenepyrivate       |
| R-0763 | 0       | R-0763 | 0       | R-0763 | precorrin-5 (C1)-methyltransferase                                | precorrin-5 + (S)-adenosyl-L-methionine + H2O = precorrin-6A + (S)-ade     |
| R-0764 | 0       | R-0764 | 0       | R-0764 | fatty acyl-CoA synthetase (n-4.0)                                 | butyrate + ATP + CoA = butyryl-CoA + AMP + diphosphate                     |
| R-0765 | 0       | R-0765 | 0       | R-0765 | fatty acyl-CoA synthetase (n-6.0)                                 | hexanoate + ATP + CoA = hexanoyl-CoA + AMP + diphosphate                   |
| R-0766 | 0       | R-0766 | 0       | R-0766 | fatty acyl-CoA synthetase (n-8.0)                                 | octanoate + ATP + CoA = octanoyl-CoA + AMP + diphosphate                   |
| R-0767 | 0       | R-0767 | 0       | R-0767 | fatty acyl-CoA synthetase (n-10.0)                                | decanoate + ATP + CoA = decanoyl-CoA + AMP + diphosphate                   |
| R-0768 | 0       | R-0768 | 0       | R-0768 | fatty acyl-CoA synthetase (n-12.0)                                | dodecanoate + ATP + CoA = dodecanoyl-CoA + AMP + diphosphate               |
| R-0769 | 0       | R-0769 | 0       | R-0769 | fatty acyl-CoA synthetase (n-14.0)                                | tetradecanoate + ATP + CoA = tetradecanoyl-CoA + AMP + diphosphate         |
| R-0770 | -0.0012 | R-0770 | -0.0007 | R-0770 | fatty acyl-CoA synthetase (n-16.0)                                | hexadecanoate + ATP + CoA = hexadecanoyl-CoA + AMP + diphosphate           |
| R-0771 | -0.0012 | R-0771 | -0.0007 | R-0771 | fatty acyl-CoA synthetase (n-18.0)                                | octadecanoate + ATP + CoA = octadecanoyl-CoA + AMP + diphosphate           |
| R-0772 | 0       | R-0772 | 0       | R-0772 | fatty acyl-CoA synthetase (n-12.1)                                | 5-dodecanoate + ATP + CoA = cis-dodec-5-enoyl-CoA + AMP + diphosph         |
| R-0773 | 0       | R-0773 | 0       | R-0773 | fatty acyl-CoA synthetase (n-14.1)                                | 7-tetradecanoate + ATP + CoA = cis-tetradec-7-enoyl-CoA + AMP + dipl       |
| R-0774 | 0       | R-0774 | 0       | R-0774 | fatty acyl-CoA synthetase (n-16.1)                                | 9-hexadecanoate + ATP + CoA = hexadec-9-enoyl-CoA + AMP + diphos           |
| R-0775 | 0       | R-0775 | 0       | R-0775 | fatty acyl-CoA synthetase (n-18.1)                                | 9-octadecanoate + ATP + CoA = octadec-9-enoyl-CoA + AMP + diphosph         |
| R-0776 | 0       | R-0776 | 0       | R-0776 | adenine deaminase                                                 | adenine + H2O = NH3 + hypoxanthine                                         |
| R-0777 | 0       | R-0777 | 0       | R-0777 | exopolysphatase                                                   | polyphosphate(n) + H2O = polyphosphate(n-1) + phosphate                    |
| R-0778 | 0       | R-0778 | 0       | R-0778 | lauroyl acyltransferase                                           | dodecanoyl-[acyl-carrier-protein] + KD02-lipid-IVA = KD02-(lauroyl)-lipi   |
| R-0779 | 0       | R-0779 | 0       | R-0779 | alcohol dehydrogenase (isopropanol)                               | isopropanol + NAD+ = acetone + NADH + H+                                   |
| R-0780 | 0       | R-0780 | 0       | R-0780 | alcohol dehydrogenase (acetaldehyde)                              | acetaldehyde + NADH + H+ = ethanol + NAD+                                  |
| R-0781 | 0       | R-0781 | 0       | R-0781 | acetyl reductase                                                  | acetyl + NADH + H+ = 2,3-butanediol + NAD+                                 |
| R-0782 | 0       | R-0782 | 0       | R-0782 | diacyl reductase                                                  | diacyl + NADH + H+ = acetyl + NAD+                                         |
| R-0783 | 0       | R-0783 | 0       | R-0783 | 3,4-dihydroxy-2-butanone-4-phosphate synthase                     | D-ribulose-5-phosphate + formate + L-3,4-dihydroxybutan-2-one-4-phos       |
| R-0784 | 0       | R-0784 | 0       | R-0784 | pyrimidine phosphatase                                            | 5-amino-6-ribitylamino-2,4(1H,3H)-pyrimidinedione-5-phosphate + H2O        |
| R-0785 | 0       | R-0785 | 0       | R-0785 | 2,3-dihydro-3-hydroxy-anthranilate oxidation (spontaneous)        | 2,3-dihydro-3-hydroxy-anthranilate = 2,3-dihydro-3-oxo-anthranilate + 4    |
| R-0786 | 0       | R-0786 | 0       | R-0786 | 2,3-dihydro-3-oxo-anthranilate condensation (hypothetical)        | 2,3-dihydro-3-oxo-anthranilate = phenazine-1-carboxylate + CO2 + 2         |
| R-0787 | 0.0013  | R-0787 | 0.0008  | R-0787 | NH3-dependent NAD(+) synthetase                                   | ATP + nicotinate-adenine-dinucleotide + NH3 = AMP + diphosphate + N        |
| R-0788 | 0       | R-0788 | 0       | R-0788 | anhydro-N-acetylmuramoyl-L-alanine amidase                        | N-GlcNAc-1,6-anhMurNAc-L-Ala-gamma-D-Glu-DAP-D-Ala + H2O = GlcN            |
| R-0789 | 0       | R-0789 | 0       | R-0789 | 4-hydroxybenzoate octaprenyltransferase                           | all-trans-octaprenyl-diphosphate + 4-hydroxybenzoate = 3-octaprenyl-4-     |
| R-0790 | 0       | R-0790 | 0       | R-0790 | chormate lyase                                                    | chormate = 4-hydroxybenzoate + pyruvate                                    |
| R-0791 | 0       | R-0791 | 0       | R-0791 | 3-octaprenyl-4-hydroxybenzoate carboxylase                        | 3-octaprenyl-4-hydroxybenzoate = 2-octaprenylphenol + CO2                  |
| R-0792 | 0       | R-0792 | 0       | R-0792 | molycopdin biosynthesis protein                                   | GTP + H2O = precursor-2 + diphosphate                                      |
| R-0793 | 0       | R-0793 | 0       | R-0793 | 4-hydroxy-L-threonine phosphate dehydrogenase, NAD-deper          | 4-(phosphonoxy)-threonine + NAD+ = (2S)-2-amino-3-oxo-4-phosphon           |
| R-0794 | 0       | R-0794 | 0       | R-0794 | xanthine dehydrogenase 2                                          | hypoxanthine + H2O = xanthine + 2 H+                                       |
| R-0795 | 0       | R-0795 | 0       | R-0795 | urea carboxylase                                                  | ATP + urea + CO2 + H2O = ADP + phosphate + urea-1-carboxylate              |
| R-0796 | 0       | R-0796 | 0       | R-0796 | allophanate hydrolase                                             | urea-1-carboxylate + H2O = 2 NH3 + 2 CO2                                   |
| R-0797 | 0       | R-0797 | 0       | R-0797 | putative n-methylproline demethylase                              | monomethyl-proline + demethylated-methyl-acceptor = L-proline + meth       |
| R-0798 | 0       | R-0798 | 0       | R-0798 | choline kinase                                                    | choline + ATP = phosphoryl-choline + ADP + 2 H+                            |
| R-0799 | 0       | R-0799 | 0       | R-0799 | ethanolamine kinase                                               | ethanolamine + ATP = phosphoryl-ethanolamine + ADP                         |
| R-0800 | 0       | R-0800 | 0       | R-0800 | hydantoinase                                                      | dihydrouracil + H2O = 3-ureidopropionate                                   |
| R-0801 | 0       | R-0801 | 0       | R-0801 | UDP-N-acetylglucosamine-2-epimerase                               | UDP-N-acetyl-D-glucosamine + H2O = N-acetyl-D-mannosamine + UDP            |
| R-0802 | 0       | R-0802 | 0       | R-0802 | nigerose hydrolase                                                | nigerose + H2O = 2 D-glucose                                               |
| R-0803 | 0       | R-0803 | 0       | R-0803 | 2-octaprenyl-6-methoxyphenol hydroxylase                          | 2-octaprenyl-6-methoxyphenol + O2 + 4 H+ = 2-octaprenyl-6-methoxy-1        |
| R-0804 | 0       | R-0804 | 0       | R-0804 | nicotinamide                                                      | nicotinamide + H2O = NH3 + nicotinate                                      |
| R-0805 | 0       | R-0805 | 0       | R-0805 | agmatinase                                                        | agmatine + H2O = urea + putrescine                                         |
| R-0806 | 0.0028  | R-0806 | 0.0017  | R-0806 | phosphopantothenoicysteine decarboxylase                          | (R)-4'-phosphopantothenoic-L-cysteine = 4'-phosphopantetheine + CO2        |
| R-0807 | 0.0028  | R-0807 | 0.0017  | R-0807 | phosphopantothenoicysteine synthetase                             | (D)-4'-phosphopantetheine + L-cysteine + CTP = (R)-4'-phosphopantot        |
| R-0808 | 0       | R-0808 | 0       | R-0808 | (S)-adenosylmethionine-2-DMK methyltransferase                    | (S)-adenosyl-L-methionine + demethylmenaquinone-8 = (S)-adenosyl-L-        |
| R-0809 | 0       | R-0809 | 0       | R-0809 | 2-octaprenyl-6-methoxy-1,4-benzoquinone methylase                 | (S)-adenosyl-L-methionine + 2-octaprenyl-6-methoxy-1,4-benzoquinol =       |
| R-0810 | 0       | R-0810 | 0       | R-0810 | biotin synthase                                                   | sulfurated-sulfur-donor + dethiobiotin + 2 (S)-adenosyl-L-methionine = b   |
| R-0811 | 0       | R-0811 | 0       | R-0811 | 5-carboxymethyl-2-oxo-hex-3-ene-1,7-dioate decarboxylase          | 5-carboxy-2-oxohept-3-enedioate = 2-hydroxyhepta-2,4-dienedioate + C       |
| R-0812 | 0       | R-0812 | 0       | R-0812 | 5-carboxymethyl-2-hydroxymuconate isomerase                       | 5-carboxymethyl-2-hydroxymuconate = 5-carboxy-2-oxohept-3-enedioate        |
| R-0813 | 0       | R-0813 | 0       | R-0813 | rubredoxin NAD+ reductase                                         | oxidized-rubredoxin + NADH = reduced-rubredoxin + NAD+                     |
| R-0814 | 0.0001  | R-0814 | 0.0001  | R-0814 | pyridine nucleotide-disulfide oxidoreductase                      | oxidized-electron-acceptor + NADH + H+ = reduced-electron-acceptor +       |
| R-0815 | 0       | R-0815 | 0       | R-0815 | catalase                                                          | ethanol + H2O2 = acetaldehyde + 2 H2O                                      |
| R-0816 | 0       | R-0816 | 0       | R-0816 | maltose acetyltransferase                                         | maltose + acetyl-CoA = acetylmaltose + CoA                                 |
| R-0817 | 0       | R-0817 | 0       | R-0817 | D-lactate dehydrogenase                                           | D-lactate + NAD+ = pyruvate + NADH + H+                                    |
| R-0819 | -0.0024 | R-0819 | -0.0014 | R-0819 | enoyl-CoA hydratase (n-6.0)                                       | trans-hex-2-enoyl-CoA + H2O = (3S)-3-hydroxyhexanoyl-CoA                   |
| R-0820 | -0.0024 | R-0820 | -0.0014 | R-0820 | enoyl-CoA hydratase (n-8.0)                                       | trans-oct-2-enoyl-CoA + H2O = (3S)-3-hydroxyoctanoyl-CoA                   |
| R-0821 | -0.0024 | R-0821 | -0.0014 | R-0821 | enoyl-CoA hydratase (n-12.0)                                      | trans-dodec-2-enoyl-CoA + H2O = (3S)-3-hydroxydodecanoyl-CoA               |
| R-0822 | -0.0024 | R-0822 | -0.0014 | R-0822 | enoyl-CoA hydratase (n-14.0)                                      | trans-tetradec-2-enoyl-CoA + H2O = (3S)-3-hydroxytetradecanoyl-CoA         |
| R-0823 | -0.0024 | R-0823 | -0.0014 | R-0823 | enoyl-CoA hydratase (n-16.0)                                      | trans-hexadec-2-enoyl-CoA + H2O = (3S)-3-hydroxyhexadecanoyl-CoA           |
| R-0824 | -0.0012 | R-0824 | -0.0007 | R-0824 | enoyl-CoA hydratase (n-18.0)                                      | trans-octadec-2-enoyl-CoA + H2O = (3S)-3-hydroxyoctadecanoyl-CoA           |
| R-0825 | 0       | R-0825 | 0       | R-0825 | enoyl-CoA hydratase (n-12.1)                                      | trans-3-cis-5-dodecenoacyl-CoA + H2O = (3S)-3-hydroxy-cis-dodec-5-enoyl    |
| R-0826 | 0       | R-0826 | 0       | R-0826 | enoyl-CoA hydratase (n-14.1)                                      | trans-3-cis-7-tetradecenoacyl-CoA + H2O = (3S)-3-hydroxy-cis-tetradec-7-   |
| R-0827 | 0       | R-0827 | 0       | R-0827 | enoyl-CoA hydratase (n-16.1)                                      | trans-3-cis-9-hexadecenoacyl-CoA + H2O = (3S)-3-hydroxy-cis-hexadec-9-     |
| R-0828 | 0       | R-0828 | 0       | R-0828 | enoyl-CoA hydratase (n-18.1)                                      | trans-3-cis-11-octadecenoacyl-CoA + H2O = (3S)-3-hydroxy-cis-octadec-11-   |
| R-0829 | 0       | R-0829 | 0       | R-0829 | cardiolipin synthase (n-6.0)                                      | phosphatidylglycerol(dihexadecanoyl) = cardiolipin(dihexadecanoyl) + gl    |
| R-0830 | 0       | R-0830 | 0       | R-0830 | cardiolipin synthase (n-6.1)                                      | phosphatidylglycerol(dihexadec-9-enoyl) = cardiolipin(dihexadec-9-enoyl    |
| R-0831 | 0       | R-0831 | 0       | R-0831 | cardiolipin synthase (n-8.0)                                      | phosphatidylglycerol(dioctadecanoyl) = cardiolipin(dioctadecanoyl) + gly   |
| R-0832 | 0       | R-0832 | 0       | R-0832 | cardiolipin synthase (n-18.1)                                     | phosphatidylglycerol(dioctadec-9-enoyl) = cardiolipin(dioctadec-9-enoyl)   |
| R-0833 | 0       | R-0833 | 0       | R-0833 | hydroxymethylpyrimidine kinase                                    | ATP + hydroxymethylpyrimidine = ADP + hydroxymethylpyrimidine-phos         |
| R-0834 | 0       | R-0834 | 0       | R-0834 | phosphohydroxymethylpyrimidine kinase                             | hydroxymethylpyrimidine-phosphate + ATP = 4-amino-5-hydroxymethyl-         |
| R-0835 | 0       | R-0835 | 0       | R-0835 | ferredoxin-nitrite reductase                                      | NO2- + 6 reduced-ferredoxin + 7 H+ = NH3 + 6 oxidized-ferredoxin + 2 H     |
| R-0837 | 0       | R-0837 | 0       | R-0837 | saccharopine + NADP+ + H2O = L-glutamate + 2-aminoadipate-6-semia |                                                                            |
| R-0838 | 0       | R-0838 | 0       | R-0838 | nicotinate phosphoribosyltransferase                              | nicotinate-mononucleotide + diphosphate = nicotinate + 5-phosphoribos      |
| R-0839 | 0.0028  | R-0839 | 0.0017  | R-0839 | panthetheine-phosphate adenyltransferase                          | 4'-phosphopantetheine + ATP = dephospho-CoA + diphosphate                  |
| R-0840 | 0       | R-0840 | 0       | R-0840 | UDP-N-acetylmuramoylalanine-D-glutamate ligase                    | UDP-N-acetylmuramoyl-L-alanine + D-glutamate + ATP = UDP-N-acetyl          |
| R-0841 | 0       | R-0841 | 0       | R-0841 | UDP-N-acetylmuramoyl-L-alanyl-D-glutamyl-2,6-diaminopimelate      | UDP-N-acetylmuramoyl-L-alanyl-D-glutamyl-meso-2,6-diaminopimelate          |
| R-0842 | 0       | R-0842 | 0       | R-0842 | phospho-N-acetylmuramoyl-pentapeptide-transferase 1               | UDP-N-acetylmuramoyl-L-alanyl-D-glutamyl-meso-2,6-diaminopimelyl-D         |
| R-0843 | 0       | R-0843 | 0       | R-0843 | phospho-N-acetylmuramoyl-pentapeptide-transferase 2               | UDP-N-acetylmuramoyl-L-alanyl-D-glutamyl-L-tyrosyl-D-alanyl-D-alanine +    |
| R-0844 | 0       | R-0844 | 0       | R-0844 | UDP-N-acetylmuramoyl-L-alanyl-D-glutamate 2,6-diaminopimela       | UDP-N-acetylmuramoyl-L-alanyl-D-glutamate + meso-diaminohexptanedi         |
| R-0845 | 0       | R-0845 | 0       | R-0845 | UDP-N-acetylglucosamine acyltransferase                           | (3R)-3-hydroxytetradecanoyl-[acyl-carrier-protein] + UDP-N-acetyl-D-glu    |
| R-0846 | 0       | R-0846 | 0       | R-0846 | lipid-A-disaccharide synthase                                     | 2,3-bis(3-hydroxymyristoyl)-b-D-glucosaminyl-1-phosphate + UDP-2,3-b       |
| R-0847 | 0       | R-0847 | 0       | R-0847 | tartrate dehydrogenase                                            | L-tartrate + NAD+ = 2-hydroxy-3-oxosuccinate + NADH + H+                   |
| R-0848 | 0       | R-0848 | 0       | R-0848 | tartrate decarboxylase                                            | L-tartrate = D-glycerate + CO2                                             |
| R-0849 | 0       | R-0849 | 0       | R-0849 | D-malate dehydrogenase [decarboxylating]                          | (R)-malate + NAD+ = CO2 + pyruvate + NADH + H+                             |

|        |         |        |         |        |         |                                                              |                                                                          |
|--------|---------|--------|---------|--------|---------|--------------------------------------------------------------|--------------------------------------------------------------------------|
| R-0850 | 0       | R-0850 | 0       | R-0850 | 0       | precorrin-6A reductase                                       | precorrin-6A + NADPH + H+ = precorrin-6B + NADP+                         |
| R-0851 | 0       | R-0851 | 0       | R-0851 | 0       | adenosyl-cobyrinate synthase                                 | adenosyl-cobyrinate-a,c-diamide + 4 L-glutamine + 4 ATP + 4 H2O = 4 L    |
| R-0852 | 0       | R-0852 | 0       | R-0852 | 0       | adenosylcobinamide-phosphate synthase                        | ATP + adenosyl-cobyrinate + (R)-1-amino-2-propanol-O-2-phosphate = Al    |
| R-0853 | 0       | R-0853 | 0       | R-0853 | 0       | L-threonine-O-3-phosphate decarboxylase                      | L-threonine-O-3-phosphate + (R)-1-amino-2-propanol-O-2-phosphate +       |
| R-0854 | 0       | R-0854 | 0       | R-0854 | 0       | 2-nitropropane dioxygenase                                   | 2,2-nitropropane + O2 = 2 NO2 + 2 acetone + 2 H                          |
| R-0855 | 0       | R-0855 | 0       | R-0855 | 0       | aerobic magnesium-protoporphyrin IX monomethyl ester cyclase | 151-oxo-magnesium-protoporphyrin-IX-13-monomethyl-ester + NADPH          |
| R-0856 | 0       | R-0856 | 0       | R-0856 | 0       | aerobic magnesium-protoporphyrin IX monomethyl ester cyclase | 131-hydroxy-magnesium-protoporphyrin-IX-13-monomethyl-ester + NAC        |
| R-0857 | 0       | R-0857 | 0       | R-0857 | 0       | magnesium protoporphyrin IX methyltransferase                | Mg-protoporphyrin + (S)-adenosyl-L-methionine = (S)-adenosyl-L-homox     |
| R-0858 | 0       | R-0858 | 0       | R-0858 | 0       | protochlorophyllide reductase                                | monovinyl-protochlorophyllide + NADPH + H+ = chlorophyllide + NAD        |
| R-0859 | 0       | R-0859 | 0       | R-0859 | 0       | 3-vinyl bacteriochlorophyllide a hydratase                   | 3-vinyl-bacteriochlorophyllide + H2O = 2-desacetyl-2-hydroxyethyl-bact   |
| R-0860 | 0       | R-0860 | 0       | R-0860 | 0       | chlorophyllide hydratase                                     | chlorophyllide + H2O = 3-hydroxyethylchlorophyllide                      |
| R-0861 | 0       | R-0861 | 0       | R-0861 | 0       | bacteriochlorophyll a synthase                               | bacteriochlorophyllide + all-trans-geranyl-geranyl-diphosphate = geran   |
| R-0862 | 0       | R-0862 | 0       | R-0862 | 0       | geranylgeranyl reductase 1                                   | geranylgeranyl-bacteriochlorophylla + NADPH + H+ = dihydrogeranylg       |
| R-0863 | 0       | R-0863 | 0       | R-0863 | 0       | geranylgeranyl reductase 2                                   | dihydrogeranylgeranyl-bacteriochlorophylla + NADPH + H+ = tetrahydro     |
| R-0864 | 0       | R-0864 | 0       | R-0864 | 0       | geranylgeranyl reductase 3                                   | tetrahydrogeranylgeranyl-bacteriochlorophylla + NADPH + H+ = bacteri     |
| R-0865 | 0       | R-0865 | 0       | R-0865 | 0       | arsenate reductase                                           | arsenate + reduced-glutaredoxin = arsenite + oxidized-glutaredoxin + H2O |
| R-0866 | 0       | R-0866 | 0       | R-0866 | 0       | phosphonate dehydrogenase                                    | phosphonate + NAD+ + H2O = phosphate + NADH + H+                         |
| R-0867 | 0       | R-0867 | 0       | R-0867 | 0       | methylglyoxal reductase                                      | methylglyoxal + NADPH + H+ = acetol + NADP+                              |
| R-0868 | 0       | R-0868 | 0       | R-0868 | 0       | b-keto ester reductase                                       | ethyl-2-methylacetoacetate + NADPH + H+ = ethyl-(2R)-methyl-(3S)-hyc     |
| R-0869 | 0       | R-0869 | 0       | R-0869 | 0       | 2,5-diketo-D-glucuronate reductase A                         | 2,5-dihydro-D-glucuronate + NADPH + H+ = 2-keto-L-glucuronate + NAD      |
| R-0870 | 0       | R-0870 | 0       | R-0870 | 0       | chromate reductase                                           | Cr6+ + 2 NADPH + O2 = Cr3+ + H2O2 + 2 NADP+                              |
| R-0871 | 0       | R-0871 | 0       | R-0871 | 0       | nitrilase                                                    | indole-3-acetonitrile + 2 H2O = NH3 + indole-3-acetate + H+              |
| R-0872 | 0       | R-0872 | 0       | R-0872 | 0       | neurosporene dehydratase                                     | neurosporene + H2O = hydroxyneurosporene                                 |
| R-0873 | 0.0001  | R-0873 | 0       | R-0873 | 0       | hydroxyneurosporene synthase 1                               | trans-lycopene + H2O = rhodopin                                          |
| R-0874 | 0.0001  | R-0874 | 0       | R-0874 | 0       | hydroxyneurosporene synthase 2                               | anhydrohodovbrin + H2O = rhodovbrin                                      |
| R-0875 | 0       | R-0875 | 0       | R-0875 | 0       | hydroxyneurosporene synthase 3                               | 3,4-dihydroanhydrohodovbrin + H2O = 3',4'-dihydrohodovbrin               |
| R-0876 | 0       | R-0876 | 0       | R-0876 | 0       | aerobic magnesium-protoporphyrin IX monomethyl ester cyclase | Mg-protoporphyrin-monomethyl-ester + NADPH + O2 + H+ = 131-hydro         |
| R-0877 | 0       | R-0877 | 0       | R-0877 | 0       | 3,8-divinyl protochlorophyllide 8-vinyl reductase            | divinyl-protochlorophyllide + NADPH + H+ = monovinyl-protochlorophyl     |
| R-0878 | 0       | R-0878 | 0       | R-0878 | 0       | molybdopterin adenylyltransferase                            | ATP + molybdopterin = molybdopterin-AMP + diphosphate                    |
| R-0879 | 0       | R-0879 | 0       | R-0879 | 0       | 3-hydroxyacyl-CoA epimerase (n-4:0)                          | (S)-3-hydroxybutanoyl-CoA = (R)-3-hydroxybutanoyl-CoA                    |
| R-0880 | 0       | R-0880 | 0       | R-0880 | 0       | 3-hydroxyacyl-CoA epimerase (n-6:0)                          | (3S)-3-hydroxyhexanoyl-CoA = (3R)-3-hydroxyhexanoyl-CoA                  |
| R-0881 | 0       | R-0881 | 0       | R-0881 | 0       | 3-hydroxyacyl-CoA epimerase (n-8:0)                          | (3S)-3-hydroxyoctanoyl-CoA = (3R)-3-hydroxyoctanoyl-CoA                  |
| R-0882 | 0       | R-0882 | 0       | R-0882 | 0       | 3-hydroxyacyl-CoA epimerase (n-12:0)                         | (3S)-3-hydroxydodecanoyl-CoA = (3R)-3-hydroxydodecanoyl-CoA              |
| R-0883 | 0       | R-0883 | 0       | R-0883 | 0       | 3-hydroxyacyl-CoA epimerase (n-14:0)                         | (3S)-3-hydroxytetradecanoyl-CoA = (3R)-3-hydroxytetradecanoyl-CoA        |
| R-0884 | 0       | R-0884 | 0       | R-0884 | 0       | 3-hydroxyacyl-CoA epimerase (n-16:0)                         | (3S)-3-hydroxyhexadecanoyl-CoA = (3R)-3-hydroxyhexadecanoyl-CoA          |
| R-0885 | 0       | R-0885 | 0       | R-0885 | 0       | 3-hydroxyacyl-CoA epimerase (n-18:0)                         | (3S)-3-hydroxyoctadecanoyl-CoA = (3R)-3-hydroxyoctadecanoyl-CoA          |
| R-0886 | 0       | R-0886 | 0       | R-0886 | 0       | 3-hydroxyacyl-CoA epimerase (n-12:1)                         | (3S)-3-hydroxy-cis-dodec-5-enoyl-CoA = (3R)-3-hydroxy-cis-dodec-5-en     |
| R-0887 | 0       | R-0887 | 0       | R-0887 | 0       | 3-hydroxyacyl-CoA epimerase (n-14:1)                         | (3S)-3-hydroxy-cis-tetradec-7-enoyl-CoA = (3R)-3-hydroxy-cis-tetradec-   |
| R-0888 | 0       | R-0888 | 0       | R-0888 | 0       | 3-hydroxyacyl-CoA epimerase (n-16:1)                         | (3S)-3-hydroxy-cis-hexadec-9-enoyl-CoA = (3R)-3-hydroxy-cis-hexadec-     |
| R-0889 | 0       | R-0889 | 0       | R-0889 | 0       | 3-hydroxyacyl-CoA epimerase (n-18:1)                         | (3S)-3-hydroxy-cis-octadec-11-enoyl-CoA = (3R)-3-hydroxy-cis-octadec-    |
| R-0890 | 0       | R-0890 | 0       | R-0890 | 0       | 3-hydroxyacyl-CoA dehydrogenase (n-4:0)                      | (S)-3-hydroxybutanoyl-CoA + NAD+ = acetoacetyl-CoA + NADH + H+           |
| R-0891 | -0.0024 | R-0891 | -0.0014 | R-0891 | -0.0014 | 3-hydroxyacyl-CoA dehydrogenase (n-6:0)                      | (S)-3-hydroxyhexanoyl-CoA + NAD+ = 3-oxohexanoyl-CoA + NADH + H          |
| R-0892 | -0.0024 | R-0892 | -0.0014 | R-0892 | -0.0014 | 3-hydroxyacyl-CoA dehydrogenase (n-8:0)                      | (S)-3-hydroxyoctanoyl-CoA + NAD+ = 3-oxooctanoyl-CoA + NADH + H          |
| R-0893 | -0.0024 | R-0893 | -0.0014 | R-0893 | -0.0014 | 3-hydroxyacyl-CoA dehydrogenase (n-12:0)                     | (S)-3-hydroxydodecanoyl-CoA + NAD+ = 3-oxododecanoyl-CoA + NAC           |
| R-0894 | -0.0024 | R-0894 | -0.0014 | R-0894 | -0.0014 | 3-hydroxyacyl-CoA dehydrogenase (n-14:0)                     | (S)-3-hydroxytetradecanoyl-CoA + NAD+ = 3-oxotetradecanoyl-CoA +         |
| R-0895 | -0.0024 | R-0895 | -0.0014 | R-0895 | -0.0014 | 3-hydroxyacyl-CoA dehydrogenase (n-16:0)                     | (S)-3-hydroxyhexadecanoyl-CoA + NAD+ = 3-oxohexadecanoyl-CoA +           |
| R-0896 | -0.0012 | R-0896 | -0.0007 | R-0896 | -0.0007 | 3-hydroxyacyl-CoA dehydrogenase (n-18:0)                     | (S)-3-hydroxyoctadecanoyl-CoA + NAD+ = 3-oxooctadecanoyl-CoA + t         |
| R-0897 | 0       | R-0897 | 0       | R-0897 | 0       | 3-hydroxyacyl-CoA dehydrogenase (n-12:1)                     | (3S)-3-hydroxy-cis-dodec-5-enoyl-CoA + NAD+ = 3-oxo-cis-dodec-5-enc      |
| R-0898 | 0       | R-0898 | 0       | R-0898 | 0       | 3-hydroxyacyl-CoA dehydrogenase (n-14:1)                     | (3S)-3-hydroxy-cis-tetradec-7-enoyl-CoA + NAD+ = 3-oxo-cis-tetradec-7    |
| R-0899 | 0       | R-0899 | 0       | R-0899 | 0       | 3-hydroxyacyl-CoA dehydrogenase (n-16:1)                     | (3S)-3-hydroxy-cis-hexadec-9-enoyl-CoA + NAD+ = 3-oxo-cis-hexadec-       |
| R-0900 | 0       | R-0900 | 0       | R-0900 | 0       | 3-hydroxyacyl-CoA dehydrogenase (n-18:1)                     | (3S)-3-hydroxy-cis-octadec-11-enoyl-CoA + NAD+ = 3-oxo-cis-octadec-      |
| R-0901 | 0       | R-0901 | 0       | R-0901 | 0       | enoyl-CoA isomerase (n-6:0)                                  | trans-hex-2-enoyl-CoA = cis-hex-3-enoyl-CoA                              |
| R-0902 | 0       | R-0902 | 0       | R-0902 | 0       | enoyl-CoA isomerase (n-8:0)                                  | trans-oct-2-enoyl-CoA = cis-oct-3-enoyl-CoA                              |
| R-0903 | 0       | R-0903 | 0       | R-0903 | 0       | enoyl-CoA isomerase (n-12:0)                                 | trans-dodec-2-enoyl-CoA = cis-dodec-3-enoyl-CoA                          |
| R-0904 | 0       | R-0904 | 0       | R-0904 | 0       | enoyl-CoA isomerase (n-14:0)                                 | trans-tetradec-2-enoyl-CoA = cis-tetradec-3-enoyl-CoA                    |
| R-0905 | 0       | R-0905 | 0       | R-0905 | 0       | enoyl-CoA isomerase (n-16:0)                                 | trans-hexadec-2-enoyl-CoA = cis-hexadec-3-enoyl-CoA                      |
| R-0906 | 0       | R-0906 | 0       | R-0906 | 0       | enoyl-CoA isomerase (n-18:0)                                 | trans-octadec-2-enoyl-CoA = cis-octadec-3-enoyl-CoA                      |
| R-0907 | 0       | R-0907 | 0       | R-0907 | 0       | enoyl-CoA isomerase (n-12:1)                                 | trans-2-cis-5-dodecenoyl-CoA = cis-3-cis-5-dodecenoyl-CoA                |
| R-0908 | 0       | R-0908 | 0       | R-0908 | 0       | enoyl-CoA isomerase (n-14:1)                                 | trans-2-cis-7-tetradecenoyl-CoA = cis-3-cis-7-tetradecenoyl-CoA          |
| R-0909 | 0       | R-0909 | 0       | R-0909 | 0       | enoyl-CoA isomerase (n-16:1)                                 | trans-2-cis-9-hexadecenoyl-CoA = cis-3-cis-9-hexadecenoyl-CoA            |
| R-0910 | 0       | R-0910 | 0       | R-0910 | 0       | enoyl-CoA isomerase (n-18:1)                                 | trans-2-cis-11-octadecenoyl-CoA = cis-3-cis-11-octadecenoyl-CoA          |
| R-0911 | 0       | R-0911 | 0       | R-0911 | 0       | enoyl-CoA isomerase (n-4:0)                                  | crotonyl-CoA = vinylacetyl-CoA                                           |
| R-0913 | -0.0024 | R-0913 | -0.0014 | R-0913 | -0.0014 | 3-ketoacyl-CoA thiolase (n-6:0)                              | 3-oxohexanoyl-CoA + CoA = acetyl-CoA + butyryl-CoA                       |
| R-0914 | -0.0024 | R-0914 | -0.0014 | R-0914 | -0.0014 | 3-ketoacyl-CoA thiolase (n-8:0)                              | 3-oxooctanoyl-CoA + CoA = acetyl-CoA + hexanoyl-CoA                      |
| R-0915 | -0.0024 | R-0915 | -0.0014 | R-0915 | -0.0014 | 3-ketoacyl-CoA thiolase (n-10:0)                             | 3-oxodecanoyl-CoA + CoA = acetyl-CoA + octanoyl-CoA                      |
| R-0916 | -0.0024 | R-0916 | -0.0014 | R-0916 | -0.0014 | 3-ketoacyl-CoA thiolase (n-12:0)                             | 3-oxododecanoyl-CoA + CoA = acetyl-CoA + decanoyl-CoA                    |
| R-0917 | -0.0024 | R-0917 | -0.0014 | R-0917 | -0.0014 | 3-ketoacyl-CoA thiolase (n-14:0)                             | 3-oxotetradecanoyl-CoA + CoA = acetyl-CoA + dodecanoyl-CoA               |
| R-0918 | -0.0012 | R-0918 | -0.0007 | R-0918 | -0.0007 | 3-ketoacyl-CoA thiolase (n-16:0)                             | 3-oxohexadecanoyl-CoA + CoA = acetyl-CoA + tetradecanoyl-CoA             |
| R-0919 | -0.0012 | R-0919 | -0.0007 | R-0919 | -0.0007 | 3-ketoacyl-CoA thiolase (n-18:0)                             | 3-oxooctadecanoyl-CoA + CoA = acetyl-CoA + hexadecanoyl-CoA              |
| R-0920 | 0       | R-0920 | 0       | R-0920 | 0       | 3-ketoacyl-CoA thiolase (n-12:1)                             | 3-oxo-cis-dodec-5-enoyl-CoA + CoA = acetyl-CoA + cis-dec-3-enoyl-CoA     |
| R-0921 | 0       | R-0921 | 0       | R-0921 | 0       | 3-ketoacyl-CoA thiolase (n-14:1)                             | 3-oxo-cis-tetradec-7-enoyl-CoA + CoA = acetyl-CoA + cis-dodec-5-en       |
| R-0922 | 0       | R-0922 | 0       | R-0922 | 0       | 3-ketoacyl-CoA thiolase (n-16:1)                             | 3-oxo-cis-hexadec-9-enoyl-CoA + CoA = acetyl-CoA + cis-tetradec-7-en     |
| R-0923 | 0       | R-0923 | 0       | R-0923 | 0       | 3-ketoacyl-CoA thiolase (n-18:1)                             | 3-oxo-cis-octadec-11-enoyl-CoA + CoA = acetyl-CoA + hexadec-9-en         |
| R-0924 | 0       | R-0924 | 0       | R-0924 | 0       | enoyl-CoA isomerase (n-10:0)                                 | trans-dec-2-enoyl-CoA = cis-dec-2-enoyl-CoA                              |
| R-0925 | -0.0024 | R-0925 | -0.0014 | R-0925 | -0.0014 | 3-hydroxyacyl-CoA dehydrogenase (n-10:0)                     | (3S)-3-hydroxydecanoyl-CoA + NAD+ = 3-oxodecanoyl-CoA + NADH +           |
| R-0926 | 0       | R-0926 | 0       | R-0926 | 0       | 3-hydroxyacyl-CoA epimerase (n-10:0)                         | (3S)-3-hydroxydecanoyl-CoA = (3R)-3-hydroxydecanoyl-CoA                  |
| R-0927 | -0.0024 | R-0927 | -0.0014 | R-0927 | -0.0014 | enoyl-CoA hydratase (n-10:0)                                 | trans-dec-2-enoyl-CoA + H2O = (3S)-3-hydroxydecanoyl-CoA                 |
| R-0928 | 0       | R-0928 | 0       | R-0928 | 0       | 2-octaprenyl-3-methyl-6-methoxy-1,4-benzoquinone hydroxylase | 2-octaprenyl-3-methyl-6-methoxy-1,4-benzoquinol + O2 + H+ = 3-demet      |
| R-0929 | 0       | R-0929 | 0       | R-0929 | 0       | L-sorbose to L-sorbose-2,6-lactone (spontaneous)             | L-sorbose = L-sorbose-2,6-lactone                                        |
| R-0930 | 0.0002  | R-0930 | 0.0017  | R-0930 | 0.0017  | pantothenate synthetase                                      | b-alanine + L-pantoic + ATP = (R)-pantothenate + AMP                     |
| R-0931 | 0.0002  | R-0931 | 0.0003  | R-0931 | 0.0003  | phosphatidylglycerophosphate (n-16:1)                        | phosphatidylglycerophosphate(dihexadec-9-enoyl) + H2O = phosphate + c    |
| R-0932 | 0.0002  | R-0932 | 0.0003  | R-0932 | 0.0003  | phosphatidylglycerophosphate (n-18:1)                        | phosphatidylglycerophosphate(dihexadec-9-enoyl) + H2O = phosphate        |
| R-0933 | 0.0002  | R-0933 | 0.0003  | R-0933 | 0.0003  | phosphatidylglycerophosphate (n-18:0)                        | phosphatidylglycerophosphate(dioctadecanoyl) + H2O = phosphate + p       |
| R-0934 | 0.0002  | R-0934 | 0.0017  | R-0934 | 0.0017  | phosphatidylglycerophosphate (n-18:1)                        | phosphatidylglycerophosphate(dioctadec-9-enoyl) + H2O = phosphate +      |
| R-0935 | 0.0002  | R-0935 | 0.0003  | R-0935 | 0.0003  | protoporphyrinogen IX oxidase                                | protoporphyrinogen-IX + 3 O2 = protoporphyrin-IX + 3 H2O2                |
| R-0936 | 0.0029  | R-0936 | 0.0017  | R-0936 | 0.0017  | 1-amino-propan-2-one-3-phosphate synthetase                  | (2S)-2-amino-3-oxo-4-phosphonoxybutanoate = 1-amino-propan-2-one         |
| R-0937 | 0       | R-0937 | 0       | R-0937 | 0       | riboflavin kinase                                            | riboflavin + ATP = ADP + FMN                                             |
| R-0938 | 0       | R-0938 | 0       | R-0938 | 0       | FMN adenylyltransferase                                      | ATP + FMN = diphosphate + FAD                                            |
| R-0939 | 0       | R-0939 | 0       | R-0939 | 0       | UDP-2,3-bis(3-hydroxymeristoyl)glucosamine hydrolase         | UDP-2,3-bis(3-hydroxymeristoyl)glucosamine + H2O = 2,3-bis(3-hydrox      |
| R-0940 | 0       | R-0940 | 0       | R-0940 | 0       | cob(I)lyrinic acid a,c-diamide adenosyltransferase           | cob(I)lyrinic acid + ATP = adenosyl-cobyrinate-a,c-diamide + tri         |
| R-0941 | 0       | R-0941 | 0       | R-0941 | 0       | cob(II)lyrinic acid a,c-diamide reductase                    | cob(II)lyrinic acid + FMNH2 = cob(II)lyrinic acid-a,c-diamide + FMN      |
| R-0942 | 0       | R-0942 | 0       | R-0942 | 0       | a-ribazole-5'-phosphate phosphatase                          | adenosylcobalamine-5'-phosphate + H2O = coenzyme-B12 + phosphate         |
| R-0943 | 0       | R-0943 | 0       | R-0943 | 0       | adenosylcobalamine-5'-phosphate phosphatase                  | L-threonine + ATP = L-threonine-O-3-phosphate + ADP                      |
| R-0944 | 0       | R-0944 | 0       | R-0944 | 0       | L-threonine kinase                                           | FMNH2 + O2 = 2 dimethylbenzimidazole + D-erythrose-4-phosphate + t       |
| R-0945 | 0       | R-0945 | 0       | R-0945 | 0       | flavin destructure                                           | L-glutamate + N-succinyl-2-amino-6-ketopimelate = 2-oxoglutarate + N-    |
| R-0946 | 0       | R-0946 | 0       | R-0946 | 0       | N-succinyl-2-amino-6-ketopimelate aminotransferase           | L-asparagine[p] + H2O[p] = L-aspartate[p] + NH3[p]                       |
| R-0947 | 0       | R-0947 | 0       | R-0947 | 0       | L-asparagine (periplasm)                                     | 2 superoxide[p] + 2 H+[p] = H2O2[p] + O2[p]                              |
| R-0948 | 0.0479  | R-0948 | 0.0283  | R-0948 | 0.0283  | superoxide dismutase (periplasm)                             | D-galactose[e] + O2[e] = D-galacto-hexodialdose[e] + H2O2[e]             |
| R-0949 | 0       | R-0949 | 0       | R-0949 | 0       | galactose oxidase (extracellular)                            | phytoene[e] + reduced-electron-acceptor[e] + O2[e] = phytofluene[e] + o  |
| R-0950 | 0       | R-0950 | 0       | R-0950 | 0       | phytoene dehydrogenase 1 (extracellular)                     | phytofluene[e] + reduced-electron-acceptor[e] + O2[e] = zeta-carotene[e] |
| R-0951 | 0       | R-0951 | 0       | R-0951 | 0       | phytoene dehydrogenase 2 (extracellular)                     | zeta-carotene[e] + reduced-electron-acceptor[e] + O2[e] = neurosporene   |
| R-0952 | 0       | R-0952 | 0       | R-0952 | 0       | zeta-carotene desaturase 1 (extracellular)                   | neurosporene[e] + reduced-electron-acceptor[e] + O2[e] = trans-lycop     |
| R-0953 | 0       | R-0953 | 0       | R-0953 | 0       | zeta-carotene desaturase 2 (extracellular)                   | dATP + H2O = dAMP + diphosphate                                          |
| R-0954 | 0       | R-0954 | 0       | R-0954 | 0       | deoxynucleoside triphosphate pyrophosphohydrolase (dATP)     | dGTP + H2O = dTMP + diphosphate                                          |
| R-0955 | 0       | R-0955 | 0       | R-0955 | 0       | deoxynucleoside triphosphate pyrophosphohydrolase (dGTP)     | dCTP + H2O = dCMP + diphosphate                                          |
| R-0956 | 0       | R-0956 | 0       | R-0956 | 0       | deoxynucleoside triphosphate pyrophosphohydrolase (dCTP)     | dCTP + H2O = dCMP + diphosphate                                          |
| R-0957 | 0       | R-0957 | 0       | R-0957 | 0       | deoxynucleoside triphosphate pyrophosphohydrolase (dCTP)     | dCTP + H2O = dCMP + diphosphate                                          |
| R-0958 | 0       | R-0958 | 0       | R-0958 | 0       | NADH-azoreductase                                            | methyl-red + 2 NADH + 2 H+ = anthranilate + N,N'-dimethyl-p-phenyle      |
| R-0959 | 0       | R-0959 | 0       | R-0959 | 0       | acetyldehyde dehydrogenase                                   | acetaldehyde + NADP+ + H2O = acetate + NADPH + H+                        |
| R-0960 | 0       | R-0960 | 0       | R-0960 | 0       | beta-glucosidase                                             | short-glucan(y) + y H2O = y b-D-glucose                                  |
| R-0961 | 0       | R-0961 | 0       | R-0961 | 0       | 2-acetolactate decarboxylation                               | 2-acetolactate = CO2 + 2 H+ + diacetyl                                   |
| R-0962 | 0       | R-0962 | 0       | R-0962 | 0       | 5-methylthioribose-1-phosphate isomerase                     | (S)-methyl-5-thio-alpha-D-ribose-1-phosphate = (S)-methyl-5-thio-D-ribu  |
| R-0963 | 0.0135  | R-0963 | 0.008   | R-0963 | 0.008   | S-adenosylmethionine decarboxylase                           | (S)-adenosyl-L-methionine = CO2 + (S)-adenosylmethioninamine             |
| R-0964 | 0       | R-0964 | 0       | R-0964 | 0       | adenylsulfate kinase                                         | adenosine-5'-phosphosulfate + ATP = phosphoadenosine-5'-phospho          |
| R-0965 | 0.0135  | R-0965 | 0.008   | R-0965 | 0.008   | nitrate reductase assimilatory                               | NO3- + NADPH + H+ = NO2- + NADP+ + H2O                                   |
| R-0966 | 0       | R-0966 | 0       | R-0966 | 0       | adenosine-3'(2',5')-bisphosphate nucleotidase                | adenosine-3'-5'-bisphosphate + H2O = phosphate + AMP                     |
| R-0967 | 0       |        |         |        |         |                                                              |                                                                          |

|        |          |        |          |        |                                                                            |                                                                                                                                                 |
|--------|----------|--------|----------|--------|----------------------------------------------------------------------------|-------------------------------------------------------------------------------------------------------------------------------------------------|
| R-0996 | 0.0028   | R-0996 | 0.0017   | R-0996 | aspartate 1-decarboxylase                                                  | L-aspartate = b-alanine + CO2                                                                                                                   |
| R-0997 | 0        | R-0997 | 0        | R-0997 | molybdopterin-synthase activations                                         | sulfurated-sulfur-donor + molybdopterin-synthase = sulfurated-molybdopterin                                                                     |
| R-0998 | 0        | R-0998 | 0        | R-0998 | erythronate-4-phosphate dehydrogenase                                      | erythronate-4-phosphate + NAD+ = 2-oxo-3-hydroxy-4-phosphobutanoate                                                                             |
| R-0999 | 0        | R-0999 | 0        | R-0999 | erythrose 4-phosphate dehydrogenase                                        | D-erythrose-4-phosphate + NAD+ + H2O = erythronate-4-phosphate + H+                                                                             |
| R-1000 | 0        | R-1000 | 0        | R-1000 | glycine oxidase 5                                                          | glycine + O2 = iminoglycine + H2O2                                                                                                              |
| R-1001 | 0        | R-1001 | 0        | R-1001 | thiamin biosynthesis 1                                                     | thiS + ATP = adenylyated-thiS + diphosphate                                                                                                     |
| R-1002 | 0        | R-1002 | 0        | R-1002 | thiamin biosynthesis 2                                                     | thiI + L-cysteine = thiI-persulfide + L-alanine                                                                                                 |
| R-1003 | 0        | R-1003 | 0        | R-1003 | thiamin biosynthesis 3                                                     | adenylyated-thiS + thiI-persulfide = thiS-thiI-acyl-disulfide + AMP                                                                             |
| R-1004 | 0        | R-1004 | 0        | R-1004 | thiamin biosynthesis 4                                                     | thiS-thiI-acyl-disulfide + thiF = thiS-thiF-acyl-disulfide + thiI                                                                               |
| R-1005 | 0        | R-1005 | 0        | R-1005 | debranched-limit dextrin phosphorylase                                     | debranched-limit-dextrin + n phosphate = n D-glucose-1-phosphate                                                                                |
| R-1006 | 0.0005   | R-1006 | 0.0003   | R-1006 | NAD kinase                                                                 | NAD+ + ATP = NADP+ + ADP                                                                                                                        |
| R-1007 | 0        | R-1007 | 0        | R-1007 | photosystem I                                                              | 2 oxidized-ferredoxin + 2 reduced-cytochrome-c + photon = 2 reduced-ferredoxin + 2 reduced-cytochrome-c                                         |
| R-1008 | 0        | R-1008 | 0        | R-1008 | sulfur oxidation enzyme system                                             | thiosulfate[p] + 5 H2O[p] + oxidized-cytochrome-c = 2 SO42-[p] + 10 H+                                                                          |
| R-1009 | 0        | R-1009 | 0        | R-1009 | formaldehyde dehydrogenase                                                 | formaldehyde[p] + 2 oxidized-cytochrome-c = formate[p] + 2 H+[p] + 2 reduced-cytochrome-c                                                       |
| R-1010 | 0        | R-1010 | 0        | R-1010 | aldose sugar dehydrogenase (D-arabinose)                                   | D-arabinose[p] + 2 oxidized-cytochrome-c = D-arabinono-1,4-lactone[p]                                                                           |
| R-1011 | 0        | R-1011 | 0        | R-1011 | aldose sugar dehydrogenase (L-arabinose)                                   | L-arabinose[p] + 2 oxidized-cytochrome-c = L-arabinono-1,4-lactone[p]                                                                           |
| R-1012 | 0        | R-1012 | 0        | R-1012 | D-arabinolactonase                                                         | D-arabinono-1,4-lactone[p] + H2O[p] = D-arabinonate[p]                                                                                          |
| R-1013 | 0        | R-1013 | 0        | R-1013 | L-arabinolactonase                                                         | L-arabinono-1,4-lactone[p] + H2O[p] = L-arabinonate[p]                                                                                          |
| R-1014 | 0        | R-1014 | 0        | R-1014 | aldose sugar dehydrogenase (L-xylose)                                      | L-xylose[p] + 2 oxidized-cytochrome-c = L-xylo-1,4-lactone[p] + 2 H+[p]                                                                         |
| R-1015 | 0        | R-1015 | 0        | R-1015 | L-xyloactonase                                                             | L-xylo-1,4-lactone[p] + H2O[p] = L-xylo-1,4-lactonate[p]                                                                                        |
| R-1016 | 0        | R-1016 | 0        | R-1016 | aldose sugar dehydrogenase (D-xylose)                                      | D-xylose[p] + 2 oxidized-cytochrome-c = D-xylo-1,4-lactone[p] + 2 H+[p]                                                                         |
| R-1017 | 0        | R-1017 | 0        | R-1017 | D-xyloactonase                                                             | D-xylo-1,4-lactone[p] + H2O[p] = D-xylo-1,4-lactonate[p]                                                                                        |
| R-1018 | 0        | R-1018 | 0        | R-1018 | aldose sugar dehydrogenase (D-ribose)                                      | D-ribose[p] + 2 oxidized-cytochrome-c = D-ribono-1,4-lactone[p] + 2 H+[p]                                                                       |
| R-1019 | 0        | R-1019 | 0        | R-1019 | D-ribolactonase                                                            | D-ribono-1,4-lactone[p] + H2O[p] = D-ribonate[p]                                                                                                |
| R-1020 | 0        | R-1020 | 0        | R-1020 | aldose sugar dehydrogenase (2-deoxy-D-ribose)                              | 2-deoxy-D-ribose[p] + 2 oxidized-cytochrome-c = 2-deoxy-D-ribono-1,4-lactone[p] + 2 H+[p]                                                       |
| R-1021 | 0        | R-1021 | 0        | R-1021 | 2-deoxy-D-ribolactonase                                                    | 2-deoxy-D-ribono-1,4-lactone[p] + H2O[p] = 2-deoxy-D-ribonate[p]                                                                                |
| R-1022 | 0        | R-1022 | 0        | R-1022 | aldose sugar dehydrogenase (3-O-b-D-galactopyranosyl-D-arabinose)          | 3-O-b-D-galactopyranosyl-D-arabinono-1,4-lactone[p] + 2 oxidized-cytochrome-c = 3-O-b-D-galactopyranosyl-D-arabinono-1,4-lactonate[p] + 2 H+[p] |
| R-1023 | 0        | R-1023 | 0        | R-1023 | 3-O-b-D-galactopyranosyl-D-arabinolactonase                                | 3-O-b-D-galactopyranosyl-D-arabinono-1,4-lactone[p] + H2O[p] = 3-O-b-D-galactopyranosyl-D-arabinono-1,4-lactonate[p]                            |
| R-1024 | 0        | R-1024 | 0        | R-1024 | ethylamine dehydrogenase                                                   | ethylamine[p] + oxidized-aminocyanin + H2O[p] = acetaldehyde[p] + NH3[p]                                                                        |
| R-1025 | 0        | R-1025 | 0        | R-1025 | amicyanin oxidation                                                        | 2 oxidized-cytochrome-c + reduced-aminocyanin = 2 reduced-cytochrome-c + reduced-ferredoxin + 2 H+ + UQ = 2 oxidized-ferredoxin + UQH2          |
| R-1026 | 0        | R-1026 | 0        | R-1026 | photosystem I cyclic                                                       | 2-amino-2-deoxyisochlorismate synthase                                                                                                          |
| R-1027 | 0        | R-1027 | 0        | R-1027 | 2-amino-2-deoxyisochlorismate synthase                                     | 2-amino-2-deoxyisochlorismate + H2O = trans-2,3-dihydro-3-hydroxy-2-amino-2-deoxyisochlorismate                                                 |
| R-1028 | 0        | R-1028 | 0        | R-1028 | 2-amino-2-deoxyisochlorismate hydrolase                                    | carbamate + H+ = NH3 + CO2                                                                                                                      |
| R-1029 | 0        | R-1029 | 0        | R-1029 | carbamate degradation (spontaneous)                                        | D-lactate + 2 oxidized-cytochrome-c = pyruvate + 2 H+ + 2 reduced-cytochrome-c                                                                  |
| R-1030 | 0        | R-1030 | 0        | R-1030 | D-lactate dehydrogenase (cytochrome)                                       | (S)-lactate + NAD+ = pyruvate + NADH + H+                                                                                                       |
| R-1031 | 0        | R-1031 | 0        | R-1031 | S-lactate dehydrogenase                                                    | 1,2-propanediol[p] + 4 oxidized-cytochrome-c = (S)-lactate[p] + 4 H+[p] + 4 reduced-cytochrome-c                                                |
| R-1032 | 0        | R-1032 | 0        | R-1032 | 1,2-propanediol dehydrogenase                                              | methanol[e] = methanol[p]                                                                                                                       |
| R-5001 | 0        | R-5001 | 0        | R-5001 | methanol transport via diffusion (extracellular to periplasm)              | formaldehyde[p] = formaldehyde                                                                                                                  |
| R-5002 | 0        | R-5002 | 0        | R-5002 | formaldehyde transport via diffusion (periplasm to cytoplasm)              | CO2[e] = CO2[p]                                                                                                                                 |
| R-5003 | -60.1211 | R-5003 | -63.1796 | R-5003 | CO2 transport via diffusion (extracellular to periplasm)                   | CO2[p] = CO2                                                                                                                                    |
| R-5004 | -60.1211 | R-5004 | -39.9542 | R-5004 | CO2 transport via diffusion (periplasm to cytoplasm)                       | O2[e] = O2[p]                                                                                                                                   |
| R-5005 | 9.2224   | R-5005 | 12.3621  | R-5005 | O2 transport via diffusion (extracellular to periplasm)                    | O2[p] = O2                                                                                                                                      |
| R-5006 | 9.2224   | R-5006 | 12.3621  | R-5006 | O2 transport via diffusion (periplasm to cytoplasm)                        | formaldehyde[e] = formaldehyde[p]                                                                                                               |
| R-5007 | 0        | R-5007 | 0        | R-5007 | formaldehyde transport via diffusion (extracellular to periplasm)          | phosphate[e] = phosphate[p]                                                                                                                     |
| R-5008 | 0.2256   | R-5008 | 0.1333   | R-5008 | phosphate transport via diffusion (extracellular to periplasm)             | phosphate[p] + ATP + H2O = 2 phosphate + ADP                                                                                                    |
| R-5009 | 0        | R-5009 | 0        | R-5009 | phosphate ABC transporter                                                  | NH3[e] = NH3[p]                                                                                                                                 |
| R-5010 | 1.7869   | R-5010 | 1.0561   | R-5010 | NH3 transport via diffusion (extracellular to periplasm)                   | NH3[p] + H+[p] = NH3 + H+                                                                                                                       |
| R-5011 | 1.7869   | R-5011 | 1.0561   | R-5011 | NH3 transport (periplasm to cytoplasm)                                     | succinate[e] = succinate[p]                                                                                                                     |
| R-5012 | 0        | R-5012 | 0        | R-5012 | succinate transport via diffusion (extracellular to periplasm)             | succinate[p] = succinate                                                                                                                        |
| R-5013 | 0        | R-5013 | 0        | R-5013 | succinate symport (periplasm to cytoplasm)                                 | fumarate[e] = fumarate[p]                                                                                                                       |
| R-5014 | 0        | R-5014 | 0        | R-5014 | fumarate transport via diffusion (extracellular to periplasm)              | fumarate[p] = fumarate                                                                                                                          |
| R-5015 | 0        | R-5015 | 0        | R-5015 | fumarate symport (periplasm to cytoplasm)                                  | citrate[e] = citrate[p]                                                                                                                         |
| R-5016 | 0        | R-5016 | 0        | R-5016 | citrate transport via diffusion (extracellular to periplasm)               | citrate[p] = citrate                                                                                                                            |
| R-5017 | 0        | R-5017 | 0        | R-5017 | citrate symport (periplasm to cytoplasm)                                   | glycolate[e] = glycolate[p]                                                                                                                     |
| R-5018 | 0        | R-5018 | 0        | R-5018 | glycolate transport via diffusion (extracellular to periplasm)             | glycolate[p] = glycolate                                                                                                                        |
| R-5019 | 0        | R-5019 | 0        | R-5019 | glycolate symport (periplasm to cytoplasm)                                 | formate[e] = formate[p]                                                                                                                         |
| R-5020 | 0        | R-5020 | 0        | R-5020 | formate transport via diffusion (extracellular to periplasm)               | formate[p] = formate                                                                                                                            |
| R-5021 | 33.8     | R-5021 | 10.5746  | R-5021 | formate symport (periplasm to cytoplasm)                                   | oxalate[e] = oxalate[p]                                                                                                                         |
| R-5022 | 33.8     | R-5022 | 33.8     | R-5022 | oxalate transport via diffusion (extracellular to periplasm)               | oxalate[p] + formate = oxalate + formate[p]                                                                                                     |
| R-5023 | 33.8     | R-5023 | 33.8     | R-5023 | oxalate/formate antiporter (periplasm to cytoplasm)                        | acetate[e] = acetate[p]                                                                                                                         |
| R-5024 | 0        | R-5024 | 0        | R-5024 | acetate transport via diffusion (extracellular to periplasm)               | acetate[p] = acetate                                                                                                                            |
| R-5025 | 0        | R-5025 | 0        | R-5025 | sodium/acetate symporter (periplasm to cytoplasm)                          | D-gluconate[e] = D-gluconate[p]                                                                                                                 |
| R-5026 | 0        | R-5026 | 0        | R-5026 | D-gluconate transport via diffusion (extracellular to periplasm)           | D-gluconate[p] = D-gluconate                                                                                                                    |
| R-5027 | 0        | R-5027 | 0        | R-5027 | H+/gluconate symporter                                                     | putrescine[e] = putrescine[p]                                                                                                                   |
| R-5028 | 0        | R-5028 | 0        | R-5028 | putrescine transport via diffusion (extracellular to periplasm)            | putrescine[p] + ATP + H2O = putrescine + ADP + phosphate                                                                                        |
| R-5029 | 0        | R-5029 | 0        | R-5029 | putrescine ABC transporter                                                 | 2-oxoglutarate[e] = 2-oxoglutarate[p]                                                                                                           |
| R-5030 | 0        | R-5030 | 0        | R-5030 | a-ketoglutarate transport via diffusion (extracellular to periplasm)       | 2-oxoglutarate[p] = 2-oxoglutarate                                                                                                              |
| R-5031 | 0        | R-5031 | 0        | R-5031 | a-ketoglutarate MFS transporter                                            | phosphate[e] + H+[p] = phosphate + H+                                                                                                           |
| R-5032 | 0.2256   | R-5032 | 0.1333   | R-5032 | PIT phosphate transporter                                                  | SO42-[e] = SO42-[p]                                                                                                                             |
| R-5033 | 0.0143   | R-5033 | 0.0084   | R-5033 | sulfate transport via diffusion (extracellular to periplasm)               | SO42-[p] + Na+[p] = SO42- + Na+                                                                                                                 |
| R-5034 | 0.0143   | R-5034 | 0.0084   | R-5034 | sodium/sulphate symporter                                                  | Na+[e] = Na+[p]                                                                                                                                 |
| R-5035 | 0.0008   | R-5035 | 0.0004   | R-5035 | sodium transport via diffusion (extracellular to periplasm)                | thiosulfate[e] = thiosulfate[p]                                                                                                                 |
| R-5036 | 0        | R-5036 | 0        | R-5036 | thiosulfate transport via diffusion (extracellular to periplasm)           | SO42-[p] + ATP + H2O = SO42- + phosphate + ADP                                                                                                  |
| R-5037 | 0        | R-5037 | 0        | R-5037 | sulfate ABC transporter                                                    | thiosulfate[p] + ATP + H2O = thiosulfate + phosphate + ADP                                                                                      |
| R-5038 | 0        | R-5038 | 0        | R-5038 | thiosulfate ABC transporter                                                | Na+ + 2 H+[p] = Na+[p] + 2 H+                                                                                                                   |
| R-5039 | 0.0135   | R-5039 | 0.008    | R-5039 | sodium-proton antiporter                                                   | NO3-[p] + ATP + H2O = NO3- + phosphate + ADP                                                                                                    |
| R-5040 | 0        | R-5040 | 0        | R-5040 | nitrate ABC transporter                                                    | NO3-[e] = NO3-[p]                                                                                                                               |
| R-5041 | 0        | R-5041 | 0        | R-5041 | nitrate transport via diffusion (extracellular to periplasm)               | L-glutamate[e] = L-glutamate[p]                                                                                                                 |
| R-5042 | 0        | R-5042 | 0        | R-5042 | glutamate transport via diffusion (extracellular to periplasm)             | L-aspartate[e] = L-aspartate[p]                                                                                                                 |
| R-5043 | 0        | R-5043 | 0        | R-5043 | aspartate transport via diffusion (extracellular to periplasm)             | L-aspartate[p] + ATP + H2O = L-aspartate + phosphate + ADP                                                                                      |
| R-5044 | 0        | R-5044 | 0        | R-5044 | aspartate ABC transporter                                                  | L-glutamate[p] + ATP + H2O = L-glutamate + phosphate + ADP                                                                                      |
| R-5045 | 0        | R-5045 | 0        | R-5045 | glutamate ABC transporter                                                  | H2O[e] = H2O[p]                                                                                                                                 |
| R-5046 | -30.5264 | R-5046 | -31.8651 | R-5046 | H2O transport via diffusion (extracellular to periplasm)                   | H2O[p] = H2O                                                                                                                                    |
| R-5047 | -30.5264 | R-5047 | -31.8651 | R-5047 | H2O transport via aquaporin                                                | ethanolamine[e] = ethanolamine[p]                                                                                                               |
| R-5048 | 0        | R-5048 | 0        | R-5048 | ethanolamine transport via diffusion (extracellular to periplasm)          | ethanolamine[p] = ethanolamine                                                                                                                  |
| R-5049 | 0        | R-5049 | 0        | R-5049 | ethanolamine transporter (permease)                                        | (S)-malate[e] = (S)-malate[p]                                                                                                                   |
| R-5050 | 0        | R-5050 | 0        | R-5050 | malate transport via diffusion (extracellular to periplasm)                | (S)-malate[p] = (S)-malate                                                                                                                      |
| R-5051 | 0        | R-5051 | 0        | R-5051 | malate symport (periplasm to cytoplasm)                                    | pyruvate[e] = pyruvate[p]                                                                                                                       |
| R-5052 | 0        | R-5052 | 0        | R-5052 | pyruvate transport via diffusion (extracellular to periplasm)              | pyruvate[p] = pyruvate                                                                                                                          |
| R-5053 | 0        | R-5053 | 0        | R-5053 | pyruvate symport (periplasm to cytoplasm)                                  | D-glucose[e] = D-glucose[p]                                                                                                                     |
| R-5054 | 0        | R-5054 | 0        | R-5054 | glucose porin B (extracellular to periplasm)                               | D-ribose[e] = D-ribose[p]                                                                                                                       |
| R-5055 | 0        | R-5055 | 0        | R-5055 | D-ribose transport via diffusion (extracellular to periplasm)              | 2-deoxy-D-ribose[e] = 2-deoxy-D-ribose[p]                                                                                                       |
| R-5056 | 0        | R-5056 | 0        | R-5056 | D-ribose ABC transporter                                                   | 5-dehydro-D-gluconate[p] = 5-dehydro-D-gluconate                                                                                                |
| R-5057 | 0        | R-5057 | 0        | R-5057 | 5-dehydro-D-gluconate transporter (inferred from physiology)               | 5-dehydro-D-gluconate transport via diffusion (extracellular to periplasm)                                                                      |
| R-5058 | 0        | R-5058 | 0        | R-5058 | 5-dehydro-D-gluconate transport via diffusion (extracellular to periplasm) | 5-dehydro-D-gluconate transport via diffusion (extracellular to periplasm)                                                                      |
| R-5059 | 0        | R-5059 | 0        | R-5059 | 5-dehydro-D-gluconate transport via diffusion (extracellular to periplasm) | Co2+[e] = Co2+[p]                                                                                                                               |
| R-5060 | 0        | R-5060 | 0        | R-5060 | Co2+ transport via diffusion (extracellular to periplasm)                  | Co2+[p] = Co2+                                                                                                                                  |
| R-5061 | 0        | R-5061 | 0        | R-5061 | Cobalt transporter (periplasm to cytoplasm)                                | H+[e] = H+[p]                                                                                                                                   |
| R-5062 | 0        | R-5062 | 0        | R-5062 | H+ transport via diffusion (extracellular to periplasm)                    | H2O2[e] = H2O2[p]                                                                                                                               |
| R-5063 | 0        | R-5063 | 0        | R-5063 | H2O2 transport via diffusion (extracellular to periplasm)                  | H2O2[p] = H2O2                                                                                                                                  |
| R-5064 | 0.0252   | R-5064 | 0.0149   | R-5064 | H2O2 transport via diffusion (periplasm to cytoplasm)                      | Fe2+[p] + ATP + H2O = Fe2+ + phosphate + ADP                                                                                                    |
| R-5065 | 0        | R-5065 | 0        | R-5065 | H2O2 transport via diffusion (periplasm to cytoplasm)                      | Fe2+[e] = Fe2+[p]                                                                                                                               |
| R-5066 | 0        | R-5066 | 0        | R-5066 | iron ABC transporter                                                       | molybdate[p] + ATP + H2O = molybdate + phosphate + ADP                                                                                          |
| R-5067 | 0        | R-5067 | 0        | R-5067 | iron transport via diffusion (extracellular to periplasm)                  | molybdate[e] = molybdate[p]                                                                                                                     |
| R-5068 | 0.0014   | R-5068 | 0.0008   | R-5068 | molybdate ABC transporter                                                  | K+ + H+[p] = K+[p] + H+                                                                                                                         |
| R-5069 | 0.0006   | R-5069 | 0.0004   | R-5069 | molybdate transport via diffusion (extracellular to periplasm)             | K+[e] = K+[p]                                                                                                                                   |
| R-5070 | 0.0006   | R-5070 | 0.0004   | R-5070 | potassium-proton antiporter                                                | Mg2+[e] = Mg2+[p]                                                                                                                               |
| R-5071 | 0        | R-5071 | 0        | R-5071 | potassium transport via diffusion (extracellular to periplasm)             | Mg2+[p] + ATP + H2O = Mg2+ + phosphate + ADP                                                                                                    |
| R-5072 | 0.0343   | R-5072 | 0.0203   | R-5072 | magnesium transport via diffusion (extracellular to periplasm)             | Ca2+[e] = Ca2+[p]                                                                                                                               |
| R-5073 | 0.0015   | R-5073 | 0.0009   | R-5073 | magnesium ABC transporter                                                  | Ca2+[p] + ATP + H2O = Ca2+ + phosphate + ADP                                                                                                    |
| R-5074 | 0.0015   | R-5074 | 0.0009   | R-5074 | calcium transport via diffusion (extracellular to periplasm)               | Cu2+[e] = Cu2+[p]                                                                                                                               |
| R-5075 | 0.0009   | R-5075 | 0.0005   | R-5075 | calcium ABC transporter                                                    | Cu2+[p] + ATP + H2O = Cu2+ + phosphate + ADP                                                                                                    |
| R-5076 | 0.0009   | R-5076 | 0.0005   | R-5076 | copper transport via diffusion (extracellular to periplasm)                | Cu2+ + ATP + H2O = Cu2+[p] + phosphate + ADP                                                                                                    |
| R-5077 | 0.0006   | R-5077 | 0.0004   | R-5077 | copper ABC transporter                                                     | Mn2+[e] = Mn2+[p]                                                                                                                               |
| R-5078 | 0.0006   | R-5078 | 0.0004   | R-5078 | copper-exporting ATPase                                                    | Mn2+[p] + H+[p] = Mn2+ + H+                                                                                                                     |
| R-5079 | 0        | R-5079 | 0        | R-5079 | manganese transport via diffusion (extracellular to periplasm)             | Fe2+[p] + H+[p] = Fe2+ + H+                                                                                                                     |
| R-5080 | 0.0006   | R-5080 | 0.0004   | R-5080 | copper-exporting ATPase                                                    | Co2+ + ATP + H2O = Co2+[p] + phosphate + ADP                                                                                                    |
| R-5081 | 0.0006   | R-5081 | 0.0004   | R-5081 | manganese-proton symport                                                   | Zn2+ + ATP + H2O = Zn2+[p] + phosphate + ADP                                                                                                    |
| R-5082 | 0.0014   | R-5082 | 0.0008   | R-5082 | iron-proton symport                                                        | Zn2+[p] + ATP + H2O = Zn2+ + phosphate + ADP                                                                                                    |
| R-5083 | 0        | R-5083 | 0        | R-5083 | cobalt-exporting ATPase                                                    | Cl-[e] = Cl-[p]                                                                                                                                 |
| R-5084 | 0        | R-5084 | 0        | R-5084 | cadmium-exporting ATPase                                                   | Cl-[p] = Cl-                                                                                                                                    |
| R-5085 | 0        | R-5085 | 0        | R-5085 | zinc transport via diffusion (extracellular to periplasm)                  | Na+[p] + Ca2+ = Na+ + Ca2+[p]                                                                                                                   |
| R-5086 | 0.0006   | R-5086 | 0.0004   | R-5086 | zinc ABC transporter                                                       |                                                                                                                                                 |
| R-5087 | 0.0006   | R-5087 | 0.0004   | R-5087 | chloride transport via diffusion (extracellular to periplasm)              |                                                                                                                                                 |
| R-5088 | 0.0009   | R-5088 | 0.0005   | R-5088 | chloride channel                                                           |                                                                                                                                                 |
| R-5089 | 0.0009   | R-5089 | 0.0005   | R-5089 | sodium/calcium exchanger                                                   |                                                                                                                                                 |
| R-5090 | 0        | R-5090 | 0        | R-5090 |                                                                            |                                                                                                                                                 |

|                  |        |                  |        |                  |                                                                                                                                     |
|------------------|--------|------------------|--------|------------------|-------------------------------------------------------------------------------------------------------------------------------------|
| R-5091           | 0      | R-5091           | 0      | R-5091           | D-arabinose transport via diffusion (extracellular to periplasm) D-arabinose[e] = D-arabinose[p]                                    |
| R-5092           | 0      | R-5092           | 0      | R-5092           | L-arabinose transport via diffusion (extracellular to periplasm) L-arabinose[e] = L-arabinose[p]                                    |
| R-5093           | 0      | R-5093           | 0      | R-5093           | D-arabinonate transport via diffusion (extracellular to periplasm) D-arabinonate[e] = D-arabinonate[p]                              |
| R-5094           | 0      | R-5094           | 0      | R-5094           | L-arabinonate transport via diffusion (extracellular to periplasm) L-arabinonate[e] = L-arabinonate[p]                              |
| R-5095           | 0      | R-5095           | 0      | R-5095           | L-xylose transport via diffusion (extracellular to periplasm) L-xylose[e] = L-xylose[p]                                             |
| R-5096           | 0      | R-5096           | 0      | R-5096           | D-xylose transport via diffusion (extracellular to periplasm) D-xylose[e] = D-xylose[p]                                             |
| R-5097           | 0      | R-5097           | 0      | R-5097           | D-xylonate transport via diffusion (extracellular to periplasm) D-xylonate[e] = D-xylonate[p]                                       |
| R-5098           | 0      | R-5098           | 0      | R-5098           | L-xyxonate transport via diffusion (extracellular to periplasm) L-xyxonate[e] = L-xyxonate[p]                                       |
| R-5099           | 0      | R-5099           | 0      | R-5099           | D-ribonate transport via diffusion (extracellular to periplasm) D-ribonate[e] = D-ribonate[p]                                       |
| R-5100           | 0      | R-5100           | 0      | R-5100           | 2-deoxy-D-ribonate transport via diffusion (extracellular to periplasm) 2-deoxy-D-ribonate[e] = 2-deoxy-D-ribonate[p]               |
| R-5101           | 0      | R-5101           | 0      | R-5101           | acetoacetate symport (periplasm to cytoplasm) acetoacetate[p] = acetoacetate                                                        |
| R-5102           | 0      | R-5102           | 0      | R-5102           | acetoacetate transport via diffusion (extracellular to periplasm) acetoacetate[e] = acetoacetate[p]                                 |
| R-5103           | 0      | R-5103           | 0      | R-5103           | propanoate symport (periplasm to cytoplasm) propanoate[p] = propanoate                                                              |
| R-5104           | 0      | R-5104           | 0      | R-5104           | propanoate transport via diffusion (extracellular to periplasm) propanoate[e] = propanoate[p]                                       |
| R-5105           | 0      | R-5105           | 0      | R-5105           | 3-O-b-D-galactopyranosyl-D-arabinose transport via diffusion 3-O-b-D-galactopyranosyl-D-arabinose[e] = 3-O-b-D-galactopyranosyl-D   |
| R-5106           | 0      | R-5106           | 0      | R-5106           | 3-O-b-D-galactopyranosyl-D-arabinonate transport via diffusion 3-O-b-D-galactopyranosyl-D-arabinonate[e] = 3-O-b-D-galactopyranosyl |
| R-5107           | 0      | R-5107           | 0      | R-5107           | short-chain fatty acid (decanoate) transporter (periplasm to cytoplasm) decanoate[p] = decanoate                                    |
| R-5108           | 0      | R-5108           | 0      | R-5108           | decanoate transport via diffusion (extracellular to periplasm) decanoate[e] = decanoate[p]                                          |
| R-5109           | 0      | R-5109           | 0      | R-5109           | methylamine transport via diffusion (extracellular to periplasm) methylamine[e] = methylamine[p]                                    |
| R-5110           | 0      | R-5110           | 0      | R-5110           | ethylamine transport via diffusion (extracellular to periplasm) ethylamine[e] = ethylamine[p]                                       |
| R-5111           | 0      | R-5111           | 0      | R-5111           | acetaldehyde transport via diffusion (periplasm to cytoplasm) acetaldehyde[p] = acetaldehyde                                        |
| R-5112           | 0      | R-5112           | 0      | R-5112           | ethanol transport via diffusion (extracellular to periplasm) ethanol[e] = ethanol[p]                                                |
| R-5113           | 0      | R-5113           | 0      | R-5113           | L-tartrate transport via diffusion (extracellular to periplasm) L-tartrate[e] = L-tartrate[p]                                       |
| R-5114           | 0      | R-5114           | 0      | R-5114           | L-tartrate transporter L-tartrate[p] = L-tartrate                                                                                   |
| R-5115           | 0      | R-5115           | 0      | R-5115           | glycerone transport via diffusion (extracellular to periplasm) glycerone[e] = glycerone[p]                                          |
| R-5116           | 0      | R-5116           | 0      | R-5116           | glycerone transport via diffusion (periplasm to cytoplasm) glycerone[p] = glycerone                                                 |
| R-5117           | 0      | R-5117           | 0      | R-5117           | 1,2-propanediol transport via diffusion (extracellular to periplasm) 1,2-propanediol[e] = 1,2-propanediol[p]                        |
| R-5118           | 0      | R-5118           | 0      | R-5118           | (S)-lactate transport via diffusion (extracellular to periplasm) (S)-lactate[e] = (S)-lactate[p]                                    |
| R-5119           | 0      | R-5119           | 0      | R-5119           | (S)-lactate transport (periplasm to cytoplasm) (S)-lactate[p] = (S)-lactate                                                         |
| R-oxs            | 2.1266 | R-oxs            | 1.2569 | R-oxs            | oxalyl-CoA synthase ATP + oxalate + CoA = AMP + diphosphate + oxalyl-CoA                                                            |
| A-GAM            | 9.994  | A-GAM            | 5.907  | A-GAM            |                                                                                                                                     |
| mue              | 0.1861 | mue              | 0.11   | mue              |                                                                                                                                     |
| NGAM             | 9.5    | NGAM             | 9.5    | NGAM             |                                                                                                                                     |
| COFAC            | 0.0005 | COFAC            | 0.0005 | COFAC            |                                                                                                                                     |
| SECMET           | 0.0002 | SECMET           | 0.0002 | SECMET           |                                                                                                                                     |
| POLYN            | 0.004  | POLYN            | 0.004  | POLYN            |                                                                                                                                     |
| PROTEIN          | 0.5913 | PROTEIN          | 0.5913 | PROTEIN          |                                                                                                                                     |
| RNA              | 0.082  | RNA              | 0.082  | RNA              |                                                                                                                                     |
| DNA              | 0.03   | DNA              | 0.03   | DNA              |                                                                                                                                     |
| Fatty            | 0.0362 | Fatty            | 0.0362 | Fatty            |                                                                                                                                     |
| Carbohydrate     | 0.1643 | Carbohydrate     | 0.1643 | Carbohydrate     |                                                                                                                                     |
| PHB              | 0.0236 | PHB              | 0.0236 | PHB              |                                                                                                                                     |
| Intra-metabolite | 0.0264 | Intra-metabolite | 0.0264 | Intra-metabolite |                                                                                                                                     |
| GAM              | 0.01   | GAM              | 0.01   | GAM              |                                                                                                                                     |
| NOQUANTY         | 0.001  | NOQUANTY         | 0.001  | NOQUANTY         |                                                                                                                                     |
| Inorganic        | 0.011  | Inorganic        | 0.011  | Inorganic        |                                                                                                                                     |
